# Supplementary material for: Conservation of the cooling agent binding pocket within the TRPM subfamily
Source: eLife. 2024 Nov 1;13:RP99643. doi: 10.7554/eLife.99643 (PMC11530238; doi:10.7554/eLife.99643)
Supplement: Figure 3—source data 1. [file elife-99643-fig3-data1.xlsx]

## Sheet: Avg&SEM
0 uM icilin
	0 uM Ca		20 uM Ca		500 uM Ca		3 mM Ca
Voltage (mV)	Avg	SEM	Avg	SEM	Avg	SEM	Avg	SEM
160	0.00256668	0.00347917	0.148583	0.0591923	1		2.64956	0.293503
140	0.00568692	0.00245008	0.119649	0.0468405	0.674579	0.0134782	2.15364	0.249808
120	0.00152957	0.00174219	0.0662921	0.0297748	0.441323	0.0140228	1.63219	0.15842
100	0.00194398	0.00169807	0.0471289	0.0193664	0.280764	0.0133405	1.20636	0.107535
80	0.00215812	0.00136305	0.0288717	0.0116856	0.166026	0.010415	0.813929	0.0607452
60	0.00142739	0.00101455	0.0174515	0.00673886	0.0908478	0.00737057	0.493741	0.0375894
40	0.000993496	0.0007136	0.00829636	0.00355276	0.0433098	0.00453487	0.253911	0.0192184
20	9.61991e-05	0.000457917	0.0028136	0.00137381	0.0149954	0.00220363	0.0937941	0.00922288
0	5.76568e-05	0.000326907	-0.000140485	0.000271054	-0.00377658	0.000877899	-0.0246885	0.00323674
-20	-0.000846412	0.000462827	-0.00272365	0.000912729	-0.0157183	0.00199184	-0.104375	0.00829678
-40	-0.000400019	0.000533652	-0.00464578	0.00166658	-0.0221541	0.00345414	-0.160943	0.0126879
-60	-0.000919699	0.00123184	-0.00492574	0.00226277	-0.0301497	0.00497102	-0.190507	0.0198258
-80	-0.00184924	0.00136831	-0.00681052	0.00264438	-0.0352344	0.00604194	-0.230164	0.0255812
-100	-0.00107022	0.00184913	-0.00861191	0.00324217	-0.0433467	0.00765904	-0.241193	0.0289531
25 uM icilin
	0 uM Ca		20 uM Ca		500 uM Ca		3 mM Ca
Voltage (mV)	Avg	SEM	Avg	SEM	Avg	SEM	Avg	SEM
160	0.0338752	0.0233212	0.577006	0.231489	1.52779	0.124274	4.13377	1.39781
140	0.0331183	0.015196	0.41502	0.138026	1.14908	0.105882	3.33076	1.13136
120	0.0283513	0.0121018	0.289152	0.0909842	0.814861	0.0787179	2.54715	0.83887
100	0.0215657	0.00907169	0.184131	0.040838	0.568979	0.0477551	1.94528	0.644138
80	0.0169507	0.00751991	0.119572	0.0240053	0.376374	0.0388245	1.37558	0.443508
60	0.0120589	0.00613966	0.0615023	0.0156597	0.229295	0.0231242	0.911989	0.294961
40	0.010691	0.0043699	0.0339893	0.00717693	0.120754	0.0123734	0.51782	0.161509
20	0.00443867	0.00202804	0.00944478	0.00459713	0.0465255	0.00805903	0.189631	0.0511166
0	-0.00022044	0.000815695	-0.00702346	0.00102446	-0.0104957	0.00476533	-0.105064	0.0618087
-20	-0.00287665	0.00129842	-0.0232411	0.00299618	-0.0567935	0.00752792	-0.352944	0.149018
-40	-0.00679508	0.00286772	-0.0362435	0.00676889	-0.096529	0.0131491	-0.573437	0.238445
-60	-0.0108839	0.00480702	-0.0517976	0.0125774	-0.127809	0.0183726	-0.797125	0.33236
-80	-0.0149817	0.00621979	-0.0757496	0.0170177	-0.162159	0.0256602	-1.00588	0.435039
-100	-0.0196187	0.00749535	-0.106214	0.0268738	-0.220192	0.0348484	-1.23624	0.541684

## Sheet: 0uM_Ca
0 uM icilin
Voltage (mV)	Normalized Current (to 500 uM Ca at +160 mV)
160	-0.018018	0.000572473	3.278176653998798e-05	0.000387686	-0.00253632	-0.00676069	-0.00172282	0.000451597	0.00717113	0.00277608	0.066734	-0.00196206	0.00833876	0.000423715	-1.92987e-05	0.000605464	0.00185158	-0.0018676	0.0569108	-0.0168971	0.00591866	0.00424867	-0.0130394	-0.00654007	0.00179949	0.014717091620565885	0.00742688	-0.00054594	-0.000679329	-0.00158744	-0.0246773	-0.00284797	0.023978595275983648	0.010174031647381643	0.010223967075945162	0.0250063	0.022400585831490464	0.029802	0.0248547	0.00411829	0.0517612	-0.100056	-0.000724993	-0.0146744	-0.0086912	-0.0392526	0.000625287	0.00298934
140	0.009009	-0.0025431	0.000135225	-0.00108552	0.000153717	-0.00584259	-0.00469712	0.000641743	0.00772486	0.00192626	0.0703683	-0.00519683	0.00662357	0.000684462	0.00320359	0	0.00199623	-0.00450575	0.00553917	0.021217341352509224	0.0054779	0.00313059	-0.00538136	-0.000877496	0.00128535	0.045106956108382196	0.00273955	-0.000322869	0.000339664	-0.00449775	-0.000679194	-0.00255587	0.025320290804705294	0.00321285	0.00407776	0.026100841560270347	0.024640583857785593	0.014084494606883767	0.020800320229752138	0.00658589	0.057345410207280956	-0.0252006	0.00044207	-0.00687863	-0.0158487	-0.0174424	-0.000404598	0.00701846
120	0.013167	-0.000968802	4.0977282025756194e-05	-0.00341163	0.00112725	-0.00342207	-0.00544476	0.00114088	0.00459464	0.000750674	0.035537578648966325	-0.00403018	0.00600318	0.000717056	0.00218076	-0.00110497	0.00199623	-0.00299077	0.00661128	-0.0181451	0.00264451	0.00229203	-0.00206975	-0.00589567	0.00190966	-0.0147171	0.00292958	-0.000140888	-0.00108431	-0.00401271	-0.00611275	-0.00255587	0.020213	0.00473003	0.0158383	0.016923434100034298	0.0302407	0.00653195	0.0204478	0.00103809	0.018256033598482647	-0.0319208	0.00263473	-0.0103944	-0.0189161	-0.0190043	-0.00191264	0.011177520531067147
100	0.00762302	-0.00095779	2.0488567162106875e-05	-0.00131813	0.00099916	-0.00200317	-0.00367319	0.00109334	0.00326751	0.00150135	0.045330553099196855	-0.00444115	0.00425148	0.000651869	0.0014667	-0.00184667	0.00144655	-0.00142355	-0.0092022	0.015841	0.00107039	0.00279517	-0.00424298	-0.00282444	0.001065	-0.00210244	0.0019161	-0.000146758	5.225603209583546e-05	-0.0030867	-0.00588635	-0.00149701	0.015322022528003994	0.00339133	0.000827375	0.014818531928001533	0.026569656081926695	0.014288667834071546	0.023797009918227047	0.000204213	0.020350113220693255	-0.0332275	0.0012378	-0.00377051	-0.0224948	-0.00778109	-0.0018023	-0.00415908
80	0.002772	-0.000528438	0.000127029	-0.00131813	0.00107602	-0.00275436	-0.00299056	0.000855657	0.00177562	0.000736512	0.0330136	-0.0034336	0.00313843	0.000619276	0.00113862	-0.0014077	0.00138869	-0.00104481	0.000982759	0.028897824717794677	0.00138522	0.0015653	-0.00144883	-0.000932338	0.000514139	-0.00133792	0.00128268	-0.000193721	-2.6128e-05	-0.00149925	0	-0.00151527	0.011340026209866143	0.0033021	0.00951479	0.00370463	0.020036087399240125	0	0.019037595227051788	0.000816853	0.0187393	-0.026134	0.00132621	-0.000254764	-0.0138037	-0.0110497	-0.00123218	0.00740838
60	-0.020097	-0.000396327	0.000131127	-0.00418703	-0.000256194	-0.00275436	-0.00243795	0.000713048	0.000594924	0.000509892	0.0205956	-0.00314195	0.00236599	0.00104299	0.000849141	4.540979671115089e-05	0.00170693	-0.000914211	0.00652195	0.014976952943863463	0.000818537	-0.00016771	-0.00175929	-0.000178241	0.000330517	0.00114679	0.00112432	-0.00017611	-0.000156768	-0.000264575	0.00362237	-0.00135096	0.00831024	0.00142793	0.00407776	0.012797816131372021	0.013938146780842505	0.000612371	0.0192138	0.00136993	0.013155083318817859	-0.00466678	0.000795728	-0.00239478	-0.00715747	-0.012901	-0.00204138	0.00311931
40	0.009009	-0.000704583	1.2293169837572616e-05	-0.00224858	0.000128097	-0.00133545	-0.000780147	-0.000332756	0.000640689	0.000410747	0.020494692445696277	-0.0025984	0.00138675	-0.000228154	0.000868445	-0.000726558	0.000896861	-0.000692186	0.00142947	-0.00182412	0.000692609	-0.000279517	0.00113836	-0.000822654	0.000146897	0.00840975	-0.000221698	1.1740664958389847e-05	0	0.00030867	-0.000679194	-0.00052943	0.00523718	0.000981706	0.00212753	0.00547275	0.00840022	-0.00510309	0.00916626	0.000450971	0.00730241	-0.00168004	0.000530484	-0.00203811	-0.0127812	-0.00859102	-0.00104828	0.00727837
20	0.006237	-0.000286237	-5.32703e-05	-0.0012406	5.123880321359312e-05	-0.00233703	-0.000845157	-2.37683e-05	0.000375261	9.914588821499315e-05	0.00706714	-0.00123291	0.000881925	0.000228154	-0.000540364	-0.000620598	0.000318241	-0.000222022	-0.00357366	0.00326421	-0.000125929	-0.000391324	-0.00134534	0.00015082	-0.000477414	-0.00496941	0	-7.63143e-05	-0.000182896	0.00132287	-0.00249038	-0.000693734	0.00229397	-0.0011602	0.00319131	0.000505179	0.0062224	-0.000204124	0.00634587	0.000876418	0.00515464	-0.0104536	0.000371339	-0.000203811	-0.00664621	-0.00390501	-0.000717243	0.00467896
0	-0.002772	-0.000220182	-0.000118834	-0.00240366	2.561944777911164e-05	-0.00100159	-0.000243795	0.000356524	8.695054038717851e-05	-0.000212455	0.00827866	-0.000331429	0.000194632	0.000195561	-5.78962e-05	0.000257322	-8.6793e-05	-0.000169782	-0.000804074	0.00259216	-0.000314821	-0.000670841	-0.00144883	-2.74217e-05	-0.000587587	-0.00401375	-0.000300876	9.979559924756825e-05	-0.000143704	0.000485052	-0.00565995	-0.000200819	-0.000129848	0.000892461	0.00135926	-0.00176812	0.000933358	0.0034701	0.00634587	-0.000144651	0.00150344	0.00242672	0.000229876	0.00035667	-0.00511248	5.7851950554262695e-05	-0.000643678	0.00220951
-20	-0.016632	0	2.868408264787509e-05	-0.0024812	0.00040991	0.000584259	-8.12649e-05	0.000237683	0.000155596	-0.000240782	-0.00393742	0.00137875	-0.000121645	0.000423715	-0.000385974	0.000363278	0.000115724	-0.000143662	-0.00116144	-0.00124808	-0.000566679	-0.00245974	-0.00144883	-4.11326e-05	-0.000477414	-0.00745413	-0.000221698	0.000140888	-0.000692391	0.000749625	0.00135839	-0.000255587	-0.00168802	-0.000178492	0.000413687	-0.00210491	0.000373344	-0.00510309	-0.00158647	-0.000161669	-0.00424185	0.00821351	-0.000194511	-0.000203811	-0.00306749	0.00381823	-0.000551724	-0.000259942
-40	-0.001386	-4.40364e-05	-0.000118834	-0.000310149	-0.000230574	0.00141891	0.000568856	0.000380292	-0.000141867	0	-0.000706714	0.00228023	-0.000535238	9.778040416310793e-05	-0.00135091	4.540979671115089e-05	0.000925791	0.000182842	0.00160815	-0.0114247	-0.000314821	-0.000391324	-0.0008279	-0.000946048	-0.00132207	-0.00611619	-0.000728436	0.000117407	-0.00054869	0.00030867	-0.00181118	0.000365124	-0.00311634	-0.00151718	-0.00124106	-0.00530435	-0.00211561	-0.00510309	0.00334921	0.000706238	-0.00730241	0.016427086347151478	8.841383354366643e-05	0.00112096	0.00460122	0.00468601	-0.00235402	-0.00116974
-60	0.015246031448661747	4.403638051927953e-05	-0.000118834	-0.0018609	-0.000256194	0.00317168	0.000893917	9.507299270072993e-05	-0.000311191	-0.000325765	-0.00938919	0.0043616	-0.00105223	0.000619276	-0.000964934	0.0014077	0.000636482	0.000639947	0.000804074	-0.0250576	0.000692609	0.000111807	0.00155231	0.000178241	-0.000110173	-0.0114679	-0.000870956	0.000135018	-0.000156768	0.000881913	-0.0219606	0.000419893	-0.00636254	-0.000713967	-0.00124106	-0.00522016	-0.00404455	-0.0234742	0.000705096	-0.00054457	-0.0111147	0.029307365715477623	3.536559715476691e-05	0.00224192	0.00817996	0.012582784909374506	0.000128736	-0.00259942
-80	0.009009	0.000264218	-0.000290938	-0.000930448	0.000307433	0.00292129	0.00297431	0.000451597	-0.000201359	-0.000141637	-0.0306916	0.00592593	-0.00149623	9.778040416310793e-05	-0.00104213	0.00192235	-0.000231448	0.000457105	0.00250157	-0.0142089	-0.00100743	-0.000391324	0.00113836	-0.000493591	-0.000293793	-0.013188	-0.000364218	0.000193721	0.000313536	-0.000749625	-0.0296582	0.000602455	-0.0057133	0.000356984	0.000236392	-0.00589374	-0.0107025	-0.0234742	-0.00775604	-0.000408428	-0.015625	0.026694006903465864	-0.000530484	0.00509529	0.010736191118531378	0.010355495500004171	0.000404598	-0.00623863
-100	-0.010395	-0.000143118	-0.000237668	-0.0018609	-0.00043553	0.00467406	0.00302306	0.000641743	-0.000503398	-0.000311601	-0.0288743	0.00738424	-0.00155705	-0.000260748	-0.000405273	0.00225535	-0.000202517	0.00116235	0.00151881	-0.00768048	-0.00157411	-0.00128578	0.00186278	0.00183726	-0.00190966	-0.00974771	-0.00148854	0.000393313	-0.000156768	4.409570841167841e-05	-0.0276206	0.000565943	-0.00631925	-0.000624722	0.00206843	-0.00547275	-0.0105158	-0.0183711	-0.014807	-0.00173581	-0.0186319	0.0634682	-0.000530484	0.0112606	0.00920246	0.019525039828508037	0.00023908	-0.00883803
25 uM icilin
Voltage (mV)	Normalized Current (to 500 uM Ca at +160 mV)
160	0.012832443683486084	0.00798131	-0.0192439	0.0527816	0.11502457169359638
140	0.0219394	0.0070553	0.00430156	0.046124133267927934	0.086171
120	0.0223533	0.00370403	0.00724473	0.038399976135866466	0.0700544
100	0.013763834334888822	0.00273393	0.00747113	0.0318713	0.0519885
80	0.0075546	0.00352765	0.00565995	0.025250573402097395	0.042760509142356545
60	0.00507089	0.00304259	-0.000226398	0.0201747	0.0322329
40	0.00703715	0.00163154	0.00430156	0.014620692855343578	0.0258643
20	0.0016558	0.000352765	0.00158479	0.0082023	0.010397691338302328
0	0	-0.00246935	-0.00135839	0.00233563	0.000389914
-20	0	-0.00392451	-0.000679194	-0.00250115	-0.00727837
-40	-0.00041395	-0.00546785	-0.00339597	-0.00741147	-0.0172862
-60	0.00144883	-0.0060852	-0.00860309	-0.0137563	-0.0274239
-80	0.000620927	-0.00983333	-0.0104143	-0.0186299	-0.0366519
-100	0.00041395	-0.0130964	-0.015395	-0.0253057	-0.0447101

## Sheet: 20uM_Ca
0 uM icilin
Voltage (mV)	Normalized Current (to 500 uM Ca at +160 mV)
160	0.0313195	0.8775006928040749	0.1804452817088362	-0.0482585	0.00597897	0.0033209	0.024445	0.22454071801720962	-0.00737154	0.0400983	0.8730575680115993	0.12400605416545905	0.1524576605507762	-0.0218487	-0.0164356	0.010038309031158262	0.0233085	0.026184295696996093	0.2618499100948654	0.20703022422782258
140	0.0204626	0.6213842225418652	0.10866364434642324	0.015850573332314398	0.00652253	0.00195848	0.026368112444797934	0.16262999366987346	-0.00511617	0.033878132866709904	0.6426348816299247	0.055213	0.050019	-0.0248079	-0.0326477	0.013453370784421242	0.0185371	0.021483647473224534	0.4961764482993807	0.16031205782247887
120	0.014253878239677555	0.43997347550112836	0.0792598	-0.0362443	0.00299612	0.00237816	0.016036	0.12328025765701846	-0.00614548	0.0297121	0.4238797328023274	0.051550252793610925	-0.0119047	-0.0280191	-0.027169	0.00848599	0.0144513	0.0178847	0.11314957320895883	0.0980337
100	0.015944193185546233	0.28251065598648706	0.0448281	-0.0224129	0.00316846	0.00193415	0.00902838	0.0911476	-0.00441988	0.024388860269504226	0.28011363903835196	0.0359154	0.033506128579041713	-0.0227301	-0.0230882	0.00631275	0.011626825471348438	0.016599399827122677	0.0942275	0.0639763
80	0.00783393	0.17077950355639426	0.019645030529518676	-0.0121151	0.00200183	0.00145974	0.00537792	0.052550414936316146	-0.00364792	0.0193548	0.15986903736342367	0.018315042024925128	0.0131528	-0.0195819	-0.00933587	0.00496742	0.00962505	0.010282772232142742	0.0835243	0.0433759
60	0.00555853	0.0961901	0.010296973595540035	-0.017163	0.000464001	0.00105831	0.00391121	0.0370535	-0.00166503	0.015015131196125745	0.0864189	0.010363636363636365	0.0232335	-0.0133485	-0.00905636	0.00382904	0.00648526	0.00752846	0.0493118	0.0335443
40	0.00310433	0.043726989007508675	0.00617539	-0.00807673	0.000570058	0.000699457	0.00127115	0.0148021	-0.00195262	0.00972081	0.041714	0.00875548	-0.00556836	-0.0100113	-0.00620528	0.0041395	0.0045383	0.00506794	0.0399464	0.013509630706081811
20	0.00149528	0.014076822074717272	0.00267693	-0.004947	-5.30286e-05	0.000559567	0.00094521	0.00463169	-0.00134716	0.00558368	0.012002240769770321	0.000446707	-0.000288018	-0.00522605	-0.00402504	-0.000103488	0.00223487	0.00290122	0.018730856406688118	0.00597679
0	0.00100769	-0.00283276	0.000424911	0.00181727	0.000318172	0.000547402	-0.000717056	-0.00140881	0.000287595	0.00057862	-0.0016064	0	-0.000480029	-0.000692609	-0.00251566	0.00124185	0.000425037	0.000734484	0.000573394	-0.000512801
-20	-0.000650121	-0.0121502	-0.000354092	-0.000908631	0.000808687	0.000176385	0.000130374	-0.00692824	0.00139257	-0.00312455	-0.00992572	-0.00419905	-0.00595237	0.00264451	0.000279517	0.000103488	-0.000383904	-0.00235035	-0.00821864	-0.00486277
-40	-0.00173907	-0.0204242	0.000594876	-0.00242302	0.000596574	-5.47402e-05	0.00140152	-0.00963007	0.00193749	-0.00668306	-0.0108791	-0.00205486	-0.0127688	0.00472232	0.00631709	-0.0024837	-0.00301639	-0.00503122	-0.0200688	-0.0112286
-60	-0.00307182	-0.0233256	-0.000934801	0.00282685	0.00196206	-0.00038318	0.000814836	-0.00843354	0.00420797	-0.0111095	-0.0132691	-0.00116144	-0.00979261	0.00975947	0.00911226	-0.00196626	-0.00341401	-0.00620639	-0.0313455	-0.0127847
-80	-0.00251922	-0.0263551	0.00106227	-0.0120141	0.00104732	-0.000559567	0.000782243	-0.0119459	0.00552486	-0.0151309	-0.0107746	-0.00294827	-0.0207373	0.012592880908178967	0.012075136367025275	-0.00320811	-0.00477138	-0.00840983	-0.0328746	-0.0170462
-100	-0.00910168	-0.0342722	0.00230868	0.0022211	0.00050377	-0.00048658	0.00146671	-0.0128337	0.00638767	-0.0199046	-0.0221369	-0.010453	-0.016321	0.011711391727074243	0.015261641320971811	-0.00538136	-0.00678687	-0.0112743	-0.0409021	-0.022245
25 uM icilin
Voltage (mV)	Normalized Current (to 500 uM Ca at +160 mV)
160	1.2554617256863265	0.2790139439023605	0.2829351357601937	0.4906114521325255
140	0.81649	0.2003931987247609	0.27734656804049496	0.36584843623636093
120	0.5439889211697009	0.14973657939651566	0.16702886792523214	0.29585294390602834
100	0.2912478909135655	0.09908	0.1500568853675914	0.1961379877232291
80	0.18021139876489395	0.0913071	0.0724414	0.13432656740954832
60	0.0855489	0.029036035165684478	0.040463587769459464	0.0909608
40	0.039809019485977315	0.020012526970019002	0.0247335	0.0514023
20	0.00795602	-0.000982759	0.00941738	0.0213885
0	-0.00572833	-0.00696863	-0.0099348	-0.00546207
-20	-0.0150441	-0.0229608	-0.0259754	-0.0289839
-40	-0.0175322	-0.0429733	-0.0358067	-0.048662
-60	-0.0225661	-0.0579828	-0.0440856	-0.082556
-80	-0.0359613	-0.0739748	-0.0738902	-0.119172
-100	-0.0407348	-0.109354	-0.102556	-0.172212

## Sheet: 500uM_Ca
0 uM icilin
Voltage (mV)	Normalized Current (to 500 uM Ca at +160 mV)
160	1	1	1	1	1	1	1	1	1	1	1	1	1	1	1	1	1	1	1	1	1	1	1	1	1	1	1	1	1	1	1	1	1	1	1	1	1	1	1	1	1	1	1	1	1	1	1	1
140	0.8170482221139795	0.7269318222402114	0.7249812049787236	0.7610290521373374	0.7103749191984485	0.6804104791932417	0.6623119463842152	0.7052277166649532	0.7361554652344318	0.7056198819661419	0.6814739607783199	0.6899698953505042	0.7259473620748244	0.7313646408385426	0.5918723957789882	0.5640638128389511	0.6298853115816739	0.7167685840312201	0.6768524780214472	0.6645545966073073	0.7285607941572971	0.7578822860896567	0.696575	0.6591514492574563	0.5997797336418474	0.5588675397683824	0.6963857622320144	0.7615811223421024	0.8213586106873105	0.6927431929188237	0.5802581971895351	0.7533264019583327	0.6738228961902087	0.565641	0.7048039808795085	0.5830589334976193	0.7632989579735434	0.5147997998734495	0.7269533061815778	0.6691826406992792	0.7890359790203021	0.5859609341883044	0.6493109997832932	0.5856004437187895	0.3374224649779419	0.8381012853556208	0.7034815119254378	0.47998425912478865
120	0.5183658685850601	0.5070257100113887	0.47104532812636163	0.39102024845935635	0.511491	0.4038905870177381	0.4745553498617425	0.44016397656009043	0.49754054553372307	0.4532801364128326	0.5128731390808488	0.4626482534524777	0.4800662084689839	0.4508330092775887	0.4002358146038106	0.3339736804775051	0.4480252276979099	0.45553766705738913	0.3634431455897981	0.3557967152754227	0.47122677693603066	0.46668251822089146	0.40535953417411774	0.4317961896760484	0.42651456286261547	0.4449532562192996	0.39872314436402656	0.5307013738862169	0.6543905746736736	0.36149570618649285	0.3905363059196031	0.6132450679757314	0.42728478267652653	0.41374496160688146	0.5133264031492574	0.3941221279062358	0.4478246632366069	0.31108421501832045	0.5393990609135444	0.4641680723815366	0.522336	0.280754	0.40746491261616125	0.2440637000931148	0.1324130483656373	0.6908682197699539	0.5399353016824213	0.3272673184763208
100	0.3160078434311265	0.32313901024987796	0.2884552043376989	0.22842498008691886	0.3283128636069812	0.28470059447880813	0.28208745371889205	0.2876435009081252	0.3309112682933267	0.2874803447078764	0.40514998344232284	0.24838629521670572	0.2934438269372006	0.28245481918864274	0.2464443470578824	0.17846043887694643	0.27655154721955144	0.32364341632654986	0.1904762824847841	0.32421255891533496	0.31727709716806846	0.28544283264587295	0.26358292021500807	0.25655785910202866	0.2737418409449215	0.24541208242337398	0.25671019886298774	0.3411905603246713	0.49506036804731496	0.2467142750424772	0.2402082551288538	0.43170511825013486	0.27073231614090926	0.2913878460929734	0.3131023082625404	0.2524204341637659	0.315909	0.1551341289344733	0.391505	0.26823431988958746	0.3493351913139406	0.10042927984605136	0.2156239244330567	0.10577807816135862	-0.00971371	0.5408575849327295	0.3555490739390404	0.18039979949123242
80	0.10395019171443919	0.21060384201775376	0.16253963940145427	0.13569039001690864	0.2282436051343614	0.1713546054056656	0.16805607629938604	0.16331174394297662	0.18564345003233088	0.16037544160591394	0.11468938889434746	0.1314579251684427	0.1706312824054282	0.14504030235282092	0.1425210598440424	0.0931659	0.11523172316272241	0.16986023433932598	0.1241847808585322	0.19940444469052582	0.18291150157279093	0.18945676858007018	0.1603022198349019	0.1460619239417826	0.16155028334143007	0.1850151219747439	0.1411579031484737	0.21594114273985876	0.3570134297715244	0.1571127263132966	0.1675343963702241	0.29220944158561785	0.12599550688008984	0.20901393861604628	0.17948104566252843	0.16864497567578232	0.20291188753470804	0.0714433	0.2659978270123962	0.1541558043244901	0.22164934486829624	0.0360275	0.11635307914897955	0.051819045012846905	-0.0403886	0.39990115857167885	0.21962294669017726	0.13439006450947966
60	0.024948031024017388	0.11361372682071244	0.088728	0.060556727826609466	0.119309	0.12127518111145875	0.0900578	0.0919357	0.0989864	0.0824894	0.11711263223397635	0.0631041	0.0884784	0.0686744	0.0673332	0.0460455	0.050745	0.0947252	0.062003	0.12740004291043486	0.12108061858571369	0.083967	0.0866191	0.0786869	0.0907822	0.0961392	0.0666516	0.11551054695186848	0.22615085419374284	0.0760649	0.11750012240701146	0.1858303831120119	0.0750087	0.11646577431215681	0.0868743	0.10238265044445187	0.0815755	0.041232985564401026	0.14348707326526333	0.0829873	0.12172482533046892	-0.000186671	0.0610764	0.026597415191124154	-0.0777095	0.24887917156703285	0.13447372956633566	0.0933195
40	0.031185132451571812	0.0529648	0.039477372862204804	0.018764047456016546	0.062024563671622485	0.0609299	0.0509532	0.034392669887940784	0.0474658	0.0330297	0.045936454910352004	0.025175323744444977	0.0399421	0.0390144	0.0346605	0.015802625405104593	0.030522156617786612	0.042837257034181155	0.023407496860206746	0.0691242	0.0622088	0.042878	0.017903335907163084	0.0368	0.039809	0.0647934	0.033919724194616314	0.054459	0.12796189561319246	0.025839967830173838	0.0359973	0.10157732650724503	0.028955973665324968	0.0637216	0.055197638056935436	0.035699089852415884	0.0362143	0.00632783	0.0752692	0.036954148136788836	0.0695878	-0.0072802	0.027196132420615193	0.010547228685978963	-0.0608385	0.14494761821351418	0.0639264	0.0506889
20	0.011088013788452172	0.0188916	0.012272668863480943	0.00573776	0.020239357281374087	0.027209740306625912	0.0184309	0.010648195743805901	0.015706	0.00929139	0.015446747963041808	0.00652253	0.014348011005513715	0.00853948	0.00766161	0.00236131	0.00523651	0.015215062115456134	0.00312696	0.0272657	0.030223004961213565	0.0126342	0.013039431817757935	0.0113937	0.0156445	0.018157461437242083	0.010863204639375328	0.0177519	0.0507407	0.00983333	0.026262179497641626	0.039013529342089674	0.00805056	0.022668474537014698	0.021275317183732243	0.022733	0.00205339	0.012451550245007876	0.027675	0.012856954454838214	0.022712651686698018	-0.00840023	0.00838165	0.00570671	-0.0511248	0.0576784	0.0213885	0.022874911574696545
0	-0.00554401	-0.00113394	-0.00170055	-0.00542762	-0.00532884	0.00517485	0.000503844	-0.00311364	-0.00325836	-0.00396583	-0.00737002	-0.000821943	-0.0013381	-0.00270526	-0.00385974	-0.00280027	-0.00219876	-0.00178924	-0.00294827	0.00422426	0.00579273	-0.00609347	-0.00320811	-0.000863782	-0.000367243	-0.0194954	-0.000870956	-0.00284123	-0.0158728	-0.00255755	0.00135839	-0.0100226	-0.00411184	0.00160643	0.00212753	-0.000757765	-0.00740465	0.0026536	-0.00722722	-0.00263776	-0.0018256	-0.0126936	-0.0016445	0.00112096	-0.0286298	-0.0111654	-0.00647356	-0.00376916
-20	-0.024948	-0.0124293	-0.00803973	-0.0018609	-0.0238004	-0.00642684	-0.0113771	-0.00905572	-0.0133584	-0.00985792	-0.0102978	-0.0043616	-0.00970726	-0.00658388	-0.00683174	-0.00543404	-0.00752206	-0.0105918	-0.0129545	-0.0208333	-0.0147337	-0.017945	-0.00900341	-0.00556663	-0.00998897	-0.0416666	-0.00509905	-0.0150868	-0.0679983	-0.00855455	-0.015395	-0.048945	-0.00515063	-0.0189201	-0.013238	-0.00791446	-0.0135026	-0.00959379	-0.0267936	-0.0125421	-0.0216387	-0.0149337	-0.00542862	-0.00234383	-0.0286298	-0.0607735	-0.0191448	-0.0176761
-40	-0.00415802	-0.0179118	-0.0108794	-0.00635807	-0.0420158	-0.0210333	-0.0164643	-0.015687	-0.0205981	-0.0157217	-0.0152448	-0.00562102	-0.0127788	-0.00479124	-0.0127757	-0.00569138	0.000231448	-0.0127336	-0.01492	-0.0374425	-0.0262561	-0.0183922	-0.00496742	-0.0124906	-0.0160118	-0.0588684	-0.0112749	-0.0198359	-0.11853	-0.0123027	-0.018791	-0.0818065	-0.00683864	-0.034806	-0.0147745	-0.0193651	-0.00410676	-0.00979796	-0.047594	-0.0145842	-0.0265786	-0.0115736	-0.0115999	-0.0017324	-0.00817996	-0.100865	-0.0348322	-0.0240447
-60	-0.022176	-0.0183081	-0.0100927	-0.0169807	-0.0620758	-0.0262082	-0.0224454	-0.0235781	-0.0205661	-0.0162033	-0.0155477	-0.00869671	-0.0137216	-0.00606239	-0.015053	-0.00257322	-0.00679878	-0.0161815	-0.0296614	-0.0547236	-0.0367082	-0.00922407	-0.00921039	-0.0152465	-0.0194271	-0.0760701	-0.00742688	-0.0263402	-0.163287	-0.0138901	-0.0369029	-0.122883	-0.00835354	-0.0531906	-0.0200343	-0.0372147	0.012569225455409972	-0.018167	-0.091134	-0.0231782	-0.046177	-0.00634682	-0.00818712	-0.000509529	-0.00306749	-0.126233	-0.0333977	-0.0402911
-80	-0.02772	-0.0197283	-0.00820773	-0.00883926	-0.0753979	-0.0345547	-0.0275976	-0.0220332	-0.026465	-0.0188944	-0.0314992	-0.00631041	-0.0111062	-0.00954988	-0.0171373	-0.00499507	-0.00135975	-0.0155285	-0.00955956	-0.0747887	-0.0423122	-0.0264424	-0.0144883	-0.0165079	-0.0280206	-0.0674693	-0.0149804	-0.0286296	-0.194249	-0.0105389	-0.0434684	-0.161768	-0.00709833	-0.0456047	-0.0260623	-0.0345204	0.00348453	-0.0142887	-0.117575	-0.0203703	-0.0410761	-0.0474145	-0.0097432	-0.00540099	0.0163599	-0.146076	-0.0458114	-0.0499089
-100	-0.185724	-0.0274897	-0.00892484	-0.0284563	-0.0690699	-0.034972	-0.0261024	-0.02605	-0.0260348	-0.0248997	-0.0579504	-0.00935954	-0.017821	-0.000586683	-0.0121196	-0.00319382	-0.0185158	-0.0130732	-0.0268918	-0.0883256	-0.0550309	-0.0189513	-0.0008279	-0.0160143	-0.0294528	-0.0926987	-0.0112274	-0.0257708	-0.232069	-0.0183878	-0.0604483	-0.190595	-0.00562673	-0.0504238	-0.0241711	-0.0381409	0.00958247	-0.0136763	-0.0706856	-0.0286409	-0.0664733	-0.0298674	-0.0141109	0.00509529	0.0143149	-0.176853	-0.0695905	-0.0643357
25 uM icilin
Voltage (mV)	Normalized Current (to 500 uM Ca at +160 mV)
160	1.4588673359515894	1.720786461899638	1.382770945149101	1.8233456315579812	1.377290438926996	1.324854766851176	1.4173653484561188	0.9637756850712408	2.2810821548920646
140	1.183479287074195	1.4996492502899623	1.0867198969890972	1.3054228288141354	1.0187614723215148	0.9001573736930024	0.9781741080581918	0.6631195834897423	1.7062701414129524
120	0.8525968146685357	0.8676429898967315	0.7911682591638788	0.8501657027611565	0.7413583228673559	0.6460764380751647	0.7900616853237884	0.45460739991186694	1.3400679841664584
100	0.5914324243288073	0.651159	0.5190708560976197	0.5957175899372853	0.5006698225614272	0.4770236423244558	0.5359375422189233	0.3667648642914266	0.883036
80	0.38126789958067536	0.3952068864325541	0.37283989987725336	0.3675681425231452	0.3310984445947252	0.33072454364651577	0.37701796519491837	0.19130583799840056	0.6403358005797785
60	0.22748843866176496	0.21214208856779532	0.2453049411538184	0.19754084171580044	0.19771294238881915	0.19985471647547412	0.2042068723267971	0.17319449658076416	0.4062061303471313
40	0.11833404476242945	0.10273696566565586	0.13997147945798935	0.10299432919059051	0.0922004	0.10012311821565235	0.11804403006543636	0.10029459287427984	0.2120841120120076
20	0.0449069	0.0369852	0.0660211	0.0307537	0.027606575854184783	0.033598	0.0371285	0.0380349	0.1036949835925659
0	-0.00435588	-0.0220982	0.011852090303015716	-0.0181687	-0.0234969	-0.017386	-0.0276479	0.00520715	0.00163299
-20	-0.0332735	-0.0704814	-0.0243719	-0.054477	-0.0738856	-0.0586428	-0.0871771	-0.0314693	-0.0773629
-40	-0.0511846	-0.101031	-0.0608462	-0.0754231	-0.138301	-0.0907871	-0.148911	-0.0559203	-0.146357
-60	-0.0627935	-0.125455	-0.0757031	-0.102271	-0.134638	-0.114043	-0.213027	-0.102105	-0.22025
-80	-0.0773568	-0.154377	-0.0853017	-0.117084	-0.210578	-0.158319	-0.300953	-0.106634	-0.248826
-100	-0.0961284	-0.241916	-0.107003	-0.173267	-0.274547	-0.186997	-0.396375	-0.154403	-0.351093

## Sheet: 3mM_Ca
0 uM icilin
Voltage (mV)	Normalized Current (to 500 uM Ca at +160 mV)
160	2.492311468298363	1.3091021813326675	1.2252359156919252	3.6548673550967083	2.76568	1.3268099443296526	3.7540328871415647	2.169656729813455	2.390934807985617	2.635187569247884	5.359057933693366	2.3188827539758683	2.9128507897561726	2.779296850102617
140	2.026981209616658	1.1938908296850832	1.0598547776459288	2.9939236538819163	1.8299766610631458	1.0863021991761315	3.06301	1.7825086935402412	1.947518766881673	2.117352454346861	4.610128463587269	1.7606282602756265	2.401193068547769	2.277671548943873
120	1.5346240781753007	1.0487112807632655	0.8750164811361625	2.3630835350570045	1.3737820502358373	0.8771764736849031	2.322927392430341	1.3534129182308605	1.5709456292976371	1.6202479691025473	2.9450976352693616	1.3058384745881173	1.885569697899095	1.7742233609953217
100	1.1373261946619786	0.8740226956777494	0.6771062892015597	1.7054935064315813	0.8974392453199719	0.673453	1.7233455021997568	1.0162418814719025	1.1897627832073685	1.1575509911138426	2.0218446959106497	1.0181590601510926	1.4106394724735472	1.3866495850701748
80	0.7211180620562112	0.6716532550714026	0.49866738241886577	1.0220039067901538	0.6454603319678152	0.4754102891436242	1.1584136790539485	0.6740750748722105	0.8345830386584981	0.8723169949446243	1.191466662742617	0.6760088190257136	0.9893881306548076	0.9644345864086581
60	0.4381064636178908	0.46687374762220135	0.34281281196436314	0.565615	0.24134011196161317	0.30752602555834857	0.7276670098911042	0.4152600984999823	0.5275687834970731	0.5396669821603994	0.6493172152979091	0.43698335948966555	0.6310105811992025	0.6226292911137455
40	0.20744594625448068	0.267646	0.20051939123391913	0.2969398929685724	0.14897014901013528	0.1733242962241554	0.39001840931074294	0.19526994206451073	0.2682471178670938	0.2806922321256353	0.2582162249657872	0.18614561558451462	0.3329796043551603	0.348333
20	0.0708481	0.10494984140956114	0.079586	0.0795927	0.043468361867767785	0.0664346	0.1521815033230366	0.0697902	0.10478097494056798	0.1019225679694614	0.12451550245007874	0.043716	0.13289188774727803	0.13843869109080015
0	-0.0171974	-0.0184622	-0.0237242	-0.0540172	-0.0167534	-0.0204469	-0.0141101	-0.0248104	-0.0190887	-0.0355298	-0.0202082	-0.0371939	-0.00758141	-0.036515
-20	-0.0649102	-0.103629	-0.112533	-0.10433	-0.0393933	-0.086772	-0.123009	-0.126194	-0.101826	-0.125817	-0.0947136	-0.105941	-0.0975289	-0.174653
-40	-0.0956152	-0.15139	-0.186123	-0.149793	-0.107992	-0.148478	-0.199012	-0.164926	-0.164588	-0.208637	-0.100633	-0.145602	-0.153126	-0.277284
-60	-0.0931288	-0.171449	-0.253925	-0.135638	-0.0765225	-0.206624	-0.238054	-0.207675	-0.230541	-0.241117	-0.0955295	-0.183854	-0.182652	-0.350385
-80	-0.0887263	-0.18272	-0.326744	-0.139607	-0.130858	-0.260078	-0.262509	-0.208746	-0.241592	-0.321884	-0.142478	-0.269523	-0.19716	-0.449674
-100	-0.0988932	-0.184293	-0.379536	-0.140048	-0.128367	-0.304039	-0.273849	-0.244088	-0.272205	-0.311058	-0.120024	-0.228099	-0.206009	-0.486189
25 uM icilin
Voltage (mV)	Normalized Current (to 500 uM Ca at +160 mV)
160	11.039504415052395	2.5186604921369984	3.6432646015884647	2.390763982960944	3.0335224786880026	2.1768880851881174
140	8.904367592141583	2.140962607588005	2.9269296730089756	1.989587243557311	2.498647699099792	1.5240399705795546
120	6.636866624202232	1.7899786907298723	2.3631312176056687	1.4580062345971176	2.0029631299136916	1.0319689679888688
100	5.063759101752283	1.4401336492025887	1.8090600021298207	1.1030095803887645	1.5767563339387751	0.6789704718046259
80	3.5058888181148284	1.0916298615492672	1.2741428664523073	0.752094	1.1714372837312899	0.4582782480780673
60	2.3215531991956735	0.7377848676404646	0.8405511466858245	0.48653	0.8016559057101568	0.2838571702965937
40	1.2903668177901009	0.4396693690154482	0.45352302510804077	0.28435556788692856	0.4649747437920108	0.17403130372861983
20	0.43104649855745814	0.191977	0.14159110307218664	0.1075386398132885	0.18076285680194096	0.084871
0	-0.403327	-0.0176146	-0.10993	-0.0421101	-0.0629885	0.00558876
-20	-1.07207	-0.180087	-0.334377	-0.184967	-0.286897	-0.0592667
-40	-1.72349	-0.310985	-0.513582	-0.302921	-0.49749	-0.0921497
-60	-2.40055	-0.408142	-0.721095	-0.410912	-0.698298	-0.143748
-80	-3.1081	-0.495859	-0.870095	-0.52547	-0.887189	-0.148557
-100	-3.86002	-0.590572	-1.03638	-0.609011	-1.11119	-0.210293
