# Supplementary material for: Conservation of the cooling agent binding pocket within the TRPM subfamily
Source: eLife. 2024 Nov 1;13:RP99643. doi: 10.7554/eLife.99643 (PMC11530238; doi:10.7554/eLife.99643)
Supplement: Figure 3—source data 2. [file elife-99643-fig3-data2.xlsx]

## Sheet: Avg&SEM
0 uM icilin
	0 uM Ca		20 uM Ca		500 uM Ca		3 mM Ca
Voltage (mV)	Avg	SEM	Avg	SEM	Avg	SEM	Avg	SEM
160	0.0124365	0.0142626	0.135282	0.0570888	1		3.11092	0.39933
140	0.0580137	0.0312309	0.104969	0.0469626	0.763258	0.0536306	2.95912	0.395201
120	0.0263604	0.0178632	0.0835694	0.0379633	0.604735	0.0397687	2.6382	0.293287
100	0.0224687	0.0235608	0.0727156	0.0308237	0.521273	0.019875	2.45745	0.251031
80	0.0292599	0.0426759	0.0558758	0.0242662	0.412404	0.0235941	2.15984	0.186611
60	0.0697164	0.0792688	0.0540771	0.0197358	0.391195	0.0797981	1.84163	0.153338
40	0.0488032	0.0557139	0.0355218	0.0157664	0.322081	0.0688168	1.54282	0.12017
20	0.0618334	0.0612609	0.0315236	0.0117732	0.271567	0.0645605	1.37475	0.112171
0	0.0105538	0.0095057	0.0249223	0.0108504	0.155855	0.0257496	1.10851	0.0842894
-20	-0.0020861	0.00517218	0.0235524	0.00856255	0.11487	0.0308504	0.935812	0.0789594
-40	0.00486041	0.00451617	0.0199538	0.00762598	0.121813	0.019795	0.784657	0.0664466
-60	0.0115945	0.00716194	0.0153934	0.00645853	0.109214	0.0168429	0.632708	0.0663336
-80	0.00717949	0.00542538	0.017603	0.00635994	0.0975233	0.0169086	0.586158	0.0638218
-100	-0.00721405	0.00818098	0.0169597	0.00608119	0.082762	0.0243971	0.473076	0.0565629
25 uM icilin
	0 uM Ca		20 uM Ca		500 uM Ca		3 mM Ca
Voltage (mV)	Avg	SEM	Avg	SEM	Avg	SEM	Avg	SEM
160	0.0518938	0.0317588	0.650768	0.221782	1.6283	0.145087	4.48646	1.2534
140	0.0822097	0.0411832	0.553492	0.153255	1.46729	0.156668	4.35397	1.2855
120	0.0732116	0.0402156	0.461432	0.11658	1.21124	0.107404	4.06708	1.09101
100	0.0543236	0.0292293	0.385385	0.0501726	1.08693	0.0930424	3.89804	1.11974
80	0.0726991	0.0344695	0.335516	0.0421409	0.942895	0.0984302	3.6236	1.01327
60	0.0739056	0.0471359	0.27144	0.0310512	0.819374	0.0674173	3.49735	1.05356
40	0.071662	0.0420995	0.245278	0.0177714	0.725581	0.0669366	3.35514	1.09314
20	0.0892429	0.0498821	0.212199	0.0314232	0.638943	0.073852	3.29959	1.14247
0	0.0865195	0.0522171	0.195593	0.0328451	0.586521	0.0769022	3.08628	1.11822
-20	0.0714495	0.0450457	0.207003	0.0348232	0.531616	0.0616512	2.95089	1.02477
-40	0.0541924	0.0358968	0.177391	0.0348745	0.496355	0.0681143	2.71313	0.994206
-60	0.0539899	0.0334398	0.181543	0.0464971	0.44871	0.0697576	2.60182	0.97028
-80	0.0617741	0.0402776	0.194839	0.0440267	0.414172	0.0654437	2.46543	0.997771
-100	0.0620191	0.0452382	0.205865	0.0520977	0.435675	0.0740574	2.38476	0.973016

## Sheet: 0uM_Ca
0 uM icilin
Voltage (mV)	Normalized Conductance (to 500 uM Ca at +160 mV)
160	0.5865791814252501	-0.00417758	0.000261438	0.0036784	-0.000919349	0.00955413	-0.00090267	0.00731671	0.00437484	0.00303463	0.00854116	-0.00730505	0.00494361	-0.00110331	0.000371633	0.00397661	0.00118656	-0.00394639	0.013304455859621573	-0.00980392	0.014502029395486135	0.024995651602650333	0.028148178803526516	-0.00449819	0.00183511	0.0953697	0.00416847	-0.0019272	0.000156177	0.001784	0.13245479405486205	-0.0224757	0.024018546883324454	0.011735592941100513	0.0295043	-0.00623701	0.0256742	0.017432651662287215	0.049230748755622986	3.197857436785279e-05	0.0283528	-0.0535894	0.000742474	-0.107438	-0.266666	-0.0369363	-0.00711264	-0.0052687
140	0.7727261379062836	-0.00162855	0.000751632	-0.0018392	-0.000417885	-0.011374	-0.00711517	0.00770181	0.00239522	0.00133881	0.0362145	-0.00985742	0.00487725	0.00140422	0.00328274	0.00149708	-0.00410735	-0.00496229	0.00618812	-0.022409	0.022179601500522724	0.0340219	-0.012963	-0.00729896	0.00144187	0.10504477574761174	0.000216544	0.000260824	-0.00128846	0.00205846	0.21220523024161497	-0.0311673	0.023710597584798435	0.00216183	0.00826122	0.031482	0.0278317	0.3938192619673255	0.0670768	0.00901795	0.0629141	-0.0930232	0.000228454	-0.0826446	1.2333293283671751	-0.0173818	-0.00784843	0.0263436
120	0.34631984645872016	-0.00169936	0.000152506	0.00210194	0.00284162	0.00363967	-0.0061594	0.00670055	0.00442952	0.00151732	0.050222093603187024	-0.00963738	0.00421368	0.00190572	0.00359244	0.000842106	-0.00136911	-0.00390733	0.00804456	-0.0326798	0.012156155832974604	0.0308974	-0.0166667	-0.00831742	0.000393237	-0.024879	0.0042226	-0.000333275	-0.00113228	0.00535201	0.17753100800383945	-0.0339512	0.021863012786361213	0.011426796700978596	0.0114083	0.0225721	0.0446602	-0.00792394	0.015384603440780076	0.00310192	0.018212002536272424	-0.0242669	0.0012565	-0.153268	0.75	-0.0264349	-0.00699	0.0579559
100	-0.244589	-0.00010621	8.714598147501012e-05	-0.00236468	-0.00058504	-0.0077343	-0.0058939	0.00616144	0.00263584	0.00423956	0.056371752796950905	-0.0111776	0.0038653	0.00371114	0.00291111	-0.00369591	-0.00191676	-0.00382917	-0.00433169	-0.025677	-0.00170612	0.0433952	-0.0207407	-0.00619562	0.000262158	0.0525225	0.00552187	-0.000521648	-0.00218647	0.012488	0.10610261512080749	-0.0391798	0.024326440685491033	0.00679432	-0.00413059	0.0380161	0.0569579	0.0824089	-0.0295385	-0.000127914	0.030836149341688115	-0.0687562	0.00051402	-0.042825	1.083329328367175	-0.0147565	-0.00766448	0.0052687
80	-0.619047	0.00555831	0.000381264	0.00315291	-0.00309235	0.0159236	-0.00520363	-0.000385089	0.00297489	0.00227598	0.020498863979212977	-0.0124098	0.00384871	0.00371114	0.00198204	-0.00453802	-0.00127784	-0.00402455	-0.00371287	0.0597573	-0.00938365	0.0083319	-0.00629629	-0.00263102	0.00183511	0.013130615650960903	0.00341056	-0.000811451	-0.00382633	0.0120763	0.0783634	-0.0107286	0.029869195080802702	-0.000308833	0.00295043	0.016631999272038237	0.038187728439225445	0.015847852164972007	-0.00615385	0.00265422	0.0368379	-0.0798787	0.00239877	-0.0706236	1.9333293283671753	-0.0313236	-0.00944263	-0.0263436
60	-0.419913	0.0021242	0.000457518	0.0036784	-0.000501464	-0.00818927	-0.00169914	-0.00100123	0.00094059	0.00281149	0.0536385	-0.0124098	0.0038653	0.00100301	0.00167234	-0.00215205	-0.000182548	-0.00207088	0.0194925	0.00980392	-0.00618469	0.0119771	0.00592592	0.00080628	-0.000917554	0.025570127912914596	0	-0.000275314	-0.00152273	-0.00603814	0.0492371	-0.049365	0.026635921683537563	0.00555899	0.017899281799683794	0.036828013681398965	0.0504854	0.0118859	0.00369232	0.00140705	0.0337335	-0.148635	0.00257011	-0.0713749	3.7666586567343505	-0.0307804	-0.00809369	-0.032666
40	-0.378787	0.000849678	0.000294118	0.00236468	-8.35772e-05	-0.0045496	5.3098342740229934e-05	0.000154036	0.00125776	0.00254374	0.027331736541694115	-0.0132459	0.00345057	0.00330993	0.000867142	-0.00322806	-0.000365097	-0.00171922	0.00742574	-0.00980392	0.010236762806715455	-0.00190939	0.025185163429755377	0.00080628	0.0043256	0.017968214823948486	-0.00292335	0.000217353	-0.00206934	-0.00960616	0.11581120737493063	-0.0397229	0.031100936778547326	0.00772081	0.0078678	0.035640044320024836	0.0403452	0.0364501	-0.0110769	-0.00243037	0.0372518	-0.0960566	0.00119938	-0.0353117	2.6333233209179383	-0.0350352	-0.00797105	-0.0569023
20	-0.025974	0.000460242	0.000174292	-0.00157646	-0.00117008	0.010919010752758706	-0.003239	-0.00107825	0.00121402	0.00120493	0.025623456828131448	-0.0146101	0.00328468	0.00451356	0.00167234	-0.00542691	-0.00155166	-0.00171922	0.00154703	0.0831	0.00319898	0.00538101	0.00185185	0.000763845	0.00393237	0.00414652	0.000812041	0.000333275	-0.00288927	-0.00233292	0.052704607831864383	-0.0291303	0.027251820280589593	0.00710315	0.00413059	0.021383983770734864	0.0394822	0.00792394	0.024000062107943608	0.00198267	0.045116034463466494	-0.155713	0.00222743	-0.0405711	2.933323320917938	-0.0352163	-0.00527316	-0.0252898
0	0.0194805	-0.0010621	0.00050109	-0.00472937	-0.00208943	0.011828936514938578	-0.00472575	0.00154036	0.000623416	0.00169582	0.00785788	-0.0130259	0.00272064	0.00290873	0.00291111	-0.00196492	-0.00383353	-0.000664244	-0.00495049	0.053221317268535656	0.013009193776520512	0.00433952	-0.00666667	0.000297051	0.00393237	0.016586032955946642	0.000541361	7.245093021069456e-05	-0.00261596	-0.00548923	0.0305131	-0.0148706	0.0235567	0.00895614	0.00609755	0.012474052980628725	0.018554475464655107	-0.080824	0.019076920688156015	0.00527646	0.0395283	-0.048534	0.00137072	-0.0413223	0.4333323320917938	-0.0296035	-0.00613159	0.036881
-20	-0.04329	-0.000920485	0.000152506	-0.00446662	0.00058504	0.00272976	-0.00201773	0.000154036	-0.000820281	0.00133881	0.0297232	-0.0133339	0.00205707	0.00160482	0.0019201	-0.00332164	-0.00310332	-0.00105498	0.00402227	0.0345472	0.00639796	0.00607533	0.00814815	0.000551665	0.00314589	0.012439537171966272	0.00151581	0.000188373	-0.00113228	-0.00480308	0.0284326	-0.0164324	0.024788336885100338	0.014824000614475575	0.00826122	0.00534601	0.00970876	0.024564177996115617	0.011076929560719389	0.00172685	0.045323	-0.0920122	0.00234164	-0.012021	-0.199999	-0.0313236	-0.00275922	0.0389885
-40	-0.0670995	0.000424839	0.00050109	-0.000788228	-0.00058504	0.00636943	-0.00461954	-0.00184843	0.000689035	0.00191896	0.011615994187514238	-0.0126298	0.0026211	0.00230692	0.00222979	-0.000795321	-0.00237313	-0.000312585	-0.0120669	0.10690943358126073	0.00831737	0.00572817	-0.00148148	0.00271589	0.00170402	0.026952384510954178	0.00351884	0.000420216	-0.00054662	-0.00247016	0.0561719	-0.012562	0.019399584887231397	0.00494132	0.0088513	0.014256060549289969	0.0256742	0.00950871	0.018461541874062834	-0.00524447	0.0447021	-0.111223	0.000856702	-0.0323065	0.0833329	-0.0224516	0.012508415015526061	0.0410961
-60	-0.04329	0.000141613	0.000642701	-0.00446662	0.00150439	0.00181984	-0.0057877	0.00161738	0.00018593	-0.000357015	0.0413392	-0.0152262	0.00277041	0.00361084	0.000867142	-0.00355556	-0.00438117	-0.00207088	0.00278465	0.12791791471746375	0.00511837	0.00277729	0.00925925	0.000339486	0.000393237	0.017277111434941275	0.00221957	0.000217353	0.000234266	-0.00507754	0.0457696	-0.00156176	0.019553531788314687	0.013588593017909958	0.00727772	0.00445501	0.010356015242242786	0.0673535	0.022153836940030345	-0.000383742	0.0378727	-0.0970676	0.00182763	0.012021025664634692	0.2833323320917938	-0.0372985	-0.00104237	0.029504791422157905
-80	-0.08658	-0.00102669	0.000413942	-0.00840776	0.00175512	-0.00818927	-0.00695588	-0.00123229	0.000273427	0.000357015	0.043047491210462474	-0.01417	0.0024718	0.00290873	0.000867142	-0.00416374	-0.00392479	-7.81464e-05	-0.00123762	0.056022448086696056	0.00831737	0.00642249	0.00925925	0.00619562	0.000262158	0.021423632128934222	0.000216544	0.000304294	-0.00054662	-0.00137231	0.038141469486924394	0.00359883	0.015858417687799678	0.00247066	-0.00275373	0.00861301	0.0267529	0.0459588	0.0412308	0.00214256	0.0418048	-0.075834	0.00102804	-0.0270473	0.1999993992550763	-0.016386	-0.00361763	0.020021117960521567
-100	-0.0714284	0.000601855	0.000206972	-0.000262743	0.00225658	-0.00227479	-0.00801783	-0.00200247	0.000601541	0.000892538	0.0509053	-0.0124978	0.00268747	0.00310933	0.000867142	-0.0051462	-0.00337714	-0.001602	-0.00556931	0.036414532359573246	0.00853061	0.00503384	0.012962961974079788	-0.00309782	0.000655393	0.022114710607928856	0.00129926	-0.000231843	-0.000312354	-0.00658709	-0.0159501	0.00950636	0.017398053187710885	0.011426796700978596	0.00511408	0.010989010989010988	0.00668824	0.0459588	0.035077	0.00428513	0.0461508	-0.166835	0.00177052	-0.0706236	-0.316666	-0.0401051	-0.00355632	0.046364558288989416
25 uM icilin
Voltage (mV)	Normalized Conductance (to 500 uM Ca at +160 mV)
160	0.017037038025920208	0.020035663937872532	-0.0034674	0.051995844982484836	0.17386766331286108
140	0.00962963	0.0168794	0.0963938	0.0531608	0.23498478823167468
120	0.00333333	0.021408008310043778	0.0610264	0.0516279	0.22866231393595488
100	0.00370371	0.024289862241238594	0.026352178934054563	0.049727161216889706	0.16754518901714124
80	0.00777777	0.0310142	0.0755893	0.0457417	0.2033724167530756
60	0.00925925	0.015918779214997653	0.0339806	0.0500949	0.2602743055951201
40	0.023333262133744866	0.011939059678975093	0.034674	0.0502176	0.23814602537953458
20	0.020370380259202098	0.029641827220339822	0.0631068	0.0464774	0.2866178218874747
0	0.013333328883359053	0.0164677	0.0644936	0.046416	0.2918866770737192
-20	0.00962963	0.015369821680310638	0.039528518364837104	0.042982330124982045	0.24973697504206502
-40	0.00074074	0.017016595355279104	0.013869613905983631	0.0443926	0.19494232441897125
-60	0.00481481	0.0186634	0.018030510575966486	0.042982330124982045	0.1854586129753915
-80	0.0025926	0.022643088566270127	0.024271830584565234	0.0380772	0.22128584071132584
-100	0.00555556	0.0175656	0.00624132	0.039426	0.24130688270796066

## Sheet: 20uM_Ca
0 uM icilin
Voltage (mV)	Normalized Conductance (to 500 uM Ca at +160 mV)
160	0.015663985270503302	0.8372558759293864	0.1326310862176296	-0.0505637	-0.00255237	0.000680159	0.00511537	0.20142460064967685	-0.0109941	0.0346841	0.8566404660065096	0.0980817	0.13445394271867533	-0.0398806	0.018920283553047316	0.032222174755829905	0.0289836	0.025298247603388564	0.19972349886036692	0.1878461864677195
140	0.012212601605009867	0.6439001505940977	0.0941628	-0.0519303	-0.00303643	0.000265428	0.00511537	0.17962202650056372	-0.0111813	0.032858712638383976	0.7150005703960238	0.0479579	0.0280113	-0.0654724	-0.00312446	0.0366666	0.024188476069565753	0.024905009614794024	0.22391137017524196	0.16534337127411444
120	0.0113099	0.5300320899464642	0.0880935	-0.0529552	-0.00462066	0.000763107	0.0088265	0.17095073842135225	-0.0133801	0.036509680709315526	0.563943	0.0625	-0.00560224	-0.0586479	-0.00347162	0.0185185	0.019647735442127966	0.0229388	0.14512772608950167	0.13090392933092063
100	0.0207084	0.41115736688979826	0.0635933	-0.0580799	-0.00396056	0.00121102	0.00782346	0.15899646138218188	-0.0143626	0.0346841	0.46747123021042686	0.0683787	0.0434174	-0.0599275	-0.0102413	0.021851821196473484	0.019223427199167906	0.0313279	0.14789223928558082	0.10314684091016703
80	0.00722136	0.31926461196395206	0.031149595203894022	-0.033823	-0.00510474	0.000564036	0.00411233	0.12938995121842314	-0.0162807	0.035414452797289074	0.34435160055941055	0.022896029942163266	0.051820751859455456	-0.0603541	-0.0361048	0.0229629	0.018120133992076723	0.025822549172466253	0.16516932581050953	0.0909247
60	0.011363033480130682	0.25152052731587704	0.020394549528609186	-0.0331398	-0.00294843	0.00149303	0.00511537	0.13056673699250973	-0.0116023	0.036966	0.2663228328824153	0.0628094	0.11391226062666172	-0.0479847	-0.0321124	0.027407391585276636	0.017907979870596696	0.0196619	0.13959919789759495	0.10428918162785097
40	0.010301058969662519	0.181348	0.019814339095759654	-0.0307482	-0.00638091	0.00132714	0.00421265	0.0810158	-0.0141287	0.036783405438305015	0.212831	0.030940644300751007	-0.0270775	-0.0439326	-0.0336747	0.030370406959047774	0.0165924	0.030279230627489336	0.1430544657425052	0.067508
20	0.010354150996480307	0.13726060663402484	0.0156194	-0.0450974	-0.00594085	0.00152621	0.00561685	0.0706721	-0.0150643	0.036783405438305015	0.13198921740257144	0.0365099	0.057423	-0.0371082	-0.019441	0.0318518	0.015319301895161907	0.0229388	0.12854189241365566	0.050716716382882804
0	0.0057877	0.10762116517255246	0.00745269	-0.0642296	-0.00585284	0.00381554	0.00180542	0.0581604	-0.0120702	0.0358708	0.0976048	0.029084203412211067	0.10037357385656111	-0.0347622	-0.0328067	0.021851821196473484	0.010608945041834286	0.019006439785875937	0.10366276824969797	0.045462237291485255
-20	0.010301058969662519	0.0811095	0.00758657	-0.0266484	-0.00563281	0.00175846	-0.000902708	0.0680087	-0.0116023	0.035140728068299584	0.084359	0.029702942691895048	0.0597573	-0.032203	-0.0249957	0.023703722492483995	0.012433684629150924	0.020841566148365485	0.096752	0.0415786
-40	0.00897361	0.0724365	-0.00200822	-0.00819952	-0.00365252	0.00157598	-0.00160482	0.042799638324235625	-0.00846784	0.035961902255268054	0.046692477673572916	0.011757384610923625	0.0630253	-0.0307102	-0.0222184	0.00925925	0.013706762317022806	0.01822	0.10435377199865487	0.047175645435886676
-60	0.00552222	0.055582231473377965	0.0023206	-0.00375812	-0.00761309	0.00132714	-0.00210632	0.028925354140852615	-0.012538	0.0343192	0.039424787298618515	0.0287747	0.00233426	-0.024099	-0.0293352	0.024074	0.011203053061474219	0.0192686	0.0926055	0.0416356
-80	0.005947	0.047576302323564426	-0.00410568	0.00580799	-0.00338849	0.00144327	0.000702108	0.026819374211624974	-0.0119766	0.033680314520241485	0.0232095	0.013613825499463564	0.0798321	-0.0191939	-0.0244749	0.022592608414723363	0.013706762317022806	0.017564598659126022	0.0787836	0.043920314066498274
-100	0.012743579290664492	0.047434	-0.00209746	0.00409976	0.000308045	0.00126079	-0.00290873	0.023908330821696078	-0.0138947	0.033588853613199326	0.0355175	0.0287747	0.053221317268535656	-0.0219664	-0.0305502	0.012592595064800522	0.010736252810621473	0.022283407275115404	0.0801659	0.043977338463470426
25 uM icilin
Voltage (mV)	Normalized Conductance (to 500 uM Ca at +160 mV)
160	1.3082331266141372	0.4340966830310641	0.3470365841285437	0.5137038223951024
140	1.0108634501817704	0.39139831954515747	0.3685179449662781	0.4431900810007404
120	0.7958184599694034	0.34777207018921286	0.2674069643877458	0.4347297581028367
100	0.5331315490779885	0.3171406840035599	0.32888869902331963	0.3623772004464434
80	0.4472438354361666	0.32332919204783966	0.24259212781750122	0.3288983678295559
60	0.3269441200177658	0.24071835318102025	0.19888848542455423	0.3192092206026986
40	0.2653340132585416	0.218131	0.21259218121719256	0.2850563026974462
20	0.14156635028211415	0.1782176561513703	0.2537032685951075	0.2753074823467009
0	0.1262321725255383	0.16058113313600889	0.22074097411716959	0.2748168366613992
-20	0.10834235330887795	0.2088490423370233	0.24740744498496794	0.26341263965168576
-40	0.0773091	0.2085401187961573	0.1870364239294697	0.23667908014984584
-60	0.0647135	0.23638561687681645	0.151851	0.27322334324201875
-80	0.0776743	0.1992579143534576	0.21148146763711706	0.29094405092106573
-100	0.0763054	0.19801998969511367	0.21851821196473484	0.3306156277281116

## Sheet: 500uM_Ca
0 uM icilin
Voltage (mV)	Normalized Conductance (to 500 uM Ca at +160 mV)
160	1	1	1	1	1	1	1	1	1	1	1	1	1	1	1	1	1	1	1	1	1	1	1	1	1	1	1	1	1	1	1	1	1	1	1	1	1	1	1	1	1	1	1	1	1	1	1	1
140	0.8701296674832649	0.8495717399404825	0.799162	0.9048858330728944	0.839866	0.8444039573825388	0.7608447259176748	0.8050680421300435	0.8036796997579457	0.8214923971039345	0.7748548417883246	0.8065043668053004	0.790494	0.8551663051337671	0.7129142806112766	0.6638128739384701	0.7481732493296704	0.8127608153423854	0.8558163499735685	0.9374432066772119	0.8519924973863847	0.8937677142445989	0.8874067507889805	0.7502225553329153	0.7168714830406372	0.6226681114473963	0.8177796683922859	0.834547	0.9434249043008333	0.8467143175129226	0.5423013663018862	0.9293128556568562	0.8164735393358196	0.6383566340541919	0.8286741298999625	0.6771607350272718	0.9003266194882961	1.0824088883811265	0.9323067777511602	0.7981843309792187	0.9339823206892692	0.7785633844909087	0.7386471013284421	0.8039067006442564	-1.66666	0.9776376071946014	0.8374504105289912	0.6649119008823206
120	0.23593006381949536	0.7005586777534467	0.5905105562601352	0.5924842079343884	0.754703	0.7042769970990346	0.6629842924922821	0.6043590270336295	0.6164896594681111	0.6194659232938324	0.7461569248009655	0.660139	0.5965007534262958	0.6465401301518438	0.6026634517709833	0.48107626827113115	0.6282410225197809	0.6141517366094252	0.5872524987118892	0.6335206811833204	0.6643210749646393	0.6634277884489047	0.5770370647257658	0.5893066368906495	0.6354693767629092	0.6910859519984058	0.5524583734167458	0.655665	0.9109406665165505	0.5535874162194248	0.463245	0.9339313467539618	0.627869	0.5738110955142169	0.7081022637844122	0.5806362171681217	0.6105715841045183	0.5681452073574774	0.7624615152563727	0.7076521596802061	0.7887061280817574	0.5935287064337545	0.5938648336513936	0.5477071897265634	-1.08333	0.9478548027097229	0.8001105057849779	0.5310863215627291
100	0.2943717134520262	0.5603622089847837	0.4428642665588202	0.45139169057968953	0.6010037716750816	0.662875	0.4803794912428778	0.5098579193710475	0.48990388785076205	0.5118704266404578	0.7673380169818176	0.43447412751134923	0.445737	0.5226681127982645	0.46243372068361177	0.3376845662482378	0.4975341744666151	0.5406945874346685	0.374381	0.721756	0.5642995510731198	0.5085916823605228	0.44148194823433917	0.4442602138366704	0.5003283676583843	0.5362826788227528	0.4634585626950102	0.5101424825813999	0.8523741837424005	0.5047362303069276	0.4098480720295557	0.7969038732178916	0.5196318371514829	0.5336620183964191	0.5538933830567117	0.49599032239071206	0.5609495295124037	0.4160059408202902	0.7169230837481257	0.5160052515160353	0.6450762746633845	0.4277045422241336	0.3868292170776747	0.25394420778686194	0.4333323320917938	0.9389822876013209	0.6584708209474767	0.32139143051393365
80	0.073593	0.47879372565834133	0.323268	0.3489217831065148	0.5417475026208923	0.4904451809372627	0.36770534882074074	0.39918327235174256	0.3538038807547051	0.377097	0.2757088584992211	0.307824	0.340927	0.3630911062906724	0.3684739292053179	0.23737968203004328	0.2616831438864306	0.3678350161189691	0.3304455859621574	0.5294113687611482	0.38195836664411786	0.44992147858023257	0.42999967960185187	0.31402480994845283	0.388256	0.5127850639564573	0.342303	0.41233351787822126	0.8068101215942355	0.42143546113323277	0.4271830584565238	0.7647188398702809	0.3170140738767537	0.5135880364277151	0.37883471466957824	0.4455008216333106	0.49924488684967727	0.025356563463955217	0.7150775905666905	0.3875471293595018	0.5341486703218827	0.36804662130395327	0.2875655934963367	0.14725764563468316	0.5666652649285112	0.9135427407881169	0.5539279281270374	0.35300380199253273
60	-0.372294	0.35495306494341755	0.2470698868789829	0.212559	0.42582573174111604	0.4977246526303015	0.29124440897320325	0.3324875492063139	0.2614293824065094	0.28775349019014884	0.45678133600970394	0.20150435094331243	0.24092599679494847	0.2452360809833695	0.2540102474799906	0.17468955097030076	0.1933187478409633	0.2990269466348747	0.2633043443348776	0.47058863123885164	0.34101146915933833	0.3086267198067935	0.3644448835085733	0.22923811126237056	0.29964659135471744	0.37111185841148847	0.21697728465694774	0.3096123512759712	0.7280187457779779	0.30533821383523363	0.36407720880472333	0.7011613534846725	0.25388807494228377	0.3915990502344915	0.2804873552787369	0.32016614656653625	0.29946	-0.0309034	0.5249230305127455	0.29471424998184564	0.4211517660661669	0.1668351671580758	0.21623157257641168	0.0969195	3.933323320917938	0.8136869721848772	0.4949421502215642	0.42254912014828155
40	0.0670995	0.25596578003052434	0.17374736437060975	0.10168101448040077	0.3526968079337728	0.3562333038699764	0.26352707903898454	0.1849971406204021	0.2030363239271156	0.20510527272464055	0.3208061129617201	0.12669413962990808	0.17777093448778974	0.24322993492407807	0.21882924215531965	0.1069941249080963	0.1957832573900742	0.2140435726226809	0.21689332212137907	0.3758169824655875	0.25997017403603717	0.2523866131928499	0.1322221747558299	0.16422595102253087	0.20435193453435577	0.4650998268754125	0.16868791136313518	0.23503149450021416	0.6866316707948661	0.14999332228625134	0.16366151907973345	0.6037887780701218	0.16243284940507902	0.348981	0.2852077676235581	0.18918976785513558	0.25933120771444124	0.0887479	0.42399984029385934	0.2082117757985336	0.39507590168214535	0.21334676963783938	0.15472036429737504	-0.0045079	3.3999879851015256	0.731035	0.38095543301691853	0.37618608113702745
20	-0.103896	0.1970187689182222	0.1241394203774889	0.0717287	0.2677810982443033	0.3011821966982455	0.19348924092181843	0.1499539167948298	0.15366629609480334	0.1517315428900496	0.3184146198794402	0.0710262	0.13598208519696714	0.13069233550253073	0.1399814696984919	0.0568889	0.0861628	0.17782272091578843	0.10767323696108455	0.3730168613064988	0.24312234794908064	0.24006219146713045	0.20074011972210798	0.11385517842666382	0.1630621819676546	0.3614368095255888	0.12240157042419794	0.1771573471498261	0.6552789349245666	0.13530927707565604	0.26629638702388153	0.5728250627179833	0.12317194992008525	0.26961117722165756	0.18194289846646863	0.3050191892861157	0.0882417	0.0491283	0.4455379878800784	0.17575404093554445	0.28042296072507555	0.14357918368983277	0.11074302583390461	0.0623591	3.1333233209179383	0.6525426494198112	0.3227652967632856	0.3350899982148487
0	-0.021645	0.1304610814204554	0.0791286	0.11928478752924017	0.2637693253160133	0.3184715569279613	0.12674544344474237	0.10613073194565513	0.1239172599758734	0.11692245576840483	0.16296510661354974	0.0728744	0.0957533	0.0748247	0.11625888840516616	0.057122790095310044	0.0632531	0.10780287676769952	0.0940594	0.3767509171069902	0.2049481889182707	0.11456306427494385	0.22333352913220159	0.0715892	0.11666028830207936	0.32411911968015544	0.0886207	0.12633995257544578	0.5901528371988292	0.0989434	0.0755893	0.5587003610108303	0.0808316	0.21803530340288113	0.17643551440300043	0.146124	0.14455245353448948	0.080824	0.363076	0.15176950501349187	0.21937115363097237	0.14762355994037488	0.0659661	-0.00901577	-0.616665	0.5870903110438176	0.25685080613970146	0.2897790590353346
-20	0.017316	0.10801532854539607	0.0588779	0.0315291	0.21086495475194908	0.1778887072255193	0.11293998533940428	0.0790974	0.0865013	0.0847912	0.0461223	0.039649735580659796	0.0781357	0.052758496023138104	0.0517187	0.0418713	0.0569551	0.0829523	0.10550742643270261	0.33940194527647827	0.17231796937457722	0.1199444406209136	0.0766666	0.053214433210456276	0.0969984	0.31720908219058647	0.0546774	0.10456121841409784	0.5263552690835397	0.0749279	0.14632453294272332	0.4777629566175121	0.039876909074764696	0.19487335903295794	0.13355619048969494	0.0938521	0.0724919	0.070523	0.28123142307043925	0.12107072833086857	0.22620118608034015	0.13852380449083576	0.0447199	0.0728776	-1.06666	0.5318679597457351	0.16512349021471273	0.30980048085140327
-40	-0.099567	0.0875523	0.041862629229277186	0.025486073623698986	0.2056831190427416	0.18243776207492002	0.0833642	0.0678528	0.0730161	0.0735897	0.0724291	0.029440166995009818	0.053732689133918536	0.0314945	0.0563022	0.0232982	-0.000821467	0.051771959894821785	0.0866336	0.256302	0.1328639075087633	0.0845341	0.0344444	0.056991296633372594	0.0719621	0.30062150481385996	0.0575466	0.0749867	0.5046470389551903	0.0676546	0.0846047	0.45365722327602026	0.035257947078671636	0.18715233984952026	0.0790715	0.0861301	0.00453074	0.026941362961270417	0.2590766323298464	0.0755013	0.15107679683711908	0.0728006	0.050945225699269396	0.018782845830749358	0.549998	0.45880920992520846	0.1716229984639696	0.2929402961831945
-60	0.0411255	0.061318392723152065	0.025969499338393216	0.0509721	0.20309235181413954	0.17561417980081895	0.0718951	0.0750926	0.0484294	0.047393717899017335	0.0669628	0.028076036025747177	0.0360153	0.023671	0.049674826697029564	0.00584796	0.020628	0.046457981530435906	0.10148517501578073	0.23856224548177565	0.13051857204353975	0.030723836099831696	0.0422222	0.0514747	0.0665882	0.28127140704206055	0.028583749778037085	0.0632355	0.4785647939653232	0.0494031	0.0991679	0.46995288502722876	0.0372595	0.22174219410081183	0.0527143	0.11167254567157148	-0.0621359	0.0673535	0.2861534776012138	0.0829204	0.1645287382044683	0.12032356467831228	0.027014741938870674	0.039819586581921286	0.1	0.4026797018782713	0.11049097720265656	0.26975801703869984
-80	0.10606051149219031	0.047758908472811355	0.017037022494630582	0.031003589321059555	0.18604269343391133	0.15150123729700213	0.0726915	0.0550678	0.0479918	0.0437789	0.0813119	0.017338421859088442	0.021035183812097877	0.023871619667389727	0.0414369	0.013052636371607996	0.00301205	0.0360255	0.0321782	0.2507000302897721	0.11494988008117582	0.062315537230415004	0.0422222	0.0434966	0.0732732	0.159641	0.0375163	0.0529473	0.465602	0.028544	0.10471556624289478	0.42296518387077037	0.0177059	0.1176653935593609	0.0706136	0.0974162	-0.00927724	0.0768622	0.3409238112983222	0.0613987	0.1278975047555108	0.1951465298253159	0.023873459363426573	0.0999247	-0.183333	0.373168	0.11429259721746433	0.26975801703869984
-100	0.4177485293429245	0.0559371	0.014106752315623737	0.0754071	0.13363990745538457	0.14331195463408314	0.0447619	0.0499076	0.0360705	0.0484201	0.10727705976885518	0.022003115294446086	0.0288654	0.00401204	0.0209972	0.00598831	0.025739336414929842	0.022076297862212036	0.0631188	0.2637717497391714	0.11942838693807269	0.0423537	0.010740733818558529	0.034882298055891214	0.0625245	0.14858324303453774	0.024902580233495227	0.0371819	0.4309699392028823	0.030327999406425447	0.0908461	0.4153582573578903	0.016166311489966258	0.0945028	0.0611722	0.0686071	-0.0211435	0.050713184051182456	0.16000004436281687	0.0650123	0.16121741076423854	0.13346806083511614	0.030498582624645658	0.00976708	-0.75	0.36040228159711796	0.13317781485860786	0.36775636862235694
25 uM icilin
Voltage (mV)	Normalized Conductance (to 500 uM Ca at +160 mV)
160	1.6212310990525478	1.8402515365892926	1.723376795884532	1.9284400651412217	1.735771115537404	1.3120960526562762	1.5017139465288254	0.7184458253553234	2.273374842911002
140	1.3822869999175444	1.9232794461649192	1.6606018068307977	1.6475004523695942	1.5228926841998436	1.0362762702638444	1.2623846857764698	0.5984732213828995	2.1719496172740778
120	1.1332794100901906	1.3730905096078263	1.5136479844932003	1.2925334342254609	1.314352565403686	0.9262274055396704	1.2490737763707864	0.5228841817936398	1.5760682051867931
100	0.9308944845160454	1.3376234716973985	1.2656949771809307	1.154437334473853	1.215653166968155	0.8640859919038472	1.103197882917419	0.5090136930145128	1.4017422597966411
80	0.7573768174554251	1.13137	1.1824377620749198	0.9523547893602672	1.1166414992494385	0.7674014102572123	1.059011203719734	0.29680946262791896	1.2226608020107392
60	0.6206853225382142	0.8851796081105398	1.0427650513203575	0.7423335691138491	0.9508042049289475	0.7314692577692408	0.8443795909282023	0.463245	1.0935022278076088
40	0.5084320508239656	0.7385695750584803	0.8653322335137759	0.6667565922587226	0.814666	0.6130877375194739	0.822012	0.4181693654420109	1.0832000456986175
20	0.4221679499613245	0.7259577047286226	0.7875342122050453	0.5472816699840438	0.7747523593059592	0.5092861745991027	0.7340489204362773	0.26213449049887766	0.9873214897749343
0	0.32046858251237814	0.5691005862242047	0.599636	0.5052030728232798	0.8035268585040962	0.5158819738595624	0.6976825860064799	0.26005479205515203	1.0071318405118244
-20	0.2546840582213968	0.5869666922370277	0.5623297589197717	0.4324587521179121	0.6658417553102507	0.4579062623178522	0.7056414315039696	0.3065180548820421	0.8122015309036902
-40	0.2047714217281876	0.5110340843443096	0.5341220110954957	0.3366189074040566	0.6899757099107579	0.4138166415356412	0.6758637746395271	0.2864084707717381	0.8145807151833657
-60	0.16826800375368597	0.439043	0.43403132517870696	0.3308680561267293	0.467822	0.3556669940999443	0.6672173719486558	0.30305105759664847	0.872424
-80	0.149902	0.3851805551609512	0.35668755339891794	0.27373130891085856	0.498762	0.3636517778375639	0.6902727969727698	0.26768368586554947	0.7416799954301383
-100	0.1444552639948485	0.47398736634751065	0.3434946383796575	0.3208287410965439	0.47339131133024487	0.33310162736424553	0.7004278683253778	0.2732303815946688	0.8581600594082028

## Sheet: 3mM_Ca
0 uM icilin
Voltage (mV)	Normalized Conductance (to 500 uM Ca at +160 mV)
160	2.9224759158043447	1.8286918553028801	1.356240148615177	4.412653030940073	2.6282938973848795	1.4929719145811662	4.505477490676612	2.3486659089618813	2.6366955695619194	2.876156777354382	7.129155718039529	2.548311107562086	3.781425816572706	3.085616882515332
140	2.7552085670854853	1.793818094452163	1.33883	4.185398065936241	2.0832154337621045	1.4519586367252035	4.350587151482863	2.289990170617158	2.4840655951562245	2.8582549187339605	7.022192391180166	2.3563088361858626	3.561221772813146	2.8966129155112537
120	2.5344945001980586	1.7378383177862973	1.3087621031299257	3.9492246432369598	1.8300946362777397	1.4254078198617144	3.877452939087196	2.06269	2.3762717392074983	2.4716307644451354	5.197303781560607	2.1304599536852193	3.3056887197297247	2.7275160213851786
100	2.3367865233875733	1.6768810521147801	1.2360616978158074	3.5917394207701627	1.6047148163516292	1.383038609802362	3.5770677943526903	2.0679440782699396	2.2806794898154514	2.3300956528501438	4.524563006969038	2.12738	3.017397087690866	2.6500081316378354
80	1.9276761897699972	1.563276263697235	1.194987052465661	2.8207800558949376	1.5360597713331567	1.3331285565685616	3.107785029302078	1.758179371208925	2.086538529709955	2.31607	3.5768593625042837	1.9304612845697253	2.691125329804659	2.3948805678559446
60	1.645302289096206	1.440923002997984	1.1485631051564964	2.310142705216036	0.8120647506111613	1.2239417487609372	2.6886876220919906	1.556203921289241	1.8650662545109078	2.099673380511704	2.6767022735062267	1.7907694286956446	2.358963482598878	2.1658565908468637
40	1.2641836740667312	1.2430560633441623	1.0645800495383924	2.038013503821136	0.7926475661029151	1.1255510004283178	2.2542010744095187	1.2566359465985104	1.5576297262614591	1.8921222490084764	1.9088741003084657	1.2904611071184575	1.933171115739679	1.9783533742179733
20	1.0410363082542884	1.071303966322299	1.0254179801846433	1.6198699082432666	0.760055	1.0585327051336963	1.9361070413780854	1.120449457714173	1.368607627244819	1.6903958317131969	2.09905	0.9950757273283825	1.617250238888652	1.8433352478708491
0	0.7672696903056355	0.8811356822763786	0.9810248254897547	1.256894121138674	0.5214968829519719	0.9599363641926206	1.513319126265317	0.9231003854943689	1.1728927237020284	1.3969826580605025	1.0047526562321492	1.0793850426326672	1.3479890128509993	1.713002591830895
-20	0.5811506167154171	0.7194116848251874	0.8904807475793741	0.8030766947790171	0.30305105759664847	0.8447066022150156	1.2598950008879417	1.0525009267226744	0.9455146156954773	1.1365658293802008	0.9873214897749343	0.966153	1.0851273515691728	1.5264134124675508
-40	0.4684383372392301	0.5628270884039652	0.8080978383247017	0.6621373630450375	0.42926525653780206	0.805458	1.0902259811756347	0.8285969363049314	0.8054690989528313	1.0589003810560695	0.5673540500399863	0.7107699610494469	0.8733008360238323	1.314350590933327
-60	0.3106875874436311	0.4203032455526423	0.7683897207836073	0.4215729725719091	0.2170595263686765	0.7658030961267821	0.8526571656899307	0.7127849880945357	0.7401646259757386	0.8017264172952795	0.39936593168056667	0.6350759047796499	0.6829656542091086	1.1293609767846888
-80	0.2275885753981185	0.3307826096039945	0.7280187457779779	0.3455469542205624	0.31067995140704596	0.7167105182647004	0.6994650150950097	0.5898698358170243	0.5900855743121087	0.8323586593047669	0.46117331200731176	0.7101533178950732	0.5568105454499348	1.106973239706273
-100	0.2089105182126668	0.258332	0.6662505629362757	0.2542883288403037	0.2593623924530943	0.6731175426788227	0.559814	0.5302657050272339	0.5369777450069835	0.5978427560463488	0.2670364446475494	0.4270764016431987	0.44216704569948556	0.9416292508394116
25 uM icilin
Voltage (mV)	Normalized Conductance (to 500 uM Ca at +160 mV)
160	10.571410738527314	3.06978	4.408676081418643	2.176141959415885	3.623219475539545	3.069552534724992
140	10.642876090314727	2.965407408541721	4.062854598966191	2.1539501772243024	3.516824505762877	2.7818810937280416
120	9.35494	2.8989990250575524	4.0183909183093025	2.06311	3.3715757019879993	2.69547
100	9.290027618705823	2.840400389976979	3.9038013503821136	1.8848816921546374	3.310001878598345	2.1591177554190737
80	8.471842963471532	2.7453817843998998	3.6252269186060886	1.796809462627919	3.2171770192169564	1.8851464014007742
60	8.532463682182033	2.501339907814342	3.5214799792248903	1.6636612691159782	3.1266064778491156	1.6385714231454367
40	8.621171220372307	2.3283641894961433	3.216961392921623	1.5811357353183788	2.9627706010409645	1.4204449204848015
20	8.880974300560176	2.170152979189317	2.9101130264882644	1.4542291367751676	2.7888344954858386	1.5932589646881874
0	8.52809	1.9343930089990757	2.7258130734795833	1.3495143204235385	2.704827997745682	1.2750272520443782
-20	7.9523928409817914	1.70002	2.6290653673979176	1.4902914077458769	2.579492336423812	1.354060079838045
-40	7.554106136970057	1.5157547636913054	2.332510573046769	1.319001244819501	2.4678372912821986	1.0895690188884204
-60	7.33549	1.3134924888596233	2.248524719907007	1.2239925210844427	2.329263036919983	1.160169855250814
-80	7.352801660243107	1.1675982216233045	1.9864170355897413	1.1789165570992206	2.164814958063055	0.9420471507845171
-100	7.157996161468005	1.072824627760848	1.8633195657012838	1.0305130756040375	2.1090802603516297	1.0748168320780302
