# Supplementary material for: Conservation of the cooling agent binding pocket within the TRPM subfamily
Source: eLife. 2024 Nov 1;13:RP99643. doi: 10.7554/eLife.99643 (PMC11530238; doi:10.7554/eLife.99643)
Supplement: Figure 4—figure supplement 1—source data 1. [file elife-99643-fig4-figsupp1-data1.xlsx]

## Sheet: A_External Only
External solution, 0 uM Icilin, 0 uM PregS
-160 mV	-140 mV	-120 mV	-100 mV	-80 mV	-60 mV	-40 mV	-20 mV	0 mV	20 mV	40 mV	60 mV	80 mV	100 mV	120 mV	140 mV	160 mV
pA	pA	pA	pA	pA	pA	pA	pA	pA	pA	pA	pA	pA	pA	pA	pA	pA
-5.79834	-9.76563	-7.01904	-5.18799	-7.01904	-7.01904	-8.23975	-6.10352	-4.57764	-3.66211	-4.27246	-7.32422	-5.49316	-3.96729	-6.40869	-4.27246	-5.79834
-6.10352	-8.54492	-4.88281	-7.62939	-7.01904	-7.32422	-7.62939	-7.01904	-6.10352	-3.66211	-2.74658	-8.54492	-5.18799	-4.27246	-5.18799	-8.8501	-6.40869
-5.18799	-6.40869	-5.18799	-7.62939	-6.71387	-6.40869	-8.23975	-4.27246	-8.8501	-5.79834	-7.01904	-7.01904	-4.57764	-5.49316	-5.18799	-7.01904	-6.40869
-6.10352	-6.71387	-5.18799	-7.62939	-5.79834	-7.01904	-6.40869	-6.40869	-5.49316	-7.32422	-4.27246	-4.57764	-7.01904	-2.74658	-6.10352	-4.88281	-3.66211
-4.27246	-7.93457	-6.10352	-8.54492	-8.8501	-6.40869	-3.66211	-8.8501	-6.40869	-7.93457	-2.13623	-5.18799	-7.62939	-2.74658	-7.62939	-4.88281	-5.79834
-4.57764	-5.79834	-4.57764	-4.27246	-5.79834	-7.32422	-6.40869	-5.49316	-6.40869	-4.57764	-4.27246	-6.10352	-6.10352	-4.27246	-5.49316	-6.10352	-5.49316
-7.32422	-8.23975	-3.96729	-6.10352	-5.49316	-7.32422	-7.32422	-5.79834	-3.96729	-6.40869	-6.40869	-5.49316	-5.79834	-4.27246	-5.18799	-6.40869	-4.57764
-6.71387	-11.9019	-4.27246	-9.76563	-8.23975	-4.88281	-3.96729	-6.10352	-7.01904	-4.27246	-4.57764	-6.71387	-6.40869	-3.96729	-7.32422	-7.32422	-6.10352
-4.57764	-6.71387	-6.10352	-7.01904	-4.57764	-5.18799	-4.57764	-5.18799	-8.54492	-5.18799	-5.79834	-6.71387	-5.79834	-3.05176	-3.35693	-6.71387	-7.32422
-5.49316	-7.62939	-6.40869	-7.93457	-5.49316	-8.23975	-8.8501	-4.27246	-4.57764	-3.66211	-8.23975	-3.96729	-7.01904	-4.88281	-5.49316	-5.18799	-5.18799
-5.18799	-9.15527	-4.57764	-8.8501	-7.32422	-6.40869	-7.01904	-7.01904	-5.18799	-5.49316	-4.88281	-5.79834	-7.62939	-3.96729	-7.32422	-4.88281	-5.79834
-5.18799	-6.10352	-6.10352	-8.23975	-8.23975	-5.18799	-5.49316	-6.71387	-10.0708	-5.49316	-6.71387	-6.71387	-7.32422	-5.49316	-5.79834	-8.23975	-5.49316
-5.49316	-7.93457	-7.32422	-7.62939	-8.8501	-7.01904	-8.8501	-5.79834	-7.01904	-6.40869	-8.54492	-5.79834	-7.32422	-5.18799	-4.88281	-5.18799	-2.13623
-5.79834	-8.8501	-4.88281	-8.54492	-10.6812	-6.40869	-4.88281	-8.54492	-7.62939	-7.62939	-6.71387	-5.79834	-7.01904	-3.05176	-6.10352	-5.49316	-3.35693
-5.18799	-8.54492	-4.27246	-7.93457	-8.54492	-5.79834	-4.88281	-6.71387	-7.32422	-5.79834	-6.10352	-6.71387	-7.01904	-3.35693	-3.96729	-8.8501	-5.49316
-5.18799	-7.32422	-4.57764	-6.40869	-7.01904	-6.40869	-7.93457	-5.79834	-5.49316	-6.40869	-10.0708	-5.49316	-6.71387	-4.57764	-1.83105	-6.71387	-3.35693
-3.66211	-9.46045	-4.88281	-7.93457	-8.8501	-5.49316	-8.54492	-7.01904	-4.88281	-5.18799	-8.54492	-7.01904	-7.32422	-7.62939	-8.23975	-5.79834	-5.18799
-4.27246	-7.32422	-5.49316	-6.10352	-9.15527	-5.79834	-7.62939	-7.01904	-7.01904	-4.88281	-6.71387	-5.18799	-7.32422	-6.71387	-6.10352	-8.23975	-6.10352
-5.49316	-5.79834	-7.01904	-5.18799	-6.40869	-6.40869	-9.76563	-5.18799	-6.10352	-5.18799	-8.54492	-4.88281	-7.93457	-6.10352	-4.88281	-8.23975	-4.88281
-6.40869	-9.46045	-6.10352	-8.54492	-7.32422	-7.32422	-8.23975	-7.01904	-3.96729	-6.40869	-5.18799	-6.10352	-6.71387	-4.27246	-7.01904	-7.32422	-5.49316
-4.88281	-7.62939	-6.40869	-8.54492	-10.376	-5.49316	-5.49316	-8.54492	-4.57764	-4.88281	-5.79834	-7.62939	-7.01904	-5.49316	-7.93457	-8.8501	-7.62939
-6.71387	-4.27246	-5.79834	-6.10352	-4.88281	-7.62939	-7.62939	-7.01904	-5.79834	-4.88281	-10.376	-7.93457	-6.40869	-6.71387	-6.71387	-7.32422	-3.96729
-7.93457	-9.15527	-5.49316	-5.79834	-7.32422	-7.01904	-7.93457	-9.15527	-6.10352	-6.71387	-8.8501	-6.71387	-4.57764	-6.40869	-6.10352	-5.18799	-4.57764
-7.01904	-9.46045	-7.01904	-7.01904	-8.54492	-6.71387	-5.18799	-8.8501	-5.79834	-7.01904	-6.71387	-7.01904	-5.79834	-4.57764	-6.40869	-7.32422	-7.32422
-4.88281	-6.71387	-8.23975	-5.49316	-6.40869	-8.23975	-5.79834	-4.27246	-4.57764	-7.01904	-7.62939	-5.18799	-4.27246	-3.35693	-4.27246	-5.79834	-6.10352
-5.49316	-9.76563	-5.79834	-7.62939	-7.01904	-8.8501	-6.71387	-4.27246	-5.49316	-6.40869	-7.62939	-5.18799	-7.01904	-4.88281	-5.79834	-2.74658	-4.88281
-7.01904	-10.376	-2.74658	-6.40869	-9.46045	-6.10352	-6.10352	-7.01904	-8.8501	-6.10352	-3.35693	-6.10352	-6.10352	-4.88281	-7.62939	-5.79834	-7.01904
-5.79834	-7.62939	-4.27246	-5.18799	-7.01904	-5.49316	-5.79834	-7.93457	-6.71387	-5.79834	-7.01904	-4.88281	-8.23975	-5.49316	-5.79834	-5.79834	-5.79834
-6.40869	-8.23975	-5.49316	-8.23975	-5.79834	-8.54492	-7.01904	-7.32422	-2.74658	-4.57764	-7.62939	-6.10352	-7.62939	-5.49316	-5.79834	-5.79834	-2.74658
-5.49316	-8.23975	-4.27246	-9.15527	-8.54492	-7.01904	-3.66211	-7.32422	-5.18799	-5.79834	-5.79834	-7.62939	-7.93457	-3.35693	-5.49316	-7.01904	-6.71387
-3.66211	-5.18799	-5.49316	-5.49316	-7.93457	-5.18799	-5.18799	-6.40869	-7.62939	-7.01904	-7.93457	-8.54492	-8.8501	-4.88281	-3.66211	-7.62939	-8.8501
-6.40869	-7.01904	-4.27246	-3.66211	-3.66211	-7.93457	-8.54492	-6.10352	-7.01904	-6.40869	-8.54492	-6.40869	-6.40869	-5.49316	-7.01904	-8.23975	-5.18799
-5.18799	-8.54492	-4.57764	-7.62939	-8.54492	-8.23975	-5.18799	-7.93457	-6.10352	-6.10352	-6.71387	-4.57764	-7.01904	-5.49316	-10.376	-7.01904	-7.32422
-4.27246	-5.18799	-6.40869	-4.57764	-7.01904	-6.10352	-4.57764	-7.93457	-5.79834	-7.01904	-5.18799	-5.79834	-7.01904	-6.71387	-6.10352	-8.8501	-6.40869
-4.88281	-6.71387	-7.62939	-5.18799	-3.66211	-6.40869	-6.71387	-7.62939	-3.96729	-6.40869	-9.15527	-6.10352	-7.01904	-6.71387	-6.71387	-5.79834	-4.57764
-5.18799	-8.23975	-7.32422	-6.71387	-6.40869	-6.71387	-8.8501	-7.62939	-5.49316	-4.88281	-5.49316	-7.01904	-8.54492	-6.40869	-8.54492	-3.05176	-7.62939
-3.35693	-7.01904	-6.10352	-6.10352	-9.15527	-4.57764	-7.01904	-6.10352	-8.23975	-4.57764	-5.79834	-6.40869	-9.15527	-6.40869	-5.49316	-6.10352	-9.46045
-5.49316	-7.93457	-7.32422	-4.88281	-7.32422	-6.10352	-9.15527	-4.88281	-4.88281	-3.66211	-8.54492	-6.10352	-8.23975	-5.49316	-5.79834	-6.40869	-6.10352
-6.10352	-10.376	-7.62939	-8.23975	-7.32422	-6.71387	-6.71387	-7.32422	-4.57764	-4.88281	-8.23975	-6.10352	-6.10352	-5.18799	-7.93457	-4.27246	-4.88281
-6.10352	-7.32422	-5.79834	-7.93457	-7.01904	-5.79834	-4.27246	-9.46045	-6.10352	-8.54492	-7.01904	-5.18799	-6.40869	-7.01904	-4.27246	-7.01904	-7.01904
-5.79834	-5.79834	-5.79834	-4.57764	-5.49316	-6.71387	-5.79834	-9.15527	-6.40869	-7.62939	-8.23975	-4.57764	-4.27246	-5.79834	-1.2207	-6.40869	-3.96729
-6.40869	-7.01904	-5.49316	-7.01904	-6.10352	-7.62939	-7.01904	-9.15527	-7.01904	-5.79834	-8.54492	-5.79834	-7.32422	-5.49316	-3.66211	-4.57764	-3.35693
-6.10352	-6.10352	-6.71387	-5.49316	-7.93457	-3.96729	-5.18799	-7.32422	-7.32422	-4.57764	-5.49316	-8.54492	-8.54492	-4.27246	-3.35693	-6.71387	-8.8501
-5.79834	-6.10352	-4.88281	-3.35693	-6.10352	-5.18799	-6.40869	-4.27246	-7.62939	-4.57764	-8.8501	-7.62939	-6.10352	-7.01904	-2.44141	-6.40869	-6.71387
-6.10352	-8.54492	-4.57764	-7.93457	-4.57764	-5.79834	-8.23975	-4.27246	-5.18799	-5.49316	-8.23975	-7.62939	-6.71387	-7.32422	-5.49316	-6.71387	-5.79834
-7.01904	-6.40869	-2.13623	-9.15527	-8.54492	-3.35693	-5.49316	-6.71387	-4.88281	-5.18799	-6.10352	-6.40869	-5.18799	-5.79834	-5.18799	-7.93457	-8.23975
-6.71387	-5.18799	-4.57764	-6.40869	-7.93457	-6.10352	-7.01904	-4.57764	-5.18799	-4.27246	-8.54492	-5.79834	-4.88281	-5.18799	-2.74658	-8.54492	-6.10352
-5.49316	-7.62939	-5.49316	-6.40869	-6.10352	-7.01904	-9.15527	-6.10352	-5.49316	-3.96729	-8.8501	-6.10352	-6.10352	-5.49316	-6.40869	-6.10352	-4.88281
-3.35693	-8.54492	-7.01904	-8.8501	-7.32422	-5.18799	-7.93457	-8.23975	-7.32422	-5.49316	-5.79834	-4.57764	-9.15527	-5.18799	-5.79834	-7.32422	-6.40869
-4.27246	-3.35693	-5.79834	-5.18799	-7.62939	-4.27246	-7.62939	-6.10352	-6.40869	-9.15527	-7.93457	-6.71387	-5.79834	-4.57764	-3.66211	-8.8501	-6.71387
-7.32422	-7.01904	-4.88281	-5.49316	-4.88281	-6.10352	-10.6812	-7.32422	-7.93457	-7.93457	-10.0708	-6.10352	-6.10352	-5.79834	-4.27246	-6.10352	-4.27246
-6.71387	-7.93457	-5.49316	-6.71387	-7.62939	-7.32422	-7.62939	-7.62939	-7.62939	-5.49316	-6.71387	-7.32422	-8.23975	-4.88281	-5.49316	-7.32422	-7.62939
-5.79834	-3.66211	-4.88281	-4.88281	-7.01904	-7.01904	-6.10352	-4.57764	-7.62939	-5.79834	-7.93457	-6.10352	-6.40869	-5.18799	-2.74658	-9.15527	-7.93457
-7.93457	-4.88281	-6.71387	-4.88281	-6.10352	-9.15527	-8.23975	-4.88281	-6.10352	-5.49316	-8.23975	-4.57764	-5.49316	-5.79834	-4.57764	-5.18799	-6.10352
-7.93457	-7.01904	-7.01904	-7.01904	-8.8501	-9.15527	-7.01904	-6.40869	-7.32422	-4.57764	-4.57764	-6.10352	-5.18799	-4.57764	-6.40869	-5.49316	-7.01904
-6.40869	-4.88281	-6.71387	-7.01904	-7.01904	-7.01904	-7.93457	-6.10352	-7.32422	-4.27246	-4.27246	-6.40869	-3.66211	-6.40869	-3.96729	-7.01904	-7.32422
-6.71387	-5.18799	-6.40869	-5.18799	-4.88281	-7.01904	-9.15527	-5.49316	-5.79834	-6.71387	-5.79834	-5.49316	-3.96729	-5.79834	-4.88281	-7.32422	-4.88281
-7.62939	-6.10352	-4.57764	-9.46045	-6.40869	-7.32422	-6.71387	-6.10352	-4.88281	-6.71387	-6.10352	-5.49316	-6.40869	-6.40869	-7.01904	-7.32422	-5.79834
-6.40869	-3.66211	-3.66211	-6.10352	-8.54492	-6.71387	-4.27246	-4.88281	-5.79834	-6.71387	-7.93457	-8.54492	-6.40869	-3.96729	-4.27246	-8.23975	-7.01904
-6.71387	-4.88281	-3.96729	-3.66211	-7.93457	-8.23975	-5.79834	-5.79834	-6.40869	-5.79834	-8.23975	-7.32422	-3.35693	-5.49316	-3.35693	-7.01904	-4.27246
-6.40869	-5.49316	-6.71387	-7.01904	-8.23975	-6.10352	-6.10352	-6.10352	-4.57764	-4.27246	-4.88281	-6.71387	-2.44141	-5.49316	-5.49316	-4.27246	-3.96729
-4.57764	-5.18799	-5.49316	-7.62939	-9.15527	-2.74658	-3.66211	-4.57764	-7.01904	-5.49316	-5.79834	-6.71387	-4.57764	-6.10352	-4.27246	-3.96729	-8.23975
-3.96729	-6.71387	-5.18799	-5.49316	-6.10352	-5.79834	-10.376	-5.18799	-8.23975	-5.49316	-9.15527	-5.79834	-4.88281	-7.93457	-3.96729	-7.62939	-7.32422
-4.57764	-7.32422	-6.40869	-7.32422	-8.54492	-6.71387	-8.23975	-7.32422	-7.01904	-7.62939	-9.15527	-6.40869	-4.57764	-6.10352	-7.93457	-4.88281	-5.18799
-4.57764	-7.32422	-6.71387	-8.54492	-9.76563	-4.57764	-6.71387	-7.01904	-8.54492	-6.40869	-8.54492	-6.71387	-7.01904	-5.18799	-7.01904	-6.71387	-6.10352
-5.49316	-4.88281	-4.27246	-4.88281	-7.01904	-6.71387	-10.9863	-5.79834	-8.54492	-7.62939	-9.15527	-4.88281	-4.57764	-5.18799	-3.66211	-8.8501	-5.79834
-4.88281	-8.23975	-6.40869	-7.01904	-5.79834	-9.46045	-10.376	-7.32422	-10.0708	-8.8501	-7.62939	-3.66211	-4.57764	-7.93457	-6.40869	-5.79834	-3.66211
-3.05176	-9.15527	-7.62939	-6.10352	-8.8501	-7.62939	-8.23975	-7.32422	-8.23975	-7.32422	-3.66211	-4.88281	-7.32422	-5.49316	-6.40869	-6.10352	-8.23975
-3.66211	-7.32422	-6.71387	-4.88281	-7.01904	-7.32422	-8.23975	-6.71387	-7.62939	-5.18799	-6.40869	-6.40869	-8.23975	-4.57764	-3.96729	-6.10352	-7.32422
-5.79834	-8.54492	-7.93457	-7.32422	-7.32422	-8.23975	-10.6812	-7.32422	-4.57764	-4.57764	-5.49316	-7.01904	-8.23975	-4.88281	-4.88281	-4.88281	-3.05176
-2.74658	-6.40869	-7.93457	-7.32422	-7.62939	-5.79834	-7.93457	-7.32422	-5.79834	-6.40869	-4.88281	-7.01904	-6.71387	-4.27246	-6.40869	-5.49316	-5.49316
-1.52588	-4.27246	-7.93457	-6.10352	-7.32422	-7.62939	-9.15527	-5.49316	-6.40869	-6.40869	-8.8501	-5.79834	-6.40869	-5.49316	-3.35693	-7.93457	-6.40869
-3.66211	-6.10352	-7.01904	-6.40869	-7.01904	-8.8501	-8.8501	-6.10352	-7.32422	-8.23975	-9.76563	-4.88281	-3.96729	-6.40869	-4.57764	-6.40869	-5.49316
-3.05176	-6.10352	-6.10352	-9.76563	-10.0708	-6.71387	-6.10352	-9.76563	-9.15527	-8.8501	-6.10352	-8.54492	-5.49316	-7.01904	-6.10352	-3.66211	-6.40869
-5.18799	-3.35693	-4.57764	-4.27246	-8.54492	-6.71387	-6.10352	-6.71387	-7.93457	-5.18799	-6.10352	-6.71387	-8.23975	-6.10352	-4.57764	-5.79834	-6.40869
-6.40869	-6.40869	-6.40869	-4.88281	-5.79834	-8.23975	-8.54492	-4.88281	-6.71387	-7.93457	-8.54492	-5.18799	-7.01904	-6.40869	-6.10352	-4.57764	-2.74658
-5.18799	-8.23975	-6.71387	-7.93457	-7.62939	-7.62939	-7.01904	-5.18799	-6.40869	-6.71387	-4.57764	-5.79834	-7.93457	-5.49316	-7.62939	-5.18799	-5.49316
-2.44141	-5.49316	-6.10352	-5.18799	-7.32422	-6.71387	-6.10352	-6.71387	-7.32422	-6.71387	-4.27246	-6.71387	-5.18799	-7.62939	-1.83105	-5.49316	-8.23975
-3.05176	-5.49316	-7.93457	-6.71387	-8.23975	-6.71387	-9.46045	-7.01904	-7.32422	-5.49316	-7.32422	-4.27246	-6.10352	-9.46045	-4.27246	-4.88281	-5.49316
-3.66211	-8.54492	-6.71387	-8.23975	-11.2915	-5.79834	-7.01904	-8.23975	-8.54492	-5.49316	-6.40869	-6.10352	-6.40869	-5.79834	-6.71387	-4.57764	-4.27246
-3.66211	-6.10352	-7.32422	-5.79834	-10.376	-6.71387	-6.40869	-5.79834	-5.49316	-6.71387	-6.71387	-4.57764	-7.32422	-6.10352	-5.49316	-4.57764	-6.71387
-3.96729	-4.88281	-6.40869	-5.49316	-7.32422	-8.54492	-11.2915	-6.10352	-5.18799	-7.01904	-7.01904	-6.10352	-6.71387	-4.27246	-5.79834	-5.18799	-6.40869
-4.27246	-5.18799	-7.93457	-8.8501	-8.8501	-9.46045	-11.2915	-6.71387	-4.57764	-7.01904	-5.49316	-8.8501	-5.49316	-4.88281	-7.62939	-3.66211	-5.79834
-0.91553	-3.05176	-4.88281	-6.71387	-8.8501	-7.62939	-8.8501	-6.40869	-4.57764	-5.49316	-3.66211	-7.93457	-4.57764	-4.88281	-6.10352	-7.93457	-7.93457
-3.66211	-3.35693	-3.05176	-3.96729	-4.57764	-7.62939	-9.15527	-6.71387	-6.10352	-7.32422	-6.71387	-5.49316	-4.27246	-6.71387	-5.18799	-7.62939	-5.49316
-5.49316	-6.71387	-5.79834	-9.15527	-6.10352	-6.40869	-8.23975	-6.71387	-5.18799	-7.32422	-6.71387	-7.01904	-7.62939	-8.8501	-8.54492	-6.71387	-7.01904
-3.66211	-6.10352	-3.66211	-9.46045	-7.62939	-5.49316	-6.40869	-6.10352	-5.49316	-6.40869	-3.05176	-7.93457	-7.62939	-6.40869	-5.79834	-7.62939	-8.23975
-5.79834	-5.79834	-2.13623	-6.40869	-6.40869	-7.01904	-8.23975	-4.88281	-5.18799	-5.49316	-5.18799	-4.57764	-6.10352	-7.62939	-5.49316	-8.23975	-5.49316
-5.79834	-8.54492	-4.57764	-6.10352	-4.57764	-8.54492	-7.93457	-5.49316	-6.10352	-7.01904	-4.27246	-6.10352	-5.49316	-5.49316	-7.62939	-6.71387	-4.27246
-3.05176	-5.18799	-4.27246	-5.79834	-7.93457	-6.71387	-5.49316	-4.88281	-5.18799	-6.40869	-5.49316	-7.01904	-6.10352	-7.93457	-6.40869	-6.10352	-7.93457
-5.49316	-3.05176	-3.05176	-4.88281	-6.10352	-6.71387	-9.15527	-6.10352	-5.49316	-7.32422	-7.62939	-3.66211	-5.79834	-7.93457	-3.96729	-7.93457	-7.93457
-8.8501	-3.66211	-4.88281	-8.23975	-4.57764	-8.54492	-7.62939	-5.79834	-5.49316	-7.32422	-7.32422	-3.66211	-6.40869	-7.62939	-4.88281	-5.49316	-5.49316
-3.96729	-5.18799	-7.62939	-9.15527	-6.40869	-5.79834	-4.88281	-6.10352	-4.57764	-5.79834	-4.57764	-7.32422	-7.01904	-7.32422	-5.49316	-5.79834	-6.40869
-2.44141	-3.96729	-6.40869	-6.71387	-5.18799	-4.88281	-4.88281	-5.79834	-4.88281	-6.40869	-6.71387	-3.96729	-3.96729	-5.49316	-2.74658	-6.10352	-8.23975
-3.96729	-4.88281	-7.01904	-6.71387	-5.79834	-8.54492	-8.54492	-4.27246	-6.40869	-6.40869	-7.93457	-4.57764	-5.79834	-8.23975	-5.49316	-6.40869	-5.18799
-3.96729	-7.01904	-7.01904	-6.71387	-8.23975	-6.71387	-5.18799	-4.57764	-7.93457	-7.01904	-3.05176	-7.01904	-6.71387	-6.10352	-5.49316	-5.49316	-3.35693
-3.05176	-3.96729	-4.57764	-4.27246	-6.71387	-6.71387	-5.49316	-6.10352	-6.40869	-4.27246	-3.96729	-4.57764	-7.01904	-6.40869	-3.05176	-6.40869	-4.88281
-4.88281	-7.01904	-5.18799	-5.18799	-4.27246	-8.23975	-9.46045	-4.88281	-5.18799	-5.79834	-5.18799	-3.96729	-5.79834	-5.49316	-3.05176	-5.79834	-5.49316
-6.10352	-7.93457	-4.88281	-9.46045	-6.71387	-7.32422	-6.10352	-4.88281	-5.79834	-7.01904	-4.27246	-6.71387	-7.32422	-7.01904	-5.18799	-4.27246	-6.40869
-3.66211	-5.79834	-4.88281	-4.88281	-6.40869	-7.93457	-6.10352	-4.27246	-6.10352	-5.49316	-3.35693	-5.79834	-6.71387	-5.18799	-3.35693	-6.40869	-7.01904
-5.49316	-5.79834	-6.10352	-3.96729	-3.96729	-9.15527	-8.23975	-4.57764	-8.8501	-7.62939	-6.40869	-4.57764	-6.10352	-5.49316	-3.35693	-4.27246	-6.10352
-5.49316	-9.15527	-6.40869	-8.54492	-6.71387	-6.40869	-7.93457	-4.27246	-7.32422	-7.93457	-4.88281	-8.23975	-6.71387	-5.49316	-6.10352	-2.74658	-6.10352
-3.66211	-5.79834	-3.35693	-6.40869	-8.54492	-5.79834	-4.88281	-5.18799	-4.57764	-6.71387	-4.88281	-7.62939	-2.74658	-4.27246	-2.74658	-4.57764	-7.32422
-7.62939	-4.27246	-4.57764	-5.18799	-4.57764	-7.01904	-7.32422	-6.10352	-3.96729	-7.32422	-6.40869	-6.10352	-3.66211	-5.18799	-3.35693	-5.49316	-4.27246
-10.0708	-7.62939	-8.23975	-6.10352	-6.40869	-7.01904	-5.79834	-5.49316	-6.71387	-5.79834	-3.35693	-8.23975	-4.88281	-4.88281	-4.88281	-4.57764	-2.44141
-5.49316	-6.10352	-5.49316	-6.71387	-9.46045	-5.18799	-6.40869	-6.10352	-7.32422	-6.10352	-4.57764	-7.93457	-5.79834	-6.40869	-1.52588	-6.71387	-7.62939
-6.10352	-6.71387	-5.49316	-5.18799	-6.40869	-8.23975	-8.54492	-7.32422	-5.79834	-7.62939	-7.32422	-3.66211	-7.93457	-4.27246	-2.13623	-6.40869	-5.79834
-7.32422	-8.23975	-5.18799	-7.32422	-5.79834	-7.93457	-6.71387	-5.49316	-6.10352	-6.71387	-5.79834	-5.79834	-6.40869	-4.88281	-5.79834	-3.05176	-4.88281
-4.88281	-7.01904	-7.01904	-6.10352	-9.15527	-4.88281	-3.66211	-6.71387	-6.10352	-6.10352	-4.27246	-7.01904	-4.88281	-5.79834	-4.88281	-5.79834	-6.10352
-4.88281	-6.10352	-7.93457	-1.83105	-6.71387	-6.40869	-6.40869	-7.32422	-7.32422	-7.93457	-7.01904	-5.79834	-3.66211	-2.74658	-4.57764	-5.18799	-6.10352
-7.93457	-8.8501	-7.62939	-4.27246	-7.93457	-5.49316	-5.18799	-5.49316	-7.01904	-7.62939	-5.79834	-6.10352	-5.79834	-3.35693	-7.01904	-5.49316	-5.49316
-6.10352	-7.93457	-7.62939	-7.01904	-9.76563	-5.49316	-3.35693	-4.57764	-6.10352	-5.79834	-2.74658	-6.40869	-5.49316	-2.74658	-6.40869	-3.96729	-7.01904
-4.57764	-6.40869	-4.88281	-4.88281	-8.54492	-8.23975	-7.32422	-3.66211	-4.88281	-5.18799	-5.79834	-5.18799	-5.79834	-5.49316	-3.66211	-6.10352	-5.18799
-6.40869	-7.01904	-7.01904	-5.18799	-6.71387	-8.23975	-9.15527	-3.96729	-6.71387	-7.62939	-7.32422	-5.49316	-5.18799	-4.88281	-4.57764	-4.57764	-4.27246
-5.49316	-6.10352	-8.54492	-7.62939	-8.54492	-6.10352	-7.62939	-5.18799	-7.01904	-6.10352	-4.88281	-6.40869	-5.49316	-4.27246	-6.10352	-4.88281	-7.93457
-3.66211	-4.27246	-9.15527	-4.27246	-7.01904	-7.62939	-8.23975	-6.40869	-8.54492	-7.32422	-7.32422	-6.40869	-4.57764	-3.96729	-4.27246	-6.40869	-7.32422
-7.01904	-7.01904	-7.93457	-6.10352	-8.23975	-7.62939	-8.23975	-8.8501	-6.10352	-7.32422	-7.01904	-5.79834	-6.10352	-4.27246	-5.18799	-3.96729	-4.88281
-6.71387	-9.76563	-7.32422	-7.62939	-10.376	-6.40869	-7.32422	-6.71387	-6.71387	-4.57764	-3.66211	-6.40869	-7.93457	-3.35693	-5.49316	-4.27246	-5.79834
-4.88281	-7.93457	-5.79834	-5.18799	-6.10352	-7.93457	-7.32422	-7.01904	-6.71387	-6.10352	-6.10352	-3.66211	-8.23975	-3.96729	-3.66211	-6.10352	-3.96729
-6.71387	-7.32422	-7.32422	-6.10352	-5.18799	-10.9863	-6.10352	-6.40869	-7.32422	-7.93457	-7.93457	-4.57764	-7.01904	-7.01904	-5.18799	-4.88281	-3.05176
-5.79834	-7.32422	-8.8501	-9.46045	-7.32422	-7.32422	-3.96729	-4.88281	-7.32422	-7.32422	-6.10352	-7.32422	-5.79834	-5.79834	-7.62939	-2.44141	-5.18799
-4.57764	-7.93457	-7.01904	-6.71387	-7.62939	-5.79834	-5.79834	-4.57764	-6.40869	-6.10352	-5.79834	-6.71387	-6.10352	-3.96729	-4.27246	-5.49316	-6.40869
-7.01904	-8.23975	-7.93457	-4.88281	-4.88281	-7.62939	-10.376	-4.57764	-8.54492	-7.93457	-8.54492	-7.93457	-6.71387	-5.18799	-3.96729	-6.71387	-3.66211
-7.62939	-8.8501	-7.01904	-3.96729	-7.32422	-5.79834	-7.01904	-7.62939	-8.54492	-6.71387	-6.71387	-7.93457	-7.01904	-6.10352	-3.05176	-4.57764	-6.40869
-4.27246	-7.93457	-5.79834	-4.27246	-7.01904	-7.32422	-6.71387	-8.8501	-7.62939	-6.10352	-5.18799	-5.79834	-8.23975	-7.01904	-3.96729	-6.71387	-7.01904
-6.10352	-8.54492	-8.54492	-3.96729	-3.96729	-8.8501	-9.15527	-7.93457	-6.10352	-5.49316	-7.62939	-5.49316	-6.40869	-7.01904	-3.35693	-6.71387	-5.18799
-7.01904	-8.8501	-9.46045	-5.18799	-5.79834	-7.32422	-8.8501	-7.01904	-6.10352	-5.49316	-6.40869	-7.32422	-7.01904	-7.01904	-5.79834	-3.96729	-5.49316
-5.18799	-7.01904	-6.40869	-6.71387	-9.15527	-4.57764	-7.01904	-6.10352	-9.15527	-6.10352	-6.10352	-8.8501	-6.10352	-5.79834	-4.88281	-3.05176	-6.40869
-7.32422	-5.49316	-5.79834	-7.32422	-7.93457	-8.23975	-8.8501	-4.88281	-8.8501	-8.54492	-10.0708	-6.40869	-5.49316	-7.32422	-4.27246	-5.49316	-3.35693
-7.32422	-7.32422	-8.23975	-6.71387	-10.376	-7.32422	-8.54492	-5.18799	-7.01904	-8.23975	-7.62939	-8.54492	-5.79834	-6.71387	-6.10352	-6.40869	-2.13623
-5.49316	-5.79834	-6.10352	-6.40869	-10.376	-5.49316	-5.79834	-6.71387	-8.8501	-6.40869	-4.57764	-7.62939	-8.23975	-4.57764	-3.96729	-5.18799	-7.01904
-7.01904	-4.57764	-4.27246	-5.79834	-3.66211	-8.23975	-7.32422	-5.79834	-7.32422	-5.18799	-7.01904	-4.88281	-7.32422	-4.88281	-6.10352	-5.79834	-5.79834
-10.0708	-8.23975	-7.32422	-7.62939	-5.49316	-6.71387	-6.40869	-4.88281	-6.71387	-5.49316	-8.23975	-7.01904	-7.01904	-6.71387	-6.71387	-5.18799	-3.05176
-6.40869	-7.93457	-6.40869	-7.93457	-9.76563	-5.79834	-6.40869	-6.71387	-7.62939	-4.57764	-5.79834	-7.32422	-7.01904	-7.62939	-4.57764	-4.57764	-8.8501
-7.01904	-5.79834	-4.88281	-6.71387	-5.79834	-6.10352	-8.23975	-10.0708	-9.46045	-6.40869	-8.23975	-7.01904	-5.79834	-5.49316	-3.96729	-5.49316	-8.23975
-8.8501	-8.54492	-5.79834	-7.32422	-5.18799	-7.01904	-10.0708	-7.93457	-8.8501	-5.79834	-7.93457	-6.10352	-4.88281	-7.01904	-4.57764	-3.96729	-3.35693
-6.71387	-7.62939	-5.79834	-6.71387	-8.54492	-4.57764	-6.40869	-7.01904	-9.46045	-4.57764	-7.32422	-7.32422	-5.79834	-7.62939	-4.27246	-5.18799	-5.18799
-5.79834	-7.32422	-4.57764	-6.40869	-8.23975	-6.10352	-6.71387	-7.62939	-9.76563	-5.49316	-8.54492	-4.57764	-6.10352	-6.10352	-3.96729	-6.10352	-7.32422
-7.93457	-6.71387	-8.23975	-5.79834	-7.01904	-7.93457	-8.8501	-5.49316	-8.23975	-5.79834	-8.54492	-5.79834	-7.01904	-6.71387	-4.57764	-4.88281	-6.40869
-7.93457	-7.93457	-7.01904	-5.18799	-8.23975	-5.18799	-6.10352	-5.79834	-7.62939	-6.10352	-6.10352	-7.32422	-8.23975	-6.71387	-2.74658	-5.49316	-6.10352
-7.01904	-5.79834	-5.18799	-4.88281	-8.8501	-6.10352	-8.8501	-8.54492	-6.71387	-5.79834	-7.93457	-6.40869	-5.79834	-6.71387	-4.57764	-7.32422	-7.62939
-8.8501	-6.71387	-7.32422	-5.79834	-4.88281	-7.62939	-12.207	-8.23975	-7.62939	-7.32422	-7.62939	-3.96729	-5.49316	-3.96729	-5.79834	-4.88281	-5.49316
-8.54492	-7.93457	-6.71387	-7.32422	-6.71387	-5.18799	-8.23975	-5.49316	-7.62939	-7.01904	-5.18799	-5.79834	-7.01904	-4.88281	-6.40869	-5.79834	-5.79834
-3.05176	-7.01904	-4.88281	-6.40869	-6.71387	-6.10352	-6.40869	-4.88281	-7.32422	-8.8501	-8.23975	-7.62939	-6.10352	-7.62939	-4.88281	-5.18799	-6.40869
-6.40869	-6.71387	-5.79834	-6.40869	-6.40869	-6.10352	-8.54492	-4.57764	-9.15527	-8.23975	-10.0708	-6.40869	-5.18799	-6.71387	-5.79834	-6.10352	-4.27246
-6.71387	-6.10352	-7.32422	-6.10352	-7.93457	-4.88281	-7.62939	-4.57764	-6.10352	-7.01904	-7.32422	-7.32422	-6.40869	-6.71387	-6.10352	-6.10352	-5.49316
-5.49316	-5.49316	-3.66211	-5.79834	-7.62939	-3.35693	-7.01904	-6.10352	-6.40869	-7.32422	-8.23975	-5.49316	-6.71387	-8.23975	-4.27246	-7.32422	-6.40869
-3.05176	-4.57764	-5.79834	-4.27246	-5.79834	-5.79834	-8.54492	-4.57764	-5.49316	-4.88281	-9.15527	-4.88281	-5.18799	-8.8501	-5.49316	-7.62939	-5.79834
-5.18799	-7.01904	-8.8501	-7.62939	-5.79834	-4.88281	-6.10352	-2.44141	-7.01904	-4.88281	-7.93457	-6.40869	-6.10352	-5.49316	-6.40869	-6.40869	-4.57764
-3.05176	-6.71387	-6.10352	-5.49316	-7.62939	-5.18799	-8.23975	-6.40869	-7.32422	-5.79834	-7.93457	-7.32422	-8.23975	-5.18799	-3.96729	-5.79834	-7.62939
-7.62939	-5.79834	-4.88281	-4.88281	-4.57764	-6.40869	-10.376	-7.93457	-6.10352	-6.10352	-10.0708	-5.79834	-6.71387	-4.27246	-2.13623	-6.71387	-7.32422
-7.93457	-7.01904	-3.05176	-6.71387	-4.88281	-5.18799	-7.32422	-5.79834	-5.18799	-6.40869	-7.01904	-6.10352	-8.54492	-3.66211	-4.27246	-5.18799	-4.57764
-3.05176	-4.27246	-4.27246	-8.8501	-6.40869	-3.05176	-5.18799	-4.57764	-3.96729	-6.71387	-5.49316	-7.32422	-7.93457	-6.10352	-4.57764	-7.32422	-6.10352
-4.57764	-3.35693	-4.27246	-6.10352	-5.18799	-5.18799	-5.49316	-3.96729	-6.10352	-6.71387	-7.93457	-5.79834	-6.10352	-6.71387	-4.88281	-7.01904	-5.49316
-6.71387	-4.57764	-8.54492	-4.27246	-6.40869	-5.18799	-5.49316	-6.10352	-7.32422	-7.32422	-6.10352	-6.10352	-6.10352	-5.79834	-6.71387	-6.71387	-4.27246
-4.88281	-4.57764	-5.49316	-6.40869	-9.15527	-2.74658	-4.88281	-9.46045	-7.01904	-7.93457	-4.88281	-6.10352	-5.79834	-5.79834	-4.57764	-4.88281	-6.40869
-3.05176	-4.27246	-4.88281	-4.27246	-5.49316	-5.79834	-7.62939	-8.23975	-5.49316	-5.79834	-5.79834	-4.88281	-3.96729	-7.01904	-4.88281	-5.49316	-6.10352
-7.32422	-6.40869	-7.01904	-6.71387	-3.66211	-4.88281	-7.62939	-5.18799	-8.23975	-5.49316	-6.40869	-6.10352	-4.27246	-5.49316	-4.88281	-6.71387	-3.05176
-3.96729	-7.62939	-7.93457	-7.62939	-7.32422	-3.05176	-3.96729	-6.10352	-8.54492	-4.27246	-7.01904	-7.01904	-6.10352	-6.71387	-4.88281	-5.79834	-4.57764
-3.05176	-5.49316	-5.49316	-3.66211	-4.57764	-5.18799	-5.49316	-5.18799	-6.40869	-6.71387	-7.32422	-4.57764	-4.27246	-5.79834	-3.35693	-5.79834	-4.88281
-7.32422	-6.71387	-6.10352	-6.10352	-5.49316	-6.40869	-7.62939	-3.35693	-5.79834	-7.01904	-7.62939	-4.88281	-1.52588	-3.66211	-3.96729	-5.79834	-3.96729
-5.49316	-7.62939	-6.71387	-6.10352	-9.46045	-4.57764	-6.40869	-5.49316	-4.57764	-5.49316	-4.27246	-4.57764	-3.66211	-4.57764	-4.88281	-6.71387	-6.10352
-5.49316	-7.62939	-4.57764	-6.10352	-6.71387	-6.71387	-7.93457	-5.18799	-5.79834	-7.62939	-5.18799	-3.96729	-3.96729	-5.49316	-4.88281	-5.18799	-5.79834
-7.01904	-9.46045	-6.10352	-5.49316	-4.57764	-6.71387	-7.93457	-4.88281	-5.79834	-7.01904	-6.10352	-3.96729	-4.88281	-4.27246	-5.49316	-6.10352	-2.44141
-6.71387	-7.93457	-5.49316	-6.40869	-6.40869	-3.66211	-3.66211	-3.96729	-8.8501	-7.93457	-3.35693	-6.40869	-5.18799	-2.13623	-5.18799	-4.88281	-4.88281
-5.49316	-5.18799	-5.49316	-7.62939	-7.93457	-3.05176	-5.79834	-3.96729	-8.54492	-6.71387	-4.57764	-4.57764	-6.40869	-5.79834	-6.71387	-4.88281	-7.32422
-7.62939	-7.01904	-6.40869	-8.23975	-4.27246	-5.79834	-8.54492	-3.05176	-6.71387	-7.93457	-5.18799	-3.35693	-3.05176	-5.49316	-3.96729	-6.71387	-5.79834
-8.23975	-8.54492	-8.8501	-9.15527	-7.93457	-4.57764	-6.10352	-4.88281	-7.93457	-6.40869	-4.88281	-6.40869	-5.18799	-6.10352	-3.35693	-6.71387	-7.62939
-5.49316	-6.71387	-5.79834	-6.71387	-7.62939	-5.49316	-4.88281	-6.71387	-7.62939	-5.79834	-6.40869	-4.88281	-5.18799	-8.23975	-3.66211	-4.88281	-9.15527
-8.23975	-7.62939	-4.57764	-5.18799	-6.71387	-7.32422	-6.40869	-2.13623	-8.54492	-6.10352	-7.01904	-3.66211	-3.05176	-5.49316	-2.74658	-4.88281	-3.35693
-8.23975	-7.62939	-7.62939	-7.01904	-7.01904	-4.27246	-7.62939	-3.05176	-7.93457	-7.32422	-6.10352	-5.18799	-4.27246	-4.88281	-4.88281	-6.71387	-2.44141
-5.18799	-7.93457	-4.88281	-9.46045	-6.10352	-3.05176	-8.23975	-7.01904	-7.32422	-7.93457	-6.40869	-3.35693	-6.40869	-7.32422	-5.79834	-7.32422	-4.57764
-6.10352	-5.79834	-6.71387	-7.62939	-5.18799	-7.01904	-9.46045	-7.62939	-6.10352	-7.01904	-6.71387	-4.27246	-6.40869	-8.23975	-5.79834	-5.79834	-5.18799
-7.62939	-8.54492	-7.01904	-8.8501	-6.40869	-6.10352	-7.32422	-6.71387	-6.40869	-7.93457	-4.88281	-6.71387	-5.79834	-4.88281	-3.96729	-4.88281	-3.35693
-5.18799	-9.46045	-5.18799	-10.0708	-9.46045	-3.96729	-5.79834	-6.40869	-6.71387	-7.01904	-7.01904	-6.71387	-6.10352	-7.01904	-3.05176	-6.10352	-3.96729
-4.27246	-8.54492	-5.49316	-6.71387	-5.79834	-4.88281	-8.23975	-6.40869	-6.71387	-7.01904	-8.23975	-4.57764	-5.18799	-6.71387	-3.66211	-6.71387	-3.05176
-7.93457	-8.23975	-7.01904	-7.62939	-7.01904	-3.66211	-6.40869	-5.79834	-7.62939	-6.71387	-7.62939	-7.32422	-3.35693	-4.27246	-2.74658	-5.79834	-2.74658
-4.27246	-6.71387	-6.40869	-9.46045	-8.54492	-4.27246	-5.18799	-6.71387	-7.93457	-6.40869	-6.71387	-7.01904	-4.27246	-5.18799	-5.18799	-3.96729	-4.88281
-4.57764	-7.01904	-5.18799	-5.79834	-7.01904	-7.32422	-7.32422	-5.79834	-7.32422	-7.93457	-8.8501	-3.05176	-4.27246	-6.71387	-5.49316	-4.27246	-5.49316
-5.79834	-8.8501	-7.62939	-5.18799	-7.32422	-5.49316	-8.54492	-6.10352	-8.8501	-8.23975	-6.71387	-5.49316	-3.05176	-5.49316	-4.27246	-5.79834	-3.35693
-5.49316	-9.76563	-6.40869	-6.10352	-8.54492	-4.57764	-4.88281	-7.62939	-9.76563	-7.32422	-5.79834	-8.23975	-5.79834	-7.62939	-3.66211	-6.10352	-4.88281
-4.57764	-8.23975	-5.49316	-8.23975	-5.49316	-6.40869	-7.93457	-5.79834	-6.10352	-7.32422	-7.62939	-4.88281	-5.49316	-7.62939	-7.01904	-9.76563	-6.10352
-5.79834	-7.93457	-8.23975	-7.01904	-3.05176	-6.10352	-10.6812	-4.57764	-4.27246	-8.54492	-6.40869	-5.18799	-5.79834	-3.05176	-3.66211	-7.32422	-5.49316
-6.71387	-7.93457	-7.93457	-9.15527	-7.01904	-3.96729	-8.23975	-5.18799	-7.01904	-6.10352	-6.40869	-6.40869	-6.10352	-3.66211	-3.66211	-4.88281	-6.10352
-7.01904	-5.49316	-5.49316	-6.71387	-7.93457	-7.32422	-7.32422	-7.62939	-6.71387	-5.79834	-5.79834	-5.18799	-4.27246	-6.40869	-6.40869	-6.71387	-6.10352
-8.54492	-7.62939	-7.62939	-6.40869	-5.18799	-6.40869	-6.71387	-7.01904	-7.62939	-7.62939	-5.79834	-6.71387	-5.79834	-6.71387	-5.49316	-6.71387	-4.57764
-7.32422	-7.93457	-5.79834	-6.71387	-6.10352	-2.44141	-3.35693	-7.01904	-6.40869	-6.40869	-5.49316	-9.46045	-7.32422	-6.40869	-6.71387	-6.10352	-3.66211
-5.79834	-6.71387	-4.57764	-5.49316	-6.10352	-6.10352	-3.05176	-8.8501	-5.18799	-7.32422	-6.10352	-5.79834	-7.01904	-7.01904	-6.10352	-4.88281	-7.01904
-7.32422	-8.23975	-4.88281	-4.57764	-4.57764	-8.23975	-8.8501	-6.10352	-6.10352	-7.93457	-5.18799	-6.10352	-7.93457	-5.18799	-3.96729	-8.54492	-3.96729
-5.79834	-8.23975	-7.01904	-7.32422	-7.93457	-6.71387	-8.23975	-5.49316	-7.01904	-7.01904	-3.96729	-8.54492	-8.8501	-6.40869	-3.66211	-7.93457	-4.88281
-4.57764	-5.49316	-5.49316	-6.71387	-9.46045	-7.32422	-8.23975	-6.71387	-6.71387	-5.79834	-3.05176	-7.32422	-6.71387	-8.54492	-6.40869	-6.40869	-6.10352
-4.57764	-4.27246	-5.79834	-5.49316	-6.10352	-8.23975	-9.76563	-5.79834	-5.18799	-6.40869	-4.88281	-6.10352	-6.40869	-4.27246	-7.01904	-8.8501	-4.27246
-3.96729	-7.32422	-6.10352	-6.71387	-7.62939	-4.57764	-7.01904	-4.27246	-8.23975	-6.40869	-5.18799	-6.40869	-7.32422	-4.57764	-5.79834	-7.32422	-3.35693
-4.57764	-5.18799	-3.66211	-7.62939	-7.93457	-2.74658	-7.01904	-6.40869	-9.76563	-5.18799	-4.88281	-4.57764	-6.71387	-7.32422	-7.01904	-7.32422	-4.57764
-7.62939	-5.49316	-5.18799	-7.62939	-3.35693	-5.79834	-7.62939	-6.71387	-7.32422	-7.93457	-6.71387	-2.13623	-5.79834	-7.01904	-5.49316	-5.18799	-3.66211
-8.54492	-6.71387	-7.93457	-7.01904	-5.49316	-5.79834	-6.40869	-5.49316	-7.01904	-9.46045	-5.79834	-6.10352	-6.10352	-5.79834	-5.49316	-6.10352	-3.35693
-7.01904	-6.71387	-4.88281	-8.54492	-8.8501	-5.49316	-4.27246	-7.32422	-7.93457	-7.01904	-6.40869	-6.71387	-5.49316	-4.88281	-6.40869	-5.79834	-5.49316
-6.10352	-5.18799	-5.49316	-5.79834	-6.40869	-8.23975	-7.32422	-4.57764	-6.10352	-5.79834	-6.10352	-3.35693	-5.18799	-4.88281	-6.10352	-6.71387	-3.96729
-6.71387	-4.57764	-9.15527	-5.49316	-7.01904	-4.88281	-8.54492	-3.96729	-7.01904	-4.88281	-4.88281	-7.93457	-4.88281	-2.74658	-4.88281	-7.32422	-4.27246
-5.49316	-4.27246	-4.57764	-5.49316	-9.76563	-1.2207	-6.10352	-7.32422	-6.10352	-3.96729	-5.79834	-7.32422	-7.01904	-6.71387	-6.71387	-4.27246	-6.71387
-5.79834	-4.27246	-4.57764	-6.10352	-6.71387	-3.96729	-7.93457	-8.8501	-5.18799	-4.88281	-5.18799	-3.66211	-6.10352	-7.93457	-6.10352	-5.79834	-7.01904
-5.79834	-6.10352	-7.93457	-5.79834	-7.62939	-4.27246	-6.40869	-5.49316	-5.79834	-7.62939	-5.18799	-5.18799	-6.40869	-2.74658	-3.96729	-6.71387	-4.57764
-5.49316	-6.40869	-5.49316	-6.71387	-10.6812	-4.57764	-7.01904	-7.62939	-6.10352	-5.49316	-5.18799	-6.40869	-7.32422	-3.96729	-6.40869	-5.49316	-5.18799
-6.10352	-4.88281	-5.18799	-8.23975	-9.76563	-6.10352	-7.62939	-5.49316	-7.32422	-5.79834	-7.32422	-3.35693	-6.40869	-5.79834	-6.71387	-5.49316	-4.88281
-8.23975	-4.88281	-5.49316	-8.23975	-8.8501	-5.79834	-8.54492	-6.10352	-6.71387	-7.93457	-6.10352	-3.96729	-7.62939	-3.96729	-5.18799	-8.54492	-3.05176
-6.40869	-6.10352	-6.40869	-7.32422	-9.76563	-6.10352	-3.96729	-9.46045	-7.62939	-7.93457	-4.88281	-6.10352	-8.54492	-4.57764	-5.18799	-7.32422	-5.18799
-4.57764	-5.79834	-3.96729	-6.40869	-8.54492	-8.23975	-5.49316	-7.93457	-7.62939	-7.93457	-6.71387	-4.27246	-6.10352	-7.01904	-6.10352	-5.79834	-4.57764
-6.10352	-5.49316	-6.10352	-6.40869	-4.88281	-8.23975	-8.54492	-5.49316	-8.8501	-8.23975	-6.71387	-6.10352	-4.88281	-4.27246	-3.35693	-7.32422	-1.52588
-4.88281	-7.62939	-6.40869	-6.71387	-6.71387	-4.88281	-6.10352	-6.10352	-6.10352	-5.79834	-5.79834	-8.8501	-6.40869	-6.10352	-3.66211	-5.18799	-5.18799
-4.27246	-5.49316	-4.27246	-7.62939	-7.01904	-6.71387	-6.10352	-6.40869	-5.18799	-4.57764	-5.49316	-5.18799	-4.57764	-7.93457	-5.79834	-4.88281	-6.40869
-5.79834	-7.32422	-6.40869	-6.10352	-5.49316	-7.62939	-7.62939	-2.74658	-7.62939	-7.01904	-8.23975	-3.96729	-6.71387	-4.88281	-3.05176	-5.18799	-4.57764
-5.18799	-7.01904	-6.71387	-5.49316	-6.40869	-4.88281	-5.79834	-6.71387	-8.23975	-5.18799	-5.49316	-6.10352	-8.23975	-4.57764	-5.18799	-7.32422	-5.79834
-3.96729	-6.71387	-5.49316	-6.10352	-6.71387	-6.10352	-6.10352	-7.62939	-7.62939	-6.10352	-5.18799	-5.79834	-8.23975	-5.18799	-5.79834	-4.27246	-7.93457
-7.01904	-8.54492	-5.18799	-8.23975	-3.35693	-7.01904	-6.71387	-6.10352	-7.32422	-7.32422	-5.49316	-4.57764	-4.88281	-4.57764	-4.88281	-6.40869	-6.40869
-6.71387	-8.23975	-8.54492	-7.01904	-4.57764	-4.27246	-4.88281	-6.40869	-5.49316	-4.88281	-5.18799	-6.10352	-6.40869	-4.57764	-3.66211	-7.01904	-6.10352
-5.18799	-6.40869	-5.79834	-7.62939	-7.62939	-4.88281	-4.88281	-9.46045	-4.88281	-4.57764	-3.66211	-5.18799	-6.40869	-7.01904	-5.49316	-5.49316	-7.93457
-8.23975	-7.01904	-6.71387	-6.40869	-4.57764	-5.49316	-7.01904	-6.10352	-4.57764	-8.23975	-4.57764	-3.96729	-4.88281	-6.71387	-6.40869	-7.93457	-5.49316
-7.32422	-9.15527	-7.93457	-7.32422	-5.79834	-3.66211	-7.93457	-7.93457	-7.01904	-7.32422	-4.27246	-4.88281	-5.79834	-2.74658	-5.49316	-5.79834	-4.57764
-7.32422	-9.15527	-4.88281	-4.88281	-7.62939	-5.79834	-7.32422	-8.54492	-7.32422	-3.05176	-4.27246	-4.27246	-6.71387	-6.40869	-7.32422	-6.10352	-6.10352
-6.10352	-7.62939	-6.40869	-4.27246	-6.40869	-8.23975	-7.32422	-3.96729	-7.01904	-6.10352	-7.01904	-3.96729	-7.32422	-7.62939	-7.01904	-4.88281	-4.27246
-5.79834	-7.32422	-7.62939	-6.71387	-7.32422	-6.10352	-6.40869	-5.49316	-7.32422	-7.62939	-5.49316	-7.01904	-6.71387	-3.66211	-5.18799	-4.88281	-5.49316
-5.79834	-7.01904	-7.32422	-7.32422	-11.2915	-4.57764	-3.96729	-9.15527	-6.10352	-6.10352	-4.88281	-6.71387	-7.32422	-6.10352	-6.71387	-5.79834	-7.01904
-6.10352	-6.10352	-6.40869	-7.93457	-7.32422	-6.40869	-6.40869	-7.32422	-6.71387	-9.15527	-5.49316	-5.49316	-5.49316	-7.01904	-7.01904	-7.01904	-4.27246
-7.32422	-7.32422	-8.8501	-9.46045	-6.10352	-7.01904	-7.93457	-7.62939	-7.62939	-7.93457	-4.57764	-8.23975	-7.01904	-3.05176	-4.88281	-7.62939	-3.66211
-6.10352	-8.8501	-7.62939	-7.93457	-9.15527	-3.35693	-5.49316	-8.8501	-8.8501	-5.18799	-5.18799	-7.01904	-7.01904	-4.88281	-3.66211	-7.32422	-4.57764
-5.79834	-7.62939	-6.71387	-7.32422	-7.62939	-9.15527	-7.32422	-7.62939	-8.8501	-4.57764	-5.49316	-4.57764	-4.57764	-5.49316	-4.88281	-7.32422	-5.49316
-6.40869	-7.32422	-8.23975	-8.54492	-6.71387	-7.62939	-8.8501	-6.71387	-7.62939	-7.93457	-4.27246	-6.71387	-3.66211	-0.91553	-5.18799	-6.10352	-3.05176
-6.40869	-6.71387	-7.32422	-8.23975	-7.93457	-4.88281	-9.15527	-9.46045	-6.71387	-4.88281	-4.88281	-5.49316	-6.71387	-2.13623	-6.10352	-5.18799	-4.27246
-7.32422	-5.79834	-4.88281	-7.93457	-6.40869	-7.93457	-7.32422	-8.23975	-5.79834	-5.79834	-7.32422	-3.66211	-7.32422	-5.18799	-5.79834	-5.49316	-4.88281
-5.79834	-7.01904	-6.71387	-7.62939	-4.88281	-7.01904	-8.23975	-3.66211	-8.54492	-7.93457	-6.10352	-5.18799	-6.40869	-3.96729	-4.88281	-6.40869	-3.05176
-6.10352	-6.10352	-7.32422	-7.62939	-6.40869	-5.49316	-6.71387	-7.32422	-6.71387	-6.40869	-2.44141	-6.40869	-5.79834	-3.05176	-4.88281	-6.71387	-3.96729
-6.71387	-5.18799	-4.57764	-7.62939	-5.49316	-9.76563	-6.40869	-7.01904	-7.62939	-5.49316	-4.57764	-4.27246	-6.71387	-6.40869	-5.49316	-5.49316	-5.79834
-5.79834	-6.10352	-5.18799	-9.46045	-5.18799	-9.15527	-7.32422	-5.18799	-7.01904	-5.18799	-5.18799	-5.49316	-6.10352	-4.57764	-5.49316	-7.93457	-5.18799
-5.49316	-6.40869	-7.32422	-7.32422	-6.71387	-2.13623	-6.40869	-7.62939	-4.27246	-5.49316	-4.27246	-6.40869	-7.32422	-1.52588	-3.96729	-7.01904	-4.88281
-5.18799	-7.01904	-3.96729	-7.93457	-9.46045	-3.96729	-7.62939	-10.376	-6.40869	-5.49316	-5.49316	-6.71387	-7.01904	-4.27246	-7.32422	-6.40869	-5.18799
-4.27246	-8.54492	-5.18799	-10.0708	-7.32422	-7.93457	-8.8501	-8.54492	-5.79834	-8.23975	-6.10352	-6.10352	-5.49316	-3.96729	-8.23975	-5.49316	-3.96729
-2.74658	-8.23975	-5.79834	-10.0708	-7.93457	-5.18799	-9.15527	-9.46045	-5.18799	-5.49316	-3.66211	-7.32422	-7.62939	-3.96729	-5.49316	-5.79834	-3.66211
-3.96729	-7.01904	-4.57764	-10.6812	-10.376	-7.93457	-7.93457	-9.46045	-5.79834	-4.27246	-3.05176	-6.10352	-6.71387	-5.18799	-6.40869	-6.10352	-3.35693
-2.74658	-8.23975	-7.01904	-9.46045	-5.79834	-8.54492	-7.32422	-5.49316	-5.18799	-7.93457	-5.49316	-5.79834	-6.10352	-6.10352	-5.49316	-6.71387	-3.66211
-3.35693	-7.62939	-10.0708	-8.54492	-6.71387	-5.49316	-7.93457	-5.79834	-5.49316	-3.96729	-6.71387	-8.23975	-7.93457	-5.49316	-4.57764	-6.10352	-4.57764
-3.35693	-7.62939	-4.88281	-8.54492	-9.76563	-4.88281	-7.62939	-7.93457	-7.32422	-6.71387	-8.8501	-4.88281	-8.8501	-6.40869	-7.01904	-4.88281	-4.88281
-3.35693	-8.54492	-5.18799	-10.0708	-6.10352	-9.76563	-8.8501	-5.18799	-8.8501	-7.01904	-6.40869	-3.96729	-4.88281	-4.88281	-6.40869	-7.93457	-3.35693
-2.13623	-7.32422	-9.15527	-6.71387	-5.49316	-6.10352	-9.15527	-5.79834	-7.62939	-6.71387	-5.79834	-7.93457	-5.18799	-1.83105	-3.66211	-7.01904	-3.66211
-1.83105	-7.32422	-6.71387	-7.01904	-9.46045	-6.71387	-6.71387	-8.54492	-8.54492	-4.57764	-5.79834	-7.01904	-8.23975	-5.49316	-3.96729	-6.71387	-3.96729
-2.74658	-7.93457	-6.40869	-9.76563	-6.10352	-11.2915	-7.01904	-7.62939	-7.01904	-6.10352	-7.62939	-6.10352	-7.62939	-7.01904	-7.01904	-6.40869	-3.35693
-2.44141	-7.93457	-7.32422	-9.76563	-3.96729	-7.32422	-8.23975	-7.32422	-7.32422	-7.93457	-7.01904	-7.01904	-6.40869	-7.93457	-6.10352	-7.32422	-3.35693
-3.96729	-7.62939	-6.71387	-7.32422	-6.40869	-5.79834	-8.23975	-9.15527	-5.18799	-2.13623	-6.40869	-6.71387	-6.10352	-8.23975	-7.01904	-6.71387	-7.01904
-4.27246	-7.62939	-5.49316	-5.18799	-5.49316	-8.54492	-9.76563	-5.79834	-7.62939	-5.18799	-8.23975	-4.57764	-5.18799	-7.62939	-7.01904	-6.71387	-7.32422
-3.05176	-7.93457	-7.93457	-6.40869	-5.18799	-8.23975	-9.15527	-4.88281	-6.71387	-7.01904	-8.54492	-7.93457	-6.10352	-6.10352	-4.27246	-6.40869	-5.49316
-4.57764	-7.32422	-7.32422	-7.62939	-7.01904	-5.79834	-7.32422	-8.8501	-5.79834	-3.66211	-7.93457	-8.8501	-7.32422	-4.57764	-5.79834	-5.18799	-5.79834
-5.79834	-7.62939	-4.27246	-8.23975	-7.93457	-7.01904	-7.01904	-7.93457	-7.62939	-5.18799	-5.18799	-4.88281	-4.88281	-8.8501	-7.32422	-7.01904	-5.18799
-5.79834	-8.8501	-7.01904	-7.62939	-5.18799	-4.88281	-6.71387	-6.10352	-6.71387	-7.62939	-5.18799	-7.62939	-6.10352	-7.01904	-4.88281	-6.71387	-6.10352
-4.57764	-7.93457	-6.71387	-7.01904	-7.93457	-3.66211	-6.71387	-6.71387	-6.40869	-7.01904	-5.79834	-5.18799	-9.15527	-7.01904	-5.49316	-5.18799	-6.40869
-4.57764	-4.88281	-3.66211	-5.49316	-6.40869	-6.71387	-7.32422	-8.8501	-6.71387	-7.32422	-7.01904	-5.79834	-7.32422	-6.40869	-6.40869	-5.18799	-6.10352
-5.49316	-6.40869	-7.62939	-5.18799	-4.57764	-4.57764	-7.01904	-7.32422	-6.71387	-8.23975	-6.10352	-6.40869	-4.88281	-4.57764	-5.18799	-7.32422	-5.49316
-6.10352	-6.71387	-7.01904	-4.88281	-7.93457	-5.18799	-7.32422	-10.376	-5.18799	-5.18799	-5.79834	-5.79834	-7.01904	-4.57764	-4.88281	-6.71387	-6.10352
-5.18799	-7.32422	-5.18799	-5.79834	-8.23975	-7.62939	-7.32422	-9.46045	-6.40869	-6.10352	-6.71387	-3.35693	-7.32422	-6.71387	-7.93457	-6.10352	-6.40869
-4.88281	-7.01904	-5.49316	-5.18799	-6.71387	-6.10352	-9.46045	-5.79834	-6.71387	-7.62939	-7.01904	-5.49316	-5.79834	-6.40869	-6.10352	-6.10352	-5.79834
-5.18799	-7.93457	-7.32422	-6.40869	-8.54492	-3.05176	-7.01904	-8.23975	-5.79834	-4.57764	-4.27246	-8.8501	-7.32422	-3.05176	-3.05176	-7.01904	-5.18799
-6.71387	-9.76563	-4.27246	-8.54492	-10.376	-6.10352	-5.49316	-8.54492	-6.71387	-5.18799	-4.57764	-7.32422	-7.01904	-5.18799	-5.18799	-7.93457	-4.27246
-6.10352	-5.18799	-2.74658	-9.76563	-6.40869	-6.71387	-6.71387	-4.27246	-7.32422	-7.32422	-5.79834	-6.71387	-5.18799	-3.96729	-4.88281	-6.71387	-5.49316
-7.32422	-7.32422	-7.01904	-8.54492	-6.40869	-3.05176	-5.79834	-6.40869	-5.18799	-5.49316	-5.18799	-5.18799	-6.71387	-2.44141	-3.05176	-5.79834	-5.18799
-6.40869	-6.40869	-5.79834	-8.54492	-8.23975	-7.01904	-6.40869	-8.8501	-6.10352	-5.49316	-6.71387	-3.05176	-8.54492	-4.88281	-5.49316	-5.18799	-5.49316
-5.79834	-8.23975	-6.40869	-8.8501	-6.40869	-8.54492	-8.54492	-6.40869	-9.15527	-8.54492	-6.10352	-3.35693	-5.18799	-6.40869	-6.10352	-7.32422	-3.66211
-6.40869	-7.32422	-9.76563	-7.93457	-4.88281	-5.79834	-7.62939	-6.40869	-6.71387	-5.18799	-3.96729	-7.01904	-5.18799	-5.18799	-3.05176	-7.93457	-2.74658
-7.01904	-7.62939	-8.54492	-6.71387	-8.54492	-7.32422	-4.27246	-7.93457	-5.18799	-5.49316	-3.96729	-4.88281	-6.71387	-6.40869	-3.05176	-5.18799	-5.49316
-6.40869	-7.32422	-6.10352	-8.54492	-7.62939	-8.54492	-5.79834	-3.96729	-6.10352	-5.49316	-6.10352	-2.74658	-5.18799	-7.01904	-6.40869	-4.88281	-5.18799
-6.40869	-7.32422	-8.54492	-7.01904	-5.79834	-4.27246	-5.79834	-4.57764	-7.01904	-6.10352	-6.10352	-5.49316	-4.88281	-3.96729	-4.27246	-5.79834	-3.35693
-6.40869	-7.62939	-6.40869	-7.32422	-7.32422	-4.88281	-4.57764	-7.01904	-7.93457	-3.66211	-7.01904	-4.27246	-7.62939	-5.79834	-4.57764	-5.18799	-2.74658
-8.8501	-7.62939	-4.57764	-8.23975	-6.71387	-8.8501	-7.62939	-6.71387	-9.76563	-6.10352	-7.32422	-4.57764	-5.49316	-7.62939	-5.49316	-7.01904	-3.66211
-6.40869	-6.71387	-7.32422	-7.01904	-7.01904	-6.71387	-7.32422	-6.10352	-7.93457	-8.54492	-7.32422	-5.18799	-5.49316	-5.49316	-4.27246	-8.23975	-0.91553
-6.71387	-6.71387	-7.62939	-5.49316	-7.62939	-5.79834	-7.32422	-9.46045	-6.40869	-4.27246	-5.79834	-5.49316	-6.40869	-6.71387	-5.79834	-7.01904	0
-5.18799	-7.32422	-4.88281	-8.23975	-5.49316	-6.40869	-8.54492	-7.62939	-6.10352	-5.18799	-4.88281	-3.96729	-7.32422	-7.62939	-6.40869	-5.49316	-4.57764
-4.88281	-6.10352	-6.71387	-8.23975	-4.27246	-4.27246	-6.71387	-5.79834	-5.49316	-5.18799	-5.79834	-6.71387	-6.71387	-5.49316	-3.96729	-7.32422	-3.66211
-6.71387	-7.62939	-7.32422	-7.32422	-6.40869	-5.18799	-6.71387	-7.32422	-4.27246	-3.05176	-7.32422	-5.49316	-8.23975	-3.66211	-3.05176	-6.10352	-4.57764
-6.71387	-9.46045	-3.35693	-9.46045	-5.79834	-8.54492	-7.01904	-5.49316	-6.40869	-3.96729	-8.54492	-4.27246	-7.32422	-7.93457	-3.66211	-5.49316	-4.88281
-6.40869	-5.79834	-7.62939	-7.32422	-5.79834	-7.32422	-7.93457	-6.10352	-7.93457	-6.10352	-4.88281	-6.71387	-3.96729	-6.40869	-3.96729	-6.10352	-3.96729
-5.18799	-8.23975	-8.8501	-6.10352	-9.15527	-3.96729	-6.10352	-10.0708	-5.79834	-4.27246	-3.35693	-6.40869	-6.40869	-4.27246	-5.49316	-5.79834	-3.96729
-7.32422	-8.54492	-5.18799	-8.54492	-9.46045	-10.0708	-5.49316	-8.8501	-4.88281	-5.18799	-5.79834	-3.96729	-4.57764	-7.93457	-7.32422	-6.71387	-6.40869
-6.40869	-6.40869	-6.40869	-7.62939	-7.93457	-8.8501	-7.01904	-6.40869	-7.93457	-7.01904	-5.49316	-4.57764	-3.96729	-6.71387	-6.71387	-7.93457	-5.79834
-7.01904	-3.96729	-8.54492	-6.10352	-9.15527	-6.10352	-7.62939	-9.76563	-7.32422	-3.35693	-3.96729	-5.49316	-4.88281	-3.66211	-4.27246	-7.01904	-4.27246
-7.01904	-6.10352	-6.40869	-6.10352	-9.46045	-7.62939	-5.18799	-9.15527	-7.01904	-6.40869	-5.79834	-1.2207	-6.40869	-3.96729	-5.18799	-6.10352	-5.79834
-5.79834	-7.93457	-5.18799	-7.62939	-7.32422	-7.32422	-4.57764	-5.49316	-8.8501	-7.62939	-7.62939	-6.40869	-6.71387	-6.10352	-4.88281	-8.23975	-4.88281
-7.32422	-7.32422	-8.54492	-7.62939	-8.23975	-3.66211	-5.18799	-8.54492	-7.62939	-7.01904	-7.32422	-9.76563	-5.79834	-3.66211	-2.13623	-5.49316	-3.66211
-7.93457	-10.0708	-5.79834	-7.32422	-9.15527	-5.18799	-5.18799	-8.23975	-6.40869	-3.35693	-7.32422	-6.40869	-6.10352	-4.88281	-3.66211	-4.57764	-3.35693
-6.71387	-8.54492	-6.10352	-7.32422	-6.71387	-7.32422	-7.01904	-7.01904	-6.10352	-6.40869	-5.79834	-6.71387	-6.10352	-7.93457	-4.27246	-6.10352	-3.05176
-7.32422	-8.23975	-9.15527	-7.01904	-9.15527	-4.57764	-6.10352	-7.62939	-7.32422	-7.01904	-5.79834	-7.32422	-6.40869	-5.49316	-3.35693	-7.01904	-3.35693
-6.71387	-6.40869	-7.01904	-10.376	-10.0708	-7.01904	-6.40869	-7.01904	-5.18799	-5.18799	-6.40869	-5.79834	-6.71387	-6.71387	-5.79834	-5.79834	-5.49316
-6.71387	-6.40869	-9.15527	-10.6812	-7.93457	-8.23975	-7.32422	-4.88281	-7.32422	-7.93457	-5.79834	-4.57764	-5.18799	-6.40869	-7.62939	-4.27246	-5.18799
-6.40869	-6.10352	-9.76563	-6.71387	-6.71387	-5.79834	-8.8501	-4.88281	-7.62939	-7.93457	-7.32422	-7.62939	-6.10352	-3.35693	-4.88281	-4.88281	-3.96729
-7.32422	-5.18799	-8.54492	-3.66211	-8.23975	-7.32422	-9.15527	-8.54492	-5.49316	-7.01904	-8.23975	-6.40869	-3.96729	-4.27246	-6.71387	-6.10352	-3.66211
-8.23975	-7.32422	-4.27246	-5.79834	-7.32422	-8.54492	-8.54492	-7.32422	-7.62939	-9.46045	-10.6812	-8.54492	-3.66211	-7.93457	-7.93457	-8.23975	-3.66211
-7.01904	-7.93457	-6.10352	-5.18799	-8.54492	-7.01904	-6.71387	-8.54492	-7.62939	-7.93457	-9.76563	-7.62939	-4.57764	-9.15527	-3.66211	-7.32422	-3.35693
-9.15527	-8.8501	-7.01904	-5.49316	-10.9863	-5.49316	-6.10352	-8.23975	-5.79834	-5.49316	-6.10352	-4.88281	-7.93457	-6.71387	-3.96729	-5.18799	-6.40869
-9.15527	-10.376	-4.57764	-7.32422	-7.32422	-7.62939	-5.79834	-6.10352	-7.62939	-8.23975	-5.18799	-6.40869	-4.88281	-7.93457	-7.32422	-5.79834	-7.32422
-5.49316	-7.01904	-6.71387	-6.71387	-4.88281	-7.32422	-8.23975	-7.32422	-7.93457	-8.23975	-6.71387	-7.32422	-4.27246	-6.40869	-6.71387	-9.15527	-6.40869
-5.49316	-4.27246	-8.23975	-7.32422	-7.01904	-3.96729	-6.40869	-9.46045	-8.8501	-4.88281	-7.62939	-6.40869	-7.32422	-4.27246	-8.23975	-8.54492	-6.10352
-6.71387	-7.01904	-5.79834	-8.8501	-7.32422	-5.18799	-6.10352	-7.62939	-9.76563	-7.93457	-7.01904	-2.74658	-4.57764	-8.54492	-8.8501	-7.32422	-4.27246
-6.40869	-6.71387	-7.62939	-6.71387	-5.79834	-5.18799	-7.62939	-7.32422	-6.71387	-7.93457	-7.62939	-9.15527	-4.57764	-6.10352	-4.88281	-6.40869	-3.05176
-9.15527	-6.40869	-9.46045	-6.71387	-7.93457	-4.57764	-7.32422	-10.9863	-3.96729	-6.10352	-7.62939	-8.54492	-5.79834	-3.05176	-4.57764	-3.96729	-4.57764
-8.54492	-7.01904	-5.49316	-7.93457	-7.93457	-5.79834	-6.10352	-9.76563	-5.18799	-6.10352	-9.15527	-4.27246	-6.10352	-5.79834	-7.62939	-4.88281	-7.93457
-4.88281	-4.88281	-6.10352	-7.32422	-5.18799	-5.18799	-6.40869	-6.10352	-6.71387	-5.18799	-7.62939	-7.62939	-4.88281	-9.15527	-5.79834	-6.71387	-6.40869
-4.57764	-6.40869	-8.23975	-7.01904	-6.71387	-3.96729	-6.40869	-8.54492	-5.79834	-4.57764	-5.18799	-7.32422	-5.79834	-6.71387	-4.88281	-6.71387	-6.40869
-7.62939	-6.71387	-5.79834	-8.23975	-8.23975	-6.10352	-7.32422	-9.15527	-6.40869	-5.49316	-6.71387	-4.88281	-5.79834	-6.10352	-7.32422	-8.54492	-5.49316
-6.40869	-6.40869	-3.96729	-9.46045	-6.10352	-6.10352	-10.9863	-6.40869	-6.71387	-8.8501	-5.18799	-5.79834	-5.79834	-7.01904	-7.32422	-8.8501	-3.35693
-7.01904	-3.96729	-7.32422	-7.32422	-8.54492	-4.57764	-10.6812	-8.8501	-5.79834	-5.79834	-6.40869	-7.01904	-8.8501	-3.96729	-3.66211	-7.93457	-3.35693
-8.23975	-6.40869	-3.35693	-6.40869	-9.46045	-4.27246	-7.32422	-9.76563	-8.54492	-7.01904	-7.01904	-6.40869	-6.71387	-7.62939	-6.10352	-6.71387	-6.10352
-7.32422	-6.40869	-4.27246	-5.49316	-7.32422	-4.57764	-7.01904	-6.71387	-8.8501	-9.15527	-7.62939	-7.32422	-7.93457	-8.23975	-6.40869	-9.15527	-6.40869
-5.49316	-4.88281	-8.54492	-4.88281	-5.49316	-3.05176	-7.93457	-8.23975	-5.79834	-7.01904	-9.76563	-9.46045	-7.32422	-5.49316	-5.18799	-9.46045	-5.18799
-7.93457	-7.01904	-7.93457	-5.79834	-7.32422	-3.05176	-6.10352	-7.93457	-3.66211	-5.79834	-6.40869	-5.49316	-8.54492	-6.10352	-8.23975	-7.62939	-6.40869
-6.40869	-5.79834	-4.27246	-6.40869	-5.79834	-4.27246	-9.15527	-6.40869	-7.62939	-7.93457	-6.40869	-6.40869	-3.35693	-8.54492	-6.10352	-7.93457	-6.40869
-7.01904	-6.40869	-7.01904	-5.49316	-7.01904	-2.74658	-9.76563	-7.32422	-8.54492	-6.40869	-6.10352	-6.71387	-4.57764	-5.79834	-3.66211	-7.93457	-6.10352
-10.0708	-7.62939	-7.01904	-7.93457	-10.0708	-6.71387	-8.54492	-11.2915	-8.54492	-4.27246	-7.32422	-4.57764	-6.71387	-5.18799	-6.10352	-7.01904	-8.23975
-7.62939	-7.01904	-3.96729	-6.10352	-6.40869	-7.01904	-8.54492	-10.0708	-9.15527	-7.62939	-8.23975	-3.66211	-5.49316	-6.40869	-7.62939	-8.54492	-5.49316
-7.01904	-5.49316	-6.40869	-6.40869	-4.27246	-4.88281	-8.54492	-8.23975	-8.23975	-7.32422	-8.23975	-6.40869	-6.10352	-5.18799	-6.10352	-6.10352	-3.96729
-7.62939	-5.79834	-7.32422	-7.01904	-7.32422	-4.57764	-4.88281	-10.0708	-7.62939	-4.88281	-6.71387	-5.49316	-4.88281	-5.79834	-6.10352	-7.32422	-4.88281
-6.71387	-7.62939	-4.88281	-6.10352	-6.71387	-5.49316	-6.71387	-8.8501	-9.76563	-5.49316	-6.10352	-5.49316	-7.62939	-6.10352	-6.71387	-7.62939	-7.62939
-4.88281	-4.88281	-5.79834	-5.79834	-4.88281	-3.66211	-9.76563	-10.0708	-7.32422	-4.27246	-6.40869	-8.23975	-7.01904	-4.57764	-3.35693	-7.32422	-7.01904
-6.10352	-6.40869	-7.32422	-6.10352	-7.32422	-3.05176	-5.49316	-10.6812	-4.57764	-2.44141	-4.88281	-5.18799	-8.54492	-3.66211	-4.27246	-9.15527	-4.88281
-9.15527	-7.01904	-4.27246	-8.54492	-6.71387	-6.71387	-7.32422	-11.9019	-8.54492	-3.66211	-5.49316	-6.10352	-3.66211	-6.10352	-7.01904	-8.8501	-4.88281
-7.01904	-5.18799	-3.35693	-3.96729	-4.88281	-5.18799	-7.93457	-10.376	-8.8501	-6.40869	-5.79834	-7.93457	-3.35693	-5.49316	-5.18799	-8.54492	-4.88281
-6.71387	-7.32422	-5.79834	-3.96729	-7.32422	-3.96729	-6.71387	-12.207	-5.49316	-2.13623	-7.32422	-6.71387	-5.79834	-3.35693	-6.71387	-7.32422	-3.05176
-9.76563	-9.15527	-3.66211	-6.71387	-7.32422	-6.71387	-6.10352	-11.9019	-7.93457	-4.27246	-5.79834	-3.35693	-3.35693	-4.57764	-6.40869	-7.93457	-5.49316
-6.40869	-6.10352	-2.74658	-7.93457	-4.88281	-5.18799	-7.32422	-7.93457	-9.76563	-7.01904	-5.18799	-4.88281	-3.35693	-6.40869	-2.74658	-6.10352	-5.79834
-3.35693	-3.05176	-6.71387	-5.49316	-6.40869	-4.88281	-8.54492	-8.54492	-8.23975	-4.57764	-3.96729	-8.23975	-6.10352	-3.05176	-2.74658	-5.79834	-4.88281
-5.79834	-6.10352	-6.10352	-6.71387	-7.93457	-7.62939	-5.79834	-8.8501	-5.49316	-6.10352	-4.27246	-4.57764	-7.93457	-3.66211	-6.10352	-7.62939	-5.49316
-6.10352	-4.88281	-3.35693	-7.01904	-5.79834	-5.49316	-6.40869	-6.71387	-5.49316	-6.40869	-6.40869	-7.62939	-6.71387	-6.10352	-6.10352	-7.62939	-6.10352
-5.18799	-5.49316	-6.10352	-4.57764	-6.71387	-1.83105	-5.18799	-7.93457	-4.88281	-5.49316	-6.10352	-6.71387	-7.01904	-2.74658	-4.88281	-6.10352	-6.10352
-7.93457	-8.23975	-4.27246	-7.01904	-8.23975	-3.66211	-4.57764	-8.23975	-3.96729	-6.71387	-3.96729	-3.66211	-6.10352	-3.96729	-5.49316	-5.18799	-7.62939
-4.57764	-7.01904	-3.96729	-5.49316	-5.18799	-4.27246	-4.88281	-7.62939	-5.79834	-7.01904	-3.66211	-6.10352	-5.49316	-4.88281	-6.10352	-4.88281	-6.40869
-5.49316	-5.79834	-7.93457	-5.79834	-6.10352	-2.13623	-3.96729	-6.40869	-7.01904	-4.88281	-4.57764	-7.93457	-4.88281	-2.74658	-2.74658	-6.40869	-3.66211
-8.23975	-6.10352	-5.79834	-9.46045	-8.23975	-6.71387	-4.27246	-6.40869	-7.62939	-3.96729	-4.57764	-4.27246	-4.88281	-0.61035	-5.49316	-6.71387	-4.57764
-7.62939	-7.93457	-5.79834	-9.46045	-6.10352	-6.71387	-7.01904	-4.88281	-8.8501	-5.49316	-5.79834	-7.01904	-5.18799	-4.27246	-7.01904	-7.32422	-2.74658
-4.57764	-7.01904	-6.71387	-5.79834	-7.32422	-4.88281	-7.62939	-7.93457	-6.40869	-4.27246	-5.79834	-7.32422	-5.79834	-5.49316	-3.96729	-6.71387	-2.74658
-7.01904	-6.40869	-4.88281	-4.27246	-10.6812	-4.88281	-4.57764	-9.76563	-4.88281	-4.27246	-6.40869	-4.88281	-6.71387	-3.66211	-5.79834	-6.71387	-4.57764
-7.32422	-8.54492	-3.35693	-6.40869	-7.93457	-6.40869	-5.49316	-7.32422	-8.54492	-6.10352	-6.10352	-6.10352	-4.57764	-6.71387	-5.49316	-4.57764	-5.49316
-4.27246	-5.79834	-4.88281	-6.71387	-7.32422	-3.96729	-7.93457	-6.40869	-8.54492	-6.71387	-3.66211	-6.71387	-4.57764	-5.49316	-5.49316	-5.79834	-5.18799
-6.10352	-7.01904	-6.71387	-6.10352	-10.0708	-4.27246	-5.49316	-6.10352	-6.40869	-4.57764	-4.27246	-4.27246	-7.32422	-5.18799	-7.62939	-5.79834	-4.27246
-6.71387	-8.54492	-6.40869	-6.40869	-6.10352	-8.54492	-5.18799	-9.15527	-6.71387	-6.71387	-5.79834	-3.96729	-5.18799	-5.79834	-7.62939	-5.18799	-7.62939
-6.71387	-5.49316	-8.23975	-5.49316	-6.40869	-5.49316	-7.62939	-7.93457	-6.10352	-7.01904	-4.88281	-8.23975	-3.96729	-5.79834	-6.10352	-5.49316	-5.18799
-8.23975	-3.96729	-7.62939	-5.18799	-7.93457	-5.49316	-7.62939	-10.0708	-4.88281	-5.79834	-4.57764	-5.49316	-5.79834	-3.66211	-6.10352	-4.27246	-4.88281
-10.9863	-7.32422	-3.05176	-5.79834	-7.01904	-6.71387	-7.32422	-7.32422	-6.10352	-6.71387	-4.88281	-4.27246	-6.71387	-7.32422	-7.62939	-3.96729	-5.18799
-8.54492	-4.57764	-4.57764	-7.32422	-5.18799	-4.57764	-7.32422	-7.01904	-7.62939	-6.10352	-4.88281	-7.62939	-4.57764	-8.23975	-5.18799	-6.40869	-4.27246
-7.01904	-3.05176	-8.54492	-6.71387	-6.10352	-5.18799	-6.71387	-7.62939	-6.40869	-3.66211	-7.32422	-6.10352	-6.40869	-3.96729	-3.96729	-7.32422	-6.40869
-10.6812	-4.88281	-5.79834	-7.32422	-6.71387	-5.79834	-6.40869	-8.54492	-8.54492	-5.49316	-6.40869	-5.18799	-6.10352	-6.10352	-4.88281	-6.40869	-8.23975
-8.23975	-4.27246	-7.62939	-7.32422	-4.88281	-4.57764	-10.0708	-9.15527	-9.46045	-6.40869	-4.57764	-8.54492	-3.35693	-6.10352	-5.49316	-6.71387	-6.10352
-8.23975	-6.71387	-7.93457	-5.79834	-8.54492	-5.79834	-8.54492	-8.54492	-7.01904	-5.79834	-4.88281	-7.32422	-6.71387	-3.66211	-3.96729	-7.32422	-4.57764
-7.62939	-9.46045	-7.01904	-9.15527	-8.8501	-7.93457	-5.79834	-8.54492	-8.23975	-7.01904	-4.57764	-5.79834	-6.10352	-3.35693	-7.32422	-6.40869	-8.54492
-6.40869	-7.62939	-6.10352	-9.46045	-7.01904	-7.32422	-7.62939	-7.93457	-10.376	-6.71387	-4.88281	-7.32422	-6.10352	-7.01904	-6.40869	-6.10352	-7.32422
-7.32422	-3.66211	-6.40869	-8.54492	-7.32422	-4.57764	-7.93457	-9.15527	-6.10352	-4.88281	-5.79834	-8.54492	-6.40869	-6.71387	-5.49316	-6.71387	-5.18799
-8.8501	-5.79834	-5.49316	-9.46045	-8.54492	-6.40869	-6.40869	-7.32422	-8.54492	-7.93457	-5.18799	-5.18799	-7.93457	-4.88281	-6.40869	-5.49316	-4.57764
-7.93457	-6.71387	-4.88281	-9.15527	-6.10352	-4.27246	-5.18799	-6.40869	-10.0708	-8.54492	-6.40869	-8.23975	-4.88281	-7.01904	-6.71387	-6.10352	-5.18799
-4.57764	-5.18799	-7.32422	-6.10352	-9.46045	-3.96729	-6.71387	-9.15527	-5.79834	-5.49316	-7.32422	-7.62939	-5.79834	-6.10352	-5.49316	-6.10352	-4.88281
-7.32422	-9.46045	-7.32422	-8.23975	-10.9863	-6.40869	-5.79834	-8.8501	-6.71387	-6.71387	-8.54492	-4.88281	-6.40869	-5.49316	-4.27246	-6.71387	-3.96729
-4.88281	-8.23975	-7.62939	-10.0708	-6.71387	-5.49316	-7.01904	-8.23975	-8.23975	-6.10352	-8.23975	-6.71387	-4.88281	-6.71387	-6.10352	-7.62939	-4.88281
-2.13623	-6.10352	-10.376	-7.01904	-8.54492	-4.88281	-8.54492	-7.01904	-7.93457	-3.05176	-7.32422	-7.32422	-5.79834	-4.88281	-5.79834	-6.10352	-3.35693
-6.71387	-6.40869	-10.0708	-6.10352	-10.6812	-7.01904	-7.01904	-7.93457	-7.62939	-3.96729	-7.01904	-6.10352	-7.01904	-4.88281	-8.54492	-6.10352	-5.79834
-8.23975	-10.0708	-6.10352	-9.15527	-6.71387	-7.01904	-6.40869	-6.71387	-9.46045	-8.23975	-6.40869	-5.18799	-8.23975	-6.71387	-8.54492	-5.79834	-6.71387
-4.88281	-7.01904	-6.40869	-8.23975	-5.79834	-4.88281	-7.32422	-7.01904	-7.62939	-6.71387	-7.93457	-7.93457	-6.10352	-7.01904	-5.79834	-7.62939	-4.57764
-5.18799	-6.10352	-7.32422	-8.54492	-10.0708	-7.62939	-7.62939	-7.93457	-6.40869	-5.79834	-7.01904	-5.79834	-6.40869	-7.32422	-5.18799	-7.32422	-4.27246
-7.62939	-7.01904	-6.40869	-10.376	-8.23975	-7.01904	-7.62939	-7.01904	-7.93457	-6.10352	-5.49316	-6.40869	-4.57764	-9.15527	-6.10352	-7.93457	-4.57764
-3.35693	-3.96729	-8.54492	-6.40869	-5.79834	-4.27246	-7.62939	-8.23975	-6.10352	-4.27246	-6.71387	-7.93457	-3.66211	-7.01904	-5.18799	-5.79834	-6.40869
-5.79834	-5.49316	-10.0708	-7.32422	-10.0708	-6.40869	-3.96729	-7.62939	-7.32422	-5.18799	-7.01904	-6.10352	-5.79834	-5.49316	-4.27246	-6.40869	-3.96729
-8.8501	-7.01904	-6.10352	-9.76563	-7.93457	-9.15527	-5.18799	-8.23975	-10.6812	-7.93457	-5.79834	-6.10352	-4.27246	-8.23975	-6.10352	-6.71387	-4.88281
-5.49316	-4.88281	-5.79834	-7.32422	-5.18799	-5.49316	-7.62939	-8.54492	-8.23975	-6.40869	-5.79834	-6.71387	-3.05176	-6.71387	-5.49316	-7.62939	-6.10352
-3.35693	-2.74658	-8.54492	-7.62939	-6.71387	-7.01904	-7.93457	-7.32422	-4.88281	-3.96729	-5.79834	-3.96729	-5.49316	-4.57764	-5.49316	-5.79834	-7.62939
-6.40869	-5.79834	-9.46045	-7.62939	-7.32422	-7.62939	-6.71387	-7.62939	-6.71387	-9.46045	-3.05176	-4.27246	-6.40869	-7.62939	-5.18799	-7.32422	-6.71387
-5.18799	-4.88281	-6.71387	-5.49316	-5.18799	-6.10352	-6.40869	-6.71387	-9.46045	-8.8501	-4.27246	-7.32422	-7.01904	-9.46045	-3.35693	-7.93457	-5.79834
-5.18799	-3.05176	-8.8501	-6.10352	-7.01904	-6.71387	-8.23975	-7.32422	-6.40869	-5.18799	-6.10352	-5.79834	-5.79834	-4.88281	-5.79834	-6.10352	-6.71387
-7.93457	-6.71387	-5.49316	-7.93457	-8.23975	-8.8501	-6.71387	-7.93457	-7.62939	-6.40869	-5.49316	-5.79834	-5.49316	-4.88281	-7.62939	-7.62939	-6.40869
-4.88281	-5.18799	-5.79834	-8.23975	-4.57764	-6.40869	-7.93457	-7.62939	-6.10352	-6.10352	-3.66211	-9.15527	-3.35693	-9.46045	-5.79834	-8.54492	-6.10352
-2.44141	-4.57764	-8.23975	-6.10352	-6.10352	-4.27246	-7.62939	-7.01904	-4.27246	-3.35693	-4.27246	-8.8501	-5.79834	-6.71387	-5.79834	-9.46045	-5.18799
-3.35693	-7.62939	-6.10352	-8.23975	-6.10352	-5.79834	-5.18799	-6.10352	-5.79834	-3.96729	-4.88281	-7.62939	-7.62939	-5.49316	-7.62939	-6.40869	-4.27246
-3.35693	-5.18799	-5.49316	-5.18799	-5.79834	-3.35693	-6.40869	-5.79834	-7.62939	-5.18799	-6.71387	-9.76563	-6.40869	-7.93457	-6.71387	-6.10352	-3.35693
-3.05176	-3.05176	-8.8501	-4.57764	-6.40869	-4.57764	-5.49316	-8.54492	-4.57764	-3.05176	-9.15527	-8.23975	-5.49316	-7.93457	-7.01904	-7.01904	-5.79834
-4.27246	-6.40869	-8.23975	-4.57764	-8.8501	-7.62939	-5.49316	-8.23975	-4.88281	-7.32422	-6.71387	-3.66211	-5.18799	-10.376	-6.40869	-6.71387	-5.18799
-5.49316	-6.71387	-4.57764	-6.10352	-6.40869	-7.93457	-7.32422	-7.32422	-7.01904	-7.62939	-5.79834	-6.40869	-3.66211	-9.76563	-5.49316	-5.79834	-2.13623
-4.27246	-4.27246	-7.01904	-5.18799	-7.93457	-6.71387	-8.54492	-7.62939	-4.57764	-4.88281	-6.40869	-7.32422	-3.35693	-5.49316	-4.27246	-6.71387	-3.35693
-5.79834	-7.01904	-7.32422	-8.54492	-9.76563	-7.62939	-6.40869	-6.40869	-7.62939	-5.49316	-4.27246	-7.32422	-5.18799	-4.57764	-7.01904	-4.88281	-5.79834
-6.71387	-5.18799	-3.66211	-8.8501	-7.32422	-4.27246	-7.01904	-7.62939	-10.9863	-7.32422	-3.96729	-7.93457	-4.88281	-8.23975	-5.18799	-4.88281	-6.71387
-4.27246	-3.35693	-7.62939	-5.79834	-7.32422	-2.74658	-7.93457	-7.32422	-7.01904	-5.79834	-5.49316	-5.79834	-4.88281	-7.93457	-2.74658	-5.18799	-7.93457
-6.71387	-6.10352	-7.62939	-8.23975	-7.62939	-6.10352	-4.57764	-7.01904	-6.40869	-3.05176	-6.10352	-6.10352	-5.18799	-3.96729	-5.79834	-7.01904	-6.40869
-5.49316	-7.01904	-5.18799	-9.15527	-7.01904	-7.01904	-6.71387	-6.40869	-7.93457	-5.49316	-4.27246	-8.23975	-4.88281	-7.62939	-6.10352	-6.71387	-4.57764
-2.74658	-4.57764	-3.35693	-8.23975	-5.18799	-5.18799	-6.71387	-6.71387	-4.88281	-3.96729	-5.49316	-9.46045	-4.57764	-6.40869	-4.57764	-5.79834	-4.88281
-6.10352	-1.83105	-7.93457	-7.32422	-9.76563	-6.10352	-6.10352	-7.01904	-2.74658	-4.57764	-6.10352	-5.18799	-6.10352	-3.66211	-5.49316	-5.79834	-5.18799
-7.93457	-6.71387	-6.10352	-8.23975	-8.8501	-6.10352	-4.57764	-5.49316	-5.49316	-6.71387	-7.32422	-5.49316	-6.10352	-7.01904	-5.79834	-4.57764	-3.35693
-3.35693	-6.10352	-3.66211	-9.76563	-6.10352	-1.83105	-6.10352	-6.10352	-5.49316	-5.49316	-6.40869	-7.93457	-3.66211	-6.71387	-4.27246	-6.40869	-4.88281
-5.49316	-6.10352	-8.23975	-7.62939	-8.23975	-6.40869	-6.10352	-4.88281	-6.10352	-4.88281	-6.10352	-5.49316	-5.18799	-6.10352	-4.88281	-5.79834	-4.27246
-8.23975	-8.23975	-6.10352	-8.8501	-6.40869	-8.8501	-7.01904	-5.18799	-7.32422	-6.71387	-5.79834	-3.35693	-5.18799	-8.23975	-6.40869	-7.62939	-4.27246
-4.57764	-8.23975	-5.18799	-6.10352	-6.71387	-6.40869	-7.01904	-7.62939	-7.93457	-7.01904	-3.35693	-6.10352	-4.88281	-8.54492	-3.66211	-7.32422	-4.88281
-5.49316	-7.62939	-7.32422	-4.27246	-8.23975	-6.71387	-5.79834	-6.40869	-5.49316	-6.10352	-4.88281	-3.96729	-5.18799	-4.88281	-3.35693	-6.10352	-4.27246
-7.93457	-7.62939	-7.62939	-6.10352	-10.0708	-7.32422	-6.10352	-6.40869	-8.23975	-9.46045	-3.96729	-3.35693	-3.96729	-6.10352	-4.27246	-4.88281	-2.74658
-5.49316	-4.88281	-7.01904	-5.49316	-7.32422	-4.88281	-6.71387	-8.23975	-7.62939	-8.23975	-5.18799	-7.62939	-3.96729	-7.01904	-4.57764	-5.79834	-3.05176
-6.40869	-3.66211	-10.376	-7.32422	-8.23975	-4.27246	-7.01904	-9.76563	-4.57764	-6.10352	-5.79834	-7.62939	-5.49316	-5.79834	-5.18799	-3.66211	-4.88281
-9.76563	-8.54492	-8.8501	-10.0708	-8.54492	-7.01904	-9.15527	-8.8501	-4.88281	-6.40869	-4.57764	-5.49316	-6.40869	-6.10352	-7.32422	-3.66211	-3.35693
-7.01904	-9.15527	-5.79834	-7.01904	-7.32422	-5.79834	-9.15527	-11.5967	-7.93457	-5.49316	-5.49316	-6.71387	-3.66211	-6.40869	-4.88281	-5.18799	-5.79834
-5.18799	-6.40869	-9.46045	-7.01904	-9.76563	-3.66211	-8.8501	-10.6812	-5.79834	-5.18799	-6.40869	-5.79834	-4.88281	-5.79834	-0.91553	-5.18799	-6.71387
-7.32422	-9.46045	-7.62939	-10.0708	-10.0708	-6.40869	-6.40869	-9.15527	-7.32422	-7.01904	-3.35693	-5.79834	-6.10352	-8.23975	-2.13623	-4.27246	-6.40869
-5.18799	-8.8501	-6.10352	-11.2915	-7.32422	-6.71387	-10.376	-8.8501	-10.0708	-7.32422	-2.13623	-8.8501	-6.71387	-8.54492	-3.05176	-6.71387	-4.88281
-4.27246	-7.93457	-8.8501	-7.32422	-7.01904	-4.88281	-9.46045	-7.62939	-7.62939	-4.27246	-4.57764	-5.79834	-6.40869	-5.49316	-3.66211	-7.32422	-6.40869
-5.49316	-6.40869	-8.23975	-7.93457	-8.8501	-6.71387	-5.79834	-7.62939	-8.8501	-4.27246	-4.57764	-3.35693	-5.49316	-6.40869	-6.71387	-5.79834	-7.32422
-7.01904	-6.71387	-4.88281	-7.01904	-8.54492	-6.40869	-6.71387	-7.01904	-8.54492	-7.01904	-5.18799	-5.79834	-3.96729	-8.23975	-5.79834	-5.18799	-3.96729
-5.79834	-4.27246	-7.62939	-5.18799	-7.62939	-5.18799	-7.62939	-8.54492	-7.32422	-7.62939	-7.32422	-6.71387	-3.96729	-6.40869	-4.27246	-8.8501	-3.66211
-8.23975	-8.8501	-8.23975	-7.62939	-10.376	-7.93457	-7.62939	-5.79834	-7.93457	-6.71387	-4.88281	-3.66211	-6.40869	-5.49316	-6.10352	-7.62939	-3.05176
-8.23975	-11.9019	-5.18799	-7.62939	-7.62939	-7.93457	-8.23975	-7.01904	-9.76563	-5.79834	-4.27246	-4.88281	-4.88281	-7.93457	-7.32422	-6.40869	-3.05176
-4.57764	-7.01904	-7.01904	-5.79834	-7.93457	-5.18799	-9.46045	-9.15527	-7.01904	-5.79834	-4.57764	-6.40869	-5.79834	-6.10352	-4.88281	-6.10352	-5.79834
-5.79834	-6.10352	-8.8501	-7.93457	-10.6812	-7.01904	-6.40869	-8.54492	-4.88281	-7.01904	-6.10352	-5.79834	-6.71387	-4.27246	-5.79834	-4.88281	-6.10352
-7.93457	-7.32422	-7.01904	-9.46045	-9.15527	-8.23975	-7.01904	-10.6812	-8.23975	-8.8501	-3.96729	-9.15527	-4.27246	-7.01904	-6.10352	-6.40869	-6.10352
-3.66211	-6.71387	-6.71387	-7.62939	-8.54492	-6.71387	-7.93457	-10.0708	-7.32422	-6.71387	-6.40869	-8.23975	-4.27246	-6.40869	-4.88281	-7.01904	-5.79834
-4.27246	-5.18799	-8.54492	-6.40869	-11.2915	-6.40869	-5.79834	-6.10352	-6.10352	-7.32422	-7.01904	-4.88281	-7.32422	-7.01904	-5.79834	-5.18799	-6.10352
-6.10352	-7.01904	-6.40869	-9.46045	-10.6812	-7.93457	-6.71387	-6.71387	-8.8501	-9.46045	-5.18799	-6.10352	-7.32422	-6.71387	-5.18799	-7.01904	-3.35693
-3.96729	-6.71387	-5.79834	-7.62939	-7.32422	-6.10352	-8.8501	-7.32422	-5.79834	-8.8501	-8.23975	-8.8501	-6.71387	-7.93457	-4.57764	-8.54492	-5.18799
-4.57764	-6.40869	-7.62939	-7.62939	-8.8501	-4.88281	-7.62939	-5.79834	-3.66211	-6.40869	-7.32422	-6.10352	-8.8501	-4.27246	-5.79834	-5.49316	-5.49316
-5.49316	-8.23975	-5.79834	-9.76563	-8.54492	-5.49316	-5.49316	-5.79834	-7.93457	-6.71387	-5.18799	-5.18799	-6.71387	-5.49316	-5.79834	-6.40869	-6.10352
-4.88281	-7.32422	-3.96729	-6.10352	-7.32422	-5.49316	-8.8501	-6.40869	-8.8501	-5.18799	-4.27246	-7.93457	-4.27246	-7.32422	-5.79834	-7.93457	-5.18799
-4.57764	-5.49316	-7.62939	-6.10352	-8.8501	-6.40869	-8.23975	-4.27246	-4.57764	-4.57764	-5.79834	-5.79834	-5.79834	-8.23975	-6.10352	-7.62939	-7.93457
-6.40869	-5.79834	-9.46045	-7.01904	-10.9863	-9.46045	-4.88281	-6.40869	-7.01904	-6.40869	-4.88281	-5.79834	-6.10352	-6.71387	-8.23975	-5.79834	-8.8501
-5.18799	-5.79834	-6.10352	-7.32422	-7.93457	-8.23975	-8.8501	-7.62939	-9.46045	-6.71387	-5.49316	-8.8501	-6.71387	-4.57764	-6.40869	-7.01904	-7.01904
-4.27246	-3.96729	-7.93457	-6.71387	-7.62939	-5.18799	-7.32422	-7.01904	-4.88281	-5.18799	-6.40869	-6.71387	-6.71387	-4.88281	-3.05176	-9.46045	-5.49316
-7.32422	-5.18799	-7.32422	-7.62939	-8.23975	-7.62939	-4.88281	-5.18799	-5.18799	-5.18799	-5.18799	-5.79834	-7.32422	-5.49316	-5.79834	-6.71387	-3.66211
-5.79834	-7.62939	-5.49316	-8.23975	-3.66211	-7.01904	-5.79834	-5.79834	-8.54492	-7.01904	-7.32422	-8.54492	-4.57764	-6.40869	-6.10352	-7.62939	-4.57764
-3.35693	-5.18799	-6.71387	-7.93457	-6.10352	-6.10352	-6.71387	-5.79834	-5.79834	-5.49316	-7.62939	-6.40869	-6.71387	-4.88281	-4.88281	-7.93457	-5.79834
-6.40869	-7.32422	-5.18799	-8.23975	-7.62939	-6.71387	-4.88281	-3.35693	-5.18799	-5.18799	-5.49316	-5.49316	-5.79834	-6.10352	-7.01904	-7.01904	-5.49316
-6.71387	-8.54492	-3.05176	-7.01904	-5.49316	-6.40869	-6.10352	-6.71387	-6.40869	-6.71387	-7.01904	-6.40869	-5.79834	-7.62939	-5.18799	-7.32422	-5.49316
-3.66211	-4.57764	-5.49316	-6.40869	-7.62939	-5.79834	-7.01904	-7.32422	-5.49316	-7.93457	-7.01904	-7.32422	-7.32422	-5.49316	-2.44141	-6.71387	-7.01904
-5.79834	-5.49316	-7.32422	-9.15527	-7.62939	-6.10352	-4.27246	-6.71387	-6.10352	-6.71387	-7.93457	-4.57764	-7.62939	-4.88281	-3.96729	-3.35693	-8.54492
-5.49316	-7.62939	-3.05176	-10.0708	-7.62939	-7.01904	-4.88281	-6.71387	-9.46045	-4.27246	-8.54492	-6.71387	-5.49316	-6.71387	-5.18799	-3.35693	-4.88281
-3.35693	-3.96729	-5.49316	-7.32422	-5.49316	-3.35693	-6.40869	-7.01904	-7.32422	-4.27246	-7.01904	-5.18799	-3.66211	-7.93457	-3.96729	-3.05176	-4.57764
-5.49316	-3.96729	-7.01904	-6.71387	-10.0708	-5.79834	-7.01904	-4.27246	-3.96729	-6.40869	-6.10352	-1.83105	-5.49316	-7.01904	-5.18799	-4.27246	-4.27246
-7.01904	-7.93457	-5.49316	-7.93457	-6.71387	-7.62939	-6.40869	-6.10352	-8.23975	-8.23975	-3.35693	-5.18799	-5.49316	-7.93457	-7.01904	-7.32422	-4.88281
-3.96729	-4.88281	-4.88281	-4.57764	-7.62939	-6.40869	-9.76563	-7.01904	-6.10352	-5.49316	-3.66211	-6.10352	-3.66211	-7.32422	-6.40869	-5.49316	-4.57764
-4.57764	-6.40869	-6.71387	-5.49316	-9.76563	-5.79834	-8.54492	-3.96729	-3.96729	-4.57764	-4.27246	-3.66211	-6.71387	-4.88281	-4.88281	-5.79834	-5.79834
-5.49316	-10.9863	-4.27246	-9.15527	-7.93457	-5.79834	-5.79834	-4.57764	-7.62939	-4.27246	-4.88281	-4.27246	-4.88281	-5.18799	-5.49316	-6.10352	-6.10352
-3.96729	-7.32422	-3.05176	-7.32422	-7.62939	-6.10352	-7.01904	-7.93457	-7.01904	-4.27246	-6.40869	-7.01904	-3.96729	-4.88281	-4.88281	-7.93457	-5.18799
-6.40869	-1.83105	-7.01904	-4.88281	-9.15527	-5.49316	-6.10352	-6.40869	-5.49316	-3.96729	-6.71387	-3.35693	-6.71387	-8.23975	-4.57764	-5.79834	-5.18799
-7.32422	-6.71387	-6.71387	-7.32422	-7.32422	-7.93457	-5.18799	-5.49316	-5.18799	-6.40869	-4.27246	-5.18799	-7.01904	-6.40869	-5.79834	-3.96729	-3.66211
-3.96729	-9.76563	-6.40869	-6.71387	-5.49316	-3.96729	-7.32422	-6.10352	-6.40869	-6.71387	-5.79834	-8.54492	-5.49316	-6.10352	-5.18799	-5.79834	-2.13623
-6.71387	-5.18799	-8.23975	-6.71387	-7.32422	-3.35693	-7.93457	-6.10352	-5.18799	-8.54492	-6.71387	-6.10352	-5.49316	-7.32422	-4.88281	-7.32422	-2.44141
-8.54492	-5.49316	-6.71387	-9.15527	-7.62939	-7.93457	-5.18799	-5.49316	-6.10352	-7.32422	-5.79834	-5.18799	-4.88281	-7.32422	-5.49316	-5.49316	-4.27246
-5.79834	-4.57764	-4.57764	-8.23975	-5.18799	-7.32422	-8.23975	-7.93457	-7.32422	-6.40869	-7.01904	-7.32422	-3.05176	-5.49316	-3.05176	-5.79834	-4.27246
-3.96729	-3.05176	-7.01904	-6.40869	-7.01904	-5.79834	-7.32422	-5.49316	-6.40869	-3.96729	-7.62939	-6.71387	-3.96729	-4.88281	-2.13623	-5.49316	-6.40869
-6.10352	-5.79834	-6.71387	-8.23975	-8.54492	-5.79834	-4.27246	-5.49316	-8.54492	-5.79834	-5.79834	-4.27246	-4.57764	-6.10352	-4.27246	-4.57764	-5.79834
-7.32422	-8.23975	-5.49316	-7.01904	-6.71387	-4.88281	-5.79834	-7.93457	-7.93457	-6.10352	-4.57764	-6.71387	-6.10352	-4.57764	-6.40869	-5.18799	-6.10352
-4.27246	-6.10352	-7.93457	-3.66211	-9.15527	-3.05176	-6.10352	-7.93457	-3.05176	-4.88281	-5.18799	-6.10352	-6.71387	-3.35693	-7.01904	-7.32422	-7.93457
-6.10352	-6.71387	-7.62939	-6.10352	-9.76563	-5.79834	-4.27246	-7.01904	-4.27246	-5.79834	-5.18799	-3.35693	-6.10352	-5.49316	-6.10352	-7.93457	-7.01904
-5.79834	-8.8501	-4.88281	-7.62939	-5.79834	-7.32422	-5.49316	-6.10352	-8.54492	-4.88281	-7.32422	-7.32422	-3.66211	-8.23975	-7.32422	-5.49316	-4.57764
-6.10352	-4.27246	-7.32422	-6.71387	-6.71387	-4.57764	-7.93457	-7.32422	-3.66211	-5.79834	-7.93457	-7.32422	-3.66211	-5.79834	-7.62939	-5.79834	-3.96729
-8.8501	-5.18799	-7.32422	-7.32422	-10.6812	-7.62939	-7.32422	-5.18799	-7.01904	-4.27246	-7.01904	-6.71387	-5.49316	-3.35693	-6.40869	-5.18799	-4.57764
-8.8501	-7.01904	-4.57764	-8.23975	-8.54492	-7.32422	-7.62939	-7.01904	-10.6812	-6.71387	-5.79834	-8.54492	-3.35693	-3.96729	-4.27246	-5.79834	-4.27246
-4.88281	-5.49316	-7.62939	-6.71387	-7.32422	-5.79834	-9.76563	-7.32422	-6.10352	-6.71387	-7.32422	-6.71387	-4.27246	-7.32422	-3.05176	-6.10352	-4.27246
-5.18799	-5.18799	-8.23975	-7.62939	-9.15527	-7.32422	-7.62939	-6.71387	-6.10352	-7.62939	-7.62939	-5.79834	-6.10352	-7.62939	-6.10352	-6.71387	-5.49316
-7.01904	-6.40869	-5.18799	-9.15527	-7.62939	-8.23975	-3.96729	-8.8501	-8.54492	-6.40869	-5.49316	-7.32422	-7.01904	-6.10352	-6.40869	-5.79834	-7.32422
-6.40869	-7.01904	-6.40869	-7.93457	-6.40869	-5.79834	-7.93457	-10.6812	-7.01904	-6.40869	-7.01904	-7.01904	-6.71387	-5.79834	-3.35693	-7.93457	-6.71387
-6.71387	-5.49316	-7.93457	-7.93457	-10.0708	-7.01904	-7.62939	-9.15527	-4.27246	-7.32422	-7.62939	-3.35693	-7.93457	-6.10352	-4.57764	-5.18799	-4.27246
-8.23975	-9.46045	-4.57764	-9.46045	-8.23975	-8.8501	-5.49316	-6.10352	-8.23975	-6.40869	-6.71387	-4.88281	-6.71387	-6.10352	-6.71387	-3.96729	-3.66211
-4.27246	-7.93457	-5.49316	-5.18799	-4.57764	-7.62939	-7.62939	-5.79834	-6.40869	-6.71387	-7.32422	-5.49316	-4.88281	-5.18799	-5.18799	-4.88281	-5.18799
-6.10352	-5.79834	-9.15527	-5.79834	-8.54492	-6.10352	-8.8501	-4.57764	-5.79834	-5.18799	-6.10352	-3.66211	-7.32422	-4.88281	-7.01904	-5.18799	-3.96729
-7.93457	-7.62939	-5.79834	-7.93457	-8.23975	-7.32422	-7.62939	-6.10352	-8.54492	-5.18799	-4.88281	-7.32422	-5.18799	-5.79834	-8.54492	-6.40869	-4.57764
-3.35693	-5.79834	-5.79834	-8.54492	-6.10352	-5.79834	-8.54492	-5.79834	-9.15527	-6.71387	-4.88281	-5.79834	-3.96729	-7.93457	-5.49316	-7.32422	-3.05176
-4.27246	-4.27246	-7.01904	-7.32422	-6.71387	-7.32422	-7.62939	-8.54492	-5.79834	-5.79834	-4.88281	-3.05176	-6.40869	-6.71387	-6.10352	-6.71387	-4.57764
-7.62939	-7.01904	-6.40869	-8.54492	-7.93457	-8.8501	-6.40869	-8.8501	-7.62939	-7.62939	-3.35693	-4.27246	-5.18799	-7.62939	-9.46045	-5.18799	-2.74658
-6.10352	-7.32422	-4.57764	-6.40869	-6.10352	-9.15527	-7.62939	-11.5967	-9.76563	-7.01904	-3.96729	-7.32422	-4.88281	-8.8501	-8.23975	-5.49316	-3.96729
-6.40869	-3.96729	-6.40869	-5.49316	-7.62939	-7.01904	-8.54492	-8.23975	-5.49316	-6.71387	-4.57764	-3.35693	-7.32422	-6.40869	-7.32422	-5.18799	-5.49316
-8.23975	-6.40869	-5.49316	-6.71387	-6.10352	-7.01904	-7.01904	-6.10352	-5.79834	-6.10352	-5.18799	-3.96729	-8.23975	-8.23975	-6.10352	-6.40869	-2.44141
-7.01904	-8.23975	-5.49316	-6.10352	-4.27246	-4.88281	-7.93457	-8.8501	-7.32422	-6.40869	-7.01904	-8.8501	-5.18799	-7.62939	-5.18799	-5.18799	-7.01904
-6.40869	-6.10352	-9.46045	-3.35693	-7.01904	-5.79834	-8.8501	-9.15527	-4.27246	-4.88281	-6.10352	-7.32422	-5.79834	-6.71387	-4.27246	-4.57764	-6.40869
-8.54492	-8.23975	-6.40869	-5.79834	-8.8501	-9.15527	-6.71387	-7.62939	-5.18799	-7.01904	-7.93457	-6.10352	-7.32422	-6.40869	-7.01904	-4.57764	-4.88281
-6.40869	-9.46045	-2.74658	-5.49316	-6.10352	-5.49316	-7.62939	-8.23975	-6.71387	-8.23975	-7.32422	-8.23975	-3.66211	-6.40869	-6.40869	-6.10352	-3.66211
-3.66211	-7.32422	-4.57764	-3.66211	-7.62939	-3.35693	-9.15527	-7.01904	-3.96729	-7.32422	-8.8501	-7.01904	-5.49316	-6.71387	-4.88281	-6.40869	-5.49316
-7.01904	-4.27246	-5.79834	-6.40869	-10.0708	-5.49316	-6.71387	-6.10352	-6.40869	-7.62939	-7.01904	-6.71387	-8.23975	-5.79834	-6.71387	-4.57764	-5.79834
-7.93457	-7.32422	-5.18799	-7.62939	-8.54492	-6.40869	-6.10352	-5.49316	-7.93457	-7.01904	-6.71387	-8.23975	-3.96729	-7.32422	-7.01904	-6.10352	-4.27246
-5.18799	-4.88281	-6.40869	-5.79834	-5.79834	-4.88281	-9.76563	-8.54492	-5.49316	-5.18799	-7.62939	-6.40869	-3.96729	-4.88281	-6.71387	-6.40869	-3.96729
-6.40869	-5.18799	-8.23975	-7.32422	-8.54492	-7.01904	-7.32422	-6.10352	-5.79834	-5.79834	-6.10352	-5.49316	-8.54492	-6.71387	-5.18799	-7.01904	-2.44141
-5.79834	-6.71387	-6.10352	-5.79834	-7.62939	-7.01904	-5.18799	-7.32422	-8.8501	-7.01904	-5.18799	-10.376	-7.32422	-8.23975	-3.96729	-7.32422	-5.18799
-3.35693	-6.10352	-6.40869	-4.27246	-6.40869	-3.66211	-8.8501	-8.54492	-6.71387	-6.71387	-5.49316	-9.76563	-4.88281	-7.93457	-4.88281	-6.71387	-6.40869
-5.49316	-7.62939	-7.32422	-5.49316	-7.93457	-4.88281	-5.79834	-5.49316	-4.57764	-5.79834	-5.79834	-7.32422	-6.71387	-7.32422	-5.49316	-5.49316	-5.79834
-4.88281	-7.62939	-5.18799	-8.54492	-8.8501	-5.49316	-6.10352	-5.18799	-6.40869	-5.18799	-4.88281	-6.10352	-6.10352	-7.62939	-7.32422	-6.10352	-3.35693
-5.18799	-6.10352	-6.40869	-6.71387	-7.62939	-5.49316	-7.93457	-6.10352	-4.88281	-5.79834	-8.23975	-5.79834	-4.88281	-7.93457	-7.01904	-5.49316	-2.74658
-4.88281	-4.27246	-5.18799	-6.71387	-9.76563	-6.71387	-7.32422	-5.79834	-4.57764	-7.62939	-9.15527	-3.96729	-6.10352	-7.93457	-9.15527	-5.49316	-5.18799
-7.62939	-6.40869	-3.35693	-5.79834	-8.54492	-6.10352	-4.88281	-6.71387	-8.23975	-6.10352	-7.93457	-6.71387	-6.10352	-7.62939	-9.15527	-6.40869	-4.57764
-5.79834	-6.40869	-3.35693	-3.66211	-6.40869	-3.05176	-7.01904	-7.32422	-6.10352	-7.01904	-7.32422	-9.76563	-4.57764	-7.93457	-6.10352	-7.01904	-6.40869
-6.40869	-4.57764	-6.10352	-4.57764	-9.46045	-3.35693	-7.01904	-6.10352	-4.27246	-6.40869	-5.79834	-5.79834	-8.8501	-6.71387	-7.01904	-6.40869	-4.88281
-6.10352	-6.71387	-5.79834	-7.32422	-8.54492	-4.57764	-6.40869	-5.79834	-7.62939	-7.01904	-6.40869	-4.88281	-7.93457	-8.8501	-7.01904	-6.40869	-3.96729
-3.96729	-8.8501	-6.10352	-4.27246	-7.01904	-4.57764	-8.8501	-6.71387	-7.32422	-5.18799	-5.49316	-6.40869	-3.96729	-6.71387	-4.88281	-4.57764	-5.18799
-5.18799	-7.32422	-7.32422	-4.88281	-7.32422	-4.57764	-7.01904	-6.40869	-4.27246	-5.49316	-5.49316	-3.35693	-6.40869	-4.88281	-5.18799	-7.93457	-4.57764
-6.10352	-6.40869	-6.71387	-6.71387	-8.23975	-6.40869	-4.27246	-4.88281	-3.35693	-6.40869	-4.57764	-3.96729	-7.01904	-6.40869	-7.93457	-7.32422	-4.27246
-4.57764	-7.01904	-4.88281	-3.96729	-5.18799	-7.32422	-5.18799	-3.35693	-5.18799	-4.27246	-7.93457	-8.8501	-6.10352	-5.49316	-5.49316	-6.71387	-3.35693
-3.66211	-3.35693	-7.01904	-3.66211	-7.01904	-6.10352	-7.93457	-3.96729	-4.57764	-4.57764	-8.8501	-6.40869	-6.71387	-5.79834	-3.96729	-5.79834	-4.88281
-5.79834	-4.57764	-5.79834	-7.32422	-8.54492	-7.32422	-5.49316	-3.35693	-7.62939	-6.40869	-6.71387	-3.96729	-5.79834	-5.49316	-7.62939	-6.10352	-3.96729
-6.10352	-7.62939	-3.66211	-4.88281	-6.10352	-5.79834	-4.88281	-6.40869	-7.93457	-7.62939	-7.32422	-7.32422	-1.83105	-8.8501	-5.49316	-8.23975	-3.35693
-7.32422	-5.79834	-7.01904	-3.66211	-8.23975	-4.88281	-5.18799	-6.10352	-5.49316	-7.01904	-5.79834	-4.27246	-5.79834	-9.15527	-3.35693	-7.62939	-5.49316
-7.93457	-7.32422	-7.93457	-7.93457	-10.376	-7.93457	-3.96729	-6.71387	-4.88281	-8.54492	-5.18799	-3.35693	-7.93457	-7.32422	-6.71387	-8.54492	-5.79834
-8.23975	-6.40869	-3.96729	-6.71387	-8.54492	-4.88281	-5.79834	-7.32422	-5.18799	-6.10352	-6.10352	-7.62939	-3.05176	-6.71387	-6.71387	-6.40869	-4.27246
-5.79834	-3.35693	-5.79834	-6.40869	-7.32422	-4.88281	-4.57764	-5.79834	-3.35693	-4.27246	-7.01904	-7.32422	-3.96729	-5.18799	-2.74658	-5.49316	-5.49316
-5.18799	-3.35693	-6.10352	-5.18799	-10.6812	-8.54492	-4.57764	-5.49316	-5.18799	-6.71387	-5.79834	-3.96729	-6.71387	-5.49316	-5.18799	-6.40869	-5.49316
-5.49316	-7.01904	-3.35693	-6.10352	-7.01904	-6.71387	-4.88281	-4.27246	-8.8501	-7.01904	-4.27246	-6.10352	-5.49316	-4.57764	-7.01904	-7.01904	-4.88281
-6.40869	-6.40869	-4.27246	-3.96729	-6.71387	-1.83105	-7.93457	-7.01904	-6.40869	-5.18799	-5.79834	-6.40869	-4.27246	-7.32422	-4.88281	-7.01904	-4.88281
-7.32422	-4.57764	-7.32422	-3.96729	-8.23975	-3.35693	-5.49316	-4.88281	-5.49316	-5.49316	-3.05176	-3.05176	-6.71387	-7.93457	-7.01904	-5.49316	-2.13623
-5.18799	-4.27246	-3.96729	-6.71387	-7.93457	-5.49316	-4.88281	-4.57764	-7.01904	-7.01904	-4.57764	-7.01904	-4.27246	-7.62939	-6.71387	-4.57764	-3.96729
-5.18799	-3.05176	-3.66211	-4.27246	-5.79834	-4.88281	-7.62939	-5.49316	-3.66211	-5.49316	-6.10352	-7.93457	-2.74658	-7.01904	-5.79834	-5.18799	-6.71387
-7.32422	-4.88281	-6.71387	-5.79834	-6.40869	-7.62939	-5.49316	-3.66211	-4.27246	-6.71387	-6.71387	-5.49316	-6.40869	-5.79834	-5.18799	-6.71387	-5.79834
-6.71387	-7.62939	-6.40869	-7.01904	-7.62939	-6.71387	-4.88281	-5.79834	-8.8501	-7.32422	-6.10352	-7.32422	-4.88281	-7.62939	-4.57764	-5.79834	-5.49316
-5.18799	-6.71387	-5.18799	-5.49316	-3.96729	-5.79834	-7.01904	-6.10352	-7.01904	-4.27246	-7.01904	-7.93457	-4.27246	-6.10352	-3.05176	-4.88281	-7.01904
-4.57764	-4.57764	-8.23975	-6.40869	-7.62939	-4.88281	-5.79834	-7.01904	-5.49316	-4.57764	-4.57764	-3.96729	-6.71387	-4.88281	-2.44141	-5.18799	-6.10352
-4.88281	-7.01904	-6.40869	-7.32422	-8.23975	-6.10352	-6.10352	-5.79834	-8.54492	-6.10352	-4.57764	-3.05176	-6.71387	-4.88281	-4.57764	-3.66211	-3.96729
-4.57764	-6.71387	-4.27246	-3.96729	-5.79834	-3.35693	-7.93457	-6.10352	-6.71387	-5.18799	-7.32422	-6.10352	-3.66211	-8.23975	-2.74658	-4.88281	-4.27246
-7.32422	-5.79834	-6.71387	-7.01904	-7.32422	-6.71387	-6.10352	-3.66211	-5.18799	-5.79834	-6.71387	-4.27246	-5.79834	-7.93457	-3.05176	-5.79834	-4.88281
-6.10352	-8.8501	-7.01904	-9.15527	-8.23975	-9.76563	-4.27246	-3.96729	-7.93457	-7.93457	-4.88281	-3.96729	-7.01904	-5.79834	-6.10352	-4.88281	-4.27246
-5.18799	-8.54492	-5.79834	-9.76563	-5.49316	-5.79834	-7.32422	-9.15527	-7.32422	-7.01904	-5.49316	-5.49316	-2.74658	-4.57764	-4.27246	-4.88281	-4.57764
-5.79834	-10.6812	-8.23975	-7.93457	-5.79834	-7.62939	-5.49316	-5.49316	-6.10352	-5.18799	-7.93457	-4.27246	-7.01904	-4.57764	-1.83105	-6.10352	-4.88281
-6.10352	-8.8501	-5.49316	-7.93457	-9.46045	-7.01904	-5.18799	-3.66211	-7.93457	-5.49316	-5.79834	-6.10352	-8.23975	-6.40869	-6.40869	-6.40869	-5.49316
-6.10352	-7.93457	-5.49316	-6.40869	-7.93457	-5.49316	-7.62939	-7.01904	-5.79834	-4.88281	-6.71387	-8.54492	-4.88281	-4.27246	-5.49316	-3.96729	-4.57764
-6.10352	-6.71387	-7.62939	-6.71387	-7.93457	-5.79834	-7.93457	-7.93457	-2.44141	-3.96729	-6.40869	-5.18799	-4.88281	-5.49316	-5.18799	-6.40869	-5.49316
-6.40869	-6.71387	-9.46045	-6.10352	-8.54492	-9.46045	-4.88281	-6.10352	-5.79834	-5.18799	-5.49316	-2.44141	-7.32422	-5.18799	-7.93457	-5.18799	-3.05176
-5.49316	-9.15527	-6.10352	-5.79834	-8.8501	-5.49316	-6.71387	-5.79834	-4.27246	-4.27246	-5.79834	-7.01904	-7.01904	-6.10352	-6.40869	-5.18799	-2.44141
-4.27246	-7.32422	-6.40869	-5.49316	-9.76563	-4.88281	-10.9863	-6.71387	-1.83105	-4.27246	-5.49316	-6.10352	-6.71387	-6.71387	-4.88281	-5.18799	-4.27246
-4.88281	-7.93457	-8.23975	-9.76563	-7.62939	-7.62939	-4.88281	-6.10352	-6.10352	-7.01904	-5.18799	-3.66211	-9.76563	-7.32422	-6.10352	-5.49316	-3.66211
-4.57764	-7.93457	-7.32422	-8.54492	-6.40869	-5.18799	-4.27246	-8.23975	-8.23975	-6.40869	-3.96729	-5.18799	-6.40869	-7.62939	-7.01904	-5.79834	-5.79834
-5.18799	-8.8501	-7.62939	-3.96729	-6.40869	-3.96729	-5.79834	-7.93457	-5.18799	-4.27246	-4.88281	-6.40869	-4.88281	-6.10352	-3.96729	-5.49316	-7.32422
-4.27246	-9.15527	-7.32422	-6.40869	-8.8501	-5.49316	-6.40869	-3.05176	-6.71387	-6.71387	-6.40869	-5.79834	-7.01904	-6.40869	-6.71387	-8.23975	-7.62939
-4.27246	-9.15527	-5.18799	-7.32422	-10.0708	-7.01904	-6.40869	-5.18799	-8.23975	-7.32422	-7.32422	-7.32422	-6.40869	-4.88281	-8.23975	-6.71387	-6.10352
-5.18799	-7.62939	-8.23975	-7.01904	-6.40869	-5.49316	-6.71387	-8.8501	-6.10352	-4.88281	-6.71387	-7.32422	-7.32422	-4.88281	-4.88281	-7.32422	-6.40869
-5.49316	-7.01904	-10.376	-5.79834	-5.18799	-6.71387	-6.10352	-4.88281	-5.79834	-5.79834	-4.57764	-3.96729	-9.46045	-5.79834	-6.40869	-6.10352	-7.93457
-3.66211	-9.15527	-6.10352	-7.01904	-5.18799	-4.88281	-3.35693	-4.27246	-7.93457	-7.62939	-5.18799	-5.79834	-7.62939	-5.49316	-6.71387	-6.10352	-5.18799
-5.49316	-7.32422	-6.71387	-6.10352	-7.01904	-2.13623	-8.23975	-7.32422	-6.10352	-3.66211	-6.71387	-8.8501	-4.57764	-6.40869	-2.74658	-6.71387	-4.57764
-4.88281	-5.79834	-8.23975	-6.71387	-10.0708	-5.79834	-8.23975	-5.79834	-4.88281	-3.05176	-6.10352	-5.79834	-7.62939	-6.71387	-4.88281	-6.40869	-3.96729
-5.79834	-5.79834	-6.71387	-7.32422	-8.54492	-6.71387	-7.62939	-6.10352	-7.93457	-5.18799	-5.18799	-4.88281	-7.93457	-6.71387	-6.40869	-6.40869	-4.27246
-6.40869	-9.46045	-6.71387	-5.49316	-4.57764	-6.10352	-8.23975	-10.376	-5.79834	-3.66211	-6.71387	-6.71387	-4.88281	-5.79834	-4.88281	-3.96729	-3.35693
-4.57764	-8.54492	-7.93457	-5.79834	-7.01904	-6.71387	-7.62939	-8.8501	-3.96729	-4.57764	-8.8501	-4.88281	-7.01904	-6.71387	-5.18799	-6.10352	-7.01904
-2.74658	-7.32422	-6.10352	-7.01904	-8.54492	-7.32422	-6.10352	-7.01904	-7.62939	-5.18799	-7.93457	-4.57764	-7.32422	-7.32422	-6.71387	-4.88281	-4.88281
-7.01904	-7.01904	-5.49316	-4.88281	-7.32422	-6.40869	-6.71387	-8.8501	-6.10352	-5.18799	-9.46045	-8.54492	-5.18799	-6.10352	-3.35693	-7.62939	-6.40869
-8.23975	-5.49316	-8.23975	-4.57764	-9.76563	-4.88281	-8.54492	-7.62939	-6.10352	-4.88281	-6.40869	-6.71387	-6.40869	-5.49316	-3.96729	-7.32422	-7.01904
-5.18799	-6.40869	-8.8501	-8.23975	-8.8501	-7.01904	-4.27246	-6.10352	-7.93457	-6.71387	-4.57764	-3.66211	-6.71387	-6.40869	-7.32422	-7.01904	-4.27246
-4.88281	-6.71387	-7.01904	-6.71387	-4.57764	-3.96729	-7.62939	-9.76563	-7.01904	-4.57764	-5.18799	-8.54492	-4.27246	-7.93457	-7.01904	-6.10352	-2.13623
-4.27246	-5.18799	-7.62939	-6.40869	-7.32422	-3.35693	-10.0708	-6.71387	-4.88281	-3.66211	-7.32422	-8.8501	-7.01904	-7.32422	-5.79834	-6.10352	-3.96729
-5.18799	-6.10352	-7.01904	-7.93457	-8.8501	-6.10352	-4.57764	-4.88281	-6.40869	-7.32422	-5.79834	-6.71387	-9.76563	-5.79834	-5.49316	-7.32422	-3.35693
-6.10352	-6.71387	-4.27246	-5.79834	-8.8501	-5.49316	-5.49316	-5.79834	-6.10352	-6.71387	-6.40869	-9.15527	-6.71387	-4.27246	-4.88281	-4.88281	-3.05176
-5.79834	-5.79834	-6.40869	-5.18799	-6.40869	-3.35693	-7.93457	-7.01904	-1.83105	-3.96729	-6.71387	-6.10352	-4.57764	-6.10352	-5.49316	-6.40869	-7.93457
-5.49316	-5.79834	-7.32422	-5.79834	-7.01904	-6.10352	-7.62939	-5.18799	-5.18799	-7.62939	-4.57764	-3.05176	-6.71387	-5.49316	-5.79834	-4.88281	-6.10352
-4.57764	-6.10352	-8.23975	-6.71387	-6.71387	-5.49316	-5.79834	-6.71387	-6.71387	-7.32422	-7.01904	-6.40869	-6.40869	-4.57764	-7.62939	-3.35693	-1.83105
-6.40869	-6.10352	-8.54492	-4.57764	-6.10352	-1.52588	-10.6812	-9.15527	-5.49316	-4.88281	-7.01904	-6.40869	-4.57764	-5.79834	-4.88281	-4.88281	-3.66211
-5.49316	-8.23975	-7.62939	-6.40869	-6.40869	-5.18799	-6.71387	-4.88281	-7.62939	-7.01904	-6.10352	-3.05176	-8.54492	-7.01904	-5.49316	-5.18799	-4.88281
-3.66211	-8.8501	-4.88281	-6.10352	-6.71387	-5.79834	-4.27246	-6.40869	-8.8501	-6.71387	-5.49316	-3.35693	-3.35693	-7.01904	-5.18799	-5.79834	-5.49316
-6.10352	-7.32422	-6.71387	-3.66211	-6.71387	-5.49316	-6.40869	-7.93457	-5.18799	-3.66211	-5.18799	-6.10352	-3.35693	-6.71387	-4.88281	-6.10352	-5.49316
-4.88281	-6.40869	-6.10352	-5.18799	-7.93457	-6.40869	-7.01904	-5.49316	-6.40869	-5.79834	-4.27246	-3.66211	-7.62939	-8.23975	-6.71387	-7.62939	-5.18799
-2.44141	-8.54492	-5.79834	-7.01904	-9.76563	-8.23975	-6.10352	-4.88281	-5.79834	-6.40869	-4.27246	-3.35693	-5.49316	-4.27246	-6.40869	-3.35693	-6.10352
-5.18799	-9.46045	-6.40869	-7.32422	-5.79834	-5.18799	-7.01904	-8.54492	-3.05176	-5.18799	-5.49316	-6.10352	-5.49316	-4.27246	-5.79834	-3.66211	-3.96729
-6.40869	-8.8501	-5.49316	-5.79834	-6.71387	-6.10352	-6.10352	-7.93457	-4.27246	-6.10352	-4.57764	-5.18799	-6.71387	-5.18799	-4.27246	-4.57764	-5.18799
-6.71387	-8.54492	-3.35693	-6.40869	-4.27246	-9.15527	-2.44141	-6.40869	-7.62939	-6.10352	-3.35693	-6.10352	-7.93457	-7.93457	-5.79834	-6.40869	-3.66211
-6.10352	-6.71387	-4.27246	-7.01904	-4.57764	-5.49316	-6.10352	-8.54492	-6.71387	-4.27246	-6.40869	-7.01904	-3.96729	-7.32422	-3.05176	-7.62939	-5.18799
-5.49316	-5.49316	-7.01904	-7.93457	-8.23975	-5.49316	-6.71387	-5.79834	-6.10352	-4.57764	-5.49316	-3.05176	-6.10352	-7.01904	-4.27246	-6.71387	-5.18799
-4.88281	-7.62939	-5.79834	-8.23975	-9.46045	-6.40869	-5.18799	-4.88281	-7.01904	-7.62939	-4.57764	-3.05176	-6.40869	-4.88281	-7.32422	-6.40869	-4.27246
-6.10352	-8.23975	-6.71387	-4.88281	-7.93457	-5.79834	-7.93457	-7.32422	-4.88281	-3.66211	-4.27246	-4.88281	-3.96729	-4.57764	-5.49316	-4.57764	-4.88281
-5.49316	-7.32422	-7.62939	-4.57764	-8.23975	-5.18799	-7.93457	-7.32422	-5.79834	-3.96729	-5.18799	-6.40869	-6.40869	-3.96729	-5.18799	-5.49316	-5.18799
-4.27246	-7.01904	-5.49316	-7.32422	-10.6812	-6.71387	-7.32422	-6.10352	-7.62939	-6.40869	-3.35693	-5.18799	-6.71387	-2.13623	-5.49316	-5.18799	-4.88281
-6.71387	-7.93457	-6.10352	-6.71387	-8.23975	-4.88281	-6.10352	-7.32422	-4.88281	-4.57764	-4.88281	-8.23975	-3.05176	-4.27246	-5.18799	-6.10352	-2.44141
-7.01904	-6.71387	-7.62939	-5.79834	-7.32422	-5.49316	-7.93457	-7.62939	-1.2207	-5.49316	-3.96729	-8.23975	-4.57764	-3.35693	-6.10352	-5.79834	-5.49316
-3.96729	-5.79834	-7.93457	-7.01904	-8.54492	-7.01904	-3.96729	-5.49316	-6.40869	-7.32422	-3.05176	-7.01904	-9.15527	-4.57764	-8.23975	-4.88281	-4.57764
-5.49316	-5.49316	-7.93457	-5.18799	-8.8501	-6.71387	-6.40869	-7.32422	-6.40869	-5.79834	-5.18799	-6.40869	-4.88281	-5.18799	-6.71387	-4.57764	-5.18799
-7.62939	-8.23975	-7.93457	-3.96729	-8.23975	-4.27246	-9.76563	-6.40869	-2.13623	-1.83105	-5.18799	-5.18799	-5.18799	-5.18799	-5.49316	-4.57764	-3.66211
-5.18799	-10.0708	-7.32422	-7.93457	-6.71387	-6.71387	-7.62939	-4.27246	-5.18799	-3.35693	-4.27246	-2.74658	-7.93457	-5.79834	-6.71387	-5.79834	-4.57764
-5.18799	-9.76563	-6.71387	-10.9863	-7.62939	-8.54492	-8.8501	-6.40869	-6.40869	-3.96729	-5.18799	-4.57764	-5.18799	-6.10352	-4.57764	-2.74658	-4.57764
-8.54492	-7.01904	-7.93457	-6.10352	-7.01904	-6.10352	-8.8501	-8.54492	-3.96729	-3.05176	-6.40869	-6.10352	-2.74658	-6.10352	-5.18799	-4.27246	-4.57764
-16.7847	-37.5366	-53.4058	-84.5337	-45.4712	-54.9316	-54.6265	-86.6699	-26.8555	-63.1714	-71.4111	-66.5283	-18.0054	-25.9399	-24.1089	-61.3403	-55.2368
-179.749	-217.896	-218.811	-270.386	-226.135	-232.849	-231.323	-266.418	-192.261	-278.32	-272.522	-242.92	-199.28	-196.533	-140.381	-220.032	-249.329
-259.399	-271.301	-242.92	-256.958	-283.508	-265.198	-263.977	-268.86	-250.549	-312.5	-300.598	-248.413	-281.677	-278.931	-218.811	-269.47	-281.677
-193.787	-193.481	-169.678	-167.236	-214.233	-198.059	-187.073	-182.495	-188.904	-218.811	-207.52	-168.457	-213.013	-218.201	-184.021	-211.487	-197.449
-120.544	-108.948	-104.065	-97.3511	-132.446	-130.31	-120.544	-113.22	-117.493	-127.258	-118.713	-106.812	-136.414	-132.141	-120.85	-138.855	-118.408
-73.2422	-59.8145	-57.9834	-54.9316	-75.0732	-79.6509	-78.7353	-60.73	-73.2422	-68.3594	-58.2886	-66.5283	-83.0078	-72.3267	-75.3784	-85.144	-68.6646
-34.4849	-29.9072	-24.4141	-29.602	-40.5884	-39.978	-43.6401	-23.1934	-38.7573	-30.8227	-23.4985	-35.0952	-45.7764	-40.8935	-50.354	-47.3023	-35.0952
-3.96729	-3.35693	-1.83105	-13.1226	-18.6157	-12.5122	-21.0571	-4.27246	-12.5122	-2.74658	1.2207	-9.46045	-13.7329	-16.4795	-29.2969	-19.8364	-8.54492
6.71387	8.8501	7.93457	0.91553	-2.74658	9.76563	-8.23975	7.62939	3.96729	12.8174	18.6157	-1.2207	9.46045	6.71387	-9.76563	-3.96729	6.40869
12.5122	17.7002	9.46045	9.76563	10.376	18.6157	1.83105	16.7847	14.9536	17.0898	25.6348	9.15527	19.8364	21.3623	6.10352	7.93457	13.1226
24.4141	24.7192	10.376	14.0381	16.7847	18.3105	8.8501	21.3623	15.564	20.752	32.3486	19.5312	25.9399	29.2969	12.207	18.6157	21.9727
25.9399	26.2451	9.46045	16.4795	19.5312	21.0571	9.76563	20.4468	22.2778	27.4658	36.0107	17.0898	32.3486	28.0762	18.9209	24.1089	26.5503
25.0244	25.9399	7.01904	18.6157	19.8364	19.8364	8.8501	24.4141	21.6675	29.9072	35.7056	21.0571	31.7383	25.3296	18.6157	25.3296	28.6865
26.8555	23.8037	1.83105	13.7329	18.6157	15.564	8.23975	24.4141	16.7847	24.7192	33.8745	23.4985	27.1606	23.4985	18.3105	25.3296	29.2969
21.9727	19.8364	-3.05176	13.7329	19.2261	13.4277	1.2207	20.4468	19.2261	24.4141	29.602	21.0571	27.771	21.0571	19.8364	24.1089	28.0762
18.9209	13.7329	-5.79834	14.0381	18.0054	11.5967	-2.74658	18.6157	14.3433	20.1416	25.9399	17.395	22.583	16.4795	17.0898	20.752	26.2451
19.8364	10.0708	-8.54492	6.10352	13.7329	5.49316	-2.44141	13.7329	8.23975	13.4277	25.3296	15.564	15.2588	14.6484	14.3433	18.3105	22.8882
16.1743	7.01904	-12.5122	0	8.8501	1.2207	-6.10352	7.62939	6.10352	11.9019	22.2778	10.376	13.1226	11.2915	10.6812	15.564	23.1934
10.6812	5.49316	-16.4795	-1.83105	1.52588	3.66211	-10.9863	4.88281	7.01904	8.23975	19.5312	6.10352	11.5967	6.10352	5.79834	10.0708	17.7002
10.0708	1.83105	-22.2778	-2.74658	-2.13623	-1.83105	-12.8174	3.35693	-1.83105	0.91553	15.564	5.49316	3.96729	2.74658	0	6.10352	14.0381
3.05176	-2.74658	-25.3296	-5.49316	-4.57764	-6.10352	-13.1226	-1.52588	-5.49316	-2.74658	12.8174	1.2207	2.74658	-0.30518	-2.13623	1.52588	14.0381
-3.66211	-6.10352	-25.0244	-9.46045	-8.54492	-7.62939	-15.2588	-3.35693	-3.35693	-1.52588	10.376	-1.2207	1.83105	-3.66211	-3.66211	-1.2207	12.8174
-4.88281	-6.71387	-26.8555	-14.3433	-10.9863	-10.6812	-11.9019	-3.05176	-7.93457	-4.88281	8.54492	3.96729	-1.52588	-4.27246	-8.54492	-5.49316	11.9019
-7.93457	-6.40869	-26.8555	-15.564	-10.376	-13.4277	-15.2588	-8.23975	-11.9019	-4.27246	8.8501	2.13623	-5.18799	-7.01904	-10.376	-6.71387	10.0708
-11.9019	-12.5122	-27.771	-14.0381	-11.2915	-12.207	-19.8364	-10.6812	-12.8174	-3.96729	5.49316	0.30518	-5.49316	-11.9019	-8.54492	-8.54492	8.23975
-10.0708	-14.9536	-30.8227	-18.3105	-17.0898	-13.4277	-18.9209	-12.8174	-17.0898	-7.32422	3.66211	-0.30518	-9.15527	-15.2588	-14.0381	-10.9863	5.18799
-11.9019	-17.395	-34.1797	-21.6675	-16.4795	-16.7847	-18.3105	-16.1743	-21.9727	-10.6812	1.2207	-1.2207	-12.207	-14.9536	-15.8691	-12.8174	4.57764
-17.0898	-18.3105	-33.2642	-20.752	-15.2588	-14.9536	-24.1089	-17.0898	-18.9209	-7.93457	-3.35693	-4.27246	-8.8501	-16.1743	-15.564	-15.8691	3.35693
-15.564	-20.1416	-32.6538	-20.4468	-15.2588	-16.7847	-25.0244	-14.9536	-21.9727	-10.0708	-3.35693	-3.66211	-12.5122	-17.0898	-15.8691	-15.564	0.61035
-14.0381	-22.8882	-32.6538	-23.4985	-16.4795	-19.2261	-25.6348	-18.0054	-25.9399	-9.46045	-8.23975	-6.10352	-11.9019	-18.0054	-16.4795	-17.0898	-1.2207
-17.7002	-22.2778	-28.6865	-25.0244	-15.8691	-18.9209	-30.2124	-21.0571	-24.1089	-4.57764	-10.0708	-9.15527	-9.76563	-20.1416	-18.9209	-18.6157	-3.66211
-19.2261	-26.8555	-28.6865	-25.3296	-15.2588	-20.4468	-29.9072	-18.6157	-26.8555	-6.40869	-8.8501	-7.62939	-11.2915	-23.1934	-19.5312	-21.9727	-7.93457
-17.395	-25.0244	-30.2124	-28.3814	-17.395	-25.3296	-28.3814	-20.4468	-28.0762	-7.93457	-8.54492	-8.23975	-12.207	-26.8555	-18.9209	-21.9727	-8.23975
-18.6157	-27.4658	-32.959	-31.1279	-15.2588	-25.9399	-30.2124	-21.9727	-25.3296	-3.96729	-10.6812	-10.376	-9.15527	-26.2451	-18.0054	-20.752	-6.10352
-20.752	-27.1606	-33.2642	-32.6538	-17.0898	-21.9727	-31.1279	-21.0571	-24.7192	-4.57764	-11.2915	-8.54492	-10.0708	-24.7192	-17.7002	-22.2778	-7.93457
-20.1416	-25.6348	-33.8745	-31.7383	-20.1416	-25.3296	-30.2124	-21.6675	-27.4658	-7.62939	-11.9019	-6.71387	-12.207	-22.2778	-20.752	-23.1934	-9.15527
-25.3296	-22.583	-34.79	-29.9072	-19.8364	-23.1934	-34.79	-22.583	-24.7192	-4.88281	-14.6484	-10.0708	-10.376	-23.4985	-18.9209	-25.0244	-7.93457
-27.4658	-23.4985	-34.1797	-28.0762	-20.4468	-22.8882	-36.6211	-18.3105	-21.9727	-3.35693	-14.0381	-9.46045	-12.8174	-25.3296	-20.4468	-22.583	-10.0708
-24.7192	-25.3296	-35.0952	-30.5176	-19.5312	-23.4985	-32.6538	-17.0898	-25.6348	-7.32422	-15.564	-9.15527	-14.0381	-24.1089	-21.6675	-22.2778	-13.1226
-25.3296	-21.6675	-34.4849	-29.2969	-19.8364	-21.3623	-32.0435	-19.2261	-21.0571	-6.40869	-17.0898	-13.4277	-11.5967	-23.1934	-18.9209	-22.583	-11.5967
-26.2451	-24.1089	-32.6538	-29.602	-20.1416	-21.0571	-31.7383	-16.1743	-18.9209	-5.79834	-18.3105	-13.1226	-10.6812	-24.7192	-18.6157	-23.8037	-12.207
-24.4141	-25.3296	-33.5693	-31.4331	-21.3623	-21.3623	-28.0762	-12.5122	-20.1416	-10.376	-16.1743	-10.0708	-14.3433	-25.0244	-19.8364	-25.3296	-13.7329
-26.2451	-26.8555	-32.3486	-30.2124	-21.6675	-23.4985	-27.4658	-16.1743	-20.1416	-10.0708	-17.7002	-12.8174	-14.3433	-23.8037	-20.4468	-27.1606	-14.3433
-25.6348	-24.7192	-31.1279	-29.2969	-20.4468	-20.752	-31.4331	-15.8691	-20.4468	-8.8501	-18.6157	-16.7847	-11.9019	-25.9399	-21.3623	-26.8555	-12.5122
-21.3623	-24.4141	-29.2969	-29.9072	-21.3623	-22.8882	-28.0762	-14.9536	-22.583	-11.5967	-15.8691	-14.0381	-15.2588	-25.3296	-23.4985	-27.4658	-14.0381
-21.6675	-25.6348	-30.5176	-28.6865	-21.0571	-25.0244	-26.8555	-18.0054	-25.3296	-8.23975	-18.0054	-17.0898	-15.564	-23.8037	-22.583	-29.9072	-13.7329
-22.8882	-25.6348	-27.771	-23.4985	-19.8364	-21.9727	-29.2969	-19.8364	-24.4141	-6.40869	-18.9209	-20.4468	-14.0381	-25.9399	-22.8882	-26.8555	-14.3433
-21.0571	-26.2451	-27.4658	-22.8882	-21.0571	-21.3623	-27.771	-19.5312	-28.6865	-8.54492	-20.4468	-18.6157	-16.7847	-26.8555	-25.3296	-25.9399	-14.6484
-24.7192	-24.4141	-28.0762	-24.7192	-22.583	-23.8037	-27.1606	-20.1416	-29.602	-9.76563	-22.2778	-20.1416	-16.1743	-27.771	-26.2451	-24.7192	-14.0381
-26.8555	-23.1934	-26.5503	-24.7192	-22.2778	-23.1934	-28.0762	-18.3105	-29.2969	-3.96729	-26.8555	-23.4985	-14.3433	-31.1279	-25.9399	-25.3296	-11.9019
-24.4141	-22.2778	-26.8555	-28.0762	-21.6675	-22.8882	-25.9399	-15.2588	-32.959	-5.18799	-28.3814	-18.3105	-15.564	-30.8227	-25.3296	-23.8037	-14.3433
-24.7192	-20.4468	-27.4658	-28.0762	-20.752	-24.4141	-23.4985	-15.8691	-36.3159	-4.88281	-25.6348	-15.564	-14.6484	-29.2969	-24.7192	-22.583	-16.1743
-28.0762	-20.4468	-27.771	-27.771	-18.0054	-23.4985	-28.0762	-15.564	-32.3486	-1.52588	-26.2451	-16.1743	-10.6812	-29.602	-23.8037	-24.7192	-15.564
-26.8555	-20.752	-26.2451	-29.2969	-16.7847	-25.0244	-27.4658	-14.3433	-31.4331	-3.35693	-25.0244	-14.9536	-13.7329	-30.5176	-24.1089	-25.0244	-17.0898
-24.7192	-19.5312	-27.4658	-34.1797	-19.2261	-29.602	-24.7192	-16.4795	-31.7383	-4.57764	-24.1089	-14.6484	-14.0381	-28.0762	-24.4141	-27.771	-20.4468
-25.9399	-14.9536	-25.9399	-34.4849	-18.6157	-28.3814	-27.4658	-20.4468	-27.771	-0.91553	-23.8037	-18.9209	-13.4277	-29.602	-23.4985	-27.1606	-19.2261
-24.4141	-16.7847	-26.5503	-35.0952	-18.0054	-25.3296	-25.0244	-15.8691	-27.1606	-1.2207	-20.1416	-18.6157	-17.0898	-29.602	-25.6348	-23.1934	-17.395
-23.4985	-16.4795	-27.771	-36.9263	-18.6157	-28.6865	-23.8037	-13.4277	-30.2124	-2.74658	-19.2261	-16.4795	-17.7002	-26.8555	-24.7192	-23.8037	-17.395
-25.3296	-16.7847	-28.6865	-32.959	-19.2261	-25.6348	-26.5503	-16.4795	-28.3814	-3.35693	-19.2261	-19.8364	-15.8691	-25.6348	-21.3623	-25.9399	-14.3433
-22.8882	-19.5312	-30.2124	-29.9072	-19.5312	-24.4141	-25.3296	-14.0381	-28.0762	-5.79834	-21.0571	-18.6157	-18.0054	-28.9917	-20.1416	-27.1606	-16.7847
-20.1416	-20.1416	-28.9917	-30.5176	-21.6675	-27.771	-21.9727	-15.8691	-30.2124	-10.0708	-18.3105	-16.4795	-22.2778	-28.0762	-22.2778	-28.0762	-17.0898
-22.8882	-19.2261	-29.2969	-33.2642	-20.4468	-26.5503	-19.5312	-17.7002	-28.9917	-9.46045	-20.1416	-21.3623	-19.8364	-26.2451	-21.0571	-27.771	-17.395
-22.8882	-19.5312	-26.8555	-34.4849	-18.6157	-23.4985	-18.3105	-15.564	-23.8037	-9.15527	-19.8364	-20.752	-18.9209	-27.4658	-18.6157	-24.7192	-16.7847
-18.9209	-19.5312	-26.5503	-38.147	-18.6157	-24.1089	-14.9536	-15.8691	-24.1089	-13.4277	-18.3105	-20.752	-21.6675	-25.9399	-17.7002	-23.4985	-20.4468
-23.1934	-14.9536	-23.4985	-36.9263	-18.3105	-25.6348	-17.7002	-16.7847	-22.583	-14.3433	-20.752	-21.6675	-21.6675	-26.5503	-12.8174	-25.9399	-18.9209
-25.3296	-15.2588	-21.3623	-36.0107	-19.2261	-22.2778	-21.0571	-16.4795	-20.4468	-13.1226	-22.2778	-23.1934	-22.583	-28.6865	-13.7329	-24.1089	-18.3105
-22.8882	-17.395	-23.4985	-39.0625	-19.8364	-24.1089	-20.1416	-14.3433	-24.7192	-17.7002	-21.9727	-23.1934	-25.0244	-26.5503	-12.8174	-23.4985	-22.8882
-21.3623	-16.7847	-23.4985	-40.5884	-20.1416	-23.4985	-18.9209	-17.0898	-28.3814	-18.9209	-23.4985	-22.2778	-23.1934	-22.2778	-12.5122	-25.9399	-23.4985
-21.9727	-17.7002	-22.2778	-38.7573	-21.0571	-21.6675	-22.583	-14.9536	-25.9399	-17.0898	-23.8037	-23.1934	-16.7847	-23.4985	-11.5967	-27.1606	-24.4141
-18.0054	-19.5312	-21.0571	-40.2832	-23.8037	-23.8037	-23.4985	-14.6484	-25.6348	-18.0054	-21.6675	-19.5312	-19.8364	-21.6675	-14.0381	-24.4141	-25.6348
-17.0898	-18.9209	-20.752	-38.7573	-23.1934	-26.5503	-24.7192	-18.3105	-26.8555	-18.3105	-24.1089	-22.8882	-19.2261	-18.6157	-13.7329	-25.6348	-25.0244
-18.6157	-18.6157	-18.6157	-35.7056	-24.1089	-25.0244	-28.6865	-18.6157	-23.8037	-15.2588	-26.5503	-24.7192	-16.4795	-19.5312	-12.8174	-26.8555	-23.8037
-14.9536	-18.6157	-18.6157	-37.8418	-23.4985	-25.6348	-25.9399	-14.0381	-24.4141	-16.7847	-24.7192	-23.1934	-17.7002	-17.0898	-14.0381	-25.0244	-24.7192
-14.3433	-18.6157	-20.752	-36.9263	-21.6675	-26.5503	-24.1089	-17.395	-25.6348	-18.0054	-23.4985	-23.1934	-18.9209	-15.8691	-12.8174	-24.4141	-25.0244
-16.7847	-17.7002	-18.3105	-34.4849	-20.4468	-22.8882	-25.9399	-20.1416	-24.4141	-17.7002	-25.3296	-26.2451	-16.4795	-14.9536	-13.7329	-24.4141	-18.6157
-16.7847	-18.6157	-18.3105	-33.2642	-24.1089	-20.752	-24.1089	-18.6157	-24.7192	-18.6157	-24.1089	-25.9399	-18.6157	-15.564	-14.6484	-26.2451	-21.0571
-15.8691	-19.8364	-18.9209	-31.7383	-28.0762	-21.9727	-22.2778	-23.8037	-28.0762	-19.5312	-23.1934	-23.8037	-20.752	-13.4277	-14.6484	-28.6865	-23.8037
-19.2261	-20.752	-16.7847	-28.9917	-25.6348	-19.8364	-25.9399	-25.6348	-25.3296	-17.7002	-23.1934	-24.1089	-19.8364	-14.0381	-12.8174	-32.3486	-22.2778
-18.9209	-22.8882	-16.7847	-27.1606	-26.2451	-18.6157	-25.3296	-21.0571	-25.3296	-20.1416	-21.6675	-21.6675	-21.9727	-14.0381	-13.4277	-27.771	-23.1934
-18.0054	-24.7192	-18.0054	-27.4658	-25.6348	-21.0571	-25.6348	-20.1416	-27.771	-20.4468	-20.752	-21.3623	-23.8037	-11.5967	-15.8691	-27.771	-23.8037
-21.9727	-23.1934	-20.1416	-23.4985	-25.0244	-18.0054	-28.3814	-21.6675	-24.7192	-17.7002	-21.9727	-23.1934	-22.583	-13.1226	-14.0381	-28.3814	-21.6675
-23.8037	-25.3296	-20.752	-22.8882	-23.4985	-17.395	-27.1606	-17.7002	-22.8882	-19.2261	-22.8882	-21.6675	-25.6348	-15.8691	-16.7847	-29.2969	-21.3623
-23.1934	-27.1606	-26.2451	-24.4141	-24.4141	-19.8364	-25.3296	-18.0054	-25.0244	-22.2778	-21.9727	-20.4468	-29.602	-15.2588	-18.0054	-30.2124	-24.4141
-24.4141	-26.5503	-27.1606	-23.1934	-23.4985	-16.7847	-24.7192	-21.3623	-22.583	-18.9209	-24.4141	-23.4985	-27.771	-14.0381	-16.4795	-29.9072	-21.6675
-24.4141	-26.5503	-26.5503	-21.9727	-22.583	-13.4277	-25.9399	-19.2261	-21.3623	-20.4468	-26.8555	-25.3296	-28.0762	-15.8691	-17.0898	-29.9072	-20.1416
-20.4468	-25.0244	-25.3296	-24.4141	-21.3623	-16.4795	-26.2451	-18.3105	-23.1934	-22.583	-25.9399	-22.8882	-31.1279	-15.8691	-16.4795	-27.1606	-22.583
-20.752	-25.0244	-23.8037	-23.4985	-20.752	-16.4795	-27.771	-21.6675	-21.0571	-20.1416	-25.6348	-23.8037	-28.0762	-16.1743	-16.4795	-27.1606	-21.0571
-25.6348	-24.7192	-22.8882	-23.4985	-21.3623	-10.9863	-27.1606	-20.752	-18.3105	-19.2261	-25.0244	-26.5503	-26.2451	-20.752	-16.1743	-25.0244	-20.4468
-22.583	-25.3296	-25.0244	-25.3296	-19.8364	-13.4277	-25.0244	-18.3105	-20.4468	-19.5312	-23.1934	-24.4141	-31.4331	-22.583	-18.0054	-24.4141	-21.6675
-23.1934	-25.9399	-25.9399	-24.4141	-19.8364	-15.564	-26.2451	-21.9727	-20.1416	-18.3105	-25.0244	-25.3296	-33.2642	-20.752	-18.0054	-27.1606	-19.5312
-26.2451	-26.5503	-25.6348	-25.3296	-20.1416	-11.9019	-28.0762	-20.1416	-17.395	-17.0898	-25.3296	-26.8555	-32.3486	-21.0571	-18.9209	-25.6348	-15.564
-25.3296	-27.4658	-24.7192	-28.0762	-18.6157	-12.5122	-22.583	-17.7002	-18.3105	-19.2261	-25.3296	-24.1089	-33.2642	-19.8364	-19.5312	-24.4141	-16.1743
-25.9399	-26.2451	-25.9399	-24.4141	-20.4468	-16.4795	-21.6675	-19.2261	-19.5312	-17.395	-22.8882	-21.9727	-32.3486	-16.7847	-18.0054	-25.0244	-15.2588
-27.771	-27.1606	-23.4985	-21.9727	-18.9209	-14.6484	-23.4985	-21.0571	-19.2261	-15.2588	-25.9399	-21.0571	-27.771	-18.0054	-17.0898	-24.7192	-14.0381
-24.4141	-27.771	-25.9399	-24.4141	-18.9209	-14.6484	-22.583	-17.0898	-20.4468	-20.1416	-24.7192	-20.752	-28.0762	-21.0571	-18.3105	-20.752	-17.7002
-22.2778	-27.4658	-26.8555	-24.4141	-17.7002	-18.0054	-21.9727	-18.6157	-22.8882	-21.0571	-21.6675	-20.4468	-28.6865	-17.0898	-18.3105	-18.9209	-18.3105
-25.9399	-28.3814	-22.8882	-23.1934	-18.6157	-14.9536	-25.0244	-20.752	-21.3623	-19.8364	-22.2778	-21.6675	-25.6348	-18.3105	-17.395	-17.7002	-14.0381
-25.0244	-33.2642	-22.583	-24.7192	-18.9209	-12.8174	-23.1934	-20.4468	-25.3296	-19.8364	-19.8364	-19.5312	-27.1606	-18.6157	-17.7002	-14.3433	-14.9536
-25.9399	-31.1279	-23.4985	-25.9399	-20.4468	-15.8691	-19.5312	-19.2261	-29.2969	-18.9209	-21.6675	-20.4468	-25.0244	-16.1743	-16.7847	-13.7329	-16.1743
-28.9917	-26.8555	-24.7192	-25.3296	-21.3623	-13.7329	-24.1089	-22.2778	-25.3296	-14.6484	-20.752	-21.6675	-23.8037	-16.7847	-13.7329	-13.4277	-12.207
-25.6348	-29.2969	-24.7192	-26.5503	-22.2778	-13.4277	-23.4985	-21.9727	-25.6348	-15.2588	-20.1416	-19.5312	-25.9399	-19.5312	-14.0381	-10.6812	-12.8174
-21.0571	-29.9072	-25.9399	-26.2451	-21.9727	-16.1743	-21.3623	-19.8364	-28.6865	-14.9536	-19.5312	-20.1416	-26.2451	-19.5312	-13.4277	-10.6812	-13.1226
-22.2778	-30.2124	-26.2451	-25.9399	-18.9209	-12.207	-22.8882	-22.583	-29.2969	-13.7329	-19.8364	-23.8037	-23.1934	-20.1416	-11.2915	-11.9019	-10.6812
-21.3623	-29.602	-26.8555	-26.8555	-22.2778	-10.376	-21.0571	-19.2261	-26.5503	-13.4277	-18.6157	-26.8555	-25.0244	-21.0571	-12.5122	-11.2915	-10.6812
-19.8364	-29.9072	-29.2969	-25.9399	-20.752	-13.1226	-17.7002	-16.4795	-28.6865	-12.5122	-16.7847	-25.3296	-25.6348	-19.2261	-12.8174	-10.6812	-13.1226
-22.8882	-26.8555	-27.771	-21.6675	-21.9727	-10.6812	-19.8364	-20.1416	-27.1606	-9.76563	-18.9209	-30.5176	-22.2778	-19.8364	-10.9863	-12.8174	-12.207
-23.1934	-26.2451	-23.4985	-20.4468	-21.3623	-4.88281	-22.2778	-17.7002	-24.7192	-11.2915	-20.1416	-31.7383	-23.1934	-20.752	-11.9019	-13.1226	-9.76563
-20.1416	-26.8555	-24.4141	-20.4468	-21.3623	-7.32422	-19.2261	-17.395	-24.1089	-13.1226	-21.3623	-28.9917	-27.1606	-19.5312	-10.9863	-13.4277	-10.9863
-22.8882	-18.9209	-26.2451	-19.5312	-21.9727	-5.79834	-21.9727	-22.583	-21.3623	-10.0708	-21.0571	-31.4331	-26.5503	-16.7847	-10.0708	-14.3433	-11.2915
-25.3296	-21.0571	-23.1934	-15.8691	-20.1416	-3.05176	-23.4985	-22.583	-19.5312	-10.376	-21.9727	-28.9917	-25.0244	-18.9209	-12.8174	-14.9536	-10.376
-23.1934	-22.8882	-22.8882	-16.7847	-23.8037	-3.66211	-21.3623	-22.583	-23.4985	-14.6484	-20.752	-25.3296	-26.2451	-19.5312	-12.8174	-14.9536	-11.9019
-25.6348	-22.8882	-19.8364	-18.0054	-21.3623	-3.05176	-21.6675	-24.7192	-24.7192	-13.1226	-22.583	-24.4141	-26.2451	-17.7002	-12.207	-17.395	-10.9863
-28.3814	-23.1934	-18.3105	-15.8691	-22.8882	-2.13623	-21.9727	-26.5503	-22.2778	-12.207	-24.4141	-25.9399	-26.8555	-18.9209	-12.8174	-18.3105	-8.54492
-25.6348	-21.9727	-18.6157	-18.0054	-22.2778	-4.27246	-21.6675	-25.6348	-24.1089	-13.1226	-21.9727	-21.6675	-28.3814	-18.0054	-12.207	-17.395	-9.46045
-22.583	-22.8882	-16.1743	-17.0898	-20.4468	-3.96729	-22.8882	-27.771	-26.2451	-10.9863	-23.4985	-22.583	-28.9917	-15.564	-11.5967	-19.8364	-8.8501
-25.6348	-21.6675	-16.1743	-15.564	-20.1416	-0.30518	-24.1089	-26.8555	-22.2778	-7.62939	-23.4985	-23.8037	-26.5503	-16.7847	-9.76563	-20.1416	-6.71387
-25.0244	-24.7192	-15.2588	-17.395	-20.1416	-3.05176	-20.4468	-22.583	-21.9727	-11.2915	-21.9727	-23.4985	-27.1606	-18.0054	-12.207	-18.9209	-8.23975
-24.1089	-21.0571	-18.9209	-18.0054	-21.6675	-4.27246	-18.9209	-25.0244	-23.1934	-9.76563	-20.752	-25.6348	-24.4141	-16.1743	-10.9863	-20.4468	-11.2915
-24.7192	-20.752	-18.0054	-17.395	-21.3623	-3.35693	-21.6675	-23.8037	-20.752	-6.40869	-23.1934	-27.1606	-21.9727	-18.3105	-11.5967	-20.752	-7.62939
-25.0244	-23.4985	-17.7002	-18.9209	-22.583	-4.27246	-20.1416	-20.4468	-18.6157	-7.62939	-24.1089	-24.4141	-21.6675	-18.3105	-12.5122	-19.2261	-7.62939
-21.0571	-22.8882	-18.0054	-21.3623	-23.8037	-6.40869	-18.9209	-23.8037	-19.8364	-9.15527	-22.583	-23.8037	-23.1934	-13.4277	-11.2915	-19.8364	-11.2915
-22.8882	-21.6675	-17.395	-19.2261	-22.8882	-7.32422	-20.1416	-25.3296	-17.0898	-7.62939	-22.583	-26.5503	-22.8882	-13.4277	-10.6812	-20.4468	-11.9019
-22.8882	-23.4985	-16.4795	-18.3105	-23.4985	-7.32422	-18.9209	-19.8364	-14.6484	-9.15527	-22.583	-24.7192	-23.8037	-14.0381	-10.9863	-16.4795	-12.207
-19.8364	-23.8037	-18.9209	-19.2261	-23.8037	-12.207	-16.7847	-17.7002	-16.4795	-11.9019	-23.8037	-25.0244	-25.3296	-12.207	-10.376	-17.395	-13.4277
-21.3623	-21.0571	-18.9209	-20.4468	-23.1934	-9.76563	-19.8364	-18.9209	-16.1743	-10.0708	-25.6348	-26.2451	-22.583	-10.9863	-10.376	-21.3623	-9.46045
-21.9727	-22.2778	-15.8691	-22.2778	-22.8882	-9.46045	-18.6157	-15.564	-16.7847	-12.8174	-23.8037	-25.6348	-22.8882	-13.4277	-10.0708	-21.3623	-7.32422
-22.583	-22.8882	-19.5312	-21.3623	-24.4141	-13.1226	-18.6157	-16.1743	-20.4468	-15.8691	-23.1934	-25.3296	-25.0244	-13.7329	-10.6812	-16.1743	-9.76563
-21.3623	-18.9209	-21.3623	-19.8364	-23.1934	-10.9863	-21.6675	-17.7002	-18.6157	-14.0381	-24.4141	-27.771	-22.8882	-13.7329	-10.6812	-18.0054	-6.71387
-20.752	-15.8691	-20.4468	-18.9209	-21.6675	-12.207	-20.752	-15.2588	-17.7002	-13.1226	-23.4985	-27.1606	-18.9209	-18.0054	-10.6812	-17.0898	-4.88281
-17.7002	-17.7002	-22.583	-18.3105	-22.2778	-15.564	-18.6157	-13.1226	-20.752	-16.4795	-21.3623	-25.0244	-21.9727	-15.2588	-10.376	-17.395	-7.01904
-19.5312	-16.1743	-21.9727	-19.2261	-23.1934	-16.4795	-20.752	-15.2588	-22.583	-13.4277	-20.752	-26.5503	-22.2778	-11.9019	-10.376	-16.7847	-6.71387
-21.3623	-14.9536	-17.7002	-21.9727	-24.1089	-15.8691	-23.1934	-15.8691	-20.4468	-14.0381	-20.4468	-27.4658	-19.2261	-15.564	-9.46045	-16.1743	-6.40869
-19.8364	-16.7847	-19.8364	-24.1089	-25.0244	-17.7002	-20.752	-13.1226	-19.2261	-20.4468	-18.9209	-25.0244	-23.4985	-15.8691	-10.9863	-15.8691	-7.62939
-21.6675	-14.9536	-22.2778	-25.6348	-24.1089	-19.8364	-19.5312	-16.4795	-19.2261	-19.5312	-19.5312	-25.0244	-25.3296	-14.0381	-10.376	-12.5122	-7.32422
-23.1934	-15.564	-19.2261	-27.1606	-21.9727	-14.9536	-22.2778	-14.3433	-13.7329	-15.8691	-17.0898	-26.8555	-23.8037	-18.3105	-11.2915	-13.7329	-5.18799
-21.9727	-14.6484	-19.5312	-26.2451	-23.1934	-18.9209	-18.0054	-14.0381	-15.2588	-17.7002	-17.0898	-26.2451	-24.1089	-20.4468	-13.4277	-13.7329	-8.23975
-18.9209	-11.5967	-20.4468	-26.8555	-19.2261	-16.7847	-18.0054	-14.6484	-17.0898	-16.1743	-18.6157	-27.1606	-25.0244	-16.1743	-13.1226	-14.0381	-10.0708
-19.8364	-11.5967	-19.8364	-24.7192	-19.5312	-14.3433	-22.583	-16.1743	-15.564	-14.6484	-21.0571	-29.2969	-23.4985	-19.2261	-11.9019	-16.1743	-7.93457
-19.2261	-14.3433	-20.1416	-22.8882	-21.6675	-16.4795	-21.6675	-17.395	-15.564	-15.8691	-19.5312	-28.0762	-25.9399	-19.8364	-10.9863	-12.5122	-10.0708
-17.0898	-15.564	-20.1416	-21.6675	-20.1416	-16.4795	-20.4468	-21.0571	-16.7847	-14.3433	-19.5312	-26.8555	-25.6348	-19.2261	-10.376	-13.4277	-11.9019
-17.7002	-14.0381	-19.2261	-20.1416	-20.4468	-14.0381	-21.3623	-19.8364	-16.7847	-9.46045	-20.4468	-26.8555	-22.2778	-21.3623	-10.0708	-15.564	-10.0708
-18.3105	-17.395	-19.2261	-21.3623	-20.752	-15.2588	-21.0571	-17.0898	-16.1743	-14.3433	-20.1416	-24.1089	-22.583	-22.583	-10.0708	-13.1226	-10.0708
-16.7847	-16.7847	-21.0571	-20.752	-20.4468	-19.2261	-19.2261	-18.9209	-17.7002	-16.1743	-16.1743	-24.4141	-22.8882	-19.5312	-10.0708	-14.0381	-13.7329
-18.3105	-14.3433	-19.2261	-18.6157	-18.3105	-16.7847	-21.3623	-18.6157	-14.3433	-15.564	-17.7002	-26.2451	-19.8364	-20.752	-9.46045	-15.2588	-12.5122
-19.5312	-16.1743	-18.9209	-17.395	-20.752	-16.7847	-19.8364	-17.0898	-15.8691	-17.0898	-16.4795	-22.8882	-17.395	-21.0571	-10.6812	-14.6484	-13.1226
-20.1416	-17.395	-18.6157	-18.9209	-19.5312	-19.2261	-18.3105	-15.2588	-16.1743	-14.9536	-14.6484	-21.3623	-20.4468	-16.1743	-12.207	-14.3433	-15.8691
-19.5312	-14.6484	-16.7847	-20.1416	-18.6157	-18.6157	-19.5312	-18.6157	-15.8691	-10.0708	-16.1743	-21.9727	-21.9727	-14.3433	-11.2915	-16.4795	-15.2588
-19.2261	-16.1743	-14.6484	-19.5312	-17.7002	-18.0054	-20.4468	-15.564	-17.7002	-14.3433	-15.8691	-22.2778	-21.9727	-14.9536	-11.9019	-15.8691	-15.2588
-17.7002	-19.5312	-14.0381	-18.6157	-18.0054	-20.1416	-17.7002	-15.564	-18.3105	-18.0054	-14.0381	-21.3623	-23.8037	-14.0381	-15.564	-15.2588	-14.9536
-21.0571	-18.0054	-13.4277	-18.0054	-18.3105	-19.5312	-18.9209	-17.0898	-18.0054	-16.1743	-11.9019	-20.4468	-21.0571	-14.6484	-14.9536	-14.6484	-14.6484
-22.2778	-20.1416	-14.0381	-18.3105	-17.0898	-15.564	-20.1416	-13.4277	-17.7002	-16.7847	-12.8174	-21.6675	-20.4468	-17.0898	-13.7329	-13.7329	-13.1226
-21.6675	-19.8364	-15.2588	-20.4468	-18.6157	-16.1743	-16.4795	-12.207	-16.7847	-21.3623	-10.6812	-19.8364	-21.6675	-18.6157	-14.0381	-14.0381	-16.1743
-20.1416	-14.3433	-15.564	-21.3623	-19.2261	-17.0898	-16.7847	-16.1743	-17.0898	-21.3623	-13.1226	-22.2778	-18.6157	-16.7847	-9.46045	-15.8691	-16.4795
-18.6157	-14.9536	-11.5967	-19.8364	-19.8364	-16.7847	-17.0898	-14.3433	-18.0054	-21.3623	-16.4795	-22.8882	-18.3105	-19.5312	-11.5967	-18.6157	-14.0381
-20.752	-18.6157	-14.0381	-19.8364	-22.583	-18.0054	-12.5122	-12.5122	-19.2261	-24.1089	-14.6484	-21.6675	-23.1934	-17.395	-14.3433	-15.2588	-15.564
-22.2778	-17.0898	-14.3433	-21.9727	-21.3623	-16.7847	-12.8174	-15.564	-15.564	-22.2778	-15.564	-21.6675	-21.9727	-11.2915	-15.2588	-14.9536	-15.564
-23.4985	-14.9536	-11.2915	-20.752	-17.395	-15.2588	-16.1743	-18.0054	-12.5122	-22.8882	-15.8691	-20.4468	-19.5312	-16.1743	-14.3433	-15.2588	-14.0381
-22.2778	-19.2261	-11.5967	-19.5312	-15.8691	-18.6157	-12.207	-16.1743	-13.4277	-25.0244	-14.9536	-20.1416	-20.1416	-14.9536	-14.0381	-14.6484	-14.3433
-22.2778	-15.2588	-13.4277	-18.6157	-14.6484	-20.752	-10.9863	-18.0054	-13.1226	-21.9727	-14.6484	-22.2778	-18.9209	-10.9863	-12.207	-14.6484	-14.3433
-25.0244	-13.7329	-12.207	-21.6675	-14.3433	-17.395	-12.8174	-16.4795	-12.207	-21.9727	-19.2261	-22.8882	-17.7002	-13.7329	-14.3433	-13.1226	-12.8174
-23.8037	-16.4795	-11.2915	-25.6348	-16.7847	-18.6157	-13.7329	-10.6812	-12.8174	-23.8037	-18.3105	-18.3105	-17.395	-14.9536	-15.2588	-11.2915	-16.4795
-21.6675	-15.8691	-12.207	-28.9917	-15.2588	-19.5312	-13.7329	-12.5122	-14.9536	-20.1416	-16.4795	-18.6157	-18.6157	-14.0381	-14.3433	-10.0708	-15.564
-23.8037	-14.3433	-11.2915	-30.8227	-15.8691	-16.7847	-16.1743	-15.8691	-17.395	-18.3105	-17.0898	-21.6675	-16.7847	-16.7847	-13.1226	-9.46045	-12.5122
-22.8882	-15.8691	-14.0381	-29.2969	-15.564	-17.395	-14.3433	-14.9536	-18.3105	-18.6157	-15.8691	-19.5312	-18.0054	-16.1743	-11.2915	-9.46045	-13.4277
-18.9209	-17.0898	-17.7002	-28.3814	-13.1226	-18.0054	-14.0381	-16.7847	-20.752	-18.9209	-15.564	-17.7002	-20.1416	-11.2915	-11.2915	-8.54492	-15.2588
-19.2261	-13.4277	-16.1743	-29.602	-13.1226	-18.0054	-18.0054	-20.4468	-22.2778	-15.2588	-18.9209	-18.0054	-19.2261	-13.7329	-13.1226	-10.376	-12.8174
-18.9209	-16.1743	-14.6484	-30.8227	-14.0381	-16.4795	-16.4795	-15.8691	-23.4985	-18.6157	-18.9209	-16.4795	-19.5312	-13.7329	-16.4795	-8.8501	-7.93457
-17.0898	-18.0054	-16.7847	-29.9072	-15.564	-16.4795	-15.564	-14.6484	-25.0244	-18.3105	-17.0898	-17.0898	-20.752	-13.1226	-14.3433	-10.0708	-10.9863
-18.6157	-17.7002	-17.0898	-31.1279	-13.7329	-14.9536	-18.9209	-16.4795	-25.6348	-12.5122	-19.2261	-20.4468	-18.3105	-14.3433	-13.4277	-13.1226	-12.207
-19.2261	-20.752	-16.1743	-31.4331	-13.1226	-16.1743	-22.2778	-14.3433	-25.6348	-13.7329	-19.5312	-18.6157	-14.6484	-19.2261	-14.6484	-11.2915	-11.5967
-19.8364	-24.1089	-18.9209	-29.602	-12.5122	-18.3105	-21.3623	-17.7002	-23.4985	-14.6484	-15.8691	-16.1743	-15.2588	-18.3105	-13.1226	-12.207	-13.7329
-20.1416	-21.3623	-21.3623	-31.1279	-11.9019	-16.4795	-22.2778	-21.3623	-23.1934	-11.5967	-18.3105	-16.4795	-15.2588	-17.395	-14.6484	-12.5122	-16.4795
-21.9727	-21.0571	-18.6157	-33.5693	-11.9019	-16.4795	-22.2778	-20.1416	-21.0571	-13.7329	-19.2261	-15.564	-14.3433	-20.1416	-16.7847	-8.8501	-14.3433
-23.8037	-22.2778	-20.752	-33.8745	-10.0708	-16.1743	-19.5312	-19.5312	-22.583	-18.3105	-16.7847	-13.7329	-18.3105	-17.7002	-16.1743	-11.2915	-15.564
-23.8037	-18.9209	-21.0571	-32.6538	-10.0708	-14.9536	-18.3105	-21.6675	-22.2778	-18.0054	-18.0054	-14.3433	-18.6157	-17.395	-14.0381	-13.1226	-17.395
-26.2451	-20.1416	-18.0054	-32.3486	-8.23975	-14.0381	-17.0898	-20.1416	-20.1416	-15.564	-17.395	-17.395	-17.395	-19.5312	-13.7329	-11.9019	-13.4277
-23.8037	-21.9727	-20.4468	-32.0435	-10.376	-13.4277	-14.9536	-20.752	-18.9209	-17.395	-16.4795	-17.395	-18.9209	-18.6157	-14.0381	-10.0708	-16.1743
-26.8555	-18.9209	-21.3623	-32.0435	-10.0708	-13.1226	-14.9536	-21.9727	-18.9209	-16.7847	-17.0898	-16.7847	-20.1416	-18.6157	-13.1226	-10.9863	-17.7002
-27.1606	-20.4468	-19.2261	-29.9072	-8.23975	-11.5967	-15.8691	-18.6157	-19.8364	-17.0898	-18.9209	-14.6484	-18.3105	-21.3623	-13.7329	-13.1226	-16.4795
-26.2451	-23.8037	-20.4468	-29.602	-12.207	-11.2915	-13.4277	-19.8364	-20.4468	-18.3105	-18.0054	-14.3433	-20.1416	-20.752	-16.1743	-10.376	-16.7847
-26.8555	-21.3623	-22.8882	-28.9917	-12.207	-8.54492	-14.9536	-23.1934	-23.1934	-16.4795	-18.3105	-15.564	-20.4468	-14.0381	-18.9209	-10.376	-16.7847
-26.5503	-17.0898	-21.0571	-31.7383	-10.9863	-9.15527	-15.564	-21.3623	-19.5312	-16.7847	-20.1416	-16.1743	-19.2261	-16.7847	-19.2261	-10.0708	-14.3433
-22.2778	-21.6675	-21.0571	-31.4331	-12.8174	-10.0708	-14.9536	-19.5312	-18.0054	-17.395	-18.6157	-15.2588	-21.6675	-16.4795	-19.8364	-7.32422	-11.9019
-21.9727	-19.8364	-21.9727	-29.602	-16.4795	-12.8174	-14.0381	-19.8364	-14.9536	-19.5312	-19.8364	-14.9536	-22.8882	-16.1743	-19.8364	-7.32422	-14.9536
-23.4985	-17.395	-18.9209	-29.2969	-15.8691	-14.6484	-18.0054	-23.4985	-14.6484	-17.395	-22.583	-15.2588	-21.0571	-17.0898	-17.395	-7.62939	-14.0381
-21.6675	-19.2261	-17.7002	-27.771	-17.0898	-13.7329	-16.7847	-21.3623	-15.2588	-16.1743	-20.4468	-15.8691	-21.3623	-18.0054	-17.395	-6.71387	-12.5122
-20.1416	-17.395	-20.752	-27.771	-20.752	-15.8691	-16.7847	-24.1089	-15.2588	-19.5312	-19.2261	-15.564	-24.4141	-16.4795	-16.7847	-7.01904	-13.1226
-19.2261	-14.3433	-18.9209	-27.771	-19.2261	-14.3433	-19.8364	-24.7192	-15.2588	-18.9209	-20.4468	-17.7002	-22.8882	-15.8691	-16.7847	-9.15527	-12.207
-16.4795	-14.3433	-16.1743	-27.1606	-18.0054	-16.4795	-17.7002	-22.2778	-12.8174	-21.3623	-20.4468	-16.7847	-20.4468	-17.0898	-17.7002	-10.376	-12.207
-14.0381	-14.3433	-16.1743	-28.3814	-15.564	-17.395	-15.8691	-22.8882	-11.2915	-23.1934	-18.6157	-16.7847	-19.2261	-14.9536	-17.0898	-12.8174	-12.5122
-15.2588	-15.2588	-13.4277	-29.2969	-14.0381	-16.1743	-18.3105	-22.8882	-10.9863	-18.6157	-21.3623	-19.8364	-18.0054	-17.395	-18.3105	-13.4277	-14.0381
-20.1416	-16.4795	-10.6812	-29.9072	-17.395	-15.2588	-17.0898	-22.8882	-11.9019	-17.395	-21.6675	-17.395	-18.0054	-18.6157	-18.3105	-10.9863	-11.2915
-21.0571	-19.2261	-13.4277	-29.602	-20.4468	-15.564	-14.9536	-23.4985	-9.76563	-17.7002	-22.583	-16.7847	-21.6675	-12.207	-19.2261	-10.0708	-15.8691
-22.583	-17.7002	-14.0381	-32.0435	-21.3623	-16.7847	-15.8691	-26.2451	-9.76563	-14.0381	-26.5503	-17.395	-20.1416	-10.376	-18.0054	-13.4277	-15.8691
-22.2778	-21.0571	-10.9863	-32.959	-20.752	-15.564	-14.0381	-21.9727	-9.76563	-14.3433	-27.1606	-16.4795	-18.9209	-12.207	-16.4795	-12.207	-13.1226
-19.5312	-25.0244	-11.5967	-31.1279	-25.6348	-16.4795	-12.207	-19.5312	-10.6812	-15.564	-24.7192	-15.564	-18.3105	-7.93457	-15.2588	-9.76563	-15.564
-19.8364	-20.4468	-10.9863	-31.1279	-20.752	-14.3433	-12.207	-22.583	-14.3433	-13.7329	-25.6348	-17.0898	-20.4468	-7.01904	-16.1743	-15.2588	-18.3105
-19.5312	-20.4468	-8.8501	-34.1797	-23.8037	-13.7329	-13.7329	-21.3623	-15.8691	-12.5122	-27.771	-18.0054	-18.9209	-11.9019	-16.1743	-16.1743	-14.9536
-18.6157	-21.6675	-8.8501	-36.3159	-24.7192	-13.1226	-14.9536	-19.8364	-17.7002	-14.3433	-26.8555	-16.1743	-21.0571	-8.54492	-14.9536	-13.4277	-14.9536
-17.395	-18.6157	-10.9863	-36.6211	-23.1934	-12.5122	-17.395	-22.2778	-16.7847	-10.6812	-28.0762	-17.7002	-20.1416	-9.46045	-14.9536	-15.2588	-17.7002
-17.0898	-16.1743	-7.62939	-34.1797	-20.1416	-12.5122	-17.0898	-22.2778	-19.8364	-10.0708	-28.0762	-18.3105	-18.6157	-12.5122	-17.7002	-14.3433	-14.9536
-16.4795	-21.3623	-10.9863	-30.8227	-20.1416	-13.7329	-16.7847	-21.9727	-19.5312	-12.8174	-24.7192	-16.7847	-17.0898	-13.4277	-15.8691	-11.2915	-14.0381
-17.395	-19.5312	-15.8691	-29.9072	-20.4468	-15.8691	-16.7847	-24.1089	-18.3105	-11.5967	-24.4141	-18.0054	-16.4795	-11.9019	-16.7847	-11.9019	-15.8691
-15.8691	-19.5312	-10.9863	-28.9917	-18.3105	-15.2588	-18.0054	-22.2778	-20.752	-9.76563	-25.6348	-16.4795	-15.564	-13.7329	-16.4795	-13.1226	-13.7329
-14.9536	-23.1934	-9.76563	-26.8555	-18.0054	-14.6484	-16.4795	-21.3623	-22.2778	-12.5122	-25.0244	-15.2588	-15.564	-13.4277	-14.9536	-13.1226	-13.7329
-13.7329	-18.9209	-12.8174	-27.1606	-16.4795	-15.564	-17.0898	-21.9727	-24.1089	-10.9863	-25.0244	-15.8691	-16.4795	-9.15527	-13.7329	-12.5122	-15.2588
-13.7329	-16.7847	-13.4277	-28.9917	-16.4795	-15.2588	-21.0571	-19.8364	-27.4658	-8.23975	-26.8555	-15.2588	-17.395	-12.8174	-13.4277	-14.9536	-12.5122
-13.1226	-17.7002	-14.3433	-27.771	-18.3105	-14.9536	-20.1416	-18.3105	-28.6865	-8.8501	-25.3296	-13.4277	-19.5312	-13.7329	-15.2588	-14.9536	-10.376
-13.7329	-15.8691	-17.395	-24.4141	-17.395	-18.6157	-19.2261	-18.6157	-26.2451	-10.376	-23.4985	-13.1226	-19.8364	-12.207	-16.1743	-15.564	-13.7329
-15.2588	-13.7329	-17.7002	-27.1606	-17.7002	-17.7002	-17.395	-21.6675	-29.602	-9.46045	-25.6348	-15.2588	-19.2261	-13.4277	-14.6484	-16.7847	-15.2588
-13.1226	-16.7847	-18.3105	-26.5503	-19.2261	-18.6157	-15.564	-18.0054	-26.2451	-12.5122	-23.4985	-14.0381	-21.0571	-14.3433	-13.4277	-14.0381	-12.207
-12.5122	-15.2588	-22.2778	-27.771	-20.4468	-19.2261	-16.4795	-19.5312	-24.4141	-10.6812	-25.6348	-14.6484	-23.1934	-10.9863	-10.6812	-10.9863	-15.2588
-12.5122	-14.6484	-22.8882	-28.9917	-18.3105	-16.4795	-19.2261	-19.5312	-28.6865	-6.71387	-27.4658	-17.395	-21.3623	-10.6812	-12.8174	-12.8174	-14.3433
-10.9863	-16.1743	-22.2778	-28.6865	-19.8364	-16.7847	-18.6157	-17.7002	-29.2969	-9.46045	-25.0244	-18.6157	-19.2261	-10.9863	-14.9536	-14.6484	-14.6484
-10.6812	-14.9536	-23.1934	-27.4658	-21.6675	-18.0054	-15.2588	-19.2261	-25.6348	-10.6812	-20.4468	-18.0054	-21.9727	-5.49316	-14.6484	-10.9863	-16.1743
-11.5967	-7.93457	-21.9727	-27.1606	-20.4468	-17.0898	-19.8364	-19.2261	-27.1606	-8.54492	-21.9727	-18.9209	-23.1934	-3.96729	-14.0381	-13.1226	-18.3105
-11.5967	-9.46045	-19.5312	-29.9072	-21.0571	-17.7002	-18.6157	-17.7002	-30.2124	-10.6812	-20.752	-19.2261	-21.0571	-6.40869	-15.2588	-12.8174	-14.3433
-11.2915	-13.7329	-21.3623	-27.1606	-22.8882	-18.0054	-14.9536	-15.8691	-26.8555	-13.4277	-15.2588	-18.3105	-20.752	-3.96729	-13.7329	-10.9863	-14.3433
-10.6812	-12.207	-23.1934	-27.1606	-22.8882	-18.6157	-15.564	-18.9209	-26.2451	-8.8501	-17.0898	-19.2261	-22.2778	-3.05176	-12.8174	-10.9863	-15.8691
-10.376	-14.0381	-20.752	-28.3814	-21.3623	-18.9209	-17.395	-18.9209	-26.5503	-10.9863	-17.7002	-18.0054	-21.0571	-2.74658	-14.6484	-12.8174	-11.2915
-10.6812	-16.1743	-20.752	-28.3814	-22.8882	-19.2261	-14.3433	-17.0898	-25.6348	-14.0381	-16.7847	-16.4795	-22.583	-1.52588	-15.564	-12.207	-12.5122
-10.6812	-14.6484	-18.9209	-28.6865	-17.395	-16.7847	-15.2588	-17.0898	-23.8037	-12.207	-18.3105	-19.2261	-21.6675	-0.91553	-14.0381	-12.8174	-13.4277
-9.46045	-16.4795	-15.8691	-28.3814	-15.8691	-15.2588	-16.7847	-19.5312	-24.1089	-14.0381	-18.9209	-18.9209	-20.1416	-5.18799	-14.0381	-14.0381	-10.376
-14.0381	-19.5312	-14.9536	-30.5176	-17.7002	-15.564	-11.9019	-18.6157	-24.7192	-16.7847	-16.4795	-17.7002	-20.4468	-3.05176	-17.0898	-13.1226	-9.15527
-13.4277	-18.0054	-15.8691	-29.602	-17.7002	-16.4795	-13.4277	-21.6675	-21.3623	-15.564	-17.0898	-16.1743	-20.4468	-1.2207	-17.7002	-14.6484	-13.1226
-10.376	-15.8691	-15.2588	-29.2969	-16.4795	-15.8691	-12.5122	-25.0244	-24.4141	-14.9536	-15.8691	-15.8691	-21.9727	-6.10352	-17.0898	-13.7329	-11.5967
-12.5122	-18.0054	-13.4277	-25.0244	-16.7847	-18.3105	-12.207	-24.7192	-22.2778	-17.0898	-13.4277	-14.0381	-21.9727	-5.49316	-14.6484	-14.0381	-11.2915
-12.5122	-16.7847	-16.7847	-24.7192	-17.0898	-21.9727	-11.5967	-24.1089	-20.4468	-15.564	-14.6484	-12.5122	-22.2778	-3.66211	-12.207	-15.8691	-11.5967
-11.2915	-17.395	-16.7847	-27.771	-13.7329	-19.2261	-12.5122	-27.771	-22.8882	-12.5122	-16.1743	-15.8691	-21.9727	-6.40869	-14.6484	-15.564	-11.9019
-12.5122	-19.8364	-18.0054	-27.1606	-17.0898	-19.2261	-9.46045	-28.6865	-23.1934	-14.0381	-13.4277	-15.2588	-22.8882	-8.54492	-16.1743	-14.9536	-12.8174
-14.0381	-17.7002	-19.2261	-24.4141	-19.2261	-18.6157	-8.54492	-28.0762	-22.8882	-13.7329	-10.6812	-14.3433	-23.1934	-4.27246	-17.395	-16.4795	-15.564
-15.2588	-17.395	-17.7002	-26.8555	-18.3105	-15.8691	-13.4277	-25.3296	-21.6675	-12.8174	-11.9019	-16.4795	-20.1416	-5.79834	-16.4795	-16.1743	-15.2588
-18.0054	-18.6157	-15.2588	-26.8555	-20.752	-18.6157	-13.4277	-24.7192	-20.752	-17.0898	-12.5122	-13.1226	-21.3623	-7.62939	-16.4795	-14.0381	-10.376
-18.3105	-17.395	-14.9536	-25.0244	-21.0571	-17.0898	-12.8174	-22.8882	-18.0054	-18.6157	-11.9019	-13.7329	-21.3623	-6.40869	-14.6484	-14.0381	-12.8174
-17.7002	-14.0381	-18.0054	-28.0762	-18.0054	-16.7847	-14.3433	-25.6348	-17.395	-14.9536	-13.1226	-14.3433	-19.8364	-6.10352	-17.0898	-14.0381	-14.0381
-17.395	-17.0898	-18.6157	-28.9917	-16.7847	-16.1743	-12.207	-24.4141	-19.8364	-16.1743	-13.4277	-14.6484	-16.7847	-8.8501	-18.3105	-14.6484	-10.6812
-18.3105	-18.3105	-21.3623	-25.6348	-19.2261	-15.8691	-9.46045	-23.4985	-15.564	-17.395	-12.5122	-12.207	-14.9536	-5.79834	-17.395	-14.3433	-12.8174
-17.7002	-17.0898	-21.3623	-28.0762	-21.6675	-14.3433	-10.0708	-24.1089	-18.0054	-14.0381	-14.3433	-15.564	-16.1743	-8.8501	-14.6484	-14.6484	-13.7329
-19.5312	-19.5312	-21.0571	-26.8555	-18.9209	-15.564	-9.15527	-24.7192	-18.0054	-14.0381	-15.564	-16.1743	-15.564	-10.0708	-16.4795	-14.3433	-10.0708
-23.4985	-20.4468	-21.9727	-25.3296	-20.752	-18.3105	-7.93457	-25.9399	-14.9536	-14.3433	-14.0381	-16.1743	-15.8691	-7.62939	-17.395	-10.9863	-11.2915
-23.4985	-19.2261	-21.6675	-24.4141	-18.9209	-15.8691	-11.2915	-27.1606	-13.7329	-10.376	-18.6157	-15.2588	-16.1743	-7.32422	-14.9536	-15.564	-14.0381
-23.4985	-21.6675	-18.3105	-23.8037	-20.4468	-18.3105	-12.207	-28.3814	-18.9209	-13.4277	-17.0898	-14.3433	-17.395	-10.6812	-15.8691	-14.3433	-11.5967
-24.4141	-25.3296	-19.8364	-22.583	-24.4141	-16.4795	-8.54492	-26.5503	-16.7847	-15.564	-16.7847	-13.4277	-18.0054	-8.54492	-15.2588	-12.5122	-10.0708
-22.8882	-21.0571	-19.8364	-21.6675	-25.6348	-15.2588	-12.5122	-29.9072	-15.2588	-12.207	-20.1416	-15.564	-20.752	-9.46045	-16.4795	-14.6484	-14.9536
-22.2778	-20.1416	-16.1743	-25.6348	-21.9727	-13.4277	-14.3433	-29.9072	-17.395	-13.1226	-22.8882	-16.4795	-19.5312	-15.564	-18.0054	-14.3433	-12.5122
-23.1934	-22.2778	-15.2588	-21.9727	-21.9727	-13.7329	-12.207	-27.771	-15.564	-15.2588	-20.1416	-13.4277	-20.1416	-14.3433	-19.2261	-10.9863	-10.376
-23.4985	-19.5312	-17.7002	-21.3623	-19.8364	-13.7329	-12.5122	-30.5176	-12.5122	-13.1226	-18.9209	-14.0381	-19.5312	-13.4277	-18.3105	-12.5122	-10.9863
-22.8882	-20.4468	-16.7847	-19.8364	-17.0898	-13.7329	-15.8691	-28.3814	-15.564	-16.4795	-19.2261	-14.0381	-19.5312	-15.564	-18.9209	-12.8174	-12.8174
-24.1089	-22.583	-15.564	-16.1743	-18.6157	-15.8691	-15.564	-28.6865	-18.0054	-17.7002	-17.7002	-12.5122	-20.1416	-14.3433	-22.8882	-10.9863	-9.46045
-23.8037	-24.1089	-14.9536	-16.1743	-18.0054	-14.6484	-14.0381	-28.0762	-16.7847	-14.6484	-17.7002	-12.5122	-20.752	-13.7329	-19.2261	-11.5967	-10.376
-21.0571	-23.4985	-14.0381	-19.8364	-16.1743	-15.564	-18.6157	-28.3814	-17.7002	-14.6484	-18.3105	-14.6484	-20.4468	-15.8691	-18.0054	-12.8174	-9.76563
-24.7192	-24.4141	-12.8174	-20.1416	-17.0898	-15.564	-15.564	-26.5503	-18.3105	-15.564	-14.6484	-14.9536	-19.8364	-16.7847	-18.3105	-11.9019	-8.8501
-24.7192	-21.3623	-14.3433	-16.7847	-13.4277	-15.8691	-13.4277	-27.4658	-15.8691	-14.3433	-15.8691	-14.6484	-17.7002	-15.2588	-15.8691	-10.0708	-12.5122
-23.8037	-19.5312	-13.1226	-18.6157	-10.6812	-16.4795	-16.1743	-28.3814	-20.4468	-12.8174	-19.8364	-15.2588	-19.5312	-17.7002	-16.7847	-11.5967	-11.5967
-21.6675	-24.4141	-12.8174	-20.1416	-11.9019	-18.0054	-15.2588	-28.3814	-21.6675	-14.9536	-17.7002	-16.4795	-20.752	-18.6157	-17.0898	-10.9863	-13.4277
-21.6675	-25.0244	-14.3433	-21.9727	-13.4277	-20.1416	-14.6484	-29.2969	-18.6157	-14.6484	-15.564	-16.7847	-19.8364	-14.0381	-14.9536	-9.76563	-14.9536
-20.1416	-23.1934	-14.3433	-22.583	-12.207	-21.9727	-18.6157	-30.8227	-21.3623	-13.4277	-18.6157	-18.0054	-21.0571	-14.6484	-15.564	-13.1226	-15.564
-18.6157	-24.4141	-14.3433	-23.4985	-13.7329	-21.3623	-17.0898	-28.9917	-22.8882	-16.4795	-14.6484	-16.1743	-20.4468	-16.1743	-16.4795	-10.6812	-13.1226
-23.1934	-24.1089	-16.7847	-22.2778	-15.2588	-19.8364	-18.0054	-28.3814	-23.1934	-16.1743	-12.8174	-15.564	-20.4468	-12.5122	-16.1743	-11.5967	-14.0381
-20.752	-16.7847	-14.9536	-23.4985	-12.8174	-20.4468	-20.752	-29.9072	-23.1934	-14.9536	-16.7847	-15.8691	-19.5312	-14.0381	-13.4277	-14.9536	-16.4795
-18.3105	-14.6484	-12.207	-23.1934	-13.7329	-21.0571	-17.0898	-27.1606	-26.2451	-15.8691	-17.7002	-16.4795	-20.4468	-16.1743	-15.2588	-13.4277	-13.1226
-19.5312	-15.564	-13.1226	-20.4468	-14.9536	-22.8882	-15.8691	-26.2451	-22.583	-14.9536	-16.4795	-15.8691	-20.4468	-13.1226	-16.4795	-8.8501	-13.7329
-16.1743	-13.1226	-11.2915	-21.9727	-14.9536	-19.8364	-17.395	-29.602	-20.4468	-13.7329	-19.8364	-15.2588	-20.4468	-11.9019	-16.7847	-12.8174	-17.395
-14.6484	-16.7847	-9.15527	-23.1934	-14.3433	-17.395	-16.7847	-26.8555	-20.1416	-13.4277	-18.9209	-18.9209	-20.1416	-14.0381	-18.3105	-12.5122	-15.564
-15.8691	-17.7002	-9.76563	-22.8882	-15.2588	-18.3105	-14.3433	-25.6348	-15.564	-14.3433	-16.4795	-16.7847	-18.9209	-11.5967	-15.2588	-9.15527	-16.7847
-14.9536	-14.6484	-12.207	-25.0244	-12.207	-16.7847	-16.1743	-26.2451	-13.1226	-11.2915	-18.0054	-18.0054	-18.9209	-10.0708	-11.9019	-12.5122	-20.752
-13.1226	-13.7329	-11.9019	-28.3814	-12.207	-17.0898	-16.7847	-26.5503	-13.1226	-11.2915	-18.0054	-16.7847	-22.583	-14.0381	-12.5122	-12.207	-19.5312
-14.0381	-15.2588	-10.376	-25.6348	-15.8691	-16.7847	-12.8174	-26.2451	-11.9019	-11.5967	-16.7847	-17.395	-23.1934	-10.376	-13.1226	-7.93457	-14.9536
-13.7329	-12.207	-12.5122	-21.3623	-14.6484	-16.7847	-16.4795	-27.4658	-9.46045	-10.376	-20.752	-19.8364	-21.3623	-7.32422	-13.1226	-10.6812	-16.7847
-11.2915	-11.2915	-10.6812	-23.8037	-13.7329	-14.9536	-19.5312	-29.2969	-11.9019	-10.6812	-21.3623	-19.2261	-19.8364	-11.2915	-16.1743	-12.8174	-14.9536
-13.1226	-15.8691	-10.9863	-20.752	-14.3433	-17.0898	-21.6675	-25.6348	-8.23975	-11.2915	-18.6157	-19.2261	-18.6157	-10.9863	-15.8691	-11.9019	-12.8174
-14.6484	-16.4795	-12.5122	-18.9209	-13.7329	-15.2588	-22.2778	-25.6348	-6.71387	-8.8501	-18.6157	-19.8364	-18.3105	-9.46045	-12.207	-10.9863	-17.395
-15.2588	-15.8691	-9.76563	-19.2261	-11.5967	-10.376	-25.9399	-27.4658	-11.2915	-6.10352	-19.2261	-20.1416	-17.395	-10.376	-11.9019	-14.3433	-18.0054
-15.2588	-17.0898	-10.376	-21.3623	-13.4277	-14.0381	-24.1089	-27.771	-10.376	-8.8501	-17.395	-20.1416	-15.8691	-9.15527	-12.8174	-11.9019	-14.6484
-16.4795	-13.7329	-12.8174	-17.0898	-12.5122	-13.1226	-24.1089	-27.4658	-7.93457	-6.10352	-19.5312	-19.5312	-13.7329	-3.96729	-11.2915	-11.9019	-14.3433
-15.8691	-12.8174	-12.5122	-20.1416	-13.1226	-12.8174	-26.5503	-27.771	-8.54492	-7.32422	-20.752	-20.4468	-15.564	-6.40869	-10.9863	-15.2588	-17.395
-15.8691	-15.564	-7.93457	-19.5312	-16.4795	-13.4277	-25.3296	-28.3814	-7.62939	-9.76563	-18.6157	-19.8364	-14.9536	-7.93457	-11.9019	-12.5122	-12.207
-18.9209	-16.1743	-10.0708	-16.4795	-17.0898	-14.6484	-25.9399	-30.8227	-5.79834	-10.0708	-18.9209	-18.9209	-14.0381	-4.88281	-8.8501	-13.4277	-12.8174
-17.0898	-15.2588	-10.6812	-21.0571	-13.1226	-15.8691	-27.1606	-30.2124	-8.54492	-10.9863	-21.6675	-21.0571	-13.1226	-8.23975	-10.376	-16.1743	-14.0381
-15.564	-17.0898	-8.8501	-22.583	-11.2915	-14.6484	-26.8555	-28.0762	-10.0708	-11.2915	-18.9209	-20.752	-13.4277	-8.23975	-12.8174	-15.564	-12.207
-16.1743	-18.6157	-8.8501	-21.9727	-13.7329	-13.7329	-27.771	-27.1606	-8.23975	-10.0708	-18.3105	-20.752	-10.9863	-7.93457	-10.376	-14.0381	-11.9019
-14.3433	-17.7002	-7.62939	-21.6675	-11.2915	-12.8174	-32.959	-25.0244	-9.15527	-10.6812	-19.5312	-20.752	-10.376	-10.376	-11.2915	-15.2588	-12.5122
-14.0381	-19.5312	-7.62939	-21.9727	-14.0381	-13.7329	-33.8745	-22.583	-10.0708	-15.8691	-17.0898	-16.1743	-9.46045	-11.9019	-13.4277	-16.4795	-11.5967
-18.3105	-19.5312	-7.62939	-19.5312	-12.5122	-10.9863	-30.2124	-24.4141	-7.32422	-16.7847	-15.2588	-15.2588	-11.2915	-7.62939	-10.9863	-16.7847	-10.9863
-18.0054	-18.0054	-10.0708	-20.1416	-12.207	-11.5967	-32.0435	-25.0244	-6.71387	-16.7847	-15.2588	-16.1743	-12.8174	-7.32422	-9.76563	-19.2261	-13.1226
-14.9536	-21.0571	-7.01904	-21.3623	-11.5967	-11.9019	-31.1279	-24.4141	-10.6812	-19.2261	-14.6484	-16.4795	-13.1226	-8.54492	-11.9019	-17.395	-9.46045
-15.8691	-22.583	-7.62939	-19.8364	-16.1743	-10.0708	-30.5176	-22.8882	-6.40869	-21.3623	-12.5122	-12.8174	-13.4277	-6.71387	-9.46045	-15.8691	-9.76563
-16.7847	-20.4468	-10.376	-22.583	-18.6157	-10.376	-30.5176	-23.1934	-7.01904	-20.1416	-14.0381	-12.207	-12.5122	-8.54492	-7.32422	-17.0898	-13.4277
-14.0381	-20.752	-9.46045	-25.6348	-18.9209	-11.9019	-29.602	-24.7192	-10.9863	-21.9727	-16.4795	-15.8691	-13.4277	-13.7329	-7.62939	-16.1743	-12.207
-14.9536	-21.0571	-9.76563	-21.0571	-23.8037	-15.2588	-25.3296	-25.3296	-9.46045	-24.1089	-11.9019	-17.395	-14.3433	-13.1226	-8.8501	-13.7329	-10.0708
-17.7002	-21.9727	-10.0708	-19.5312	-22.8882	-14.0381	-23.8037	-27.1606	-9.46045	-20.752	-14.3433	-18.6157	-14.3433	-7.93457	-9.15527	-14.6484	-11.2915
-14.9536	-21.6675	-6.71387	-19.5312	-20.752	-15.2588	-23.1934	-27.4658	-9.76563	-23.1934	-16.4795	-21.3623	-14.3433	-12.5122	-10.0708	-18.3105	-10.9863
-15.2588	-21.6675	-3.05176	-17.7002	-21.3623	-16.7847	-18.3105	-27.4658	-10.9863	-23.1934	-12.8174	-19.8364	-12.5122	-12.207	-11.2915	-15.2588	-8.8501
-14.3433	-21.3623	-7.32422	-17.7002	-20.1416	-15.8691	-19.5312	-25.9399	-7.01904	-18.3105	-14.9536	-17.7002	-14.3433	-8.54492	-10.6812	-14.3433	-14.0381
-16.1743	-19.8364	-6.71387	-21.9727	-16.4795	-17.0898	-19.8364	-24.4141	-9.46045	-20.752	-14.9536	-17.395	-15.564	-12.8174	-11.9019	-15.564	-15.8691
-17.0898	-22.583	-5.79834	-20.1416	-15.8691	-16.7847	-16.4795	-21.9727	-9.15527	-23.1934	-13.4277	-17.0898	-16.7847	-14.6484	-10.376	-13.1226	-15.2588
-19.2261	-22.8882	-9.15527	-18.3105	-16.4795	-19.5312	-15.564	-23.4985	-7.01904	-21.9727	-13.7329	-18.3105	-13.7329	-11.2915	-7.01904	-11.5967	-15.2588
-17.7002	-21.9727	-7.32422	-20.1416	-17.0898	-18.0054	-17.395	-22.8882	-8.54492	-20.752	-16.7847	-21.9727	-13.1226	-12.5122	-6.40869	-12.5122	-16.1743
-16.7847	-22.8882	-6.10352	-21.3623	-18.6157	-17.395	-14.9536	-22.2778	-7.62939	-21.9727	-13.4277	-19.2261	-12.8174	-15.2588	-7.32422	-13.4277	-15.2588
-18.6157	-21.6675	-9.46045	-21.0571	-18.0054	-17.0898	-15.8691	-24.1089	-5.79834	-17.7002	-14.6484	-17.7002	-9.46045	-11.9019	-4.88281	-14.6484	-17.395
-15.8691	-18.9209	-11.2915	-24.4141	-15.8691	-16.7847	-16.4795	-24.1089	-8.8501	-15.564	-17.395	-17.395	-11.5967	-10.9863	-4.27246	-17.0898	-20.4468
-13.7329	-16.7847	-10.376	-26.2451	-14.6484	-17.395	-11.2915	-23.1934	-7.93457	-18.0054	-14.6484	-17.0898	-14.0381	-13.1226	-7.93457	-13.4277	-16.1743
-17.0898	-14.9536	-10.9863	-21.3623	-15.564	-17.7002	-10.6812	-21.0571	-4.88281	-18.0054	-15.2588	-17.0898	-14.9536	-9.46045	-8.54492	-13.7329	-16.7847
-17.0898	-13.1226	-13.4277	-22.2778	-17.0898	-19.5312	-13.4277	-18.3105	-8.8501	-14.9536	-18.0054	-20.1416	-13.1226	-14.3433	-7.62939	-13.4277	-15.564
-15.8691	-14.6484	-10.6812	-20.4468	-15.8691	-20.752	-10.0708	-18.0054	-11.2915	-15.564	-17.7002	-19.2261	-12.5122	-14.0381	-10.0708	-13.1226	-14.0381
-18.9209	-13.7329	-9.76563	-19.8364	-16.7847	-20.752	-7.62939	-16.7847	-9.76563	-15.8691	-16.7847	-17.7002	-11.5967	-12.8174	-9.76563	-10.9863	-14.9536
-19.5312	-9.76563	-12.207	-20.4468	-17.0898	-20.1416	-11.9019	-18.0054	-12.8174	-11.5967	-16.7847	-20.1416	-11.5967	-10.0708	-10.376	-13.1226	-17.7002
-18.9209	-9.15527	-10.6812	-20.4468	-18.6157	-18.0054	-8.23975	-19.5312	-15.2588	-14.3433	-17.0898	-19.5312	-12.5122	-13.4277	-13.4277	-14.0381	-19.5312
-19.8364	-9.15527	-10.6812	-18.6157	-20.752	-17.7002	-7.62939	-19.5312	-14.6484	-14.9536	-17.7002	-18.6157	-10.6812	-12.5122	-10.376	-11.9019	-19.5312
-21.3623	-9.46045	-11.2915	-20.1416	-24.7192	-17.395	-10.376	-20.4468	-13.7329	-12.8174	-19.2261	-20.4468	-15.564	-9.46045	-7.01904	-13.4277	-21.3623
-18.3105	-8.23975	-10.6812	-21.3623	-22.2778	-16.7847	-10.0708	-19.2261	-14.9536	-14.0381	-17.7002	-19.2261	-16.4795	-13.7329	-11.9019	-13.4277	-18.9209
-15.2588	-7.62939	-5.79834	-18.9209	-22.2778	-19.2261	-5.79834	-21.3623	-15.564	-14.9536	-17.0898	-17.7002	-17.0898	-10.376	-10.376	-10.0708	-17.0898
-15.2588	-8.23975	-6.71387	-18.3105	-21.3623	-21.9727	-7.32422	-21.3623	-12.207	-14.3433	-18.6157	-18.6157	-15.8691	-11.2915	-7.01904	-9.46045	-18.0054
-13.7329	-7.93457	-6.10352	-23.4985	-21.9727	-21.3623	-8.54492	-18.6157	-12.5122	-13.4277	-17.395	-18.9209	-16.4795	-14.0381	-7.93457	-12.8174	-14.3433
-15.2588	-6.71387	-9.46045	-21.6675	-22.2778	-19.2261	-7.93457	-17.7002	-11.9019	-15.8691	-14.9536	-15.8691	-15.564	-13.4277	-7.62939	-12.8174	-14.6484
-16.7847	-6.40869	-11.2915	-21.9727	-19.8364	-19.8364	-9.76563	-18.3105	-9.15527	-15.564	-14.6484	-15.8691	-17.0898	-9.76563	-4.57764	-10.376	-15.8691
-11.9019	-5.18799	-11.2915	-24.7192	-20.752	-17.7002	-10.376	-19.8364	-11.5967	-16.4795	-14.3433	-18.3105	-18.6157	-14.3433	-5.18799	-10.0708	-17.0898
-12.8174	-6.40869	-11.5967	-22.8882	-18.6157	-16.4795	-6.71387	-18.3105	-12.8174	-17.0898	-9.76563	-17.395	-18.9209	-14.9536	-6.71387	-7.32422	-15.2588
-13.4277	-7.32422	-12.5122	-22.583	-16.7847	-16.7847	-8.54492	-19.2261	-13.1226	-16.4795	-10.9863	-16.7847	-21.3623	-10.9863	-1.83105	-7.93457	-18.6157
-10.0708	-6.71387	-10.9863	-26.5503	-16.1743	-15.8691	-9.76563	-19.2261	-17.395	-15.8691	-13.7329	-15.2588	-23.1934	-12.5122	-4.27246	-8.23975	-18.0054
-9.15527	-7.01904	-8.54492	-25.6348	-15.8691	-15.2588	-7.62939	-19.8364	-17.7002	-14.9536	-10.0708	-13.4277	-23.4985	-13.1226	-4.27246	-7.32422	-15.2588
-10.9863	-4.27246	-10.0708	-19.8364	-16.1743	-15.2588	-7.62939	-20.752	-16.7847	-13.7329	-12.207	-12.8174	-22.583	-11.9019	-3.66211	-4.57764	-18.0054
-7.32422	-3.96729	-8.54492	-19.5312	-16.4795	-16.1743	-11.9019	-21.0571	-19.2261	-13.4277	-14.3433	-16.4795	-21.9727	-13.1226	-6.71387	-7.93457	-17.0898
-4.88281	-5.79834	-6.40869	-19.2261	-16.4795	-18.9209	-10.0708	-19.5312	-19.5312	-14.0381	-12.5122	-15.564	-21.9727	-15.564	-8.23975	-7.93457	-15.8691
-7.32422	-4.88281	-7.62939	-19.5312	-14.6484	-18.6157	-7.93457	-21.6675	-18.3105	-12.207	-12.207	-14.9536	-21.9727	-12.8174	-6.40869	-7.62939	-15.2588
-6.71387	-3.35693	-8.23975	-20.752	-14.9536	-19.8364	-10.9863	-21.3623	-18.9209	-14.0381	-16.4795	-15.2588	-22.8882	-13.1226	-3.96729	-10.376	-15.2588
-1.83105	-2.13623	-7.62939	-22.8882	-14.6484	-22.583	-9.15527	-22.8882	-21.0571	-16.1743	-13.1226	-14.6484	-21.6675	-16.4795	-6.40869	-10.376	-11.2915
-3.96729	-3.96729	-9.46045	-20.4468	-14.6484	-23.1934	-10.6812	-23.4985	-18.6157	-14.0381	-13.4277	-14.6484	-20.4468	-11.5967	-3.66211	-9.46045	-10.6812
-5.18799	-4.88281	-9.76563	-21.6675	-14.0381	-23.8037	-15.8691	-24.4141	-20.4468	-14.3433	-15.2588	-18.3105	-21.3623	-13.1226	-2.13623	-12.8174	-12.207
-7.01904	-6.40869	-7.93457	-22.583	-14.0381	-22.2778	-16.4795	-22.8882	-20.1416	-16.7847	-15.2588	-18.3105	-22.583	-16.1743	-7.32422	-12.5122	-12.5122
-10.376	-4.88281	-10.9863	-19.8364	-14.6484	-20.752	-18.9209	-20.4468	-20.752	-19.2261	-14.9536	-19.2261	-18.9209	-16.7847	-4.27246	-11.9019	-13.1226
-9.76563	-3.35693	-13.1226	-18.9209	-13.7329	-22.2778	-19.8364	-21.6675	-21.0571	-14.9536	-17.0898	-20.1416	-15.2588	-17.7002	-2.44141	-14.3433	-13.1226
-10.376	-4.88281	-12.8174	-20.4468	-15.8691	-23.4985	-20.752	-21.0571	-22.583	-16.4795	-16.1743	-17.0898	-18.0054	-19.2261	-3.96729	-15.2588	-11.5967
-14.0381	-4.27246	-13.1226	-20.1416	-18.0054	-21.9727	-18.0054	-20.1416	-20.752	-20.1416	-18.0054	-16.7847	-19.8364	-16.7847	-4.27246	-12.5122	-9.76563
-17.395	-7.32422	-11.9019	-18.3105	-19.5312	-19.5312	-23.4985	-20.752	-18.6157	-19.5312	-23.8037	-17.0898	-19.8364	-17.7002	-2.44141	-13.4277	-10.376
-12.8174	-8.54492	-10.376	-20.4468	-19.8364	-20.4468	-23.8037	-21.0571	-22.2778	-22.8882	-24.1089	-18.0054	-19.8364	-22.2778	-4.57764	-14.3433	-8.8501
-14.6484	-7.93457	-8.54492	-19.2261	-18.0054	-22.2778	-23.4985	-20.1416	-19.8364	-25.9399	-23.8037	-16.4795	-18.9209	-18.0054	-4.27246	-11.5967	-8.23975
-12.207	-6.40869	-13.4277	-20.4468	-18.6157	-22.8882	-25.0244	-20.752	-17.0898	-25.6348	-25.9399	-21.3623	-19.2261	-15.8691	-3.66211	-11.2915	-8.8501
-10.9863	-6.10352	-10.9863	-21.0571	-19.8364	-20.752	-24.4141	-22.583	-17.0898	-25.6348	-23.4985	-24.1089	-21.0571	-18.3105	-6.71387	-13.1226	-6.71387
-14.3433	-4.88281	-8.8501	-16.4795	-21.3623	-18.0054	-21.0571	-21.0571	-15.8691	-26.8555	-21.6675	-22.583	-20.4468	-20.1416	-8.54492	-10.9863	-6.71387
-14.9536	-5.49316	-10.0708	-14.0381	-20.1416	-18.6157	-21.9727	-21.9727	-17.7002	-26.2451	-22.583	-22.2778	-18.3105	-18.6157	-4.57764	-12.5122	-7.93457
-12.5122	-5.79834	-8.8501	-15.564	-19.8364	-20.4468	-21.9727	-20.4468	-17.395	-25.3296	-23.4985	-25.3296	-22.2778	-20.1416	-5.18799	-15.2588	-10.6812
-14.0381	-6.10352	-7.93457	-14.3433	-18.3105	-18.3105	-16.4795	-17.0898	-16.1743	-27.1606	-21.3623	-24.4141	-21.3623	-20.1416	-7.01904	-12.8174	-8.54492
-18.6157	-5.49316	-12.8174	-14.3433	-17.7002	-18.0054	-16.1743	-19.5312	-12.207	-24.1089	-23.1934	-22.2778	-18.3105	-13.4277	-5.79834	-10.6812	-10.9863
-17.395	-4.57764	-14.3433	-19.8364	-18.9209	-18.3105	-16.7847	-22.2778	-15.2588	-22.8882	-22.583	-24.1089	-18.0054	-16.7847	-6.40869	-12.8174	-12.5122
-16.4795	-6.10352	-9.15527	-20.752	-20.752	-18.3105	-14.3433	-21.6675	-13.7329	-26.2451	-19.2261	-22.2778	-19.5312	-21.3623	-8.8501	-12.207	-9.46045
-18.6157	-7.62939	-8.8501	-18.9209	-22.583	-17.7002	-14.0381	-20.4468	-9.76563	-26.2451	-18.0054	-19.5312	-20.4468	-23.1934	-6.10352	-11.9019	-11.2915
-18.6157	-6.10352	-10.0708	-22.2778	-21.9727	-18.3105	-14.3433	-19.2261	-13.4277	-25.0244	-19.2261	-18.6157	-22.2778	-24.4141	-8.54492	-13.7329	-12.5122
-18.6157	-4.57764	-8.23975	-21.6675	-21.9727	-20.1416	-11.9019	-16.7847	-12.207	-25.3296	-21.3623	-17.7002	-22.8882	-24.7192	-9.76563	-14.0381	-13.1226
-20.1416	-3.35693	-6.40869	-22.8882	-19.5312	-20.4468	-11.2915	-17.395	-9.76563	-24.7192	-19.5312	-20.1416	-19.8364	-24.1089	-4.57764	-11.9019	-15.8691
-21.6675	-2.13623	-7.93457	-26.5503	-20.1416	-21.9727	-15.564	-18.6157	-11.9019	-23.1934	-20.4468	-21.3623	-21.6675	-22.583	-3.35693	-14.0381	-17.7002
-19.5312	-4.57764	-6.40869	-27.1606	-21.6675	-22.2778	-15.8691	-16.7847	-14.6484	-22.583	-18.3105	-20.752	-23.4985	-25.0244	-5.18799	-13.4277	-14.0381
-19.2261	-6.71387	-5.18799	-22.8882	-20.752	-21.6675	-13.1226	-19.8364	-11.5967	-22.2778	-19.2261	-18.0054	-21.6675	-22.583	-2.44141	-14.0381	-16.1743
-20.1416	-5.49316	-7.93457	-23.4985	-21.6675	-21.6675	-14.3433	-24.1089	-12.207	-20.4468	-21.6675	-21.6675	-23.4985	-22.8882	-3.05176	-14.9536	-21.3623
-18.6157	-4.88281	-3.66211	-25.3296	-22.2778	-23.8037	-15.8691	-22.583	-15.2588	-20.1416	-20.752	-21.6675	-24.1089	-23.4985	-8.8501	-14.9536	-21.6675
-19.8364	-6.40869	-1.83105	-21.3623	-22.583	-21.0571	-16.1743	-24.7192	-13.4277	-22.583	-19.2261	-22.8882	-24.4141	-22.583	-6.10352	-14.3433	-20.752
-21.9727	-7.62939	-4.57764	-21.0571	-21.6675	-18.6157	-18.3105	-26.5503	-13.7329	-19.2261	-19.8364	-23.4985	-22.2778	-24.1089	-5.49316	-15.2588	-21.6675
-18.3105	-5.79834	-2.13623	-23.8037	-22.2778	-18.3105	-18.3105	-29.2969	-14.3433	-18.3105	-18.3105	-24.4141	-25.9399	-24.7192	-9.46045	-15.2588	-21.6675
-18.6157	-6.71387	-3.05176	-19.5312	-23.1934	-16.1743	-13.7329	-28.9917	-12.5122	-18.9209	-15.2588	-26.2451	-25.0244	-23.8037	-8.23975	-12.8174	-20.1416
-17.7002	-9.76563	-5.79834	-16.1743	-21.9727	-14.6484	-14.6484	-29.2969	-11.9019	-14.9536	-19.2261	-23.8037	-24.4141	-23.8037	-6.40869	-14.9536	-20.4468
-14.6484	-11.9019	-7.32422	-18.9209	-23.4985	-15.8691	-15.564	-30.2124	-13.1226	-14.3433	-19.5312	-25.3296	-25.6348	-27.771	-7.93457	-17.395	-21.6675
-17.0898	-10.376	-4.88281	-17.7002	-21.6675	-15.564	-13.7329	-32.0435	-13.4277	-15.2588	-15.2588	-25.0244	-22.8882	-26.2451	-7.93457	-14.3433	-20.752
-18.6157	-8.54492	-8.23975	-14.9536	-23.8037	-14.3433	-14.9536	-32.3486	-14.3433	-11.2915	-14.6484	-27.771	-21.3623	-25.0244	-7.32422	-15.8691	-22.2778
-16.7847	-10.376	-8.54492	-18.9209	-24.7192	-14.3433	-16.4795	-28.6865	-18.0054	-12.207	-14.3433	-26.2451	-23.1934	-28.0762	-8.8501	-18.0054	-21.6675
-14.3433	-11.2915	-8.8501	-18.9209	-22.8882	-13.1226	-14.9536	-26.5503	-16.4795	-13.1226	-13.4277	-24.1089	-26.5503	-24.1089	-8.54492	-14.9536	-19.8364
-16.7847	-13.1226	-12.207	-17.395	-23.4985	-11.9019	-14.0381	-24.7192	-13.7329	-11.9019	-13.7329	-23.4985	-22.8882	-21.6675	-6.40869	-14.6484	-18.9209
-15.8691	-11.5967	-11.2915	-19.5312	-28.0762	-11.5967	-16.4795	-26.5503	-15.8691	-8.8501	-15.2588	-22.583	-25.3296	-20.4468	-8.54492	-21.0571	-18.3105
-14.3433	-10.0708	-8.8501	-20.4468	-28.3814	-11.2915	-14.6484	-24.4141	-16.1743	-10.6812	-12.207	-25.3296	-26.5503	-19.2261	-10.9863	-20.752	-17.0898
-17.0898	-10.376	-9.15527	-18.6157	-25.6348	-12.207	-14.0381	-25.0244	-12.8174	-9.76563	-11.9019	-24.4141	-23.8037	-16.4795	-10.376	-16.7847	-18.0054
-14.9536	-9.15527	-11.2915	-19.5312	-26.8555	-17.0898	-17.0898	-24.1089	-13.4277	-9.15527	-15.2588	-23.8037	-25.0244	-16.1743	-14.0381	-17.7002	-21.3623
-13.1226	-9.46045	-9.46045	-19.2261	-27.771	-18.3105	-16.4795	-23.8037	-13.7329	-11.5967	-13.7329	-22.583	-26.2451	-17.7002	-14.9536	-14.0381	-20.1416
-13.7329	-12.207	-10.6812	-13.1226	-28.6865	-15.2588	-15.8691	-25.9399	-12.8174	-11.9019	-13.4277	-21.6675	-27.1606	-14.9536	-12.5122	-15.2588	-20.752
-15.2588	-14.3433	-11.5967	-18.6157	-26.8555	-19.2261	-17.7002	-28.0762	-14.9536	-9.15527	-15.564	-21.6675	-27.1606	-13.7329	-14.3433	-16.7847	-21.0571
-13.1226	-13.4277	-8.8501	-19.8364	-25.6348	-19.8364	-17.7002	-25.3296	-14.9536	-10.376	-12.8174	-20.752	-27.1606	-14.0381	-16.4795	-17.7002	-19.8364
-16.1743	-13.7329	-8.54492	-19.2261	-23.4985	-18.0054	-14.3433	-21.6675	-14.0381	-9.76563	-12.8174	-22.8882	-23.8037	-13.1226	-13.7329	-17.0898	-17.7002
-19.5312	-14.0381	-9.15527	-22.2778	-25.3296	-18.9209	-15.8691	-20.1416	-14.9536	-7.32422	-16.4795	-24.4141	-22.583	-11.2915	-14.3433	-16.7847	-17.0898
-14.9536	-14.0381	-10.0708	-24.7192	-26.8555	-21.9727	-15.8691	-16.4795	-14.0381	-10.376	-14.9536	-24.1089	-24.7192	-12.8174	-16.7847	-16.7847	-18.6157
-15.564	-14.3433	-9.46045	-22.8882	-24.1089	-18.0054	-13.1226	-14.9536	-9.46045	-10.6812	-12.5122	-21.9727	-23.1934	-13.1226	-16.1743	-12.8174	-16.1743
-13.7329	-15.8691	-10.6812	-23.1934	-25.3296	-16.7847	-16.1743	-15.2588	-7.32422	-11.5967	-13.1226	-22.8882	-22.583	-10.9863	-17.395	-15.564	-17.395
-14.6484	-14.3433	-10.6812	-25.9399	-26.8555	-20.752	-17.0898	-14.9536	-9.76563	-9.15527	-10.9863	-20.4468	-23.8037	-10.9863	-20.4468	-15.564	-15.564
-14.6484	-13.1226	-11.5967	-22.2778	-26.5503	-19.2261	-15.564	-12.5122	-7.01904	-10.6812	-9.46045	-20.752	-25.0244	-10.376	-17.395	-13.1226	-15.8691
-16.7847	-12.207	-12.5122	-23.4985	-26.2451	-17.0898	-14.0381	-15.564	-5.18799	-11.9019	-8.8501	-20.4468	-24.7192	-9.76563	-15.564	-14.3433	-14.9536
-14.9536	-13.1226	-11.9019	-25.6348	-27.1606	-19.8364	-12.8174	-17.0898	-5.79834	-11.2915	-6.71387	-20.4468	-24.1089	-10.0708	-20.4468	-15.2588	-13.1226
-13.1226	-11.2915	-9.15527	-26.8555	-26.8555	-18.9209	-10.6812	-14.9536	-3.05176	-12.8174	-5.18799	-20.752	-24.4141	-11.2915	-19.5312	-13.1226	-11.9019
-15.8691	-11.9019	-9.76563	-24.7192	-25.9399	-16.4795	-12.5122	-13.4277	-1.2207	-10.9863	-8.8501	-19.5312	-25.3296	-7.01904	-14.9536	-12.8174	-13.7329
-15.2588	-12.207	-8.54492	-26.5503	-28.0762	-20.1416	-13.4277	-11.9019	-0.91553	-11.9019	-11.2915	-20.4468	-28.0762	-6.40869	-16.4795	-15.2588	-13.1226
-13.1226	-12.207	-5.18799	-26.5503	-25.0244	-21.0571	-10.9863	-11.2915	-2.13623	-13.7329	-10.0708	-19.2261	-26.5503	-7.62939	-16.7847	-11.2915	-12.8174
-14.9536	-12.5122	-7.32422	-26.5503	-26.2451	-18.3105	-13.1226	-13.7329	-2.13623	-14.3433	-11.5967	-18.3105	-24.1089	-5.79834	-13.4277	-13.1226	-14.3433
-14.3433	-11.5967	-7.32422	-31.4331	-24.1089	-19.2261	-13.7329	-13.7329	-4.27246	-14.0381	-12.5122	-19.2261	-23.4985	-8.8501	-16.4795	-17.0898	-12.8174
-13.1226	-10.6812	-3.96729	-27.1606	-23.4985	-20.1416	-13.4277	-14.3433	-6.10352	-15.2588	-12.5122	-18.6157	-22.8882	-9.46045	-16.1743	-15.564	-10.6812
-14.3433	-12.207	-3.66211	-25.3296	-20.752	-21.0571	-14.0381	-13.1226	-6.40869	-15.2588	-13.1226	-17.395	-18.3105	-7.01904	-13.7329	-11.9019	-11.2915
-16.7847	-11.9019	-3.35693	-25.9399	-21.0571	-22.8882	-15.8691	-13.4277	-5.18799	-14.0381	-15.564	-16.4795	-19.8364	-5.79834	-14.6484	-10.6812	-14.3433
-15.2588	-10.9863	-0.30518	-25.0244	-23.1934	-19.8364	-14.0381	-10.376	-5.18799	-13.7329	-12.5122	-17.395	-20.1416	-6.40869	-14.9536	-10.0708	-15.2588
-17.0898	-10.6812	-0.30518	-22.583	-20.752	-18.3105	-11.9019	-12.207	-4.88281	-14.3433	-13.4277	-18.3105	-17.395	-6.10352	-12.207	-9.15527	-15.564
-17.395	-10.9863	-0.30518	-23.1934	-23.8037	-19.8364	-15.564	-16.7847	-2.44141	-16.1743	-17.0898	-19.8364	-18.9209	-6.71387	-11.5967	-13.7329	-14.9536
-15.564	-9.76563	4.27246	-25.0244	-22.8882	-23.1934	-15.2588	-16.4795	-3.05176	-19.8364	-16.7847	-18.9209	-21.0571	-7.62939	-14.6484	-13.4277	-13.7329
-17.395	-9.46045	2.74658	-20.4468	-24.1089	-19.8364	-13.4277	-17.0898	-3.35693	-18.3105	-15.564	-16.7847	-18.3105	-7.01904	-12.5122	-12.207	-14.6484
-20.752	-8.54492	0.91553	-21.6675	-23.4985	-20.1416	-16.7847	-15.564	-9.76563	-16.7847	-17.0898	-18.0054	-18.9209	-8.54492	-12.207	-14.0381	-14.0381
-17.0898	-7.62939	0.91553	-25.0244	-24.4141	-21.6675	-16.4795	-17.7002	-10.9863	-16.4795	-14.9536	-18.0054	-23.1934	-10.0708	-11.2915	-14.6484	-14.6484
-15.564	-7.62939	0	-21.6675	-22.8882	-22.2778	-15.2588	-15.564	-9.46045	-15.564	-12.207	-18.9209	-20.4468	-8.8501	-7.01904	-15.8691	-12.5122
-14.9536	-6.40869	-3.66211	-21.9727	-21.9727	-22.583	-17.395	-19.8364	-7.62939	-12.8174	-15.564	-19.8364	-18.6157	-8.23975	-7.93457	-18.6157	-13.7329
-11.9019	-7.62939	-0.30518	-23.8037	-22.8882	-21.0571	-17.7002	-20.1416	-6.71387	-13.1226	-14.3433	-18.9209	-20.4468	-10.6812	-10.376	-19.5312	-14.3433
-12.5122	-6.71387	2.13623	-24.7192	-19.8364	-20.4468	-14.6484	-18.9209	-8.54492	-12.5122	-12.8174	-19.8364	-18.6157	-11.2915	-12.207	-18.9209	-14.9536
-13.4277	-8.23975	1.83105	-26.2451	-21.0571	-18.3105	-16.7847	-21.9727	-6.10352	-11.5967	-17.7002	-18.9209	-16.1743	-6.71387	-10.9863	-18.3105	-18.0054
-10.6812	-4.88281	0.30518	-30.5176	-22.8882	-19.2261	-15.564	-23.4985	-5.79834	-10.376	-15.2588	-16.7847	-17.0898	-10.0708	-14.6484	-18.9209	-18.0054
-10.0708	-4.88281	-0.30518	-27.4658	-25.6348	-18.9209	-12.8174	-21.6675	-5.18799	-14.3433	-14.0381	-15.564	-18.9209	-9.46045	-13.1226	-15.8691	-17.395
-12.5122	-4.88281	0.91553	-27.771	-24.1089	-18.6157	-15.8691	-19.8364	-5.49316	-18.3105	-14.6484	-19.2261	-16.4795	-7.93457	-11.9019	-16.1743	-15.2588
-10.376	-3.05176	3.66211	-32.3486	-24.7192	-18.3105	-16.4795	-19.2261	-7.32422	-20.1416	-16.4795	-19.5312	-18.0054	-8.54492	-14.0381	-19.2261	-14.3433
-8.54492	-2.13623	3.05176	-29.9072	-21.3623	-17.395	-15.8691	-19.2261	-6.10352	-20.1416	-14.3433	-19.8364	-19.2261	-8.8501	-11.9019	-18.9209	-14.0381
-13.1226	-5.49316	3.05176	-29.9072	-18.0054	-17.395	-14.9536	-21.0571	-7.32422	-23.4985	-18.3105	-20.1416	-16.1743	-8.23975	-8.23975	-16.1743	-13.1226
-10.9863	-7.62939	0.30518	-33.8745	-20.4468	-19.2261	-16.1743	-18.6157	-6.10352	-25.6348	-19.2261	-19.8364	-18.6157	-7.01904	-6.71387	-19.2261	-13.4277
-6.40869	-6.40869	2.74658	-33.8745	-18.6157	-21.6675	-13.1226	-17.0898	-9.76563	-24.1089	-16.1743	-18.3105	-21.3623	-9.76563	-8.54492	-16.4795	-13.1226
-8.54492	-7.93457	-1.2207	-28.0762	-16.4795	-20.1416	-14.6484	-18.9209	-8.23975	-22.2778	-19.2261	-18.3105	-20.4468	-10.0708	-5.79834	-13.1226	-12.8174
-8.54492	-7.62939	-3.96729	-30.2124	-18.6157	-17.395	-16.7847	-19.8364	-8.8501	-22.2778	-22.2778	-19.5312	-21.0571	-13.7329	-6.10352	-16.4795	-11.9019
-6.10352	-5.79834	-1.52588	-28.0762	-17.395	-19.5312	-15.2588	-18.6157	-9.76563	-24.7192	-20.752	-17.7002	-21.9727	-14.3433	-8.23975	-16.7847	-13.1226
-8.23975	-7.01904	-0.91553	-25.6348	-15.8691	-17.7002	-15.564	-18.3105	-9.76563	-25.6348	-22.8882	-21.0571	-19.2261	-11.5967	-3.96729	-13.4277	-15.2588
-10.0708	-6.10352	-4.27246	-26.2451	-15.564	-17.395	-15.8691	-19.2261	-8.23975	-25.6348	-26.8555	-20.4468	-19.8364	-10.0708	-2.13623	-14.9536	-12.207
-7.32422	-4.57764	-3.05176	-25.6348	-18.9209	-18.6157	-14.9536	-17.395	-5.49316	-25.0244	-26.2451	-19.5312	-22.2778	-10.6812	-3.66211	-16.1743	-11.2915
-5.18799	-3.66211	-2.74658	-23.4985	-19.8364	-15.2588	-14.0381	-17.395	-5.49316	-23.8037	-25.0244	-21.0571	-18.3105	-10.9863	-0.91553	-13.7329	-12.5122
-7.01904	-7.93457	-5.18799	-23.8037	-23.1934	-16.7847	-15.564	-19.5312	-4.88281	-23.4985	-25.9399	-22.583	-16.7847	-8.54492	-0.61035	-15.564	-14.6484
-3.96729	-7.62939	-3.66211	-26.5503	-24.1089	-20.1416	-15.564	-19.8364	-5.49316	-23.1934	-22.583	-23.1934	-18.3105	-9.46045	-5.79834	-16.4795	-14.6484
-3.66211	-7.62939	-5.49316	-24.4141	-21.0571	-19.5312	-13.4277	-20.4468	-3.96729	-22.583	-22.2778	-18.9209	-17.7002	-7.01904	-6.10352	-16.1743	-13.1226
-6.40869	-9.76563	-10.6812	-24.7192	-21.3623	-17.0898	-15.8691	-18.9209	-2.13623	-24.1089	-23.4985	-18.0054	-15.8691	-9.76563	-8.23975	-17.0898	-11.9019
-4.27246	-10.0708	-9.15527	-23.8037	-22.2778	-18.0054	-19.8364	-20.4468	-1.2207	-20.1416	-19.8364	-17.7002	-17.7002	-12.8174	-12.5122	-20.1416	-11.9019
-5.49316	-9.76563	-8.23975	-22.583	-20.1416	-17.0898	-17.395	-18.6157	-1.2207	-17.0898	-18.9209	-16.1743	-15.8691	-12.207	-7.93457	-18.3105	-12.8174
-10.9863	-9.15527	-13.1226	-22.2778	-18.9209	-14.3433	-16.4795	-20.1416	-1.52588	-19.8364	-20.4468	-13.4277	-14.6484	-13.4277	-6.10352	-19.2261	-12.5122
-10.6812	-8.23975	-11.2915	-22.2778	-20.752	-15.2588	-19.5312	-22.583	0.61035	-18.6157	-19.2261	-11.9019	-17.0898	-14.3433	-7.01904	-21.3623	-13.4277
-8.54492	-6.10352	-11.2915	-19.8364	-18.0054	-16.7847	-18.3105	-21.0571	-1.52588	-18.0054	-17.395	-13.7329	-14.6484	-17.395	-3.66211	-19.2261	-11.2915
-8.54492	-5.49316	-13.4277	-22.2778	-16.7847	-14.3433	-18.3105	-23.1934	-1.2207	-19.5312	-18.3105	-14.0381	-13.7329	-13.7329	0.61035	-18.0054	-11.5967
-7.01904	-6.71387	-13.4277	-26.8555	-21.0571	-13.7329	-18.6157	-24.1089	-1.2207	-18.6157	-16.1743	-12.5122	-13.7329	-14.3433	-3.35693	-19.8364	-11.2915
-5.18799	-7.01904	-13.7329	-25.3296	-22.8882	-15.8691	-16.1743	-24.4141	-5.79834	-17.0898	-15.8691	-10.9863	-16.7847	-14.0381	-4.57764	-18.3105	-11.5967
-7.62939	-10.6812	-16.4795	-23.4985	-24.1089	-11.9019	-15.2588	-26.5503	-7.93457	-17.0898	-17.7002	-14.0381	-15.2588	-10.376	-3.35693	-16.7847	-12.207
-8.8501	-10.6812	-14.9536	-27.4658	-24.7192	-13.1226	-14.0381	-28.6865	-10.0708	-18.6157	-18.6157	-15.2588	-16.7847	-11.2915	-9.15527	-17.395	-9.46045
-5.79834	-9.15527	-11.2915	-26.2451	-23.8037	-15.2588	-14.6484	-25.6348	-7.62939	-16.4795	-18.3105	-15.8691	-18.6157	-10.9863	-10.9863	-15.2588	-8.54492
-10.9863	-7.01904	-17.395	-23.8037	-21.9727	-16.1743	-12.207	-25.3296	-10.9863	-19.5312	-19.5312	-14.3433	-16.1743	-10.0708	-9.15527	-12.207	-7.62939
-11.5967	-6.40869	-19.8364	-24.4141	-21.9727	-17.395	-12.8174	-26.2451	-9.76563	-21.9727	-20.752	-12.8174	-18.9209	-9.76563	-11.2915	-14.6484	-6.71387
-7.32422	-4.88281	-19.8364	-21.6675	-24.4141	-20.752	-12.207	-25.3296	-10.0708	-21.0571	-21.0571	-12.207	-19.8364	-12.207	-11.2915	-14.0381	-9.46045
-9.15527	-6.71387	-21.6675	-21.3623	-23.8037	-18.0054	-13.4277	-25.3296	-7.93457	-19.8364	-23.4985	-13.7329	-19.5312	-10.376	-9.46045	-12.207	-11.5967
-10.9863	-9.15527	-23.1934	-24.7192	-22.583	-16.4795	-17.395	-25.6348	-6.40869	-20.4468	-21.0571	-16.7847	-21.6675	-7.93457	-11.2915	-14.0381	-14.0381
-8.54492	-5.49316	-21.0571	-26.8555	-24.4141	-20.752	-17.395	-22.8882	-4.57764	-20.4468	-19.8364	-17.0898	-25.0244	-7.32422	-12.5122	-12.8174	-14.6484
-8.23975	-5.18799	-21.3623	-27.4658	-25.9399	-18.0054	-17.7002	-21.9727	-5.79834	-19.5312	-21.9727	-18.9209	-21.3623	-4.27246	-11.2915	-10.0708	-14.6484
-10.6812	-10.0708	-23.4985	-31.7383	-23.1934	-17.395	-18.3105	-22.2778	-7.93457	-19.5312	-22.583	-17.395	-21.0571	-4.27246	-10.6812	-11.2915	-10.6812
-7.01904	-7.62939	-21.9727	-30.8227	-26.8555	-21.9727	-16.4795	-21.3623	-8.54492	-17.395	-20.4468	-16.4795	-22.583	-10.376	-13.1226	-14.0381	-10.9863
-7.01904	-6.40869	-21.9727	-28.6865	-27.1606	-21.3623	-15.564	-19.8364	-9.76563	-13.4277	-21.3623	-15.8691	-18.9209	-10.0708	-12.207	-11.5967	-11.9019
-8.8501	-6.71387	-24.1089	-28.0762	-28.0762	-20.1416	-17.0898	-21.9727	-7.01904	-13.7329	-22.2778	-14.9536	-18.0054	-5.49316	-13.1226	-12.8174	-12.8174
-4.88281	-6.10352	-19.5312	-28.0762	-32.959	-20.4468	-18.9209	-20.4468	-4.88281	-12.207	-18.6157	-13.7329	-23.4985	-9.15527	-15.2588	-12.5122	-13.4277
-3.35693	-5.49316	-15.8691	-26.2451	-30.2124	-21.0571	-17.7002	-17.395	-5.49316	-11.2915	-17.0898	-13.7329	-21.6675	-6.71387	-15.8691	-10.0708	-16.1743
-7.93457	-7.93457	-17.7002	-28.9917	-29.9072	-18.3105	-17.7002	-17.395	-5.49316	-13.1226	-18.0054	-13.4277	-21.3623	-6.10352	-13.7329	-11.5967	-15.8691
-7.93457	-7.01904	-19.5312	-29.9072	-29.602	-22.583	-16.7847	-16.4795	-6.40869	-10.9863	-16.4795	-14.3433	-23.1934	-8.54492	-14.6484	-13.4277	-13.7329
-8.8501	-2.44141	-17.7002	-28.0762	-28.3814	-21.3623	-16.7847	-15.8691	-6.71387	-7.93457	-16.1743	-15.564	-23.8037	-9.46045	-14.9536	-8.54492	-15.8691
-13.4277	-4.88281	-18.9209	-28.0762	-30.8227	-17.0898	-18.3105	-18.6157	-7.01904	-8.8501	-16.1743	-14.9536	-23.1934	-7.62939	-14.9536	-6.71387	-12.8174
-14.6484	-5.49316	-19.2261	-29.2969	-35.7056	-19.2261	-20.752	-19.2261	-4.27246	-5.79834	-15.564	-15.564	-22.8882	-6.10352	-15.564	-9.15527	-12.8174
-12.207	-5.79834	-16.1743	-29.9072	-33.8745	-21.6675	-18.3105	-19.2261	-2.74658	-4.27246	-12.8174	-16.7847	-21.3623	-8.23975	-14.0381	-9.46045	-13.7329
-14.3433	-8.23975	-18.0054	-31.7383	-34.1797	-20.4468	-16.7847	-22.2778	-4.88281	-5.79834	-14.3433	-14.9536	-19.5312	-7.93457	-11.2915	-9.46045	-11.5967
-14.6484	-7.93457	-17.0898	-35.7056	-36.3159	-18.3105	-20.4468	-21.9727	-6.71387	-6.10352	-12.8174	-16.1743	-19.8364	-8.8501	-14.0381	-11.5967	-10.6812
-12.5122	-5.49316	-14.9536	-33.2642	-37.5366	-16.1743	-17.395	-18.6157	-9.15527	-3.96729	-11.2915	-16.1743	-21.3623	-7.93457	-14.3433	-10.6812	-11.9019
-13.4277	-6.40869	-15.8691	-29.2969	-37.8418	-11.9019	-18.3105	-16.4795	-7.32422	-7.01904	-12.207	-16.1743	-19.5312	-4.88281	-14.3433	-10.0708	-11.2915
-16.1743	-8.54492	-16.7847	-33.2642	-35.7056	-15.2588	-16.7847	-14.9536	-6.40869	-7.93457	-12.5122	-16.7847	-20.752	-6.40869	-20.1416	-14.6484	-7.62939
-12.207	-7.62939	-12.8174	-29.9072	-36.6211	-16.4795	-16.7847	-13.4277	-7.62939	-6.71387	-14.3433	-18.6157	-24.4141	-7.01904	-20.4468	-15.8691	-9.15527
-11.5967	-7.62939	-14.3433	-27.4658	-33.5693	-12.8174	-16.4795	-14.0381	-9.46045	-7.01904	-13.7329	-18.9209	-23.4985	-7.62939	-19.8364	-10.9863	-10.0708
-14.6484	-9.46045	-17.7002	-28.3814	-33.2642	-14.9536	-15.564	-15.564	-6.71387	-6.10352	-13.1226	-15.8691	-25.3296	-6.10352	-22.2778	-12.207	-7.62939
-9.46045	-8.8501	-16.1743	-27.771	-31.7383	-16.7847	-14.9536	-12.207	-4.57764	-7.32422	-10.9863	-16.4795	-23.8037	-6.71387	-22.2778	-12.207	-9.46045
-10.0708	-9.46045	-18.9209	-25.6348	-28.0762	-14.3433	-13.7329	-11.9019	-6.40869	-10.0708	-13.4277	-15.2588	-21.0571	-5.79834	-16.1743	-8.54492	-9.15527
-12.8174	-9.76563	-21.3623	-27.4658	-27.771	-15.564	-14.6484	-14.3433	-6.10352	-12.5122	-15.564	-17.0898	-20.4468	-7.62939	-15.564	-12.5122	-7.93457
-11.5967	-8.54492	-22.2778	-28.9917	-25.9399	-18.0054	-14.9536	-13.4277	-5.79834	-10.6812	-15.8691	-16.7847	-21.0571	-8.8501	-18.0054	-10.6812	-8.23975
-13.1226	-10.6812	-25.6348	-25.3296	-25.3296	-16.7847	-15.8691	-13.1226	-9.46045	-10.376	-17.7002	-14.9536	-19.2261	-5.79834	-15.564	-8.54492	-9.15527
-15.8691	-11.5967	-28.0762	-27.1606	-24.7192	-13.1226	-15.2588	-14.6484	-10.0708	-10.6812	-18.6157	-20.4468	-20.752	-5.49316	-15.564	-10.6812	-7.62939
-13.1226	-9.76563	-22.2778	-25.9399	-25.6348	-16.1743	-14.3433	-16.4795	-7.32422	-9.76563	-19.8364	-24.1089	-22.8882	-4.57764	-18.3105	-14.0381	-7.93457
-11.9019	-8.8501	-20.1416	-23.8037	-21.0571	-15.8691	-14.6484	-15.564	-8.8501	-8.23975	-18.9209	-23.1934	-17.395	-5.18799	-15.8691	-10.9863	-9.46045
-16.4795	-10.9863	-23.8037	-25.6348	-19.5312	-13.4277	-14.9536	-16.4795	-10.6812	-8.8501	-16.7847	-22.8882	-16.1743	-3.96729	-15.2588	-11.9019	-5.79834
-13.7329	-11.2915	-22.2778	-27.1606	-21.6675	-15.564	-16.4795	-16.1743	-11.2915	-10.9863	-16.4795	-25.0244	-19.8364	-6.71387	-16.7847	-15.2588	-5.79834
-13.7329	-8.54492	-20.4468	-23.8037	-19.2261	-15.2588	-15.2588	-15.8691	-14.3433	-12.207	-15.564	-22.8882	-19.5312	-7.32422	-14.0381	-11.9019	-7.93457
-14.3433	-12.5122	-22.8882	-24.4141	-19.2261	-11.9019	-17.395	-18.6157	-13.4277	-14.3433	-15.8691	-21.0571	-18.6157	-5.79834	-12.207	-9.15527	-12.207
-14.6484	-13.4277	-23.4985	-25.3296	-21.0571	-15.564	-17.0898	-19.8364	-10.6812	-11.2915	-14.6484	-23.8037	-21.3623	-8.54492	-14.6484	-11.2915	-9.76563
-15.2588	-11.5967	-20.4468	-21.6675	-23.1934	-17.395	-15.8691	-19.2261	-12.207	-10.9863	-15.8691	-21.9727	-22.2778	-9.15527	-12.207	-10.0708	-9.46045
-17.0898	-14.0381	-18.9209	-21.9727	-22.8882	-14.0381	-13.4277	-19.5312	-13.1226	-12.5122	-16.4795	-22.583	-22.583	-8.8501	-9.46045	-8.8501	-7.01904
-14.6484	-14.3433	-15.564	-23.1934	-24.1089	-14.3433	-12.5122	-18.9209	-11.2915	-12.207	-16.1743	-20.752	-23.1934	-8.8501	-10.0708	-11.2915	-7.32422
-11.5967	-13.1226	-11.9019	-19.5312	-22.8882	-15.2588	-9.46045	-16.4795	-10.6812	-13.4277	-17.7002	-22.2778	-21.9727	-11.5967	-10.0708	-11.9019	-7.32422
-14.3433	-15.2588	-12.8174	-17.7002	-21.0571	-13.1226	-8.23975	-15.2588	-10.9863	-15.564	-17.0898	-22.2778	-19.8364	-13.1226	-8.54492	-10.0708	-6.40869
-15.564	-14.9536	-13.4277	-19.2261	-23.8037	-12.5122	-11.5967	-15.8691	-10.0708	-11.2915	-17.395	-23.4985	-22.8882	-12.8174	-11.5967	-12.5122	-6.10352
-13.1226	-11.2915	-10.376	-15.8691	-23.4985	-12.207	-11.2915	-14.9536	-11.9019	-9.15527	-18.0054	-22.2778	-26.2451	-12.8174	-10.9863	-11.5967	-7.93457
-15.8691	-14.9536	-11.2915	-13.7329	-22.583	-8.54492	-11.5967	-12.8174	-10.376	-10.9863	-20.1416	-21.0571	-22.583	-11.9019	-9.46045	-8.8501	-8.54492
-17.0898	-17.395	-12.207	-15.8691	-24.7192	-8.23975	-9.76563	-10.9863	-10.0708	-13.4277	-18.9209	-20.1416	-22.2778	-12.5122	-9.15527	-11.2915	-6.10352
-16.1743	-17.395	-5.79834	-14.9536	-24.4141	-12.5122	-10.0708	-10.376	-11.9019	-13.7329	-18.0054	-20.1416	-21.9727	-15.8691	-10.6812	-14.0381	-7.32422
-14.6484	-17.7002	-7.62939	-12.5122	-22.2778	-9.76563	-10.376	-12.5122	-14.3433	-12.207	-17.0898	-18.6157	-18.3105	-15.2588	-9.15527	-12.8174	-8.8501
-15.564	-16.4795	-7.93457	-16.1743	-23.4985	-11.2915	-8.54492	-14.9536	-15.564	-14.6484	-16.7847	-16.1743	-16.4795	-14.0381	-12.207	-15.8691	-6.71387
-12.8174	-17.0898	-6.71387	-18.9209	-27.1606	-14.0381	-8.8501	-13.7329	-15.2588	-15.8691	-17.0898	-17.0898	-18.3105	-15.564	-16.4795	-20.4468	-5.49316
-11.9019	-17.0898	-7.93457	-17.0898	-24.7192	-12.207	-8.54492	-13.7329	-14.6484	-17.0898	-17.395	-16.4795	-15.8691	-14.9536	-14.6484	-16.4795	-8.23975
-13.7329	-21.0571	-10.6812	-19.8364	-26.5503	-11.9019	-12.5122	-12.8174	-12.207	-15.564	-17.0898	-16.4795	-18.0054	-13.1226	-14.9536	-18.0054	-9.15527
-11.9019	-18.6157	-10.6812	-22.2778	-26.5503	-15.564	-10.9863	-13.4277	-12.207	-14.9536	-15.2588	-18.9209	-18.6157	-15.8691	-16.4795	-19.8364	-10.6812
-9.46045	-16.7847	-8.54492	-19.2261	-24.1089	-14.0381	-9.46045	-13.7329	-11.5967	-16.7847	-17.0898	-15.2588	-16.7847	-14.9536	-14.6484	-15.2588	-13.4277
-12.5122	-19.5312	-13.1226	-17.395	-23.4985	-10.0708	-9.46045	-15.8691	-11.5967	-16.4795	-17.395	-13.1226	-16.4795	-11.5967	-13.1226	-15.2588	-11.9019
-14.6484	-16.7847	-12.8174	-18.3105	-25.6348	-14.3433	-10.0708	-17.0898	-11.9019	-13.7329	-16.7847	-14.9536	-20.1416	-11.2915	-14.6484	-17.395	-11.5967
-16.4795	-15.2588	-12.8174	-17.0898	-25.9399	-15.564	-12.207	-16.1743	-13.7329	-15.2588	-15.8691	-15.8691	-22.2778	-11.9019	-14.9536	-16.1743	-13.4277
-18.3105	-18.0054	-13.7329	-15.8691	-28.0762	-11.2915	-13.1226	-16.4795	-13.7329	-15.2588	-17.0898	-14.3433	-21.0571	-11.2915	-13.4277	-13.7329	-11.5967
-19.2261	-16.7847	-9.46045	-18.0054	-31.4331	-13.1226	-13.7329	-15.564	-10.6812	-15.8691	-17.0898	-14.6484	-22.583	-10.9863	-15.2588	-14.9536	-11.9019
-17.0898	-14.0381	-9.15527	-14.6484	-29.602	-14.6484	-12.8174	-17.395	-13.1226	-16.1743	-17.0898	-17.0898	-21.3623	-12.207	-15.564	-15.564	-13.7329
-17.395	-16.1743	-11.2915	-14.3433	-29.2969	-12.5122	-13.7329	-18.3105	-13.7329	-21.0571	-19.8364	-16.7847	-20.1416	-10.376	-15.564	-15.8691	-13.7329
-16.4795	-18.0054	-13.1226	-17.0898	-33.5693	-14.6484	-15.8691	-18.0054	-11.9019	-21.9727	-18.9209	-17.7002	-19.8364	-10.376	-16.4795	-21.9727	-12.8174
-16.7847	-16.4795	-11.2915	-14.3433	-33.2642	-15.564	-15.564	-18.6157	-11.5967	-21.9727	-19.2261	-17.7002	-21.9727	-9.15527	-14.3433	-21.9727	-12.8174
-21.0571	-13.1226	0.30518	19.5312	35.0952	-7.32422	41.8091	47.6074	32.0435	93.9941	105.591	45.4712	64.6973	17.0898	-25.9399	-3.96729	124.207
-42.4194	5.49316	55.2368	116.577	179.749	143.738	287.781	332.336	327.454	495.3	549.316	473.938	520.935	478.516	321.655	401.001	705.261
-48.523	12.207	71.106	127.563	198.059	230.713	342.407	380.859	414.124	530.701	639.954	616.15	689.392	783.691	604.553	681.152	893.555
-41.5039	0.91553	41.8091	80.8716	134.277	187.988	240.479	251.16	287.17	355.53	451.965	434.57	522.766	621.033	528.259	588.379	691.528
-39.0625	-10.0708	18.0054	36.9263	65.918	115.356	130.92	143.127	158.386	208.74	265.198	241.089	322.266	378.113	343.018	403.748	455.322
-31.7383	-14.9536	8.54492	9.76563	24.1089	53.1006	56.1523	70.1904	72.6318	114.136	131.226	114.441	169.983	200.806	197.754	249.939	260.01
-25.0244	-21.0571	-2.13623	-2.44141	-4.57764	12.8174	10.376	19.5312	14.3433	42.7246	35.4004	31.1279	62.8662	71.4111	98.8769	128.784	115.662
-21.6675	-24.1089	-10.6812	-18.3105	-25.9399	-18.0054	-18.6157	-18.3105	-18.9209	-14.6484	-25.3296	-25.0244	-6.40869	-22.8882	23.8037	50.9644	29.602
-16.1743	-21.6675	-15.8691	-29.2969	-38.4522	-38.4522	-39.3677	-41.8091	-42.4194	-51.8799	-67.4438	-64.0869	-54.3213	-73.2422	-28.6865	-3.66211	-37.5366
-13.4277	-21.9727	-18.6157	-31.4331	-45.7764	-45.4712	-53.1006	-56.4575	-58.5938	-71.7163	-89.7217	-84.8389	-81.4819	-104.98	-52.4902	-41.8091	-81.4819
-12.8174	-25.3296	-22.2778	-36.6211	-48.523	-51.2695	-62.8662	-67.4438	-67.4438	-84.5337	-102.539	-95.52	-101.929	-125.122	-70.1904	-75.3784	-90.9424
-11.2915	-21.9727	-19.2261	-37.5366	-50.9644	-57.6782	-68.6646	-70.8008	-71.7163	-90.6372	-110.168	-101.318	-114.441	-134.583	-76.2939	-91.2476	-91.5527
-10.0708	-19.5312	-20.1416	-32.6538	-50.0488	-55.542	-70.1904	-74.7681	-73.2422	-93.9941	-111.084	-100.708	-108.643	-132.751	-72.937	-89.7217	-88.1958
-15.2588	-21.0571	-24.7192	-31.7383	-48.8281	-53.7109	-70.8008	-69.8852	-69.5801	-94.2993	-109.863	-99.1821	-105.896	-122.375	-71.4111	-82.0923	-74.4629
-13.4277	-17.395	-22.2778	-33.8745	-48.8281	-52.4902	-68.6646	-66.2231	-65.918	-88.8062	-100.708	-94.2993	-102.539	-107.727	-71.4111	-76.5991	-57.373
-13.1226	-13.7329	-20.752	-29.2969	-45.4712	-49.1333	-61.3403	-63.1714	-62.561	-83.9233	-93.689	-84.2285	-94.2993	-86.6699	-63.1714	-67.4438	-36.0107
-13.7329	-16.7847	-21.3623	-28.6865	-43.6401	-43.0298	-54.9316	-55.8472	-56.4575	-78.125	-88.1958	-73.8525	-85.144	-71.4111	-51.8799	-59.5093	-8.23975
-13.7329	-18.0054	-21.6675	-29.9072	-43.0298	-42.1143	-48.8281	-53.7109	-50.9644	-67.4438	-80.8716	-65.0024	-74.4629	-57.6782	-40.2832	-44.8608	14.6484
-13.4277	-18.0054	-17.7002	-24.7192	-36.0107	-39.0625	-45.7764	-46.3867	-49.4385	-60.4248	-71.106	-56.7627	-62.561	-45.7764	-25.3296	-21.9727	26.2451
-13.7329	-20.752	-19.8364	-23.8037	-32.0435	-31.4331	-40.8935	-44.8608	-43.0298	-55.542	-61.0352	-48.8281	-50.0488	-31.7383	-14.3433	1.2207	41.8091
-17.0898	-19.5312	-20.1416	-24.4141	-31.4331	-31.4331	-37.8418	-39.3677	-36.9263	-45.7764	-56.1523	-43.335	-42.4194	-20.4468	-2.74658	15.2588	53.7109
-14.6484	-17.0898	-15.8691	-20.4468	-25.9399	-29.9072	-35.7056	-35.7056	-34.4849	-39.978	-49.7437	-34.79	-30.5176	-14.3433	10.9863	35.7056	63.7817
-16.4795	-20.4468	-16.7847	-17.395	-21.0571	-24.1089	-30.5176	-30.5176	-28.9917	-36.9263	-43.9453	-27.4658	-21.3623	-1.83105	25.0244	58.2886	71.4111
-18.3105	-21.0571	-17.0898	-19.8364	-23.1934	-22.8882	-26.5503	-26.2451	-21.9727	-30.5176	-38.7573	-20.4468	-16.7847	8.23975	30.5176	68.6646	83.9233
-16.1743	-20.1416	-15.8691	-17.395	-18.9209	-21.9727	-21.6675	-25.3296	-20.752	-26.2451	-30.2124	-13.4277	-11.2915	19.2261	34.1797	71.7163	95.52
-14.9536	-20.1416	-15.8691	-15.2588	-16.7847	-15.564	-22.583	-21.0571	-19.5312	-24.1089	-24.4141	-10.6812	-5.49316	30.8227	41.1987	74.4629	111.694
-17.0898	-21.6675	-20.752	-16.7847	-19.8364	-14.0381	-20.4468	-17.0898	-15.564	-20.1416	-18.9209	-7.62939	-0.61035	37.5366	39.3677	74.7681	133.667
-15.8691	-18.6157	-18.9209	-15.564	-17.7002	-16.7847	-18.0054	-15.2588	-15.2588	-14.3433	-18.6157	-5.18799	-0.61035	45.7764	43.6401	74.7681	146.79
-15.8691	-18.3105	-18.0054	-12.207	-14.0381	-12.5122	-15.564	-13.7329	-15.2588	-12.5122	-10.9863	0.91553	7.32422	50.9644	51.8799	84.8389	155.945
-20.1416	-18.9209	-19.2261	-14.6484	-15.2588	-12.5122	-14.6484	-12.207	-8.54492	-12.8174	-7.93457	1.2207	10.9863	55.8472	58.2886	91.2476	162.048
-17.0898	-19.5312	-15.8691	-13.4277	-16.7847	-13.7329	-13.1226	-8.8501	-7.62939	-10.0708	-5.18799	1.2207	11.9019	55.8472	67.4438	91.5527	165.405
-15.8691	-20.1416	-16.7847	-8.54492	-11.2915	-12.207	-10.376	-8.23975	-8.8501	-8.54492	-2.74658	8.54492	15.2588	59.8145	72.937	93.3838	166.931
-18.9209	-19.2261	-18.6157	-8.8501	-14.3433	-10.6812	-11.9019	-7.01904	-4.57764	-7.01904	-0.61035	10.9863	18.9209	60.73	74.4629	91.5527	176.086
-19.8364	-18.0054	-16.1743	-9.15527	-13.7329	-10.9863	-8.54492	-7.01904	-4.88281	-4.27246	-2.13623	12.8174	19.5312	58.5938	77.2095	90.9424	180.054
-16.1743	-19.8364	-16.7847	-9.76563	-10.376	-9.15527	-9.76563	-6.40869	-3.66211	-3.66211	-0.30518	15.564	24.1089	62.561	83.0078	93.9941	177.917
-17.395	-21.3623	-19.5312	-9.15527	-9.46045	-7.62939	-7.01904	-4.88281	-1.2207	-3.05176	1.2207	18.3105	29.602	64.6973	80.2612	91.8579	180.359
-17.7002	-16.4795	-19.5312	-8.54492	-13.7329	-10.6812	-5.49316	-5.18799	-0.91553	-1.83105	3.35693	17.0898	30.5176	63.1714	75.0732	81.4819	181.58
-15.2588	-15.8691	-17.395	-5.79834	-10.6812	-7.01904	-5.49316	-6.40869	-2.13623	-0.61035	5.49316	18.0054	33.2642	61.0352	71.7163	79.3457	177.612
-16.4795	-20.752	-19.8364	-6.71387	-9.76563	-3.66211	-4.88281	-5.49316	-0.30518	0	6.71387	20.4468	35.0952	62.8662	68.6646	79.0405	176.392
-18.0054	-16.7847	-18.6157	-9.76563	-11.9019	-7.01904	-6.71387	-3.35693	0	2.13623	7.32422	17.395	31.4331	63.1714	64.0869	72.6318	173.95
-13.1226	-13.1226	-19.8364	-9.15527	-9.76563	-7.93457	-4.88281	-2.13623	-1.83105	-0.61035	7.32422	18.3105	31.4331	63.1714	61.6455	72.6318	169.983
-13.1226	-15.564	-19.8364	-8.23975	-9.76563	-5.49316	-5.49316	-1.2207	-0.30518	-0.91553	8.23975	19.5312	34.79	66.2231	60.1196	72.0215	177.307
-12.5122	-16.1743	-18.3105	-8.8501	-7.93457	-6.10352	-4.88281	-3.05176	2.13623	3.66211	7.01904	18.6157	34.4849	60.1196	59.2041	71.106	174.561
-9.46045	-11.2915	-14.6484	-7.93457	-8.23975	-8.8501	-5.18799	-2.74658	-1.2207	4.57764	6.40869	17.395	34.1797	58.8989	61.9507	67.1387	161.438
-11.5967	-13.4277	-16.1743	-8.8501	-8.8501	-5.79834	-4.27246	-1.52588	-0.30518	3.96729	6.10352	18.9209	35.0952	58.5938	58.2886	71.106	148.926
-14.0381	-14.6484	-18.6157	-9.46045	-11.9019	-7.62939	-5.18799	-0.91553	1.2207	2.13623	4.27246	19.5312	33.5693	58.2886	54.0161	70.1904	139.16
-10.6812	-13.4277	-15.2588	-8.54492	-9.76563	-8.23975	-3.66211	-0.91553	-1.2207	3.35693	5.18799	18.3105	35.0952	59.8145	57.0679	65.3076	134.277
-11.5967	-16.4795	-18.6157	-7.62939	-8.54492	-3.96729	-2.44141	-1.52588	0.91553	2.74658	7.32422	19.5312	37.8418	64.0869	60.73	65.3076	133.972
-15.564	-17.7002	-19.5312	-9.76563	-12.207	-4.27246	-4.27246	0	3.35693	3.35693	8.54492	17.7002	34.1797	64.0869	61.9507	59.8145	133.057
-13.4277	-16.7847	-17.0898	-9.46045	-11.5967	-7.32422	-3.05176	-1.2207	0	5.18799	7.93457	16.4795	31.7383	61.6455	61.6455	57.6782	130.615
-14.3433	-16.1743	-17.7002	-7.93457	-7.93457	-7.62939	-4.88281	-0.61035	-0.30518	2.13623	10.0708	18.9209	34.79	62.561	62.561	63.4766	140.686
-16.1743	-17.395	-19.8364	-11.2915	-7.32422	-7.32422	-5.49316	-0.61035	2.13623	5.18799	9.76563	21.3623	33.8745	62.561	64.0869	67.4438	157.471
-15.564	-12.8174	-16.4795	-10.9863	-8.23975	-9.15527	-3.66211	-1.2207	1.83105	6.40869	8.23975	20.752	32.959	62.2559	71.4111	65.6128	159.607
-13.4277	-11.5967	-17.0898	-7.93457	-6.40869	-6.10352	-4.27246	-1.52588	0.91553	4.57764	9.76563	22.8882	37.5366	64.0869	78.125	66.2231	158.081
-15.2588	-15.2588	-21.3623	-11.2915	-7.32422	-5.79834	-2.44141	-0.61035	3.05176	4.27246	9.15527	20.752	39.6728	61.9507	81.1768	62.2559	164.185
-14.6484	-12.8174	-18.0054	-12.8174	-11.5967	-7.93457	-3.05176	-1.2207	1.52588	3.96729	7.01904	18.9209	36.9263	59.5093	84.8389	56.7627	169.678
-10.9863	-11.5967	-18.3105	-11.9019	-8.23975	-6.40869	-2.74658	-1.2207	1.52588	3.66211	9.76563	21.6675	39.0625	61.6455	93.3838	52.1851	166.016
-15.2588	-13.4277	-22.2778	-12.8174	-10.0708	-2.74658	-5.79834	0.30518	4.88281	1.83105	12.207	19.8364	37.2315	61.3403	96.4356	48.8281	166.321
-13.7329	-9.46045	-18.9209	-14.9536	-10.9863	-5.49316	-3.96729	-0.91553	3.05176	3.66211	10.0708	18.3105	33.8745	55.8472	96.1304	45.4712	159.302
-9.46045	-7.93457	-16.1743	-10.6812	-9.76563	-6.40869	-1.52588	-3.66211	0.30518	0.30518	9.15527	18.0054	36.3159	53.7109	99.1821	42.1143	141.907
-11.9019	-10.6812	-20.1416	-12.8174	-8.23975	-3.96729	-3.05176	-2.74658	-0.61035	2.13623	10.0708	19.8364	41.8091	54.6265	103.149	42.4194	134.277
-13.7329	-10.9863	-18.6157	-14.9536	-9.46045	-9.15527	-4.88281	-1.83105	0	6.10352	10.0708	18.9209	39.3677	54.3213	105.286	44.5557	128.784
-12.207	-7.93457	-17.0898	-11.9019	-6.40869	-6.10352	-4.57764	-1.52588	-1.2207	4.88281	10.376	19.5312	40.8935	52.1851	108.032	46.9971	128.784
-13.1226	-9.15527	-20.4468	-10.376	-5.49316	-0.61035	-3.96729	-1.52588	1.2207	0.91553	10.9863	22.583	39.3677	54.0161	110.168	52.4902	136.108
-14.9536	-10.6812	-18.0054	-12.207	-10.376	-3.05176	-3.35693	-2.13623	4.57764	3.96729	10.0708	20.1416	35.7056	51.5747	110.779	55.8472	138.245
-13.4277	-8.8501	-16.1743	-11.2915	-6.71387	-6.10352	-3.66211	-2.13623	0.61035	6.40869	9.46045	21.6675	38.147	50.354	107.422	60.4248	137.939
-15.564	-11.2915	-18.0054	-11.2915	-8.54492	-6.71387	-6.40869	-0.91553	1.52588	4.27246	10.376	24.7192	41.1987	50.6592	105.896	67.1387	148.01
-17.7002	-10.6812	-18.0054	-15.2588	-10.0708	-7.93457	-6.71387	-0.30518	1.83105	4.88281	8.8501	22.583	39.6728	49.1333	106.506	67.4438	159.302
-14.9536	-8.8501	-14.9536	-14.3433	-7.93457	-7.93457	-4.88281	-1.52588	1.52588	5.18799	8.8501	21.9727	41.5039	49.1333	104.065	67.4438	160.217
-14.0381	-11.2915	-15.564	-12.5122	-4.88281	-5.79834	-3.05176	-0.91553	1.2207	3.66211	10.376	23.1934	47.3023	50.9644	101.929	74.4629	161.438
-14.6484	-12.5122	-15.564	-15.8691	-7.93457	-7.32422	-2.74658	0.61035	3.96729	5.18799	7.93457	19.8364	46.9971	54.6265	97.6562	78.125	159.912
-10.376	-10.9863	-12.8174	-14.9536	-8.54492	-8.54492	-5.49316	-2.44141	1.52588	5.79834	6.10352	18.0054	44.5557	57.9834	96.1304	77.5147	153.198
-8.8501	-10.6812	-13.1226	-13.4277	-8.23975	-6.71387	-3.96729	-2.13623	-1.83105	3.96729	9.46045	21.0571	46.0815	62.2559	90.332	79.3457	150.757
-13.7329	-12.207	-14.0381	-15.8691	-10.376	-7.32422	-3.96729	-2.13623	0.61035	3.05176	10.0708	21.3623	39.3677	60.73	86.0596	83.313	153.809
-13.4277	-9.76563	-14.0381	-14.3433	-8.54492	-8.23975	-2.74658	0	-0.61035	4.27246	7.62939	20.752	36.0107	56.4575	87.5854	83.6182	152.588
-10.0708	-11.5967	-14.0381	-12.207	-8.23975	-6.71387	-4.27246	0.30518	-0.30518	3.96729	10.376	21.6675	37.8418	59.5093	90.6372	80.8716	144.043
-13.1226	-15.564	-15.564	-16.4795	-7.93457	-5.79834	-5.49316	0.61035	2.74658	4.27246	11.9019	19.8364	36.6211	60.73	88.8062	78.7353	141.296
-13.1226	-13.4277	-11.9019	-16.1743	-8.54492	-7.93457	-6.10352	-0.91553	2.44141	4.57764	7.32422	19.5312	31.7383	61.3403	84.2285	72.3267	136.108
-8.8501	-11.5967	-11.5967	-13.1226	-6.40869	-3.05176	-3.96729	-0.61035	1.83105	2.74658	9.46045	21.0571	35.4004	67.749	83.0078	72.3267	136.719
-10.6812	-12.8174	-15.564	-14.6484	-7.62939	-4.88281	-3.05176	-1.83105	2.13623	3.35693	10.6812	22.2778	36.6211	71.4111	82.0923	74.7681	153.198
-10.376	-10.9863	-12.5122	-14.9536	-10.6812	-7.32422	-4.57764	-2.44141	0.91553	5.79834	9.15527	19.2261	34.79	73.2422	80.8716	78.125	160.522
-6.71387	-11.5967	-10.6812	-12.207	-6.40869	-8.23975	-4.57764	-0.30518	-1.2207	6.10352	10.376	20.752	38.147	73.2422	79.3457	80.5664	165.71
-11.9019	-14.3433	-11.9019	-10.9863	-7.01904	-9.46045	-3.35693	0.30518	0.91553	5.18799	10.376	22.583	38.4522	76.9043	79.6509	86.0596	167.542
-12.207	-10.9863	-12.5122	-15.2588	-7.01904	-10.0708	-3.05176	-2.13623	-0.30518	5.18799	8.54492	18.6157	34.1797	78.125	78.125	86.3648	165.405
-9.76563	-9.76563	-12.207	-12.5122	-3.66211	-6.40869	-1.83105	-1.52588	0.61035	4.57764	9.15527	17.7002	34.4849	81.1768	77.2095	88.8062	154.114
-8.54492	-11.5967	-11.9019	-12.5122	-6.40869	-2.13623	-3.35693	0.30518	2.74658	3.66211	11.9019	19.8364	38.7573	85.144	78.125	97.9614	150.757
-9.46045	-10.0708	-13.7329	-14.9536	-9.15527	-4.57764	-3.35693	-0.91553	4.27246	4.88281	9.15527	17.7002	40.2832	85.144	79.0405	104.37	154.114
-7.32422	-7.62939	-10.0708	-13.7329	-4.88281	-5.18799	-4.88281	-2.44141	0	6.10352	9.46045	19.2261	40.8935	84.5337	79.6509	103.455	159.912
-7.32422	-10.376	-11.5967	-13.1226	-4.57764	-5.79834	-5.49316	-0.30518	1.83105	3.35693	11.2915	20.4468	42.4194	87.5854	80.2612	104.37	166.016
-10.9863	-10.376	-11.9019	-12.8174	-8.54492	-8.8501	-4.88281	1.52588	5.49316	3.66211	8.54492	17.0898	41.5039	86.9751	86.3648	102.539	171.814
-7.32422	-6.10352	-8.54492	-11.5967	-7.32422	-7.32422	-1.52588	-1.2207	1.52588	5.18799	8.54492	19.2261	41.8091	83.9233	91.5527	95.2148	178.833
-6.40869	-7.62939	-9.15527	-10.0708	-8.23975	-4.27246	-1.83105	0.30518	1.52588	3.96729	11.9019	21.6675	39.6728	87.2803	94.9097	100.098	187.988
-9.46045	-9.15527	-8.8501	-13.7329	-8.54492	-6.10352	-3.35693	0.91553	3.96729	4.88281	10.376	19.2261	36.3159	86.3648	97.6562	107.117	196.533
-7.93457	-7.93457	-8.23975	-12.207	-6.40869	-6.71387	-4.57764	0.61035	2.44141	5.79834	9.46045	19.2261	35.0952	82.7026	99.1821	106.812	201.416
-7.32422	-8.54492	-8.8501	-11.5967	-4.88281	-3.66211	-5.49316	0.30518	0.61035	4.88281	10.376	21.0571	37.8418	83.6182	100.098	112.915	205.688
-9.76563	-10.6812	-9.46045	-13.7329	-9.15527	-3.96729	-3.96729	0.61035	3.05176	5.18799	11.9019	21.3623	36.0107	86.0596	102.234	121.765	207.214
-11.2915	-8.54492	-7.01904	-11.9019	-8.23975	-5.79834	-0.91553	-0.30518	0.30518	6.71387	9.76563	20.1416	34.79	88.8062	102.844	129.089	206.909
-7.93457	-9.46045	-7.62939	-9.76563	-5.49316	-4.27246	-2.13623	-1.83105	0.30518	5.79834	11.9019	22.583	37.8418	88.501	101.624	136.108	204.163
-11.9019	-11.9019	-10.9863	-12.207	-8.54492	-5.18799	-4.88281	-1.83105	3.05176	4.57764	10.376	21.3623	34.1797	86.6699	101.929	137.329	204.163
-13.4277	-10.9863	-9.46045	-12.8174	-7.01904	-6.10352	-4.27246	-2.13623	2.74658	6.71387	9.76563	20.1416	32.3486	81.1768	101.318	126.648	206.299
-11.2915	-12.8174	-7.62939	-7.93457	-3.66211	-5.49316	-0.91553	-2.44141	-0.61035	4.27246	11.9019	20.4468	36.0107	74.7681	104.065	119.324	200.5
-15.2588	-17.395	-9.15527	-13.1226	-6.71387	-5.79834	-2.74658	-0.91553	1.83105	4.88281	12.5122	18.6157	36.6211	66.2231	109.253	116.882	197.754
-18.3105	-13.1226	-8.8501	-14.3433	-8.54492	-9.76563	-3.05176	-0.30518	3.66211	7.62939	10.9863	17.7002	36.0107	61.9507	111.694	108.337	201.721
-15.8691	-15.8691	-5.49316	-12.207	-8.23975	-7.32422	-3.35693	-2.44141	1.83105	6.10352	10.6812	19.8364	37.8418	59.5093	111.694	102.844	205.078
-16.4795	-20.752	-7.93457	-11.2915	-11.2915	-5.49316	-3.66211	-1.2207	1.52588	3.35693	13.1226	19.8364	38.147	57.373	115.051	103.76	212.097
-17.7002	-17.7002	-7.93457	-10.6812	-11.2915	-7.62939	-4.27246	-0.30518	3.96729	6.10352	12.5122	15.564	37.8418	57.6782	116.272	101.624	218.811
-16.7847	-14.3433	-6.40869	-10.376	-7.93457	-6.71387	-2.13623	-0.30518	1.83105	6.40869	14.6484	14.6484	42.1143	56.1523	111.084	102.234	203.552
-18.3105	-17.0898	-9.76563	-9.76563	-7.01904	-5.18799	-3.66211	-2.13623	1.2207	5.18799	15.2588	14.3433	39.3677	58.8989	108.337	104.675	191.65
-20.4468	-17.7002	-9.15527	-13.7329	-8.54492	-5.49316	-4.27246	-2.13623	1.83105	5.79834	12.8174	14.0381	36.6211	61.6455	107.422	108.337	182.19
-14.6484	-16.4795	-8.23975	-12.5122	-5.18799	-6.10352	-1.83105	-0.61035	1.2207	6.71387	12.5122	14.6484	39.978	64.0869	104.065	112.61	183.411
-12.207	-17.7002	-9.15527	-10.376	-7.62939	-3.96729	-3.05176	-0.61035	1.2207	4.88281	13.7329	15.8691	41.8091	65.6128	97.0459	117.188	185.852
-11.5967	-16.7847	-10.6812	-10.0708	-8.23975	-7.01904	-3.96729	-0.61035	1.2207	6.40869	12.8174	14.3433	40.2832	60.4248	93.3838	115.967	186.462
-7.01904	-14.0381	-8.54492	-8.54492	-7.93457	-7.32422	-4.27246	-2.44141	-0.61035	6.71387	12.207	15.2588	42.7246	59.5093	93.3838	114.136	180.969
-4.27246	-17.395	-8.23975	-7.93457	-9.15527	-5.18799	-4.27246	0	0.30518	4.27246	14.0381	18.6157	46.6919	60.73	92.1631	122.681	177.002
-6.40869	-18.3105	-11.2915	-10.376	-9.76563	-6.71387	-3.96729	0.91553	2.13623	4.27246	11.2915	14.0381	42.7246	57.9834	91.8579	133.057	180.359
-7.62939	-13.7329	-10.6812	-10.376	-6.10352	-8.23975	-4.57764	0	-1.2207	5.79834	13.4277	12.5122	41.8091	56.4575	91.8579	138.855	180.664
-4.88281	-13.7329	-15.2588	-7.01904	-4.57764	-6.40869	-3.96729	-0.30518	-1.52588	3.96729	15.2588	15.564	44.5557	56.7627	89.1113	148.926	184.326
-7.32422	-17.0898	-14.6484	-11.2915	-8.8501	-7.93457	-5.18799	-1.52588	-0.61035	3.66211	12.8174	13.7329	39.0625	58.2886	83.313	155.64	195.923
-8.8501	-15.564	-12.5122	-8.8501	-7.62939	-8.54492	-3.35693	-1.2207	0.30518	7.32422	12.207	13.7329	37.8418	59.2041	75.6836	155.64	206.299
-6.10352	-15.2588	-10.376	-7.93457	-7.32422	-6.71387	-4.27246	-2.74658	-0.30518	1.52588	12.8174	14.0381	40.2832	61.9507	70.8008	157.471	213.013
-10.376	-15.8691	-13.1226	-13.7329	-9.15527	-5.18799	-4.57764	-0.61035	3.96729	4.57764	12.5122	14.3433	39.978	61.3403	67.4438	164.49	220.337
-10.9863	-12.5122	-14.6484	-12.8174	-10.0708	-7.62939	-3.66211	-1.83105	2.13623	6.40869	9.46045	13.7329	38.4522	60.73	64.6973	165.71	222.778
-9.46045	-10.9863	-14.0381	-10.0708	-7.62939	-6.71387	-2.44141	-2.44141	1.52588	4.27246	12.207	16.4795	42.7246	59.5093	68.3594	167.847	225.525
-12.207	-11.2915	-14.6484	-10.9863	-9.46045	-5.49316	-3.05176	-0.61035	2.13623	3.05176	11.2915	14.0381	42.1143	59.2041	73.2422	172.729	224.304
-11.5967	-10.0708	-13.7329	-12.8174	-7.32422	-7.62939	-4.27246	-2.44141	0.30518	5.49316	10.0708	11.5967	40.5884	55.8472	80.2612	170.898	218.811
-8.8501	-9.76563	-14.3433	-10.0708	-7.01904	-7.01904	-3.35693	-1.83105	1.2207	4.88281	11.9019	13.7329	42.4194	55.2368	85.4492	166.016	215.149
-9.46045	-13.7329	-14.6484	-11.2915	-10.0708	-5.49316	-5.49316	-1.2207	2.44141	3.05176	10.376	13.7329	42.1143	57.373	91.5527	167.847	212.097
-12.5122	-13.1226	-14.6484	-12.5122	-7.01904	-6.71387	-4.57764	-0.61035	1.52588	6.40869	8.23975	10.9863	41.5039	61.3403	94.2993	165.71	210.571
-10.376	-11.2915	-13.1226	-9.76563	-4.27246	-6.10352	-3.96729	-0.61035	0	3.96729	9.46045	15.564	41.5039	65.0024	99.1821	163.879	208.74
-12.207	-13.4277	-10.6812	-11.2915	-6.40869	-3.96729	-4.57764	-0.30518	3.66211	2.44141	10.9863	17.0898	42.4194	61.9507	100.098	164.795	206.604
-13.1226	-14.0381	-11.5967	-14.6484	-7.93457	-7.01904	-4.27246	-2.74658	2.44141	4.88281	7.93457	14.6484	38.7573	60.1196	103.149	165.71	199.585
-10.0708	-13.4277	-12.8174	-12.5122	-5.18799	-6.40869	-0.61035	-3.66211	-0.30518	6.10352	10.9863	15.564	39.978	60.4248	104.98	168.457	184.631
-8.8501	-14.9536	-13.1226	-9.15527	-5.79834	-6.10352	-1.2207	0.91553	1.83105	4.88281	11.2915	16.1743	39.6728	60.1196	107.422	174.561	174.561
-12.207	-16.7847	-12.5122	-11.5967	-8.54492	-7.62939	-3.05176	0	1.83105	5.18799	9.46045	14.6484	36.9263	58.8989	112.305	178.223	171.814
-11.2915	-16.1743	-14.3433	-10.376	-6.10352	-10.376	-1.2207	0	-1.83105	4.57764	10.6812	15.2588	39.6728	58.2886	113.22	174.866	168.152
-7.62939	-17.0898	-13.4277	-7.62939	-8.23975	-7.01904	-3.66211	-0.91553	0.30518	2.74658	9.76563	17.7002	39.978	62.2559	116.272	180.359	168.152
-9.76563	-15.564	-12.8174	-12.207	-9.46045	-6.40869	-4.88281	-1.2207	2.44141	4.88281	6.10352	17.395	37.8418	61.9507	112.61	184.937	174.255
-10.376	-13.7329	-13.4277	-10.9863	-9.15527	-5.49316	-3.96729	-1.2207	0.61035	4.57764	7.62939	17.7002	38.147	64.3921	109.253	184.937	183.411
-9.15527	-14.3433	-14.9536	-8.23975	-8.54492	-3.96729	-3.66211	-2.13623	0.30518	2.74658	8.54492	19.8364	42.7246	62.8662	110.168	180.969	195.923
-10.376	-15.2588	-15.8691	-10.376	-10.6812	-4.88281	-4.27246	-0.61035	2.44141	6.10352	6.10352	18.9209	38.7573	60.4248	110.168	177.917	205.688
-11.9019	-17.395	-14.6484	-10.376	-6.71387	-8.54492	-3.35693	-1.83105	0.91553	5.79834	8.23975	18.3105	40.8935	59.5093	105.896	174.561	207.214
-9.46045	-19.5312	-14.0381	-9.46045	-6.71387	-7.32422	-3.05176	-2.13623	-0.30518	3.66211	10.0708	19.2261	43.0298	56.4575	101.624	173.645	203.247
-14.3433	-22.2778	-14.0381	-9.15527	-10.9863	-6.10352	-3.66211	-0.61035	1.83105	4.27246	9.15527	17.7002	42.1143	54.0161	105.286	173.95	201.721
-15.8691	-22.583	-10.0708	-10.0708	-8.23975	-8.8501	-2.44141	1.52588	0.61035	5.49316	9.46045	18.0054	41.5039	51.8799	106.812	171.509	195.923
-13.1226	-22.583	-8.8501	-9.15527	-7.01904	-6.71387	-3.66211	-0.91553	-1.52588	3.05176	10.9863	18.9209	43.335	52.1851	106.201	175.781	190.735
-14.3433	-22.2778	-11.5967	-12.207	-7.62939	-4.57764	-3.96729	0.61035	1.52588	5.79834	10.376	17.395	43.9453	52.4902	107.727	181.274	188.904
-14.9536	-20.752	-11.5967	-11.2915	-8.54492	-6.71387	-3.66211	-1.2207	2.74658	5.79834	8.23975	16.1743	40.5884	57.6782	104.065	177.917	187.378
-14.0381	-20.752	-9.76563	-10.0708	-4.57764	-6.40869	-2.74658	-3.66211	0.91553	3.05176	10.9863	18.3105	40.2832	60.1196	101.013	174.255	186.157
-14.6484	-22.8882	-10.9863	-9.15527	-6.71387	-5.79834	-3.96729	0.30518	3.35693	3.05176	10.6812	17.395	38.147	61.0352	101.624	174.561	186.462
-13.7329	-21.6675	-12.207	-11.2915	-7.01904	-7.01904	-5.49316	0	3.05176	5.18799	8.8501	16.4795	36.9263	60.4248	101.624	165.405	187.988
-7.62939	-18.9209	-9.76563	-8.8501	-7.01904	-6.40869	-3.05176	0.30518	0.91553	3.66211	9.15527	16.1743	40.2832	59.5093	98.5718	151.672	187.073
-10.0708	-19.2261	-8.8501	-12.207	-10.376	-5.49316	-3.35693	-1.2207	1.2207	4.27246	10.376	14.9536	38.7573	57.9834	98.8769	150.757	197.449
-13.1226	-19.5312	-10.6812	-13.1226	-8.54492	-7.93457	-2.44141	-3.05176	1.2207	9.76563	8.54492	13.1226	34.1797	57.9834	96.1304	153.198	213.623
-10.0708	-18.6157	-12.207	-10.6812	-6.71387	-8.54492	-2.13623	-1.83105	0.61035	5.18799	11.2915	16.4795	33.5693	58.2886	91.2476	155.945	215.454
-10.0708	-17.0898	-12.5122	-11.2915	-8.54492	-6.71387	-3.05176	-0.91553	3.05176	3.05176	12.207	17.7002	36.6211	60.4248	88.8062	155.945	215.454
-11.5967	-13.1226	-14.0381	-13.1226	-11.5967	-7.62939	-3.35693	-0.61035	3.66211	5.49316	8.8501	15.2588	35.7056	59.5093	87.5854	150.757	211.792
-13.7329	-11.5967	-13.7329	-11.9019	-7.62939	-9.76563	-3.35693	-1.2207	2.13623	3.96729	11.2915	16.7847	38.4522	62.2559	85.7544	144.653	206.909
-13.1226	-13.1226	-12.5122	-11.5967	-6.71387	-5.79834	-3.66211	-0.61035	3.96729	3.96729	12.207	19.8364	39.6728	68.6646	85.144	143.738	207.52
-14.9536	-12.207	-11.2915	-13.1226	-10.376	-6.40869	-3.35693	-1.52588	2.74658	6.40869	7.93457	17.7002	36.6211	72.0215	84.2285	144.348	212.097
-12.8174	-11.2915	-11.5967	-11.9019	-8.8501	-7.01904	-2.13623	-3.05176	0	5.18799	10.6812	18.9209	39.978	71.7163	78.7353	141.907	215.149
-10.6812	-13.7329	-11.9019	-11.2915	-10.376	-5.18799	-6.40869	-1.52588	0	1.52588	12.5122	21.0571	40.8935	71.4111	76.9043	147.705	213.318
-13.1226	-14.0381	-12.5122	-14.6484	-10.376	-6.40869	-6.71387	-2.13623	1.83105	4.57764	10.9863	20.752	37.5366	70.4956	79.6509	152.893	206.299
-11.9019	-9.76563	-13.7329	-14.3433	-9.15527	-7.32422	-4.57764	-0.91553	-1.52588	6.10352	9.46045	19.5312	37.2315	71.106	75.9888	154.114	195.007
-10.6812	-9.46045	-13.4277	-11.5967	-8.23975	-7.01904	-3.66211	-0.61035	-1.52588	4.88281	10.9863	20.4468	42.1143	69.2749	73.5474	152.588	193.481
-11.9019	-11.9019	-13.7329	-13.1226	-11.5967	-6.40869	-3.05176	0	0.30518	6.10352	8.54492	16.7847	42.7246	67.4438	72.6318	152.283	198.059
-12.5122	-11.5967	-14.3433	-11.9019	-10.0708	-8.8501	-1.52588	-0.91553	-3.05176	5.18799	8.54492	14.6484	42.7246	67.749	72.6318	142.212	198.975
-9.15527	-11.5967	-14.9536	-8.54492	-7.93457	-7.32422	-1.83105	-1.83105	-0.61035	2.74658	12.207	18.3105	44.2505	68.0542	73.2422	131.531	198.059
-10.376	-13.7329	-14.9536	-10.9863	-11.5967	-5.49316	-3.96729	-2.44141	2.74658	4.88281	9.15527	17.7002	39.978	68.6646	80.8716	122.986	205.078
-11.2915	-12.207	-12.5122	-14.9536	-8.8501	-10.376	-2.44141	-1.83105	-0.30518	7.32422	9.46045	17.7002	36.9263	72.6318	83.313	113.525	210.876
-10.376	-12.8174	-12.5122	-14.0381	-5.79834	-7.62939	-5.18799	-1.52588	0	3.05176	11.9019	20.1416	39.0625	75.0732	85.4492	109.253	208.13
-13.1226	-16.7847	-15.2588	-15.564	-9.76563	-5.49316	-5.18799	-1.52588	3.66211	3.96729	9.15527	20.752	37.2315	80.8716	96.7407	104.37	208.435
-13.7329	-16.7847	-17.395	-16.1743	-12.8174	-9.46045	-3.35693	-2.13623	1.2207	4.88281	7.93457	15.8691	33.8745	82.3975	100.403	106.812	211.487
-11.5967	-15.8691	-14.6484	-15.8691	-10.376	-10.0708	-3.66211	-4.57764	0.30518	4.88281	10.6812	16.4795	35.4004	83.0078	102.539	113.525	208.74
-9.15527	-14.9536	-12.5122	-17.0898	-8.54492	-6.40869	-3.66211	-2.13623	2.13623	5.79834	8.54492	16.1743	34.1797	80.8716	109.863	118.408	211.487
-9.15527	-12.8174	-10.9863	-17.0898	-9.15527	-8.23975	-4.27246	-1.83105	1.83105	5.18799	7.01904	13.4277	30.5176	76.5991	114.136	118.713	217.285
-9.15527	-14.0381	-10.9863	-12.8174	-7.93457	-8.8501	-3.96729	-0.91553	0.61035	4.27246	11.2915	15.2588	35.7056	74.7681	110.779	120.239	214.539
-8.8501	-15.8691	-13.4277	-14.3433	-9.76563	-7.01904	-5.49316	0.61035	1.2207	2.74658	11.5967	17.395	37.2315	72.3267	110.474	123.596	205.078
-13.1226	-15.8691	-14.0381	-15.564	-9.76563	-8.8501	-6.40869	-0.61035	1.2207	5.79834	8.23975	17.0898	34.79	67.749	116.272	121.765	200.806
-9.46045	-15.2588	-14.6484	-12.5122	-6.10352	-10.0708	-4.27246	-2.13623	0.91553	5.18799	9.76563	16.4795	38.4522	61.6455	117.493	125.732	191.956
-7.93457	-16.7847	-15.2588	-12.8174	-7.62939	-7.32422	-2.74658	-4.57764	0	2.44141	9.76563	16.7847	42.7246	60.73	120.85	130.31	192.566
-9.46045	-17.395	-15.564	-14.3433	-9.46045	-5.18799	-3.35693	-2.13623	0	6.10352	7.01904	15.564	39.978	56.1523	126.648	136.414	193.787
-8.8501	-17.395	-14.3433	-12.8174	-7.01904	-7.93457	-4.27246	-0.61035	1.83105	5.49316	10.6812	15.2588	41.1987	50.9644	130.92	140.991	188.599
-7.32422	-16.7847	-13.4277	-12.5122	-7.32422	-7.01904	-3.96729	-0.30518	2.44141	2.74658	12.5122	17.395	42.4194	49.4385	134.277	147.705	191.04
-10.376	-17.395	-13.7329	-16.7847	-9.76563	-6.40869	-4.27246	-1.83105	2.13623	2.13623	10.0708	14.9536	39.3677	51.5747	134.583	148.621	188.599
-10.376	-16.1743	-10.0708	-13.1226	-7.01904	-9.76563	-3.05176	-2.13623	-0.61035	3.66211	12.207	16.7847	38.147	52.7954	132.751	141.296	176.086
-7.32422	-14.9536	-10.6812	-11.9019	-7.01904	-7.93457	-3.66211	-0.91553	1.2207	2.44141	13.1226	18.3105	38.147	50.9644	133.667	140.991	163.879
-10.376	-15.8691	-9.76563	-13.7329	-10.376	-7.01904	-4.88281	-3.66211	2.44141	6.10352	8.54492	18.0054	37.5366	49.7437	133.667	140.381	159.912
-8.8501	-15.8691	-11.2915	-14.9536	-9.46045	-8.54492	-4.27246	-3.66211	1.2207	6.40869	9.76563	14.6484	36.3159	47.6074	130.31	135.803	155.334
-6.10352	-15.2588	-11.5967	-11.5967	-7.01904	-6.71387	-4.88281	-3.05176	1.2207	2.13623	11.5967	18.3105	38.147	44.8608	129.395	133.667	152.283
-8.8501	-13.7329	-12.207	-10.9863	-7.62939	-4.27246	-5.18799	-2.44141	1.52588	4.57764	8.8501	20.1416	37.8418	43.6401	132.751	130.31	155.029
-10.0708	-11.9019	-10.376	-11.9019	-5.49316	-7.62939	-2.44141	-3.35693	0.61035	5.79834	7.62939	17.0898	38.147	43.335	133.057	123.596	153.503
-9.46045	-16.1743	-9.46045	-10.0708	-3.35693	-7.62939	-0.91553	-0.61035	-0.30518	4.27246	8.8501	21.3623	41.5039	45.166	129.089	120.544	145.264
-7.93457	-17.395	-9.15527	-11.9019	-6.10352	-5.79834	-5.18799	0.61035	1.52588	4.57764	11.5967	20.752	41.1987	50.9644	126.953	122.681	141.907
-8.8501	-15.564	-9.46045	-12.5122	-4.57764	-8.8501	-5.79834	-1.52588	0.61035	5.18799	8.8501	19.8364	41.8091	49.7437	123.291	126.343	136.719
-7.32422	-12.8174	-9.76563	-11.2915	-2.74658	-6.71387	-3.05176	-2.13623	0.61035	2.44141	10.376	20.752	43.6401	48.2178	126.343	131.836	128.479
-8.23975	-11.9019	-11.5967	-12.8174	-6.10352	-5.79834	-4.27246	-1.52588	3.35693	3.66211	11.5967	23.8037	44.5557	48.523	135.498	135.803	136.719
-10.0708	-11.9019	-12.8174	-14.6484	-7.93457	-6.71387	-4.27246	-1.2207	1.83105	5.49316	12.207	19.5312	42.7246	47.9126	139.16	130.615	152.893
-7.32422	-9.46045	-10.376	-12.8174	-7.01904	-8.23975	-3.66211	-0.61035	-0.91553	4.88281	13.4277	20.4468	47.6074	43.6401	139.771	123.291	162.659
-6.10352	-7.32422	-11.2915	-11.9019	-9.76563	-6.40869	-3.35693	-1.83105	1.2207	3.35693	13.4277	23.4985	48.2178	42.7246	143.127	126.648	169.983
-7.62939	-8.8501	-12.207	-15.2588	-10.0708	-7.01904	-3.05176	-1.52588	1.83105	6.10352	8.8501	19.2261	42.4194	44.2505	140.686	128.784	171.204
-9.15527	-9.46045	-10.0708	-12.207	-7.01904	-7.01904	-2.13623	0	-1.52588	4.88281	9.46045	20.752	42.7246	44.2505	139.465	124.817	162.048
-13.1226	-9.15527	-8.23975	-12.5122	-9.76563	-4.88281	-4.27246	1.2207	2.74658	2.13623	9.46045	22.2778	42.1143	45.7764	139.465	122.375	157.166
-18.6157	-11.5967	-6.40869	-15.564	-9.46045	-5.49316	-7.32422	-0.30518	3.05176	5.49316	8.23975	19.5312	37.5366	48.8281	140.076	119.019	165.71
-21.6675	-10.0708	-10.0708	-13.7329	-5.18799	-7.93457	-5.49316	1.2207	1.2207	5.79834	11.2915	21.0571	35.0952	51.5747	138.245	118.408	173.34
-21.9727	-8.23975	-11.5967	-12.5122	-7.93457	-6.40869	-5.49316	0.30518	3.66211	3.96729	10.9863	24.4141	35.0952	56.7627	143.127	119.934	180.054
-25.9399	-10.9863	-10.376	-14.6484	-9.46045	-7.62939	-3.35693	-1.83105	3.66211	6.10352	8.8501	21.9727	32.6538	62.8662	148.315	118.408	185.547
-27.1606	-10.9863	-10.376	-15.2588	-5.49316	-8.54492	-3.66211	-2.74658	0.91553	4.57764	10.9863	21.0571	32.0435	65.0024	144.958	112.61	185.547
-25.0244	-12.5122	-11.9019	-13.4277	-6.40869	-5.49316	-4.57764	-2.44141	-0.91553	4.88281	13.4277	25.3296	35.4004	64.0869	143.433	112.305	181.58
-24.7192	-11.9019	-12.207	-15.8691	-10.0708	-4.57764	-3.96729	-2.74658	3.05176	6.71387	10.376	21.6675	33.5693	65.918	145.874	110.779	174.866
-25.3296	-14.0381	-10.9863	-13.7329	-7.32422	-8.8501	-3.05176	-2.74658	-0.61035	5.79834	10.6812	20.1416	32.6538	66.2231	145.569	108.032	169.067
-23.1934	-15.564	-11.5967	-11.2915	-6.71387	-7.62939	-3.05176	-0.91553	0	3.35693	12.8174	21.9727	32.0435	66.2231	141.296	110.168	169.983
-23.4985	-15.564	-13.1226	-14.0381	-8.23975	-7.01904	-5.79834	-2.13623	1.52588	4.88281	9.15527	21.0571	31.7383	66.2231	141.907	117.188	182.495
-22.2778	-16.1743	-14.9536	-14.0381	-7.93457	-8.8501	-3.96729	-0.61035	1.2207	4.88281	9.76563	17.7002	32.3486	69.2749	140.381	123.901	195.923
-20.4468	-17.0898	-13.7329	-10.0708	-6.71387	-8.54492	-3.66211	-0.30518	2.74658	1.52588	11.5967	19.5312	34.4849	69.2749	138.55	131.836	203.247
-22.8882	-17.395	-12.8174	-11.5967	-8.23975	-4.27246	-3.66211	-0.61035	4.27246	2.74658	10.9863	17.7002	32.6538	69.2749	135.498	140.381	213.318
-21.9727	-17.395	-12.8174	-14.3433	-8.54492	-9.15527	-4.27246	-1.2207	1.52588	6.40869	9.76563	16.4795	29.9072	68.3594	133.972	140.991	220.947
-22.2778	-16.4795	-12.8174	-13.1226	-6.40869	-8.8501	-4.57764	-1.2207	-0.30518	4.27246	11.9019	19.8364	32.6538	67.749	134.888	138.245	223.389
-22.8882	-16.4795	-16.1743	-15.2588	-8.54492	-5.49316	-5.49316	-0.61035	1.83105	4.27246	10.6812	18.0054	34.1797	64.6973	140.381	139.465	229.187
-23.8037	-15.564	-15.564	-15.564	-7.62939	-7.93457	-6.40869	-1.2207	0.30518	5.18799	9.46045	15.564	35.0952	65.0024	148.926	133.362	234.07
-24.1089	-13.7329	-17.395	-13.1226	-7.93457	-9.76563	-4.27246	-3.05176	0.30518	0.91553	11.2915	18.3105	40.2832	68.9697	151.062	126.343	228.577
-24.4141	-13.7329	-18.6157	-13.7329	-8.23975	-6.10352	-6.40869	-1.2207	1.52588	1.2207	10.6812	21.3623	40.8935	69.2749	153.503	125.427	223.999
-25.6348	-14.3433	-15.564	-16.1743	-7.32422	-4.88281	-3.96729	-0.30518	0.30518	3.35693	10.0708	17.395	37.5366	71.106	151.672	122.681	218.811
-24.7192	-14.6484	-15.564	-12.8174	-7.01904	-7.32422	-3.96729	-0.30518	-0.61035	0.91553	10.9863	18.6157	37.5366	69.8852	147.705	120.85	210.571
-25.9399	-14.6484	-17.0898	-12.8174	-9.46045	-4.88281	-5.18799	-1.83105	1.83105	0	10.9863	21.6675	37.8418	67.4438	148.01	124.207	203.247
-27.771	-16.1743	-17.0898	-16.1743	-10.9863	-6.40869	-4.88281	-1.2207	2.13623	5.49316	7.93457	18.6157	32.959	65.918	148.01	130.31	195.007
-28.6865	-18.6157	-15.564	-13.1226	-8.8501	-10.6812	-1.52588	-1.2207	0.61035	4.88281	10.0708	19.5312	29.9072	63.7817	143.127	137.024	188.599
-27.1606	-20.1416	-16.1743	-12.5122	-11.5967	-7.93457	-2.44141	-3.96729	2.13623	3.35693	10.9863	21.6675	28.9917	64.3921	144.043	146.484	179.749
-29.2969	-21.3623	-15.2588	-15.2588	-10.9863	-7.62939	-3.05176	-0.91553	0.91553	5.49316	8.54492	20.1416	25.6348	67.749	145.874	155.029	176.086
-30.8227	-22.8882	-16.1743	-14.3433	-7.62939	-11.2915	-2.74658	0.30518	-3.05176	3.66211	9.46045	21.6675	26.8555	69.5801	144.958	154.114	176.392
-30.5176	-22.583	-16.7847	-10.9863	-8.8501	-8.8501	-6.10352	-1.2207	0.30518	2.44141	10.0708	22.2778	29.2969	68.3594	150.452	154.724	177.917
-31.1279	-19.5312	-14.9536	-11.9019	-7.93457	-7.93457	-3.96729	-1.83105	1.83105	4.27246	10.0708	19.8364	28.0762	66.5283	151.062	151.062	185.852
-32.0435	-23.1934	-13.7329	-12.8174	-9.46045	-8.8501	-4.27246	-1.52588	-0.61035	3.05176	10.0708	21.0571	27.771	66.2231	147.095	143.433	187.988
-30.8227	-22.8882	-14.9536	-10.9863	-10.0708	-7.62939	-4.57764	-0.91553	1.2207	0.91553	10.6812	24.4141	29.602	62.2559	148.926	141.602	189.209
-29.9072	-20.752	-15.2588	-14.0381	-13.1226	-5.79834	-3.35693	-1.2207	3.66211	3.05176	8.23975	21.0571	24.4141	58.8989	148.315	141.602	190.735
-28.3814	-21.3623	-17.0898	-12.5122	-11.2915	-6.10352	-3.35693	-2.74658	0.61035	3.96729	9.46045	19.2261	23.4985	56.4575	144.653	133.972	191.345
-25.6348	-20.752	-18.6157	-12.5122	-9.15527	-7.01904	-4.57764	-3.66211	-0.30518	1.83105	11.9019	21.9727	24.4141	54.9316	142.822	130.005	201.111
-25.0244	-23.1934	-17.395	-12.5122	-11.2915	-4.57764	-4.57764	-4.88281	2.13623	5.49316	7.32422	20.1416	20.4468	52.4902	148.315	133.362	213.013
-23.4985	-22.583	-17.7002	-13.7329	-8.8501	-9.46045	-3.05176	-3.66211	-0.30518	7.01904	8.54492	18.0054	20.1416	50.354	144.043	132.141	215.759
-21.3623	-21.0571	-16.4795	-11.5967	-9.46045	-9.15527	-2.74658	-1.52588	-0.61035	3.35693	11.5967	20.4468	21.6675	47.6074	142.517	130.005	216.064
-21.0571	-18.3105	-16.4795	-13.7329	-10.0708	-5.49316	-3.96729	-1.83105	3.35693	3.35693	10.376	20.752	17.7002	45.4712	140.076	132.446	218.506
-20.752	-18.3105	-18.0054	-16.7847	-8.54492	-6.71387	-4.27246	-3.05176	2.74658	2.74658	10.6812	18.9209	18.9209	41.5039	136.414	134.277	219.421
-20.1416	-17.395	-16.4795	-12.207	-7.01904	-8.23975	-3.35693	-2.13623	0.91553	1.83105	13.7329	20.1416	23.8037	39.6728	135.498	132.751	213.013
-21.0571	-17.7002	-17.7002	-13.7329	-9.15527	-5.49316	-5.49316	0.91553	3.05176	3.05176	13.1226	19.8364	26.8555	40.8935	132.141	130.31	204.468
-21.9727	-19.5312	-14.9536	-17.0898	-7.62939	-4.88281	-4.27246	0.61035	0.61035	3.96729	10.0708	16.1743	24.7192	42.4194	129.395	127.563	200.195
-20.4468	-19.5312	-14.9536	-13.4277	-5.79834	-10.0708	-4.57764	-1.52588	0.61035	2.74658	12.5122	18.9209	28.0762	40.8935	128.479	124.512	200.5
-21.0571	-17.395	-15.8691	-13.4277	-7.62939	-7.01904	-4.27246	-2.74658	2.44141	2.44141	12.207	20.1416	30.2124	43.0298	135.498	123.596	199.585
-20.752	-19.2261	-15.2588	-16.1743	-7.93457	-6.40869	-3.35693	-2.74658	-0.30518	6.40869	10.9863	16.4795	30.2124	46.3867	142.517	128.784	196.533
-18.6157	-19.2261	-16.1743	-13.1226	-8.23975	-8.54492	-4.88281	-2.44141	-0.30518	3.35693	10.6812	16.1743	32.959	50.6592	140.381	129.089	195.007
-19.2261	-16.1743	-16.7847	-13.1226	-7.93457	-8.23975	-3.96729	-2.44141	1.52588	2.74658	8.23975	15.8691	37.2315	53.7109	138.855	127.258	199.89
-19.2261	-18.0054	-16.1743	-15.2588	-7.32422	-7.32422	-5.49316	-2.13623	0.91553	3.66211	6.10352	13.7329	36.6211	57.0679	134.277	122.986	205.383
-19.2261	-18.9209	-17.0898	-11.9019	-6.40869	-7.93457	-3.35693	-0.61035	-0.91553	3.96729	9.15527	14.6484	39.3677	58.5938	125.732	115.051	198.975
-18.0054	-17.0898	-15.2588	-11.9019	-8.8501	-6.10352	-3.96729	-1.2207	3.35693	3.35693	10.0708	16.4795	41.1987	60.73	128.174	107.727	189.819
-18.0054	-14.6484	-15.564	-16.4795	-9.15527	-3.96729	-4.57764	-0.61035	4.57764	4.57764	7.62939	17.0898	39.0625	61.9507	129.395	104.37	184.937
-17.7002	-14.9536	-15.564	-14.6484	-7.62939	-8.8501	-3.96729	-0.61035	-0.30518	5.18799	10.6812	16.7847	41.8091	62.2559	119.934	97.0459	179.443
-17.0898	-13.4277	-16.1743	-12.5122	-7.93457	-8.8501	-3.66211	0.61035	0.61035	3.66211	10.6812	17.395	44.8608	63.1714	116.577	92.1631	182.495
-17.395	-13.4277	-13.1226	-15.2588	-6.71387	-5.18799	-3.66211	0.91553	3.05176	5.18799	10.376	17.7002	43.9453	65.3076	118.103	92.1631	184.937
-19.2261	-15.2588	-14.6484	-14.9536	-8.23975	-6.71387	-4.88281	-0.30518	-0.30518	3.96729	12.5122	19.2261	46.0815	65.6128	119.019	90.332	181.274
-18.0054	-15.8691	-16.4795	-11.5967	-9.46045	-8.8501	-4.88281	0	0.61035	2.44141	10.9863	21.0571	51.5747	64.3921	117.798	90.0269	177.917
-17.395	-13.1226	-14.3433	-16.1743	-9.15527	-6.71387	-4.27246	-1.83105	2.13623	4.57764	9.76563	18.3105	49.7437	64.0869	116.577	97.9614	177.307
-17.0898	-14.6484	-14.0381	-17.0898	-8.23975	-5.79834	-2.44141	-2.74658	1.52588	5.18799	11.5967	18.6157	48.2178	64.6973	110.474	101.013	179.443
-14.9536	-17.7002	-14.3433	-12.8174	-7.32422	-7.01904	-0.30518	-2.13623	1.52588	3.96729	11.2915	20.4468	52.7954	66.2231	104.98	104.98	177.612
-14.6484	-17.395	-12.5122	-13.7329	-6.10352	-6.40869	-0.91553	-1.83105	3.96729	5.18799	8.8501	21.0571	54.0161	67.1387	110.168	111.084	177.612
-13.7329	-17.395	-14.6484	-14.9536	-6.10352	-7.62939	-2.13623	-1.52588	1.52588	5.79834	8.54492	19.2261	53.4058	71.7163	116.272	114.746	177.612
-14.6484	-18.0054	-17.0898	-12.8174	-6.40869	-9.15527	-1.83105	-0.91553	2.44141	4.57764	9.15527	19.8364	54.3213	69.5801	119.629	121.155	174.561
-15.8691	-14.0381	-14.9536	-14.6484	-8.23975	-4.88281	-3.66211	-2.13623	3.05176	4.27246	8.8501	19.8364	50.9644	67.749	123.901	125.122	170.288
-14.3433	-16.1743	-13.4277	-15.8691	-7.62939	-5.49316	-2.44141	0	0	6.71387	8.54492	19.5312	48.523	69.5801	124.817	118.713	168.762
-11.9019	-18.9209	-15.2588	-14.9536	-7.93457	-7.32422	-4.57764	0	-0.61035	4.27246	10.376	22.8882	46.9971	69.2749	126.953	108.948	165.71
-12.5122	-17.0898	-15.2588	-14.0381	-9.15527	-6.71387	-4.57764	-0.61035	1.83105	3.35693	8.23975	21.0571	44.8608	73.8525	128.479	108.643	163.269
-14.0381	-17.395	-17.7002	-16.1743	-8.8501	-6.40869	-3.96729	-1.2207	-0.30518	5.49316	7.01904	16.4795	43.9453	79.0405	128.784	107.727	167.236
-12.5122	-18.6157	-19.8364	-13.4277	-7.32422	-8.23975	-5.49316	-3.05176	-0.30518	3.05176	12.5122	18.9209	46.3867	79.9561	128.174	97.9614	162.964
-14.3433	-17.7002	-22.2778	-14.3433	-8.8501	-6.10352	-4.57764	-2.74658	3.05176	3.96729	10.376	17.7002	45.166	78.4302	131.836	96.1304	163.269
-12.207	-18.3105	-21.9727	-18.0054	-8.54492	-5.79834	-3.96729	-2.13623	2.13623	7.01904	8.23975	14.9536	39.6728	81.1768	131.531	101.624	172.119
-11.2915	-16.7847	-22.583	-14.0381	-8.54492	-9.15527	-2.74658	1.83105	-1.83105	3.05176	10.376	17.7002	38.7573	79.0405	126.953	102.844	177.612
-13.1226	-14.6484	-21.3623	-12.8174	-10.376	-7.62939	-1.83105	0	1.2207	2.13623	10.6812	20.4468	37.2315	76.9043	130.615	103.76	183.105
-14.6484	-15.8691	-21.0571	-15.2588	-10.9863	-4.88281	-2.44141	-0.91553	1.2207	3.66211	7.32422	17.0898	35.0952	76.9043	134.583	108.643	196.228
-14.6484	-15.8691	-23.1934	-13.4277	-11.2915	-6.71387	-3.05176	-0.91553	0.91553	3.35693	8.8501	16.1743	33.8745	77.2095	129.089	113.22	205.078
-14.3433	-14.0381	-21.3623	-14.0381	-10.6812	-7.93457	-3.66211	-0.91553	2.74658	3.66211	8.8501	15.8691	35.7056	74.1577	126.038	113.22	213.318
-13.7329	-10.6812	-20.1416	-15.8691	-7.32422	-3.96729	-6.10352	-2.13623	3.66211	6.10352	7.32422	12.5122	31.1279	74.1577	126.648	113.525	221.252
-13.1226	-16.4795	-21.3623	-13.4277	-8.23975	-7.93457	-3.96729	-1.52588	0.61035	5.79834	10.9863	12.5122	28.9917	75.3784	119.324	111.389	223.389
-12.8174	-16.7847	-21.9727	-13.4277	-8.23975	-7.32422	-2.13623	-0.91553	3.05176	2.44141	8.23975	16.1743	29.602	74.1577	117.493	112	227.356
-11.2915	-14.3433	-21.3623	-17.0898	-9.15527	-5.49316	-2.74658	-3.66211	5.18799	4.27246	6.40869	14.0381	24.1089	78.7353	120.85	116.882	236.816
-9.76563	-14.6484	-21.6675	-16.4795	-10.376	-5.49316	-2.74658	-2.74658	1.52588	3.05176	9.46045	12.207	24.1089	78.7353	121.765	118.408	242.615
-9.76563	-15.2588	-23.4985	-11.2915	-9.76563	-7.93457	-3.96729	-1.52588	2.74658	1.52588	10.0708	14.0381	23.8037	75.6836	121.765	123.901	238.953
-10.0708	-15.564	-21.0571	-14.9536	-10.376	-6.40869	-4.88281	-0.91553	3.05176	6.10352	7.62939	15.564	24.7192	75.9888	127.258	127.563	242.31
-11.2915	-16.4795	-22.8882	-14.9536	-11.9019	-6.71387	-4.27246	-1.52588	1.2207	6.10352	8.8501	15.2588	24.7192	80.8716	130.005	125.122	246.887
-9.15527	-16.4795	-23.1934	-12.5122	-10.6812	-10.376	-2.13623	-2.13623	-0.30518	4.27246	10.6812	17.7002	27.771	78.7353	132.751	125.122	251.16
-9.15527	-14.3433	-21.6675	-13.4277	-11.2915	-6.71387	-3.96729	-3.05176	1.52588	5.49316	8.8501	18.3105	28.6865	73.8525	133.972	122.986	255.432
-12.8174	-16.4795	-22.2778	-12.8174	-10.6812	-7.01904	-4.27246	-3.35693	-1.2207	4.57764	9.46045	18.9209	27.771	72.0215	132.141	119.934	257.874
-11.9019	-17.7002	-21.9727	-12.8174	-8.8501	-8.54492	-2.74658	0	0	1.2207	10.376	22.583	30.2124	69.5801	132.141	120.239	247.803
-12.5122	-14.0381	-19.8364	-14.9536	-8.8501	-8.23975	-2.13623	-0.61035	3.35693	3.05176	6.71387	21.6675	30.8227	69.5801	131.531	126.648	239.868
-8.23975	-13.7329	-20.4468	-16.4795	-10.9863	-6.71387	-2.44141	-0.91553	0.61035	6.10352	6.71387	19.5312	30.5176	68.0542	128.174	132.446	228.577
-9.15527	-14.9536	-21.9727	-13.7329	-10.376	-8.23975	-3.35693	-1.52588	0.30518	6.10352	10.0708	20.1416	31.7383	62.2559	121.155	132.751	209.351
-7.32422	-9.76563	-20.4468	-13.7329	-9.15527	-7.32422	-3.66211	-2.74658	1.83105	4.57764	7.32422	19.5312	31.1279	54.9316	119.019	137.939	202.637
-7.01904	-7.93457	-20.1416	-15.564	-11.2915	-4.27246	-5.49316	-3.96729	0.91553	5.49316	4.88281	19.2261	32.0435	48.523	120.239	144.653	200.806
-9.15527	-9.46045	-20.1416	-13.1226	-10.9863	-8.8501	-4.57764	-1.2207	-1.2207	2.44141	7.62939	21.6675	32.6538	42.1143	119.019	137.939	196.228
-10.6812	-9.76563	-20.1416	-14.0381	-8.54492	-9.76563	-2.44141	-1.52588	1.52588	2.74658	7.62939	24.7192	34.1797	37.8418	117.493	131.531	198.059
-9.46045	-10.0708	-19.2261	-15.8691	-6.40869	-8.54492	-2.44141	-3.35693	0.91553	3.05176	5.79834	20.752	34.79	37.2315	115.356	127.258	200.5
-11.9019	-10.6812	-19.2261	-12.207	-8.54492	-9.15527	-1.83105	0.30518	-0.30518	2.44141	9.76563	21.9727	37.8418	36.3159	106.812	120.544	196.533
-14.3433	-9.76563	-18.9209	-10.0708	-7.93457	-7.32422	-2.44141	0.30518	0.91553	4.27246	8.54492	22.583	36.6211	38.4522	103.455	119.019	184.326
-12.5122	-10.6812	-18.0054	-12.8174	-7.93457	-4.88281	-4.27246	-1.83105	2.13623	5.49316	6.10352	16.7847	37.8418	39.6728	104.065	119.019	176.086
-11.9019	-14.0381	-21.3623	-10.9863	-8.8501	-6.10352	-4.57764	-0.30518	-1.2207	4.88281	8.54492	18.9209	37.8418	43.335	99.1821	116.577	174.866
-13.4277	-12.5122	-21.6675	-9.46045	-8.8501	-7.93457	-3.35693	0	-1.83105	3.66211	7.93457	19.2261	41.1987	43.0298	97.6562	114.746	178.223
-13.1226	-11.9019	-17.7002	-12.207	-9.15527	-5.79834	-2.13623	-3.96729	1.52588	5.49316	5.49316	17.7002	42.1143	42.1143	99.7925	112.305	184.631
-12.5122	-14.3433	-19.2261	-11.5967	-7.32422	-6.10352	-1.52588	-2.74658	-0.61035	5.18799	6.71387	17.0898	42.1143	45.7764	97.0459	107.422	182.495
-12.8174	-14.6484	-22.2778	-9.46045	-6.10352	-10.0708	-4.27246	-1.2207	2.44141	3.96729	6.10352	20.4468	43.6401	47.3023	95.52	105.896	176.697
-15.8691	-11.5967	-18.3105	-10.6812	-4.27246	-7.01904	-4.27246	-1.52588	3.05176	4.27246	3.05176	19.5312	44.8608	49.4385	97.3511	112.61	171.814
-15.564	-15.8691	-18.0054	-10.376	-6.10352	-7.01904	-2.74658	-2.44141	0.61035	3.05176	4.88281	19.8364	46.9971	50.9644	97.0459	115.967	169.373
-17.0898	-18.3105	-20.752	-9.15527	-8.23975	-7.01904	-3.96729	-0.91553	1.2207	2.13623	6.40869	22.8882	43.6401	49.1333	95.8252	116.272	167.236
-17.7002	-13.4277	-19.5312	-14.0381	-7.62939	-7.62939	-4.27246	-2.13623	3.05176	3.35693	7.01904	21.0571	42.7246	48.523	97.3511	126.038	172.729
-15.2588	-12.5122	-22.583	-12.207	-7.93457	-7.93457	-4.57764	-3.05176	0.91553	2.74658	8.23975	18.0054	42.4194	46.9971	94.6045	133.667	171.814
-16.7847	-13.1226	-24.7192	-7.32422	-9.76563	-8.54492	-3.05176	0	-2.74658	4.57764	8.8501	16.7847	42.4194	44.8608	89.4165	135.498	171.814
-15.8691	-12.207	-20.752	-10.9863	-9.15527	-4.88281	-3.66211	-2.74658	0.61035	6.10352	6.71387	18.3105	44.2505	43.6401	88.501	140.991	179.443
-14.0381	-14.6484	-21.9727	-10.6812	-9.46045	-5.79834	-2.74658	-4.57764	0	7.32422	8.23975	15.8691	42.7246	44.2505	86.6699	144.348	184.937
-15.8691	-14.0381	-25.6348	-9.46045	-8.23975	-10.9863	-3.05176	-1.83105	0.91553	4.57764	11.2915	18.0054	42.1143	44.2505	86.9751	145.569	187.988
-18.6157	-13.4277	-21.9727	-10.376	-5.49316	-7.93457	-4.57764	-1.83105	5.18799	3.96729	7.01904	18.3105	41.5039	43.335	86.3648	147.095	192.261
-17.7002	-11.9019	-19.5312	-11.5967	-6.10352	-6.40869	-3.05176	-2.13623	2.74658	3.35693	7.01904	18.3105	43.6401	45.7764	89.7217	143.738	201.111
-15.564	-14.3433	-23.1934	-10.376	-8.8501	-7.93457	-2.74658	0	0.30518	3.35693	10.376	19.5312	44.8608	48.8281	93.0786	134.277	204.468
-15.564	-11.2915	-21.3623	-10.6812	-9.15527	-8.23975	-2.44141	1.83105	2.13623	4.27246	8.23975	18.3105	44.5557	45.7764	97.0459	129.7	208.13
-13.1226	-12.5122	-20.1416	-15.8691	-9.46045	-5.49316	-4.27246	0	1.2207	5.49316	9.76563	18.9209	45.7764	45.4712	101.318	126.343	214.844
-12.207	-17.0898	-22.8882	-14.0381	-8.54492	-8.8501	-3.96729	2.13623	-1.2207	6.10352	11.2915	18.0054	45.166	41.1987	98.2666	123.596	213.928
-12.207	-15.8691	-21.9727	-11.9019	-9.46045	-8.54492	-4.88281	2.44141	2.74658	4.27246	10.376	19.2261	45.7764	37.8418	99.1821	123.291	216.675
-12.207	-15.8691	-21.3623	-13.4277	-8.54492	-6.10352	-3.96729	-0.30518	3.96729	4.57764	7.93457	17.7002	46.3867	38.7573	97.9614	126.038	225.83
-10.376	-18.0054	-21.9727	-14.0381	-7.93457	-7.93457	-3.35693	-1.52588	1.52588	6.10352	12.207	20.752	46.9971	39.978	94.6045	124.817	221.863
-11.2915	-19.5312	-21.6675	-11.9019	-7.01904	-7.62939	-4.88281	-1.52588	1.83105	4.27246	10.6812	24.4141	46.9971	37.5366	89.7217	130.615	213.318
-12.8174	-18.9209	-19.5312	-14.0381	-5.18799	-3.96729	-4.88281	-0.91553	2.74658	4.27246	10.6812	24.1089	49.7437	40.2832	90.0269	137.329	222.473
-10.376	-20.1416	-21.0571	-12.5122	-7.32422	-3.05176	-3.66211	-2.44141	-0.30518	6.40869	12.207	24.7192	51.2695	42.4194	87.2803	135.803	226.44
-11.5967	-20.752	-21.9727	-10.0708	-6.71387	-7.32422	-3.96729	-2.44141	-0.61035	6.40869	13.1226	27.771	50.0488	40.8935	81.4819	130.31	221.863
-14.6484	-18.9209	-18.6157	-13.1226	-8.54492	-4.88281	-3.66211	-3.35693	1.83105	7.01904	9.15527	28.9917	47.9126	42.4194	78.125	125.732	226.135
-11.9019	-22.8882	-19.8364	-11.9019	-11.5967	-4.88281	-3.05176	-2.13623	-0.30518	4.27246	9.46045	27.4658	49.4385	45.7764	71.106	121.765	231.018
-12.5122	-22.8882	-23.4985	-11.5967	-11.5967	-7.62939	-1.52588	-0.61035	0.91553	3.66211	11.5967	27.771	49.4385	44.2505	66.5283	122.375	232.544
-14.6484	-20.4468	-20.4468	-14.3433	-9.46045	-3.66211	-3.35693	-1.52588	3.66211	3.66211	8.8501	26.2451	47.3023	43.0298	67.749	124.207	237.732
-15.8691	-23.1934	-18.6157	-13.1226	-9.46045	-2.44141	-2.74658	-1.52588	0	2.74658	10.9863	23.4985	46.9971	44.2505	66.8335	124.512	240.173
-18.0054	-24.7192	-20.1416	-9.15527	-8.54492	-6.71387	-3.96729	0	0	3.35693	12.207	22.2778	45.4712	40.5884	64.0869	121.155	238.953
-17.395	-21.9727	-18.9209	-10.9863	-7.01904	-6.40869	-4.57764	-1.83105	1.83105	5.18799	9.15527	23.8037	44.8608	37.5366	66.5283	121.46	238.953
-13.7329	-22.8882	-18.3105	-13.1226	-7.62939	-3.66211	-3.35693	-3.05176	-0.30518	7.01904	10.376	24.4141	43.335	43.335	65.6128	120.544	238.037
-11.2915	-24.7192	-21.9727	-10.376	-8.8501	-9.15527	-4.88281	-1.52588	-1.52588	3.96729	12.207	23.1934	43.335	47.6074	58.8989	117.188	231.323
-13.7329	-21.9727	-18.0054	-11.5967	-7.01904	-8.23975	-5.18799	-0.30518	0.61035	3.35693	11.2915	25.0244	46.0815	47.6074	57.9834	117.493	229.797
-12.207	-22.2778	-18.0054	-11.9019	-7.32422	-4.57764	-4.27246	-0.91553	-0.30518	2.74658	11.5967	25.0244	47.6074	54.3213	55.542	117.798	231.628
-13.4277	-25.0244	-20.4468	-10.9863	-9.46045	-5.18799	-3.96729	-0.30518	-2.13623	2.13623	13.1226	26.2451	47.3023	57.9834	48.8281	114.136	228.577
-14.9536	-26.2451	-18.0054	-11.2915	-7.01904	-6.71387	-3.96729	-3.05176	0	4.88281	7.32422	28.3814	45.7764	54.3213	47.3023	121.765	231.323
-15.8691	-27.4658	-17.0898	-10.6812	-5.79834	-6.40869	-4.57764	-4.27246	0.91553	5.79834	7.32422	27.1606	47.3023	51.8799	48.2178	134.888	242.92
-15.2588	-29.9072	-18.9209	-7.62939	-9.15527	-8.23975	-4.57764	-2.44141	-0.30518	3.35693	9.46045	28.9917	47.3023	55.8472	46.9971	138.55	252.686
-17.0898	-28.0762	-18.6157	-9.15527	-7.01904	-7.93457	-2.74658	-0.91553	0.61035	4.88281	7.62939	26.8555	47.6074	56.7627	51.2695	138.245	264.282
-15.8691	-26.2451	-16.7847	-11.2915	-8.23975	-7.93457	-3.35693	-3.35693	0	5.79834	8.8501	29.9072	46.9971	58.8989	60.1196	135.803	276.794
-17.7002	-26.8555	-21.0571	-10.6812	-8.8501	-7.93457	-4.88281	-3.05176	-3.05176	3.05176	10.9863	29.602	45.4712	60.4248	60.73	133.667	279.236
-21.3623	-25.9399	-20.752	-8.23975	-5.79834	-7.93457	-6.10352	-2.13623	1.52588	1.52588	9.46045	29.602	44.2505	58.2886	62.561	135.498	274.963
-21.0571	-24.7192	-16.7847	-10.6812	-4.27246	-5.18799	-5.49316	-2.44141	3.05176	3.66211	6.10352	28.0762	43.335	58.5938	66.8335	132.751	274.963
-18.6157	-27.4658	-16.4795	-11.9019	-7.01904	-7.62939	-2.44141	-3.05176	1.2207	2.74658	10.9863	28.3814	43.6401	60.4248	69.2749	123.596	268.555
-17.7002	-24.7192	-16.1743	-10.6812	-7.93457	-8.54492	-3.96729	-0.91553	0.30518	2.13623	9.76563	30.8227	44.2505	56.4575	75.0732	120.239	260.925
-20.752	-20.752	-14.3433	-12.207	-7.01904	-5.18799	-3.66211	-2.44141	3.35693	2.74658	9.76563	28.3814	48.2178	50.9644	84.2285	117.798	265.198
-15.8691	-23.4985	-16.4795	-13.1226	-9.15527	-6.40869	-2.74658	-1.2207	1.2207	3.05176	11.2915	28.6865	48.8281	49.7437	87.8906	116.577	262.451
-12.207	-23.1934	-18.0054	-11.9019	-9.76563	-9.76563	-3.05176	0.61035	0.30518	1.52588	8.54492	27.771	47.3023	45.7764	89.4165	114.136	255.737
-13.1226	-16.4795	-16.7847	-12.207	-7.93457	-6.10352	-3.05176	-2.44141	1.2207	3.35693	7.32422	28.0762	48.8281	42.4194	91.5527	112.61	255.737
-9.76563	-16.4795	-19.5312	-11.2915	-7.62939	-5.79834	-6.10352	-0.91553	-2.13623	5.18799	7.93457	29.602	49.4385	40.8935	87.5854	109.863	253.601
-10.0708	-18.0054	-19.8364	-8.8501	-8.8501	-9.15527	-5.49316	-0.61035	-1.83105	4.88281	9.76563	28.0762	48.523	35.4004	88.8062	109.558	244.446
-13.1226	-14.9536	-18.6157	-10.9863	-7.62939	-6.40869	-4.27246	-1.83105	2.13623	4.57764	6.71387	27.4658	53.4058	34.4849	91.2476	113.525	239.868
-12.5122	-17.7002	-17.395	-11.9019	-7.62939	-5.18799	-3.35693	-4.27246	-1.52588	3.96729	9.76563	28.3814	57.9834	38.4522	93.3838	115.356	237.427
-11.9019	-17.7002	-18.6157	-11.2915	-9.15527	-6.71387	-3.96729	-0.91553	0.61035	4.27246	9.15527	27.4658	59.8145	39.3677	93.3838	119.934	233.154
-15.2588	-13.4277	-16.4795	-13.4277	-7.62939	-5.49316	-4.88281	-0.30518	3.05176	4.88281	9.15527	27.4658	60.4248	41.8091	96.1304	127.869	234.985
-15.8691	-14.6484	-14.9536	-13.7329	-8.8501	-5.18799	-4.27246	-3.66211	0.61035	4.57764	12.207	28.3814	59.2041	44.8608	99.4873	131.226	232.239
-15.564	-17.0898	-15.564	-10.9863	-8.23975	-7.32422	-3.66211	0.30518	-0.30518	3.05176	11.9019	26.8555	57.373	41.5039	105.896	126.953	222.168
-19.2261	-17.395	-12.207	-12.5122	-6.40869	-6.71387	-3.66211	0	1.52588	6.40869	9.46045	25.9399	57.373	39.6728	115.967	130.31	215.759
-18.3105	-16.1743	-14.0381	-15.2588	-6.71387	-3.05176	-2.74658	-2.74658	2.13623	6.40869	10.0708	23.8037	57.9834	43.335	118.713	132.446	211.487
-17.395	-18.6157	-15.8691	-13.7329	-8.54492	-6.71387	-2.44141	-2.44141	1.2207	3.66211	12.207	22.583	56.4575	43.335	117.188	128.174	205.383
-17.395	-14.0381	-14.3433	-11.9019	-6.71387	-7.01904	-2.13623	-1.83105	2.74658	3.35693	8.54492	21.9727	55.8472	40.2832	119.629	126.953	196.838
-17.7002	-10.9863	-14.3433	-14.0381	-6.71387	-3.05176	-3.35693	-2.13623	2.13623	3.05176	10.6812	22.8882	57.6782	44.2505	119.324	123.901	196.228
-15.2588	-14.9536	-18.3105	-12.5122	-7.62939	-5.49316	-2.44141	-1.83105	0.61035	4.88281	11.5967	23.1934	57.0679	49.4385	113.525	120.544	198.669
-19.2261	-12.8174	-18.3105	-10.9863	-6.40869	-5.79834	-3.05176	-0.30518	0.91553	4.57764	9.76563	20.4468	58.5938	46.3867	111.694	116.577	198.975
-17.0898	-11.9019	-15.2588	-13.4277	-7.93457	-6.40869	-4.27246	0.30518	2.13623	4.27246	11.9019	20.4468	62.2559	48.523	110.168	112	199.28
-15.2588	-15.2588	-17.0898	-12.207	-10.0708	-6.71387	-0.91553	-1.2207	0.30518	4.88281	12.8174	21.0571	61.0352	54.0161	106.201	108.948	195.618
-17.7002	-16.7847	-16.7847	-11.5967	-7.62939	-7.62939	-2.44141	-0.61035	1.52588	4.88281	10.9863	21.3623	58.8989	53.1006	104.675	112.305	186.462
-19.8364	-14.9536	-15.2588	-14.3433	-6.71387	-4.57764	-3.66211	-2.13623	3.35693	5.18799	10.9863	23.1934	58.5938	51.8799	104.065	117.493	176.086
-17.395	-19.2261	-17.7002	-13.7329	-9.46045	-3.66211	-1.52588	-2.13623	-0.30518	4.27246	13.4277	22.8882	57.9834	50.6592	100.708	124.512	166.016
-16.7847	-19.5312	-19.8364	-13.4277	-7.93457	-7.01904	-0.91553	-0.61035	2.44141	4.27246	12.5122	22.8882	57.9834	42.7246	100.098	128.784	161.438
-22.2778	-16.1743	-17.395	-13.1226	-4.27246	-4.57764	-0.30518	-3.35693	3.35693	7.01904	9.46045	23.1934	58.2886	39.6728	102.844	134.277	160.828
-20.4468	-19.8364	-16.7847	-16.4795	-8.8501	-3.35693	-2.74658	-3.05176	0.91553	4.57764	9.15527	22.583	56.7627	43.6401	101.929	143.738	154.724
-24.4141	-24.7192	-18.6157	-15.564	-9.46045	-7.62939	-4.57764	1.2207	1.2207	4.27246	9.46045	19.8364	55.8472	42.1143	100.098	148.01	148.01
-25.3296	-22.583	-14.0381	-15.8691	-6.10352	-7.01904	-5.18799	0	2.74658	5.79834	10.376	21.0571	56.7627	41.8091	99.7925	152.588	146.79
-21.3623	-18.9209	-14.0381	-17.7002	-7.62939	-3.05176	-2.74658	-2.74658	-0.91553	3.96729	10.9863	21.0571	55.8472	44.8608	91.8579	158.386	150.146
-21.3623	-18.3105	-15.564	-12.8174	-9.15527	-6.40869	-3.05176	-1.52588	-1.2207	3.05176	10.6812	23.4985	49.1333	43.6401	86.3648	168.457	150.757
-21.0571	-16.4795	-12.8174	-14.0381	-5.49316	-7.01904	-3.96729	-0.30518	2.74658	4.88281	8.8501	27.1606	49.4385	37.5366	84.2285	177.307	153.503
-20.4468	-18.3105	-12.207	-14.3433	-7.93457	-7.62939	-3.96729	-0.30518	1.52588	2.74658	10.0708	25.0244	48.8281	40.2832	83.0078	180.359	152.283
-16.7847	-18.0054	-15.564	-14.6484	-9.46045	-9.46045	-4.88281	0.61035	1.2207	3.96729	9.76563	25.6348	49.1333	46.0815	83.313	175.476	153.198
-18.6157	-15.564	-14.0381	-14.0381	-5.49316	-8.8501	-5.18799	1.83105	2.13623	4.27246	8.54492	24.7192	50.9644	49.7437	88.8062	173.95	151.367
-17.7002	-16.7847	-11.2915	-15.8691	-7.01904	-4.27246	-3.96729	-2.13623	1.83105	4.57764	12.207	28.6865	52.7954	58.5938	89.1113	177.917	144.348
-15.2588	-19.5312	-14.9536	-14.0381	-11.2915	-5.18799	-3.66211	-1.52588	0	2.74658	11.5967	25.0244	50.354	64.3921	82.3975	177.917	141.907
-14.3433	-17.0898	-13.4277	-11.9019	-6.71387	-8.54492	-3.35693	-0.30518	1.2207	3.35693	9.46045	23.8037	50.354	63.4766	86.0596	177.917	140.381
-11.2915	-16.4795	-12.8174	-15.564	-5.18799	-4.27246	-3.35693	-3.66211	2.44141	4.27246	10.376	24.4141	51.5747	64.3921	85.4492	177.307	138.855
-11.2915	-20.1416	-14.6484	-18.9209	-8.8501	-5.49316	-4.27246	-3.35693	0.91553	2.74658	11.9019	22.583	51.5747	71.106	84.2285	177.307	135.193
-13.1226	-17.395	-14.6484	-17.7002	-7.62939	-7.32422	-2.44141	-3.05176	2.13623	3.96729	8.23975	21.9727	51.2695	72.6318	86.9751	173.34	139.465
-14.3433	-15.2588	-14.0381	-16.1743	-6.40869	-4.27246	-3.66211	-2.13623	0.30518	4.27246	8.8501	23.1934	50.0488	78.125	83.6182	173.035	154.724
-14.6484	-17.395	-14.9536	-14.9536	-10.376	-3.96729	-3.66211	-0.91553	-1.52588	6.40869	9.46045	23.4985	50.6592	80.8716	77.8198	183.411	161.743
-16.7847	-15.8691	-17.0898	-14.0381	-7.32422	-5.79834	-2.74658	-1.2207	1.52588	4.88281	5.79834	21.0571	50.9644	79.3457	78.4302	184.631	159.302
-19.2261	-13.4277	-11.2915	-15.2588	-5.79834	-3.66211	-3.96729	1.2207	3.35693	4.27246	7.93457	20.752	52.7954	79.6509	83.6182	180.054	156.86
-16.4795	-15.2588	-13.1226	-16.1743	-6.40869	-3.66211	-3.35693	-2.74658	-0.61035	4.57764	7.93457	22.8882	51.2695	81.4819	82.3975	179.749	151.978
-17.0898	-16.7847	-16.4795	-16.7847	-7.01904	-6.10352	-5.49316	-0.30518	0.61035	3.05176	6.40869	20.4468	48.2178	76.5991	83.0078	182.8	149.536
-19.2261	-14.0381	-13.7329	-18.0054	-5.49316	-3.96729	-3.05176	-3.05176	2.13623	4.57764	5.79834	22.2778	50.354	72.6318	90.9424	184.326	154.114
-20.4468	-18.0054	-14.6484	-17.0898	-8.23975	-3.96729	-3.96729	-1.83105	0.91553	4.27246	8.23975	21.9727	48.2178	71.106	95.52	180.359	164.185
-22.583	-15.564	-14.9536	-14.9536	-9.46045	-7.01904	-3.05176	-1.2207	1.83105	3.35693	7.01904	19.2261	46.6919	66.5283	104.065	173.95	179.138
-21.0571	-14.0381	-12.207	-18.6157	-6.10352	-5.79834	-2.74658	-2.44141	0.91553	4.88281	7.01904	18.3105	49.4385	64.0869	112	164.49	191.04
-20.752	-17.395	-11.9019	-18.0054	-6.71387	-3.66211	-2.74658	-3.05176	-1.52588	4.27246	10.0708	20.752	47.3023	62.8662	113.22	162.048	191.956
-22.2778	-17.395	-17.395	-17.395	-7.01904	-8.8501	-3.35693	-0.30518	-1.52588	2.74658	8.23975	18.3105	43.335	61.0352	114.746	169.983	194.397
-25.6348	-13.4277	-17.395	-16.1743	-4.57764	-8.23975	-3.35693	-0.91553	2.44141	5.49316	7.93457	16.1743	45.166	56.4575	118.713	179.138	198.975
-21.0571	-15.564	-16.1743	-16.1743	-8.8501	-4.57764	-2.74658	-4.88281	0.91553	6.71387	9.46045	18.6157	44.5557	57.9834	115.356	188.904	204.163
-20.752	-16.1743	-18.3105	-15.2588	-10.0708	-7.62939	-3.35693	-0.91553	0.30518	4.88281	12.207	18.3105	38.7573	58.2886	121.155	190.735	205.994
-22.583	-14.0381	-16.7847	-17.395	-7.62939	-9.76563	-2.74658	-0.91553	1.2207	3.96729	11.2915	17.0898	36.9263	57.0679	127.563	193.481	213.623
-19.5312	-14.3433	-16.1743	-17.395	-7.32422	-5.49316	-3.05176	-3.05176	-1.52588	4.57764	11.5967	19.2261	36.3159	63.4766	122.986	196.838	215.149
-16.4795	-18.0054	-15.2588	-12.207	-8.54492	-5.79834	-4.27246	-1.2207	-1.2207	3.35693	10.6812	17.395	36.0107	66.2231	118.103	202.332	211.487
-17.0898	-17.0898	-14.0381	-11.5967	-6.71387	-8.8501	-5.18799	-0.61035	1.2207	5.49316	9.76563	14.6484	38.147	64.3921	117.493	202.026	211.487
-17.7002	-15.2588	-12.207	-12.207	-6.71387	-7.32422	-4.88281	-2.44141	2.44141	7.01904	13.1226	17.395	42.7246	65.918	115.356	198.975	206.299
-14.3433	-16.4795	-15.8691	-12.8174	-8.8501	-7.01904	-4.57764	-2.13623	0.61035	5.49316	10.9863	15.2588	45.4712	69.8852	110.168	196.228	207.52
-17.395	-12.8174	-14.3433	-12.5122	-9.76563	-8.23975	-6.10352	-1.52588	3.66211	3.35693	9.46045	12.8174	44.5557	68.6646	112	192.566	209.656
-15.2588	-11.9019	-12.8174	-13.7329	-10.376	-5.18799	-4.88281	-4.57764	2.13623	4.57764	9.46045	16.1743	47.3023	68.0542	113.831	190.735	213.013
-13.1226	-15.2588	-16.7847	-14.3433	-10.0708	-4.88281	-3.96729	-2.74658	-0.61035	4.27246	9.46045	14.9536	45.7764	72.0215	112	188.293	216.675
-15.564	-13.7329	-17.7002	-13.1226	-8.23975	-9.15527	-2.44141	-1.52588	-0.30518	2.74658	10.9863	11.2915	47.9126	71.4111	112.915	190.43	213.623
-15.2588	-10.0708	-13.1226	-14.6484	-4.57764	-7.62939	-3.35693	-3.35693	1.2207	1.52588	10.6812	11.5967	54.0161	70.8008	109.253	188.293	205.688
-14.0381	-14.0381	-13.4277	-14.6484	-8.54492	-7.32422	-4.57764	-1.2207	-1.52588	3.66211	12.207	12.5122	57.9834	73.5474	111.694	190.125	196.838
-14.9536	-13.1226	-13.7329	-13.1226	-8.54492	-10.0708	-4.57764	0.30518	-1.83105	4.57764	9.76563	11.9019	57.0679	73.8525	116.882	193.481	194.702
-18.6157	-10.376	-11.5967	-12.5122	-7.32422	-5.18799	-3.66211	-2.13623	2.74658	5.18799	9.76563	15.8691	59.2041	75.3784	115.967	194.702	193.787
-15.2588	-12.5122	-15.564	-11.2915	-7.93457	-3.35693	-4.27246	0	0.61035	4.57764	12.5122	18.0054	57.373	77.5147	111.694	193.176	196.228
-16.4795	-15.2588	-18.0054	-10.6812	-6.40869	-6.10352	-3.66211	0.91553	-0.30518	2.74658	10.376	13.7329	52.7954	75.3784	110.168	195.312	198.364
-15.2588	-12.8174	-15.2588	-14.0381	-6.10352	-5.79834	-4.27246	0	3.35693	4.88281	11.9019	15.2588	53.1006	76.9043	108.948	201.111	199.585
-14.0381	-14.0381	-14.6484	-12.5122	-8.23975	-4.57764	-1.2207	-0.91553	2.13623	5.18799	11.9019	18.3105	50.9644	81.4819	106.812	205.383	203.247
-16.1743	-15.8691	-18.9209	-11.5967	-7.01904	-5.49316	-2.44141	-0.61035	3.05176	5.49316	12.207	16.7847	50.354	81.7871	110.168	212.097	207.214
-18.0054	-12.207	-17.395	-14.6484	-4.57764	-7.01904	-3.05176	-2.74658	4.88281	4.57764	13.4277	20.1416	50.9644	82.3975	114.746	210.571	212.708
-18.0054	-12.8174	-15.564	-13.7329	-5.79834	-6.10352	-2.74658	-2.44141	2.74658	6.40869	14.6484	23.8037	50.354	87.2803	112.305	206.909	211.487
-14.9536	-11.9019	-14.0381	-14.0381	-5.49316	-9.46045	-4.88281	0.91553	0.91553	4.57764	10.6812	21.3623	49.4385	92.4683	111.694	203.552	212.402
-17.395	-9.15527	-12.8174	-13.4277	-3.05176	-8.23975	-3.35693	2.74658	3.35693	3.96729	9.46045	19.5312	48.2178	91.2476	116.882	198.975	209.351
-14.6484	-9.76563	-12.8174	-15.2588	-6.71387	-6.10352	-3.96729	-2.13623	1.52588	5.18799	11.9019	19.8364	47.3023	93.3838	118.103	192.261	209.045
-14.3433	-11.5967	-16.7847	-12.207	-9.46045	-7.93457	-4.27246	-2.44141	0.91553	3.96729	10.6812	16.1743	43.6401	92.4683	116.272	188.904	206.909
-18.9209	-9.46045	-14.0381	-12.8174	-6.10352	-7.93457	-5.79834	-3.35693	1.52588	5.18799	7.93457	14.9536	44.5557	84.2285	116.577	191.65	206.604
-17.0898	-8.23975	-10.9863	-14.3433	-3.35693	-4.88281	-5.18799	-2.13623	0.61035	5.49316	8.8501	18.6157	46.6919	84.5337	114.136	194.397	209.656
-15.8691	-9.46045	-14.6484	-11.9019	-5.79834	-6.10352	-4.27246	0.30518	0.61035	6.40869	7.93457	17.395	46.3867	82.3975	109.558	193.787	217.285
-20.4468	-7.93457	-13.1226	-12.5122	-5.18799	-8.54492	-3.35693	0.30518	2.44141	5.79834	7.01904	17.0898	45.166	74.4629	109.253	189.209	219.421
-21.9727	-7.32422	-9.15527	-13.1226	-2.74658	-5.49316	-1.52588	-2.74658	1.2207	5.49316	8.23975	21.0571	47.3023	71.7163	110.779	185.242	213.318
-18.3105	-10.0708	-10.376	-14.3433	-7.93457	-9.15527	-1.2207	-1.2207	0	4.27246	9.46045	16.7847	47.6074	75.9888	113.22	185.242	209.045
-17.7002	-11.9019	-11.2915	-11.5967	-5.79834	-8.23975	-0.30518	1.83105	3.05176	3.66211	8.23975	13.1226	46.3867	72.3267	114.746	186.157	203.552
-18.9209	-14.6484	-10.0708	-13.4277	-5.18799	-2.74658	-4.88281	-2.13623	3.05176	2.74658	9.76563	15.8691	48.8281	70.8008	115.051	182.495	194.092
-16.4795	-11.9019	-10.9863	-11.9019	-9.46045	-3.66211	-4.88281	-1.52588	-0.91553	2.74658	9.46045	17.7002	44.8608	72.937	112.305	179.138	190.43
-18.0054	-11.9019	-9.15527	-12.207	-8.23975	-7.62939	-8.23975	-1.83105	1.52588	3.96729	9.15527	16.7847	44.5557	69.5801	113.525	177.612	189.209
-18.3105	-9.15527	-7.01904	-12.8174	-6.10352	-5.49316	-4.57764	-0.30518	2.44141	5.18799	12.207	19.5312	45.7764	67.749	111.389	173.34	181.885
-15.564	-14.0381	-8.54492	-12.5122	-8.54492	-2.74658	-3.66211	0.61035	0.61035	6.71387	11.5967	19.8364	46.0815	70.1904	105.896	175.781	174.255
-15.564	-14.0381	-10.376	-12.207	-7.93457	-8.54492	-6.10352	0.61035	2.44141	5.49316	10.376	15.2588	43.9453	71.106	107.422	186.157	167.542
-19.5312	-12.207	-7.32422	-12.8174	-4.88281	-9.76563	-6.40869	-1.52588	3.05176	3.66211	8.54492	16.7847	46.9971	71.4111	107.727	192.261	167.847
-19.5312	-13.1226	-7.62939	-15.2588	-7.62939	-5.49316	-4.88281	-0.91553	0.91553	3.05176	10.376	20.1416	52.1851	76.2939	104.37	190.43	165.71
-18.6157	-12.207	-11.2915	-13.4277	-8.54492	-7.93457	-4.57764	2.74658	2.13623	1.83105	8.54492	17.395	52.1851	74.1577	101.318	183.411	163.879
-20.752	-12.8174	-7.32422	-12.5122	-6.10352	-9.46045	-4.27246	-1.83105	1.52588	4.27246	8.8501	17.7002	58.5938	71.4111	102.234	183.411	161.438
-19.2261	-10.9863	-7.01904	-13.1226	-6.10352	-6.71387	-1.83105	-3.66211	-1.2207	3.66211	11.9019	19.8364	58.5938	73.2422	102.844	180.969	162.048
-18.6157	-13.7329	-9.15527	-13.1226	-9.15527	-6.40869	-5.18799	-3.05176	-1.2207	3.66211	10.376	18.0054	57.9834	73.8525	106.201	178.528	154.419
-20.4468	-11.5967	-5.79834	-13.4277	-8.23975	-6.71387	-5.18799	-2.74658	2.74658	3.05176	10.0708	18.9209	57.373	72.937	109.863	176.086	146.179
-19.8364	-10.0708	-7.01904	-11.5967	-9.76563	-3.05176	-3.66211	-2.44141	1.83105	3.96729	10.9863	19.5312	60.73	81.4819	111.084	173.645	140.686
-16.4795	-11.5967	-7.62939	-10.6812	-8.54492	-4.57764	-4.88281	-0.61035	0	4.57764	10.9863	17.395	61.9507	85.4492	108.948	180.969	143.127
-19.5312	-11.2915	-5.79834	-10.0708	-8.23975	-8.23975	-2.13623	0	1.52588	7.01904	10.376	18.0054	65.6128	83.0078	112.61	184.937	145.264
-20.4468	-11.2915	-6.40869	-11.9019	-7.93457	-5.49316	-6.10352	-2.44141	0.91553	7.01904	10.9863	21.6675	68.9697	83.0078	115.356	184.021	143.738
-18.0054	-11.9019	-9.76563	-13.1226	-9.15527	-7.32422	-2.74658	0.91553	0	5.79834	8.8501	22.583	63.4766	85.144	120.85	177.307	152.893
-20.752	-11.5967	-7.93457	-10.376	-9.15527	-8.54492	-3.66211	-0.61035	0.61035	3.66211	10.376	22.583	61.3403	83.313	130.31	167.542	163.574
-19.8364	-9.15527	-6.71387	-11.2915	-10.6812	-7.62939	-3.96729	-3.35693	0	4.27246	11.5967	26.2451	59.2041	83.9233	136.108	161.133	169.373
-15.2588	-8.23975	-9.46045	-10.376	-10.9863	-7.01904	-5.18799	-4.27246	-0.30518	5.18799	9.15527	22.8882	56.1523	87.5854	140.381	158.386	173.95
-14.3433	-8.23975	-7.01904	-9.15527	-6.40869	-10.6812	-3.66211	-2.13623	1.52588	4.57764	7.62939	19.2261	52.7954	86.9751	144.653	159.912	179.749
-14.6484	-8.23975	-5.49316	-7.32422	-5.49316	-6.10352	-2.74658	-3.05176	2.13623	6.40869	7.62939	22.8882	51.8799	88.501	148.01	158.691	178.528
-13.4277	-10.9863	-8.23975	-8.8501	-8.8501	-4.88281	-4.57764	-2.13623	0.30518	3.66211	7.93457	22.2778	53.7109	92.7734	144.043	160.522	173.34
-11.5967	-9.46045	-10.6812	-7.62939	-7.62939	-8.8501	-3.05176	2.13623	1.52588	2.74658	5.49316	18.3105	52.7954	91.8579	140.076	164.795	173.34
-14.6484	-10.0708	-8.23975	-8.54492	-7.93457	-8.54492	-3.35693	1.2207	0.91553	6.10352	8.8501	18.6157	55.542	89.1113	135.803	166.626	171.509
-12.207	-10.0708	-9.76563	-9.46045	-9.15527	-8.23975	-6.40869	0	-0.61035	3.96729	7.93457	19.8364	52.7954	87.8906	130.92	163.574	173.035
-11.2915	-9.15527	-10.376	-7.93457	-8.8501	-6.10352	-5.18799	1.83105	2.44141	3.05176	6.10352	16.4795	50.0488	87.5854	127.869	164.49	180.359
-13.4277	-7.62939	-9.15527	-8.8501	-7.32422	-5.18799	-4.88281	-2.44141	1.83105	1.83105	7.01904	18.3105	50.6592	85.7544	126.648	169.678	189.209
-10.9863	-8.23975	-10.9863	-10.6812	-10.9863	-3.05176	-4.88281	-3.05176	-1.2207	3.66211	9.76563	18.9209	50.9644	86.9751	123.596	165.71	193.787
-9.76563	-8.8501	-10.0708	-10.0708	-8.8501	-4.88281	-6.71387	-0.91553	0.30518	4.27246	9.15527	15.8691	49.1333	84.2285	124.207	167.847	204.163
-11.9019	-8.23975	-7.32422	-10.0708	-5.49316	-6.10352	-5.49316	-2.13623	2.13623	4.27246	7.93457	17.7002	51.8799	73.5474	123.291	170.288	199.28
-11.5967	-10.376	-8.23975	-9.46045	-7.93457	-4.57764	-5.18799	-2.44141	1.83105	4.57764	9.46045	19.8364	52.7954	74.4629	115.967	167.542	193.176
-11.9019	-8.54492	-11.5967	-9.76563	-7.62939	-7.93457	-3.35693	0.30518	1.83105	4.88281	6.40869	17.0898	51.5747	75.3784	109.253	162.048	189.819
-18.3105	-6.40869	-9.76563	-9.46045	-5.49316	-6.71387	-2.74658	0.61035	4.57764	5.49316	9.76563	19.2261	52.7954	72.3267	104.98	163.574	180.359
-16.1743	-7.01904	-7.01904	-10.9863	-8.23975	-4.27246	-4.88281	-3.66211	2.13623	3.05176	9.46045	22.8882	50.6592	71.4111	100.708	162.964	168.762
-15.2588	-10.0708	-9.46045	-11.9019	-10.376	-7.01904	-4.88281	-2.13623	0.30518	4.27246	9.15527	21.3623	50.6592	72.3267	100.098	160.828	168.152
-18.9209	-11.5967	-6.40869	-12.5122	-7.32422	-10.0708	-3.96729	-1.52588	0.91553	4.88281	9.76563	22.8882	51.2695	66.8335	102.539	164.185	164.795
-16.1743	-11.5967	-7.01904	-10.0708	-10.0708	-5.79834	-3.96729	-4.27246	-1.52588	6.10352	9.15527	25.3296	50.6592	67.4438	103.149	167.542	155.64
-12.207	-13.7329	-8.54492	-10.0708	-10.0708	-6.10352	-4.88281	-0.30518	0.91553	5.18799	8.23975	23.4985	49.7437	69.8852	105.896	172.424	154.724
-12.5122	-12.8174	-9.46045	-13.4277	-5.79834	-8.23975	-3.66211	0	2.74658	3.35693	8.54492	21.6675	49.1333	66.2231	108.337	177.002	155.945
-14.3433	-11.9019	-7.32422	-14.9536	-7.01904	-5.18799	-3.96729	-0.91553	0	3.66211	9.46045	22.583	49.4385	67.749	104.065	180.359	152.283
-11.2915	-14.9536	-8.54492	-12.5122	-10.6812	-8.23975	-4.88281	0.30518	0.61035	2.44141	5.79834	22.2778	45.166	71.7163	101.624	177.307	148.315
-16.1743	-14.9536	-9.76563	-11.9019	-9.46045	-8.23975	-4.27246	1.2207	0.91553	2.74658	9.46045	21.6675	44.2505	69.8852	100.403	181.58	143.738
-18.0054	-14.3433	-8.8501	-9.46045	-7.01904	-6.10352	-4.27246	-4.27246	-0.91553	3.96729	10.0708	22.583	44.2505	68.3594	99.7925	189.209	138.55
-11.9019	-14.0381	-9.46045	-9.76563	-10.9863	-4.88281	-4.88281	-2.44141	-0.91553	5.49316	8.8501	22.8882	44.8608	73.2422	95.52	191.04	135.498
-13.1226	-15.564	-8.8501	-12.207	-8.54492	-7.32422	-5.18799	1.83105	2.74658	5.79834	7.93457	20.4468	44.8608	73.5474	95.8252	190.43	133.362
-14.6484	-14.6484	-7.01904	-10.6812	-7.62939	-5.79834	-3.35693	-1.2207	1.2207	5.79834	9.46045	22.583	47.9126	72.6318	92.4683	184.021	126.343
-12.8174	-15.564	-8.23975	-10.376	-8.54492	-6.10352	-2.13623	-3.35693	0.91553	6.10352	9.15527	23.4985	48.523	75.0732	86.6699	179.138	130.92
-12.5122	-17.7002	-8.8501	-10.9863	-7.93457	-8.8501	-3.66211	1.52588	1.83105	4.57764	8.54492	21.9727	47.3023	70.4956	89.1113	178.528	139.771
-15.2588	-14.9536	-8.8501	-12.8174	-4.88281	-6.71387	-4.88281	0	1.83105	3.66211	9.76563	24.4141	50.0488	64.6973	88.8062	184.326	138.245
-12.5122	-13.4277	-14.0381	-11.2915	-7.93457	-3.05176	-5.18799	-1.2207	0.61035	4.57764	8.54492	24.1089	49.1333	65.0024	85.7544	183.105	138.55
-10.376	-13.1226	-14.9536	-12.5122	-8.54492	-4.27246	-6.71387	1.2207	1.83105	3.35693	11.2915	22.583	49.1333	63.1714	83.0078	184.021	142.517
-11.5967	-12.8174	-13.1226	-14.3433	-7.01904	-6.40869	-4.88281	-0.91553	2.44141	3.05176	9.15527	24.4141	48.523	61.3403	85.7544	186.157	149.536
-7.93457	-13.1226	-13.7329	-13.4277	-7.93457	-3.35693	-4.57764	-3.96729	1.52588	5.18799	7.01904	26.8555	46.9971	65.3076	84.5337	178.833	153.198
-6.40869	-14.6484	-15.8691	-12.8174	-8.54492	-5.79834	-5.79834	-1.52588	1.2207	3.66211	7.01904	22.8882	46.3867	66.2231	83.9233	176.392	150.757
-8.8501	-13.7329	-15.2588	-10.9863	-8.54492	-6.40869	-4.27246	-1.52588	1.83105	2.44141	7.62939	24.1089	48.523	65.0024	86.6699	174.255	147.705
-5.18799	-13.1226	-14.0381	-11.9019	-8.8501	-3.35693	-4.88281	-1.52588	0	3.96729	10.0708	28.0762	48.523	65.0024	92.1631	169.678	152.283
-4.27246	-12.5122	-16.4795	-12.207	-9.15527	-7.32422	-3.66211	0.30518	1.83105	3.35693	9.15527	26.2451	46.9971	61.9507	94.9097	163.574	160.522
-8.23975	-11.5967	-13.7329	-13.4277	-6.40869	-6.40869	-4.88281	-0.91553	1.52588	3.35693	10.6812	23.8037	48.523	58.2886	97.3511	157.166	163.879
-7.32422	-13.4277	-13.4277	-12.8174	-6.40869	-3.35693	-5.18799	-1.52588	0.61035	4.57764	11.2915	25.3296	47.6074	57.9834	101.013	156.25	162.964
-4.27246	-13.7329	-15.2588	-13.1226	-10.376	-5.18799	-5.49316	-0.91553	1.2207	5.79834	10.376	23.8037	46.6919	61.6455	103.455	155.334	158.997
-7.01904	-15.2588	-14.9536	-14.0381	-9.46045	-7.32422	-4.27246	-1.52588	2.13623	4.88281	8.54492	23.8037	46.0815	62.8662	104.065	158.997	156.86
-8.8501	-17.0898	-14.9536	-13.4277	-10.9863	-5.18799	-2.44141	-2.44141	0	5.18799	7.01904	27.771	45.4712	66.5283	101.013	163.879	157.471
-7.01904	-15.564	-15.564	-12.5122	-13.1226	-4.88281	-5.49316	-1.83105	-1.2207	5.49316	8.23975	28.3814	45.166	74.1577	100.403	163.574	169.983
-10.6812	-18.0054	-14.3433	-11.5967	-10.9863	-8.23975	-3.66211	-0.61035	1.52588	2.74658	7.01904	25.6348	41.8091	72.3267	102.539	165.405	179.749
-12.207	-18.6157	-13.1226	-12.207	-12.5122	-4.88281	-2.74658	-3.96729	3.05176	1.52588	6.40869	26.5503	44.2505	69.2749	99.4873	167.847	184.021
-11.2915	-18.3105	-14.9536	-11.9019	-14.3433	-5.79834	-3.66211	-2.74658	2.13623	2.74658	6.10352	25.9399	44.5557	71.4111	95.8252	164.49	185.547
-13.1226	-17.7002	-14.0381	-11.9019	-12.8174	-6.71387	-4.88281	-0.91553	1.83105	3.66211	8.23975	24.7192	44.5557	71.4111	96.4356	165.1	187.988
-12.8174	-18.0054	-13.7329	-12.5122	-10.9863	-7.62939	-5.79834	-3.96729	0	3.66211	8.8501	25.6348	44.5557	70.1904	101.929	169.678	185.852
-8.8501	-15.8691	-17.395	-12.8174	-12.207	-5.49316	-5.49316	-1.52588	2.44141	4.57764	8.8501	22.8882	45.4712	68.9697	103.76	169.983	178.528
-10.6812	-18.0054	-17.395	-14.9536	-11.9019	-8.23975	-6.10352	1.2207	3.66211	3.35693	7.62939	18.0054	43.335	68.3594	104.065	168.152	177.612
-11.5967	-15.8691	-15.564	-13.4277	-10.376	-8.23975	-6.10352	-1.52588	1.52588	3.05176	6.71387	21.3623	41.5039	68.0542	101.929	165.71	183.411
-10.0708	-17.0898	-15.2588	-13.1226	-12.5122	-5.18799	-5.18799	-3.35693	0.30518	3.35693	8.23975	23.8037	43.0298	71.106	94.2993	163.879	191.345
-10.0708	-17.395	-16.7847	-13.4277	-11.2915	-8.54492	-6.40869	-1.83105	0.61035	3.05176	8.8501	18.3105	45.7764	68.9697	87.8906	166.016	194.397
-10.376	-16.1743	-13.1226	-14.0381	-7.01904	-7.32422	-6.40869	-3.05176	-0.30518	4.27246	8.54492	20.1416	47.3023	70.8008	83.6182	173.95	187.073
-9.15527	-16.4795	-15.2588	-13.4277	-11.5967	-7.32422	-4.57764	-4.27246	-1.52588	4.57764	8.54492	25.3296	43.0298	73.8525	80.5664	179.138	175.476
-7.93457	-14.6484	-16.4795	-12.207	-12.207	-7.32422	-3.96729	-1.2207	0.91553	3.35693	7.62939	25.6348	41.8091	74.7681	76.5991	178.223	168.457
-9.76563	-15.564	-14.6484	-12.5122	-8.8501	-7.93457	-4.57764	-2.44141	1.2207	3.66211	5.49316	27.1606	43.0298	74.1577	78.125	179.138	162.354
-9.46045	-14.6484	-14.3433	-12.207	-9.46045	-5.79834	-2.74658	-3.05176	-0.30518	4.27246	7.62939	27.4658	41.1987	78.4302	84.2285	172.729	153.503
-8.54492	-13.7329	-14.0381	-11.9019	-9.46045	-5.79834	-4.88281	0	-0.30518	3.66211	5.49316	23.8037	39.6728	84.8389	91.5527	164.795	146.179
-10.0708	-14.3433	-14.3433	-12.5122	-8.54492	-7.32422	-5.18799	0.61035	-1.52588	3.05176	6.40869	22.8882	39.6728	86.0596	94.9097	163.574	140.686
-11.5967	-12.5122	-15.564	-10.376	-8.8501	-6.10352	-4.27246	-2.74658	0	3.96729	6.10352	26.8555	40.2832	86.3648	100.098	165.405	133.057
-11.2915	-13.1226	-16.7847	-12.207	-10.9863	-7.32422	-3.66211	-0.91553	0.91553	3.35693	6.40869	24.7192	40.2832	86.6699	102.539	165.71	129.395
-12.8174	-11.9019	-13.4277	-12.207	-7.93457	-6.71387	-4.57764	-0.30518	0.61035	3.05176	7.93457	23.8037	41.5039	81.1768	103.455	167.236	129.395
-11.2915	-14.3433	-12.8174	-11.2915	-6.71387	-7.32422	-4.88281	-3.05176	0.61035	3.96729	6.71387	25.0244	42.1143	78.7353	101.013	169.067	130.615
-6.40869	-14.6484	-17.0898	-12.207	-7.93457	-6.71387	-4.57764	-1.52588	0.30518	3.35693	7.93457	25.0244	41.8091	82.7026	100.098	162.354	131.531
-6.40869	-19.2261	-15.8691	-12.207	-10.0708	-6.71387	-4.57764	-0.30518	0.91553	2.44141	9.15527	25.6348	43.335	82.3975	102.844	155.945	133.057
-5.18799	-19.5312	-13.7329	-12.8174	-9.46045	-3.96729	-1.52588	-1.83105	1.52588	3.66211	9.15527	27.1606	45.166	82.0923	101.929	150.757	133.972
-3.66211	-19.5312	-16.1743	-12.207	-10.9863	-4.27246	-3.05176	-2.44141	0.91553	5.79834	10.376	26.8555	46.3867	85.4492	100.403	144.653	137.329
-5.49316	-20.1416	-15.564	-11.5967	-8.8501	-8.8501	-4.27246	-0.61035	2.44141	4.57764	9.15527	23.8037	49.4385	83.9233	104.675	144.348	148.01
-7.93457	-18.9209	-15.8691	-12.5122	-6.40869	-6.71387	-3.66211	-2.74658	1.52588	7.01904	8.23975	27.4658	51.2695	81.1768	106.812	148.926	158.081
-7.93457	-17.7002	-14.6484	-12.207	-7.93457	-4.57764	-3.05176	0.30518	1.52588	5.79834	10.376	27.771	50.6592	82.3975	105.591	153.809	161.438
-9.76563	-17.7002	-14.3433	-13.1226	-8.54492	-7.01904	-3.35693	3.35693	0.61035	4.88281	9.46045	24.1089	48.523	80.2612	105.286	156.86	172.729
-14.3433	-20.4468	-13.7329	-13.1226	-9.15527	-7.01904	-3.66211	-1.83105	0.91553	5.49316	7.32422	27.4658	47.6074	81.1768	107.117	164.49	178.833
-10.376	-18.0054	-16.7847	-14.0381	-12.5122	-4.57764	-3.96729	-0.30518	0.91553	5.79834	10.6812	27.771	47.3023	86.3648	103.455	165.71	181.885
-9.76563	-16.1743	-16.7847	-14.3433	-11.5967	-5.18799	-3.96729	2.44141	2.74658	3.66211	12.207	25.6348	48.2178	84.2285	101.929	167.236	189.819
-13.1226	-16.4795	-13.4277	-11.2915	-7.93457	-6.40869	-3.05176	-1.83105	2.44141	2.44141	10.6812	26.5503	48.2178	80.8716	101.624	168.457	194.702
-11.5967	-15.564	-16.1743	-10.6812	-9.46045	-3.66211	-3.35693	-3.05176	0.91553	5.18799	12.5122	27.4658	50.354	82.7026	101.013	166.626	190.125
-7.93457	-18.0054	-15.8691	-12.5122	-9.76563	-7.01904	-5.18799	0.30518	0.61035	3.05176	11.2915	23.8037	50.9644	86.0596	103.455	164.795	186.462
-8.54492	-18.9209	-15.564	-13.1226	-8.54492	-8.23975	-2.74658	-1.52588	0.61035	3.66211	8.8501	24.7192	52.7954	84.2285	106.812	165.71	181.58
-9.15527	-19.2261	-17.7002	-10.376	-9.76563	-4.88281	-3.66211	-3.66211	2.44141	3.96729	7.62939	25.9399	51.2695	84.8389	107.727	160.828	177.917
-6.40869	-19.5312	-18.9209	-7.62939	-11.5967	-6.71387	-5.18799	-0.61035	2.44141	3.66211	10.376	22.583	46.9971	83.0078	110.474	154.419	171.509
-9.46045	-19.8364	-14.9536	-8.8501	-10.6812	-6.40869	-3.66211	0.30518	2.44141	6.10352	11.2915	22.583	48.2178	79.3457	112	154.724	169.678
-7.93457	-18.3105	-15.8691	-10.376	-10.6812	-5.18799	-3.35693	0	0.91553	5.79834	10.6812	25.9399	46.3867	75.9888	110.168	148.315	168.457
-6.71387	-17.7002	-17.0898	-11.2915	-11.2915	-4.88281	-4.57764	0	0.91553	6.10352	10.376	21.0571	43.6401	78.125	110.168	137.329	164.49
-11.2915	-20.752	-13.7329	-11.5967	-8.23975	-6.40869	-6.40869	0	0	3.66211	8.8501	20.752	40.8935	75.9888	113.22	137.939	164.795
-10.376	-21.0571	-12.8174	-9.76563	-7.62939	-4.88281	-2.74658	-1.83105	-1.52588	3.35693	9.15527	21.9727	41.8091	75.3784	116.577	141.907	164.185
-10.9863	-18.3105	-14.0381	-9.76563	-9.15527	-7.32422	-3.35693	0.30518	0.91553	3.96729	8.54492	20.752	42.4194	74.1577	116.882	137.939	160.217
-11.2915	-19.2261	-13.4277	-10.0708	-8.8501	-9.46045	-2.74658	-0.61035	1.83105	3.05176	7.62939	19.5312	41.5039	69.8852	115.662	132.141	158.081
-15.564	-20.4468	-14.3433	-12.207	-9.15527	-7.32422	-3.96729	-3.35693	1.83105	3.35693	7.01904	21.9727	42.1143	67.4438	115.051	130.31	148.926
-17.395	-19.2261	-18.0054	-11.9019	-11.5967	-5.18799	-4.57764	-0.30518	2.13623	2.44141	9.76563	23.8037	39.3677	70.1904	114.441	126.038	146.79
-19.2261	-20.4468	-15.2588	-12.5122	-9.76563	-6.71387	-3.66211	0.91553	1.52588	4.27246	7.93457	22.2778	40.8935	67.4438	113.525	124.512	154.114
-22.2778	-22.583	-13.4277	-12.207	-9.15527	-5.79834	-4.57764	-0.30518	3.05176	4.57764	7.93457	23.8037	39.3677	65.0024	112.61	128.784	164.795
-19.8364	-20.1416	-16.7847	-10.9863	-9.15527	-3.66211	-4.88281	-0.30518	0.61035	4.57764	8.8501	22.2778	39.3677	72.0215	115.356	125.427	161.133
-21.6675	-19.8364	-14.3433	-13.1226	-10.376	-6.71387	-4.57764	-0.91553	-0.61035	3.66211	8.54492	19.8364	39.978	70.8008	121.155	120.544	155.64
-21.9727	-20.4468	-13.1226	-10.6812	-8.8501	-5.79834	-4.27246	-3.66211	0.91553	2.74658	7.01904	21.9727	41.1987	67.4438	124.512	116.577	161.133
-23.8037	-20.752	-13.7329	-11.5967	-9.15527	-3.66211	-4.88281	-3.35693	3.05176	3.35693	7.93457	23.8037	43.0298	72.3267	126.038	109.863	168.457
-25.3296	-20.752	-13.1226	-9.46045	-10.376	-7.01904	-4.57764	-1.2207	1.2207	2.44141	10.0708	21.3623	40.8935	71.7163	131.836	104.065	175.171
-28.0762	-22.2778	-15.564	-9.46045	-8.8501	-7.32422	-4.88281	-1.83105	0.61035	3.35693	7.32422	22.583	44.5557	66.5283	138.55	107.117	181.885
-25.3296	-18.6157	-19.2261	-10.0708	-10.6812	-5.49316	-5.49316	-1.2207	0.30518	3.96729	7.32422	24.7192	44.5557	68.0542	144.348	102.844	189.209
-22.8882	-17.395	-18.0054	-10.376	-10.0708	-7.01904	-5.49316	0.30518	0.91553	4.27246	8.8501	21.9727	46.6919	65.918	149.231	96.1304	193.787
-26.5503	-18.0054	-15.2588	-11.9019	-7.93457	-6.40869	-3.96729	1.2207	0.30518	3.35693	7.62939	21.6675	45.7764	63.1714	152.893	104.98	196.228
-27.1606	-17.0898	-16.7847	-13.1226	-9.15527	-3.05176	-2.44141	-1.52588	1.2207	6.71387	8.54492	23.4985	46.6919	62.8662	152.893	111.084	196.533
-26.5503	-16.1743	-14.3433	-14.6484	-9.46045	-5.49316	-3.05176	-1.2207	0.30518	4.88281	9.46045	22.583	45.4712	61.9507	151.978	115.051	197.754
-27.771	-20.1416	-12.5122	-12.8174	-10.6812	-5.79834	-1.2207	-3.35693	-0.30518	4.57764	7.93457	23.4985	46.6919	56.7627	149.536	121.155	198.975
-26.5503	-20.752	-14.3433	-12.5122	-9.46045	-3.66211	-3.96729	-2.44141	2.74658	5.18799	7.93457	26.8555	49.1333	55.542	146.484	131.836	199.89
-24.7192	-20.4468	-16.1743	-13.1226	-10.376	-7.93457	-6.10352	-0.61035	1.83105	3.96729	10.0708	24.7192	50.0488	57.9834	140.686	136.414	198.669
-25.6348	-18.6157	-14.6484	-12.8174	-8.23975	-9.76563	-4.57764	-1.83105	1.52588	3.96729	11.2915	22.583	52.4902	51.5747	140.076	135.193	195.312
-25.3296	-18.6157	-15.8691	-11.2915	-10.0708	-5.79834	-4.27246	-2.74658	0	4.88281	8.8501	24.1089	51.8799	53.1006	133.362	135.193	194.092
-19.5312	-15.2588	-16.7847	-12.8174	-10.9863	-3.96729	-6.40869	-2.13623	-0.61035	2.13623	8.23975	23.1934	52.7954	55.542	133.667	136.719	195.007
-21.9727	-15.8691	-15.564	-13.1226	-8.54492	-8.23975	-5.18799	-0.30518	-1.52588	3.05176	7.93457	22.2778	54.0161	57.373	133.972	138.855	204.773
-22.583	-16.4795	-11.9019	-11.9019	-10.9863	-5.79834	-3.05176	-3.35693	-0.30518	5.79834	7.32422	25.3296	52.1851	61.0352	132.446	141.296	216.98
-18.6157	-12.5122	-13.4277	-12.5122	-9.46045	-5.49316	-5.79834	-2.44141	1.52588	3.96729	8.8501	23.8037	53.1006	65.918	130.92	142.517	225.525
-16.1743	-13.1226	-13.4277	-11.9019	-8.54492	-7.93457	-3.96729	-0.30518	0	1.52588	10.0708	19.8364	51.5747	66.8335	130.92	138.855	233.765
-16.1743	-12.5122	-12.5122	-10.9863	-8.8501	-5.49316	-3.05176	-1.2207	3.05176	5.49316	9.76563	21.0571	54.6265	68.3594	131.531	141.296	238.342
-14.9536	-10.0708	-14.3433	-10.9863	-8.54492	-6.10352	-3.66211	-1.83105	1.83105	5.49316	10.0708	22.2778	51.8799	68.9697	129.395	137.329	239.258
-13.7329	-9.46045	-12.5122	-11.5967	-7.93457	-7.62939	-5.49316	-0.30518	-1.2207	2.44141	12.5122	22.2778	53.1006	65.6128	126.038	131.226	238.647
-16.1743	-12.8174	-12.8174	-13.7329	-8.23975	-7.01904	-4.88281	-1.83105	1.2207	3.35693	10.9863	24.7192	55.8472	64.6973	122.375	132.141	243.225
-14.9536	-12.207	-14.3433	-12.207	-8.23975	-4.57764	-3.66211	-0.30518	1.52588	4.27246	12.8174	26.5503	56.1523	68.6646	119.324	128.479	246.277
-15.2588	-11.9019	-13.7329	-12.5122	-7.93457	-8.54492	-4.88281	0.30518	0.61035	2.44141	11.5967	24.7192	57.0679	68.3594	122.681	126.038	249.329
-19.5312	-11.2915	-12.5122	-10.0708	-8.8501	-7.93457	-4.27246	-3.66211	0.30518	3.96729	8.54492	25.0244	58.8989	67.4438	125.122	123.901	246.277
-16.1743	-8.8501	-12.207	-10.6812	-8.23975	-6.71387	-6.10352	-3.66211	1.52588	3.96729	10.376	25.9399	59.8145	69.8852	126.953	126.038	241.699
-17.395	-6.10352	-12.8174	-11.2915	-9.15527	-8.23975	-3.96729	0.61035	0.30518	3.66211	11.2915	25.3296	55.8472	71.7163	129.089	128.479	240.479
-20.752	-8.23975	-11.2915	-11.2915	-7.93457	-7.32422	-3.05176	-0.91553	0.61035	4.27246	9.15527	24.1089	56.7627	70.1904	131.836	128.784	240.479
-21.3623	-10.376	-13.4277	-10.376	-7.32422	-6.10352	-4.27246	-3.66211	1.83105	5.18799	8.23975	26.5503	59.2041	73.2422	129.089	125.427	241.089
-18.3105	-8.23975	-15.2588	-10.0708	-9.15527	-7.62939	-5.49316	-1.2207	0.30518	3.35693	8.54492	23.4985	58.2886	76.5991	133.667	127.258	238.647
-21.0571	-10.6812	-13.4277	-10.0708	-9.15527	-7.32422	-3.66211	-1.2207	0.30518	3.05176	6.40869	23.8037	60.4248	76.5991	139.16	139.465	237.122
-21.3623	-11.2915	-12.207	-10.6812	-8.8501	-4.57764	-3.66211	-2.44141	1.2207	4.27246	9.15527	24.7192	57.373	77.5147	138.55	150.757	233.154
-15.2588	-10.0708	-13.4277	-11.5967	-8.54492	-5.49316	-5.79834	0	1.2207	2.44141	10.6812	21.3623	56.4575	79.9561	137.939	151.672	238.342
-19.2261	-9.15527	-12.5122	-10.0708	-8.23975	-7.32422	-3.96729	0	1.52588	3.66211	7.93457	21.9727	54.3213	75.9888	136.414	152.588	244.141
-21.0571	-9.15527	-11.9019	-7.62939	-5.79834	-3.66211	-1.83105	-2.74658	2.74658	4.27246	9.76563	22.583	52.7954	75.3784	137.329	155.945	245.972
-19.2261	-9.15527	-13.1226	-7.93457	-6.10352	-4.88281	-1.83105	-1.2207	1.52588	2.74658	10.376	21.6675	47.6074	80.2612	138.55	152.893	245.056
-21.3623	-10.0708	-12.5122	-10.6812	-9.46045	-8.8501	-3.66211	-0.61035	0	3.35693	9.76563	20.4468	46.6919	79.6509	139.771	148.315	243.225
-21.6675	-10.376	-14.6484	-11.5967	-8.54492	-4.27246	-4.27246	-3.66211	3.35693	5.18799	10.376	24.4141	44.5557	81.1768	140.686	144.958	240.784
-18.3105	-8.23975	-14.0381	-10.9863	-7.62939	-4.27246	-3.96729	-1.83105	0.91553	5.18799	9.76563	24.4141	41.5039	80.8716	140.991	138.245	239.868
-18.6157	-9.46045	-12.5122	-11.5967	-5.49316	-6.40869	-3.96729	0	-1.2207	5.18799	9.15527	23.1934	41.1987	81.4819	143.433	133.667	242.004
-19.5312	-10.6812	-14.6484	-11.2915	-5.79834	-4.27246	-1.52588	0.91553	1.2207	7.01904	9.46045	26.5503	40.2832	80.2612	142.822	130.615	242.004
-15.564	-8.54492	-15.8691	-10.376	-6.40869	-5.49316	-2.44141	-3.35693	2.74658	4.27246	10.6812	25.0244	40.5884	82.7026	142.212	123.291	242.615
-17.7002	-10.6812	-15.2588	-13.4277	-3.96729	-7.62939	-2.74658	-0.30518	1.52588	3.96729	9.46045	25.9399	42.7246	82.3975	140.991	121.46	242.31
-19.5312	-12.5122	-13.1226	-11.9019	-6.10352	-4.27246	-3.66211	-3.35693	0.61035	6.10352	8.23975	27.771	42.1143	83.0078	138.55	127.258	236.511
-17.7002	-11.9019	-14.0381	-8.8501	-6.40869	-4.88281	-4.57764	-1.2207	1.83105	3.96729	8.54492	26.5503	37.5366	88.501	137.024	136.414	234.985
-16.7847	-13.1226	-11.9019	-8.8501	-6.40869	-8.23975	-4.27246	0.61035	1.52588	4.57764	9.46045	24.4141	37.5366	87.8906	135.498	140.381	232.544
-17.7002	-14.9536	-9.76563	-10.0708	-5.49316	-7.93457	-3.35693	-3.66211	2.44141	5.18799	6.40869	25.3296	39.6728	88.8062	132.141	145.264	237.122
-13.4277	-11.5967	-11.2915	-9.46045	-5.18799	-5.49316	-3.35693	0	2.13623	5.49316	8.23975	24.1089	35.0952	90.332	127.869	145.874	243.53
-10.9863	-10.6812	-11.2915	-12.5122	-7.93457	-8.8501	-4.88281	2.44141	0	3.05176	8.8501	21.3623	33.2642	90.6372	125.427	142.822	247.803
-14.3433	-8.8501	-11.5967	-12.5122	-6.71387	-7.01904	-3.35693	0.91553	2.13623	4.88281	7.32422	22.583	34.79	86.9751	127.563	144.348	251.465
-9.15527	-8.8501	-12.5122	-12.5122	-7.32422	-3.35693	-3.66211	-2.44141	3.66211	4.27246	8.54492	25.9399	33.5693	91.5527	127.869	147.705	250.549
-7.32422	-7.62939	-9.46045	-11.2915	-6.71387	-7.93457	-5.79834	-3.05176	0.91553	2.13623	7.01904	24.4141	32.0435	96.7407	126.038	145.874	239.563
-9.46045	-9.76563	-7.62939	-10.6812	-7.93457	-7.62939	-3.35693	-2.74658	-1.2207	2.74658	7.01904	24.4141	35.7056	93.689	124.207	138.55	225.22
-7.62939	-8.54492	-10.6812	-10.0708	-7.62939	-4.88281	-2.74658	-3.05176	1.52588	3.96729	9.76563	25.0244	34.4849	97.6562	123.596	133.667	220.642
-6.10352	-9.76563	-11.2915	-10.6812	-8.23975	-6.71387	-5.49316	0.91553	0.91553	3.05176	12.5122	25.6348	32.0435	96.1304	122.986	130.615	219.116
-8.54492	-15.2588	-8.23975	-11.9019	-7.93457	-7.32422	-3.66211	0.30518	1.2207	5.18799	7.62939	27.4658	32.6538	91.8579	123.291	130.92	217.896
-7.93457	-12.5122	-9.76563	-9.46045	-6.10352	-6.10352	-2.44141	-1.52588	4.57764	4.88281	8.23975	28.3814	30.8227	92.1631	119.934	137.329	211.792
-2.13623	-13.4277	-11.2915	-11.2915	-8.23975	-6.71387	-3.96729	-0.91553	2.44141	0	10.9863	28.3814	33.5693	90.6372	118.713	141.602	193.481
-3.35693	-12.5122	-9.76563	-12.207	-8.54492	-8.23975	-3.96729	-1.83105	-1.83105	3.05176	7.32422	26.2451	36.9263	87.5854	119.019	141.907	175.476
-3.35693	-13.7329	-7.62939	-11.2915	-8.8501	-6.10352	-2.74658	-3.66211	-1.2207	6.10352	7.62939	30.2124	37.2315	85.7544	121.155	147.095	163.879
-3.66211	-9.15527	-7.32422	-11.5967	-7.62939	-8.8501	-5.49316	0.30518	1.83105	4.88281	9.76563	30.8227	34.79	85.144	121.46	151.062	157.776
-7.01904	-9.76563	-7.62939	-10.376	-8.54492	-10.0708	-5.18799	1.2207	0.61035	4.27246	10.376	28.3814	37.2315	80.8716	119.019	159.607	151.062
-8.23975	-14.0381	-5.18799	-8.54492	-10.376	-6.10352	-3.35693	-3.66211	1.83105	5.18799	9.46045	29.2969	38.4522	77.8198	121.765	172.729	151.978
-5.79834	-10.376	-8.23975	-8.54492	-9.76563	-5.79834	-4.27246	-1.83105	0.30518	3.66211	7.93457	28.0762	35.7056	77.2095	118.713	175.171	161.743
-6.10352	-10.6812	-7.93457	-12.5122	-9.46045	-7.93457	-4.57764	0	-1.52588	3.66211	7.62939	26.5503	37.2315	75.9888	117.493	174.866	167.542
-7.62939	-12.207	-7.93457	-11.5967	-8.8501	-7.62939	-4.27246	-1.83105	0.61035	4.27246	9.15527	28.6865	36.6211	73.2422	118.408	178.223	170.593
-7.93457	-10.9863	-8.23975	-11.5967	-9.15527	-6.71387	-4.57764	-2.44141	-0.30518	1.83105	13.4277	25.6348	31.1279	78.4302	122.681	173.035	166.016
-10.9863	-10.9863	-8.23975	-10.0708	-8.54492	-9.46045	-5.18799	-0.30518	1.2207	1.52588	10.6812	24.1089	30.8227	79.3457	123.291	167.542	160.522
-13.1226	-11.9019	-5.49316	-9.46045	-8.8501	-9.46045	-3.96729	-1.52588	1.2207	4.27246	9.15527	24.1089	31.1279	78.4302	118.713	172.119	151.672
-14.9536	-10.9863	-7.32422	-10.0708	-8.23975	-7.93457	-5.18799	-3.35693	1.83105	2.74658	10.6812	27.4658	31.1279	82.3975	113.831	174.866	144.348
-17.395	-10.0708	-10.0708	-10.0708	-7.32422	-9.46045	-3.66211	0.30518	0	2.74658	8.23975	26.2451	31.4331	85.144	107.727	171.204	145.264
-21.0571	-12.8174	-10.0708	-11.2915	-8.8501	-6.71387	-4.57764	-1.52588	-0.30518	1.2207	8.54492	26.2451	33.5693	83.9233	102.234	163.879	152.283
-20.4468	-10.376	-11.2915	-10.9863	-8.8501	-4.88281	-3.35693	-0.30518	2.74658	2.13623	12.8174	26.8555	31.4331	83.0078	99.1821	156.25	158.997
-18.9209	-10.9863	-9.76563	-11.9019	-9.15527	-8.54492	-5.18799	0.30518	0.61035	1.83105	11.9019	24.4141	31.7383	82.3975	97.6562	151.978	160.217
-23.4985	-12.8174	-7.93457	-11.9019	-9.46045	-9.46045	-4.57764	-2.74658	1.52588	4.27246	10.376	23.8037	34.4849	77.5147	98.2666	150.146	161.743
-22.8882	-10.9863	-10.0708	-11.2915	-8.54492	-4.27246	-5.18799	-3.66211	4.27246	2.44141	11.9019	23.8037	35.7056	78.7353	96.4356	153.198	167.847
-25.0244	-10.376	-9.76563	-9.46045	-7.62939	-6.10352	-6.10352	-0.30518	1.83105	1.2207	10.9863	24.1089	35.7056	79.6509	92.4683	150.757	179.138
-27.771	-10.376	-8.54492	-11.5967	-7.32422	-10.376	-4.88281	-0.91553	1.2207	2.74658	9.46045	25.0244	37.8418	79.9561	90.332	149.231	187.073
-25.9399	-11.5967	-10.0708	-11.9019	-6.10352	-6.71387	-4.88281	-2.13623	3.66211	2.74658	10.376	28.6865	36.6211	81.7871	95.8252	152.283	192.566
-21.3623	-8.8501	-9.76563	-11.2915	-5.18799	-7.62939	-6.71387	-0.61035	1.83105	1.2207	10.9863	27.771	32.959	82.0923	99.4873	149.536	192.566
-22.8882	-11.2915	-8.8501	-11.5967	-6.10352	-8.8501	-5.18799	0.30518	-2.44141	1.2207	10.0708	28.0762	36.9263	80.5664	99.4873	150.146	191.65
-22.8882	-13.1226	-10.6812	-9.76563	-7.01904	-6.10352	-2.44141	-2.74658	-0.61035	5.18799	10.9863	30.8227	37.5366	78.4302	99.1821	153.198	190.125
-17.7002	-11.5967	-13.7329	-12.207	-5.18799	-5.79834	-4.57764	-2.74658	-0.91553	1.83105	11.2915	28.6865	36.0107	80.2612	101.929	159.607	188.293
-18.6157	-12.8174	-12.5122	-12.5122	-5.49316	-7.93457	-2.74658	-0.30518	-0.61035	1.83105	9.15527	27.771	38.4522	82.7026	100.708	161.133	185.242
-17.395	-12.207	-11.2915	-10.376	-8.23975	-6.10352	-1.2207	-2.44141	1.52588	3.35693	11.2915	29.9072	36.0107	83.9233	97.0459	157.166	189.819
-16.4795	-11.5967	-14.0381	-8.54492	-7.01904	-7.01904	-5.49316	-1.2207	2.44141	2.13623	11.9019	28.9917	33.8745	86.6699	96.4356	149.841	194.702
-18.9209	-15.2588	-14.0381	-8.8501	-8.8501	-10.0708	-4.57764	0.30518	-0.91553	2.74658	9.76563	27.1606	32.0435	86.6699	93.3838	143.127	190.43
-19.5312	-18.6157	-12.8174	-9.46045	-8.54492	-7.32422	-2.74658	-5.49316	0.91553	3.05176	10.376	26.5503	34.79	87.5854	92.7734	141.296	190.125
-18.9209	-14.0381	-10.6812	-8.23975	-6.10352	-6.10352	-3.96729	-3.35693	2.74658	1.83105	10.9863	26.5503	35.4004	88.8062	93.0786	136.719	191.956
-19.5312	-16.1743	-11.9019	-10.6812	-7.01904	-7.32422	-5.79834	2.44141	0.30518	3.05176	9.46045	26.2451	34.4849	84.2285	97.6562	130.005	192.261
-21.3623	-18.6157	-13.4277	-10.0708	-9.15527	-5.18799	-3.05176	-2.44141	1.52588	6.40869	9.15527	29.2969	35.0952	77.5147	102.844	137.329	193.176
-17.0898	-15.8691	-14.3433	-10.9863	-6.10352	-3.66211	-2.13623	-2.44141	1.52588	4.27246	12.5122	28.3814	33.2642	77.5147	108.032	148.315	199.89
-14.9536	-16.4795	-15.2588	-10.0708	-6.40869	-7.62939	-5.18799	0	-0.61035	1.83105	10.9863	28.9917	33.8745	79.0405	111.084	148.01	205.078
-16.4795	-17.7002	-13.1226	-10.6812	-7.32422	-7.32422	-4.88281	-2.13623	0.30518	3.96729	10.9863	28.3814	35.4004	77.8198	113.525	146.484	205.078
-14.0381	-16.4795	-13.1226	-9.76563	-6.71387	-5.79834	-3.96729	-3.35693	2.13623	2.13623	12.8174	28.3814	33.2642	80.5664	114.441	146.179	207.52
-13.4277	-15.8691	-14.0381	-9.46045	-8.23975	-7.62939	-3.66211	0.30518	0.30518	1.83105	9.46045	29.602	32.6538	78.4302	112.61	141.907	207.214
-14.0381	-19.8364	-13.4277	-11.2915	-8.54492	-8.54492	-3.05176	0	0.91553	3.05176	10.6812	29.2969	36.3159	75.9888	111.694	138.245	205.383
-12.8174	-17.7002	-14.6484	-10.0708	-6.40869	-6.40869	-2.13623	-1.83105	3.05176	3.05176	12.5122	30.5176	33.2642	76.5991	108.948	137.024	209.351
-13.1226	-13.4277	-14.9536	-13.1226	-7.32422	-7.62939	-5.18799	0.91553	0.61035	2.74658	12.207	29.602	29.2969	78.125	103.76	131.226	203.857
-14.6484	-17.395	-13.7329	-12.8174	-8.23975	-8.54492	-4.57764	0.30518	-0.61035	3.96729	12.5122	29.602	33.2642	75.9888	96.4356	126.648	196.533
-11.9019	-16.1743	-11.5967	-11.5967	-8.54492	-5.49316	-3.05176	-2.74658	-0.30518	3.66211	14.6484	31.7383	30.8227	76.2939	88.8062	124.207	197.754
-10.9863	-14.9536	-10.376	-11.9019	-7.01904	-6.40869	-5.79834	-2.74658	1.52588	3.05176	13.4277	32.0435	28.9917	79.9561	82.3975	122.07	198.669
-12.8174	-16.1743	-10.6812	-11.5967	-8.8501	-7.01904	-4.57764	-0.91553	0	6.10352	11.2915	32.3486	28.9917	77.2095	82.3975	126.953	191.345
-12.5122	-16.7847	-11.2915	-10.0708	-7.32422	-6.10352	-2.74658	-2.74658	2.13623	4.27246	13.7329	32.6538	30.5176	76.2939	86.3648	132.446	185.852
-8.8501	-15.8691	-10.9863	-7.32422	-6.40869	-7.32422	-4.27246	-1.2207	2.74658	2.44141	10.9863	34.4849	29.9072	75.3784	83.6182	126.953	183.716
-9.76563	-19.8364	-10.9863	-9.46045	-8.8501	-12.207	-3.96729	0.30518	0.61035	4.27246	10.376	33.2642	31.4331	72.6318	81.4819	125.427	173.34
-8.8501	-21.3623	-12.8174	-9.15527	-10.0708	-8.8501	-0.61035	-3.05176	4.57764	4.57764	14.3433	32.6538	33.5693	73.5474	84.5337	126.953	170.898
-9.15527	-15.8691	-11.9019	-8.54492	-9.76563	-7.32422	-2.74658	-2.13623	2.44141	1.2207	14.9536	32.959	33.5693	77.2095	86.6699	124.207	171.204
-11.9019	-19.5312	-11.2915	-9.76563	-10.376	-8.23975	-5.79834	-1.83105	0.91553	1.83105	10.9863	31.1279	35.0952	78.7353	88.501	117.493	165.71
-12.207	-21.3623	-14.3433	-11.9019	-10.0708	-7.01904	-2.74658	-1.83105	2.74658	6.10352	10.9863	32.959	36.9263	78.4302	92.1631	116.272	155.334
-7.01904	-18.3105	-13.1226	-13.4277	-6.10352	-5.49316	-3.05176	-0.91553	2.13623	3.35693	11.2915	32.0435	37.8418	82.3975	97.0459	116.882	151.978
-7.32422	-19.2261	-11.5967	-14.9536	-6.40869	-7.93457	-3.35693	1.2207	-0.61035	5.18799	9.46045	31.7383	35.0952	84.2285	95.52	119.019	146.79
-7.32422	-20.752	-10.9863	-14.3433	-6.40869	-6.10352	-3.35693	0	0.91553	5.18799	11.2915	32.6538	37.8418	82.7026	97.0459	124.207	140.991
-3.66211	-17.395	-11.9019	-10.9863	-4.88281	-7.32422	-2.13623	-1.2207	3.05176	3.66211	11.9019	34.1797	38.7573	85.144	101.929	130.92	150.146
-5.79834	-18.0054	-9.15527	-13.1226	-8.23975	-10.6812	-4.88281	-0.91553	-0.30518	1.83105	10.9863	32.3486	41.1987	84.8389	104.675	130.31	156.25
-9.76563	-20.752	-9.46045	-15.8691	-9.76563	-7.93457	-4.27246	-1.52588	0.61035	5.18799	12.207	29.9072	42.4194	79.0405	104.065	134.583	159.607
-8.54492	-16.7847	-12.207	-14.0381	-8.54492	-4.88281	-3.66211	-4.57764	0.61035	3.96729	13.7329	29.9072	39.0625	78.7353	101.624	142.517	169.067
-9.15527	-16.1743	-11.2915	-14.3433	-6.71387	-7.62939	-5.18799	-4.57764	0.30518	2.74658	11.9019	30.2124	39.978	74.4629	103.76	141.296	174.255
-10.376	-20.4468	-11.9019	-14.9536	-8.54492	-9.46045	-4.57764	-3.05176	0.91553	5.49316	13.4277	32.0435	41.5039	69.8852	108.948	141.602	173.035
-7.93457	-18.6157	-9.46045	-14.6484	-7.32422	-5.49316	-3.66211	-3.35693	2.44141	2.74658	14.6484	32.6538	41.1987	70.8008	114.441	143.738	170.288
-6.71387	-12.207	-6.40869	-11.5967	-8.23975	-8.23975	-5.18799	-0.91553	0.61035	2.74658	11.9019	33.5693	38.147	71.106	112	136.719	173.035
-7.01904	-12.8174	-5.49316	-14.0381	-8.54492	-8.23975	-5.79834	-3.35693	-2.13623	4.88281	11.5967	33.5693	40.8935	67.1387	107.117	125.427	167.847
-7.32422	-13.4277	-5.18799	-12.207	-7.32422	-5.49316	-5.79834	-7.32422	1.52588	2.13623	12.207	35.0952	39.0625	65.3076	105.286	123.901	173.645
-9.15527	-11.2915	-5.79834	-14.0381	-7.01904	-6.71387	-6.71387	-3.05176	-1.52588	2.13623	11.9019	33.8745	38.4522	65.6128	101.929	119.324	178.833
-11.9019	-13.7329	-6.10352	-15.2588	-10.0708	-7.93457	-5.79834	-1.52588	-1.2207	4.27246	10.6812	31.1279	45.166	61.6455	95.8252	114.746	170.898
-12.5122	-13.1226	-7.01904	-14.6484	-7.01904	-6.71387	-4.27246	-1.83105	1.2207	4.57764	11.9019	30.8227	42.4194	65.0024	93.3838	113.22	170.288
-8.8501	-10.0708	-8.8501	-13.4277	-5.18799	-6.10352	-5.49316	-1.83105	-0.30518	-0.61035	10.9863	29.602	39.6728	71.106	92.4683	111.389	184.326
-11.5967	-11.9019	-8.23975	-14.3433	-9.46045	-7.62939	-4.88281	0.91553	-1.52588	2.74658	9.76563	29.9072	42.4194	71.4111	89.7217	108.032	197.144
-13.4277	-10.6812	-7.32422	-14.3433	-7.01904	-5.79834	-5.18799	-2.13623	-0.30518	4.57764	11.5967	28.6865	45.166	75.9888	93.0786	110.474	203.247
-14.0381	-6.40869	-7.62939	-11.2915	-5.18799	-5.49316	-3.66211	-1.83105	1.2207	2.13623	11.2915	31.4331	42.4194	79.3457	93.9941	111.694	212.402
-17.0898	-8.23975	-6.71387	-13.1226	-6.71387	-8.23975	-2.74658	1.2207	0.61035	4.27246	11.5967	30.8227	44.2505	77.2095	91.8579	106.812	211.182
-12.8174	-11.5967	-4.27246	-14.0381	-7.62939	-6.71387	-1.2207	-2.13623	3.05176	6.10352	13.4277	32.3486	45.7764	77.8198	91.2476	104.675	207.214
-10.0708	-9.76563	-6.40869	-12.8174	-7.62939	-6.40869	-2.44141	-1.83105	1.83105	1.52588	13.1226	30.5176	41.5039	77.8198	94.6045	104.675	207.825
-9.15527	-11.2915	-7.01904	-11.9019	-7.62939	-9.76563	-4.57764	-0.91553	-0.91553	1.2207	9.46045	28.9917	44.5557	78.7353	100.403	102.234	202.637
-10.376	-14.0381	-8.23975	-12.8174	-8.54492	-8.54492	-4.57764	-1.2207	1.2207	2.13623	10.6812	29.2969	45.4712	81.7871	105.591	107.422	196.533
-6.10352	-14.0381	-7.93457	-13.1226	-5.49316	-4.57764	-5.49316	-3.05176	1.52588	0.30518	10.0708	30.5176	43.6401	84.8389	115.967	115.051	197.754
-5.79834	-15.2588	-5.49316	-13.7329	-8.23975	-7.32422	-5.49316	-1.52588	-0.91553	3.66211	8.8501	29.9072	43.9453	83.0078	125.427	114.136	200.195
-9.15527	-17.0898	-5.79834	-15.2588	-9.46045	-7.93457	-3.96729	-1.2207	0.61035	5.49316	11.5967	28.9917	43.0298	79.3457	132.141	105.591	198.059
-6.40869	-13.1226	-5.79834	-13.1226	-5.18799	-4.88281	-4.88281	-3.05176	3.05176	4.88281	10.6812	29.2969	41.1987	79.6509	135.803	97.9614	199.89
-7.01904	-12.5122	-8.23975	-12.5122	-7.01904	-7.32422	-6.10352	-2.13623	0.61035	3.96729	11.2915	28.0762	39.978	80.5664	136.414	93.3838	199.585
-10.0708	-16.4795	-6.40869	-12.5122	-8.8501	-7.01904	-5.18799	-3.66211	2.13623	3.66211	11.2915	28.9917	44.8608	81.7871	139.16	95.2148	203.857
-10.0708	-15.2588	-6.71387	-11.9019	-8.23975	-3.05176	-3.66211	-3.96729	4.27246	2.74658	11.9019	28.6865	39.3677	85.7544	144.348	101.929	214.539
-7.62939	-15.8691	-8.23975	-11.9019	-7.32422	-4.57764	-4.57764	-0.30518	1.83105	2.13623	10.9863	28.3814	39.0625	87.8906	145.569	105.896	219.116
-8.8501	-16.1743	-9.76563	-13.4277	-10.9863	-6.40869	-3.96729	-0.30518	-0.30518	6.10352	10.9863	28.0762	39.978	83.6182	141.296	115.662	220.337
-8.23975	-12.207	-9.46045	-10.9863	-7.93457	-5.18799	-4.57764	-2.44141	3.35693	4.27246	13.7329	27.771	40.5884	83.0078	137.024	122.681	225.525
-4.57764	-11.9019	-9.76563	-10.6812	-7.62939	-6.40869	-3.66211	-0.91553	1.52588	1.83105	10.9863	28.9917	41.5039	86.6699	130.31	127.563	228.577
-8.23975	-16.7847	-9.15527	-12.207	-10.6812	-5.79834	-3.66211	0.61035	-2.44141	5.49316	11.2915	26.8555	42.4194	86.3648	124.512	129.7	225.525
-8.23975	-16.4795	-7.62939	-11.9019	-7.62939	-4.57764	-3.66211	-2.74658	1.52588	3.05176	13.1226	25.3296	41.5039	89.1113	124.207	132.751	224.304
-8.8501	-14.6484	-7.93457	-11.9019	-6.71387	-4.57764	-5.18799	1.52588	0.30518	0.30518	10.9863	22.8882	42.1143	92.7734	126.343	130.92	222.778
-9.76563	-17.0898	-6.71387	-12.5122	-8.8501	-3.96729	-4.88281	0.91553	0	4.57764	9.76563	21.3623	43.6401	86.9751	129.089	121.46	216.064
-11.5967	-16.7847	-4.88281	-11.2915	-7.93457	-2.74658	-3.35693	-2.74658	3.05176	6.40869	13.1226	21.6675	41.5039	86.3648	132.141	115.967	206.909
-8.8501	-12.207	-6.71387	-10.9863	-5.79834	-4.27246	-3.96729	-3.05176	0.61035	5.18799	10.0708	21.9727	39.978	88.1958	133.972	110.168	205.078
-9.76563	-10.376	-6.40869	-13.1226	-8.23975	-6.71387	-3.35693	0.61035	0.30518	5.79834	9.46045	21.3623	42.7246	87.8906	130.005	104.37	203.857
-11.9019	-9.15527	-5.79834	-14.9536	-9.15527	-6.71387	-3.35693	-2.44141	1.2207	4.27246	14.6484	22.8882	43.9453	87.5854	127.869	99.4873	205.078
-9.46045	-7.62939	-4.88281	-12.8174	-8.8501	-6.10352	-3.66211	-2.44141	1.2207	3.05176	11.5967	23.8037	40.8935	87.8906	123.291	93.689	211.792
-9.15527	-10.0708	-4.88281	-13.7329	-11.2915	-8.8501	-4.88281	2.74658	-2.44141	5.18799	11.5967	23.4985	39.6728	86.9751	122.07	86.6699	205.994
-6.71387	-10.0708	-7.01904	-13.7329	-8.8501	-7.01904	-5.49316	0.30518	0.61035	5.18799	12.8174	23.4985	40.2832	84.8389	121.155	83.313	193.176
-9.46045	-6.71387	-10.376	-12.8174	-6.71387	-6.40869	-4.27246	-1.83105	3.05176	3.66211	11.5967	25.3296	37.2315	87.5854	116.882	87.2803	187.683
-11.2915	-8.8501	-11.2915	-17.7002	-7.32422	-7.93457	-5.18799	-0.61035	0.61035	2.74658	10.6812	25.9399	39.978	85.7544	110.168	89.1113	187.683
-13.4277	-10.9863	-10.376	-16.4795	-10.0708	-3.96729	-4.27246	-3.05176	1.83105	6.10352	10.376	25.3296	40.5884	84.2285	107.117	90.0269	183.411
-14.3433	-6.10352	-10.0708	-12.8174	-9.46045	-5.49316	-5.18799	-5.79834	3.66211	1.2207	12.207	26.8555	37.2315	87.2803	104.37	91.5527	183.716
-13.7329	-7.93457	-9.76563	-11.9019	-9.76563	-7.93457	-3.66211	-3.96729	0.30518	0.30518	9.46045	25.9399	39.3677	85.7544	100.708	92.7734	186.462
-18.3105	-7.32422	-10.376	-12.8174	-10.6812	-6.71387	-3.96729	0	-2.13623	4.57764	11.5967	27.771	39.978	84.5337	96.1304	99.1821	190.43
-15.8691	-4.88281	-10.0708	-10.6812	-7.01904	-5.49316	-4.27246	-1.83105	1.83105	1.83105	9.76563	28.3814	35.0952	87.8906	90.332	107.422	202.332
-17.395	-4.57764	-9.15527	-10.376	-7.32422	-7.62939	-4.27246	0.91553	0.30518	3.05176	8.8501	25.3296	32.0435	89.1113	83.0078	112.915	213.318
-18.0054	-7.32422	-11.2915	-12.5122	-8.54492	-8.23975	-4.88281	0	1.83105	4.27246	10.376	25.0244	33.5693	88.1958	79.9561	115.051	217.896
-14.9536	-6.40869	-9.15527	-12.207	-7.32422	-6.10352	-5.18799	-3.05176	6.10352	4.57764	9.76563	28.0762	31.1279	94.6045	82.0923	114.136	224.304
-14.9536	-4.57764	-9.76563	-12.5122	-7.32422	-7.32422	-6.10352	-0.91553	3.05176	1.52588	6.71387	26.2451	26.8555	97.9614	87.5854	112.915	231.323
-15.564	-9.15527	-9.15527	-14.6484	-9.46045	-9.15527	-3.96729	-1.2207	0	5.49316	8.23975	24.7192	27.771	98.5718	90.6372	112.61	238.037
-15.8691	-8.23975	-7.62939	-13.7329	-8.23975	-5.79834	-4.88281	-2.74658	0.61035	2.13623	11.2915	23.8037	25.6348	106.201	93.0786	120.85	242.615
-12.8174	-9.15527	-7.32422	-12.207	-6.71387	-2.74658	-3.66211	-1.2207	0.30518	-0.91553	9.46045	26.5503	22.583	108.948	93.9941	121.46	249.634
-11.2915	-14.0381	-6.71387	-13.1226	-10.9863	-7.62939	-3.35693	2.44141	-0.30518	4.88281	11.5967	27.1606	23.4985	105.591	90.6372	122.986	248.413
-12.5122	-14.6484	-4.57764	-14.0381	-10.0708	-6.10352	-2.74658	-2.13623	1.2207	4.27246	12.8174	27.1606	23.1934	106.201	88.1958	128.784	245.056
-10.376	-13.7329	-5.79834	-13.7329	-10.0708	-4.88281	-5.79834	-3.35693	0.30518	2.74658	10.0708	27.1606	20.752	106.812	84.5337	133.667	244.141
-8.8501	-16.4795	-6.71387	-16.1743	-12.5122	-6.71387	-5.79834	0.30518	0	3.05176	7.93457	21.9727	22.2778	100.708	78.7353	130.92	243.225
-7.93457	-19.2261	-5.18799	-15.8691	-10.376	-7.32422	-5.18799	-2.44141	3.35693	4.57764	10.9863	24.4141	24.1089	94.6045	76.5991	131.836	242.31
-7.01904	-14.6484	-4.27246	-14.6484	-7.62939	-7.62939	-4.57764	-1.2207	1.83105	0.61035	8.54492	23.1934	21.3623	94.2993	78.7353	134.277	231.934
-6.40869	-19.2261	-4.57764	-12.8174	-10.0708	-7.93457	-3.96729	-1.83105	-1.2207	3.05176	7.93457	21.3623	24.4141	87.8906	79.6509	128.174	226.44
-6.71387	-18.9209	-5.79834	-13.4277	-9.15527	-7.01904	-7.01904	-3.66211	0.30518	4.27246	13.1226	23.4985	25.6348	85.4492	83.0078	119.019	221.863
-7.62939	-16.1743	-5.18799	-14.0381	-5.79834	-4.88281	-5.18799	-5.79834	2.44141	1.2207	11.2915	22.2778	25.3296	85.4492	87.2803	111.389	226.44
-9.46045	-17.7002	-5.79834	-13.4277	-9.46045	-6.71387	-3.66211	-1.2207	1.2207	1.2207	12.207	19.5312	27.1606	84.5337	85.144	102.234	226.44
-8.54492	-16.7847	-6.71387	-16.4795	-13.1226	-7.01904	-4.88281	-0.30518	1.52588	0.61035	14.6484	20.752	28.3814	86.0596	87.5854	92.1631	215.454
-6.40869	-16.4795	-4.88281	-11.9019	-8.23975	-4.88281	-4.57764	-1.83105	2.13623	1.2207	13.4277	22.583	23.4985	93.689	89.4165	93.0786	205.688
-7.93457	-14.9536	-6.71387	-13.4277	-9.15527	-6.40869	-5.49316	1.52588	-0.30518	2.44141	10.9863	20.1416	26.5503	93.9941	88.8062	94.9097	194.702
-7.62939	-18.6157	-5.79834	-15.564	-11.2915	-6.71387	-6.40869	-0.30518	1.83105	5.49316	14.9536	19.5312	29.2969	89.1113	90.6372	95.8252	184.631
-7.93457	-13.4277	-4.88281	-14.6484	-9.46045	-6.10352	-6.71387	-1.83105	1.52588	3.96729	16.4795	21.3623	27.4658	90.332	90.9424	101.624	176.697
-6.40869	-12.207	-5.49316	-14.0381	-9.15527	-7.01904	-4.57764	-1.52588	0.30518	1.83105	13.7329	20.1416	27.771	88.1958	89.1113	102.844	169.373
-5.49316	-13.4277	-2.74658	-14.6484	-12.207	-7.01904	-4.27246	-3.35693	-0.91553	4.27246	15.564	20.4468	26.8555	83.9233	85.7544	97.6562	156.86
-7.01904	-9.15527	-3.05176	-14.9536	-10.6812	-6.40869	-6.10352	-5.18799	0.91553	0.30518	15.2588	22.2778	24.1089	85.144	83.6182	96.7407	160.522
-7.01904	-10.0708	-4.27246	-13.1226	-10.376	-6.40869	-6.10352	-1.2207	-2.44141	1.83105	12.5122	22.2778	26.2451	85.144	83.313	99.7925	171.509
-7.01904	-12.8174	-5.18799	-14.0381	-10.0708	-8.54492	-6.40869	-0.91553	-0.91553	5.18799	13.7329	20.4468	31.1279	82.7026	85.7544	101.624	177.612
-5.18799	-11.5967	-5.18799	-11.9019	-7.93457	-5.79834	-5.79834	-3.96729	1.2207	3.66211	13.4277	20.1416	27.4658	83.9233	92.1631	106.506	182.19
-7.01904	-8.8501	-3.96729	-12.8174	-7.01904	-4.27246	-3.96729	-2.44141	0.61035	1.52588	10.376	18.0054	27.1606	82.7026	95.8252	106.506	186.768
-12.5122	-10.0708	-5.18799	-14.9536	-10.6812	-4.88281	-3.35693	-2.74658	-0.30518	4.88281	12.8174	17.395	30.8227	77.2095	96.7407	101.929	191.04
-13.4277	-9.46045	-5.79834	-12.207	-9.46045	-6.10352	-3.96729	-0.91553	2.13623	6.10352	18.0054	15.8691	31.4331	75.9888	101.318	99.4873	194.092
-13.7329	-9.46045	-5.79834	-10.9863	-7.93457	-4.27246	-5.49316	-1.2207	4.27246	0.91553	12.5122	14.9536	33.5693	75.9888	106.812	90.6372	196.838
-16.1743	-9.76563	-7.32422	-14.9536	-10.0708	-6.10352	-3.66211	0	0.91553	4.57764	11.9019	15.2588	35.4004	74.7681	109.863	77.8198	194.702
-15.2588	-8.8501	-5.79834	-14.9536	-9.15527	-4.57764	-5.49316	-0.91553	1.52588	1.83105	13.1226	14.3433	33.8745	78.125	112.305	70.8008	182.495
-16.7847	-4.57764	-5.49316	-13.4277	-9.15527	-2.44141	-4.57764	-1.83105	1.83105	-0.61035	12.5122	14.0381	32.3486	78.125	115.051	78.4302	173.645
-18.3105	-2.44141	-5.79834	-14.3433	-10.0708	-5.79834	-3.05176	-0.30518	-1.83105	3.66211	11.5967	14.6484	37.8418	73.2422	118.408	89.1113	172.119
-19.2261	-3.35693	-5.79834	-14.6484	-9.76563	-6.40869	-3.35693	-1.52588	2.13623	3.96729	13.4277	14.9536	38.7573	68.3594	121.765	99.1821	178.223
-19.2261	-2.13623	-5.18799	-12.8174	-5.49316	-5.79834	-3.96729	-3.35693	3.66211	2.13623	11.2915	13.4277	36.6211	67.4438	121.46	105.896	180.054
-18.3105	-3.35693	-6.71387	-12.5122	-8.8501	-6.10352	-3.66211	-1.83105	-0.30518	4.27246	7.32422	13.1226	39.3677	63.4766	119.934	108.337	171.509
-18.6157	-3.66211	-7.01904	-13.4277	-10.6812	-6.40869	-4.88281	-0.30518	0.30518	5.49316	11.5967	13.1226	39.3677	60.4248	119.019	114.136	159.302
-21.3623	-2.13623	-6.40869	-12.207	-9.15527	-6.71387	-3.96729	-3.05176	2.44141	3.05176	10.9863	12.207	39.978	65.6128	119.934	123.901	152.893
-17.395	-4.88281	-8.54492	-11.9019	-8.23975	-8.23975	-3.66211	0.30518	0.91553	4.88281	10.376	13.1226	40.2832	68.0542	119.019	130.31	149.841
-16.4795	-6.40869	-10.0708	-11.9019	-8.54492	-7.62939	-3.66211	0.91553	0.61035	6.71387	12.8174	12.8174	38.4522	69.5801	118.408	142.822	149.841
-18.0054	-5.18799	-10.9863	-12.207	-6.10352	-4.27246	-3.66211	-2.44141	2.74658	2.74658	8.54492	14.3433	35.7056	75.6836	118.713	151.672	153.809
-19.8364	-7.01904	-10.376	-12.207	-6.40869	-5.49316	-2.74658	-0.30518	0.30518	1.52588	7.93457	15.8691	36.9263	76.9043	117.493	148.315	151.672
-17.395	-9.76563	-10.376	-13.7329	-8.8501	-5.18799	-3.96729	-0.61035	1.2207	5.79834	10.376	16.7847	35.0952	73.8525	117.188	138.55	150.757
-17.395	-10.0708	-9.76563	-11.9019	-6.10352	-4.27246	-4.88281	-2.44141	4.27246	4.27246	10.6812	16.7847	29.9072	76.5991	118.103	136.414	155.029
-17.0898	-8.8501	-10.0708	-13.1226	-7.32422	-5.79834	-3.05176	-1.52588	3.05176	4.27246	9.76563	14.9536	31.7383	77.8198	117.188	133.362	158.386
-12.5122	-11.2915	-12.207	-12.8174	-10.376	-5.79834	-0.91553	-0.61035	0.61035	7.32422	10.6812	13.1226	31.1279	76.5991	118.408	124.817	160.828
-11.9019	-9.46045	-9.15527	-11.9019	-9.46045	-4.57764	-2.74658	-2.74658	2.74658	6.10352	10.376	13.4277	28.6865	76.9043	120.85	119.324	162.354
-14.9536	-7.62939	-10.376	-10.0708	-8.54492	-3.05176	-1.83105	-2.13623	3.05176	3.35693	8.8501	13.7329	27.4658	75.6836	120.239	121.155	160.522
-14.6484	-9.46045	-13.7329	-12.5122	-10.376	-4.57764	-4.27246	0.30518	0	4.88281	11.2915	13.1226	29.9072	70.4956	112	128.174	157.776
-13.7329	-7.93457	-11.9019	-11.9019	-8.23975	-3.66211	-5.49316	-3.66211	1.52588	5.18799	10.376	14.6484	27.4658	71.4111	110.168	129.7	159.607
-14.9536	-8.8501	-10.6812	-12.5122	-6.71387	-5.49316	-3.66211	-0.91553	1.52588	3.35693	6.40869	12.5122	28.9917	75.3784	108.032	131.531	164.185
-11.9019	-10.9863	-13.1226	-14.3433	-10.376	-5.79834	-1.52588	3.35693	-0.91553	3.66211	8.8501	12.5122	31.7383	71.4111	107.117	131.531	169.373
-12.207	-9.76563	-11.9019	-13.4277	-8.54492	-3.66211	-3.35693	1.83105	1.2207	2.44141	10.9863	14.0381	27.4658	70.1904	110.168	132.446	167.847
-14.9536	-4.88281	-11.2915	-13.7329	-7.32422	-4.57764	-5.18799	-0.91553	3.05176	1.83105	9.15527	15.2588	27.771	69.5801	112.915	130.31	172.729
-14.3433	-8.8501	-11.9019	-14.6484	-9.76563	-5.49316	-3.96729	1.52588	0	6.10352	10.6812	14.3433	28.3814	63.4766	112.61	120.544	180.054
-14.3433	-7.32422	-11.5967	-14.0381	-10.0708	-6.40869	-5.18799	-0.61035	0.91553	4.57764	12.8174	11.2915	23.8037	62.2559	115.051	113.831	176.392
-16.4795	-4.57764	-12.5122	-9.46045	-7.93457	-6.10352	-4.57764	-2.74658	4.27246	2.44141	7.32422	13.1226	25.3296	65.3076	115.051	112.305	166.016
-15.564	-8.54492	-13.4277	-10.6812	-9.46045	-7.32422	-5.18799	0	2.13623	3.35693	8.23975	15.8691	28.6865	69.5801	114.746	107.117	157.166
-14.9536	-7.62939	-14.3433	-13.4277	-9.46045	-6.10352	-2.74658	-0.30518	0.61035	3.96729	11.5967	17.395	26.8555	72.6318	115.662	105.286	153.198
-18.3105	-3.96729	-13.1226	-13.1226	-9.76563	-6.71387	-4.57764	-0.61035	2.44141	3.96729	8.8501	13.7329	25.9399	76.2939	120.544	104.98	152.283
-18.6157	-5.79834	-14.6484	-11.9019	-9.76563	-7.93457	-3.96729	0.30518	-0.61035	3.96729	9.15527	13.1226	29.9072	73.2422	120.544	103.76	146.79
-15.2588	-7.62939	-17.7002	-12.5122	-9.15527	-4.88281	-4.57764	-0.30518	-0.61035	5.18799	11.9019	14.0381	29.602	73.8525	122.07	102.539	138.55
-15.8691	-4.57764	-17.395	-10.9863	-5.79834	-5.79834	-4.27246	-4.88281	2.44141	2.13623	9.46045	12.8174	28.9917	77.5147	126.343	102.539	136.719
-13.1226	-7.62939	-19.8364	-10.376	-8.23975	-6.10352	-3.05176	-3.05176	-1.2207	4.57764	8.54492	13.1226	32.0435	80.8716	125.732	101.318	138.855
-8.8501	-8.8501	-21.0571	-11.5967	-9.15527	-7.93457	-6.40869	-1.52588	-2.74658	5.79834	12.5122	13.4277	32.0435	81.4819	120.85	95.8252	139.771
-9.76563	-7.01904	-18.3105	-10.9863	-6.40869	-6.10352	-5.18799	-4.88281	2.13623	6.10352	11.2915	14.9536	28.3814	83.313	118.713	94.9097	144.043
-12.207	-8.8501	-20.1416	-10.6812	-6.40869	-6.10352	-3.66211	-1.2207	1.2207	4.88281	11.2915	14.0381	32.3486	83.6182	115.967	97.6562	147.095
-11.2915	-9.46045	-21.9727	-12.8174	-8.23975	-7.93457	-2.13623	2.13623	0.30518	5.18799	12.8174	14.0381	36.0107	81.7871	113.22	96.7407	148.926
-10.9863	-7.93457	-19.2261	-14.3433	-7.32422	-6.40869	-4.88281	-2.74658	1.83105	3.66211	11.5967	12.5122	32.3486	80.5664	111.084	101.624	149.536
-17.0898	-5.79834	-18.3105	-14.3433	-7.32422	-7.62939	-4.57764	-3.96729	1.52588	2.74658	8.23975	13.4277	34.79	77.5147	109.863	105.591	147.705
-15.8691	-9.46045	-20.4468	-16.1743	-8.54492	-8.23975	-4.27246	-1.2207	-0.30518	5.18799	11.2915	15.8691	33.5693	72.3267	111.084	102.234	145.874
-17.7002	-7.32422	-21.0571	-13.1226	-6.10352	-5.49316	-6.71387	-2.74658	0.91553	0.61035	11.9019	14.9536	26.8555	72.0215	115.051	98.8769	150.452
-20.1416	-6.71387	-18.3105	-11.5967	-6.71387	-4.27246	-3.35693	-2.74658	0	1.2207	9.15527	16.1743	24.4141	72.937	115.051	95.2148	151.062
-19.2261	-8.8501	-17.7002	-12.5122	-9.15527	-5.49316	-2.13623	0.61035	-2.74658	4.88281	10.376	18.0054	26.2451	69.8852	111.389	93.3838	147.4
-18.9209	-8.54492	-17.0898	-13.1226	-6.40869	-4.57764	-4.27246	-0.61035	1.2207	4.88281	10.6812	18.0054	24.7192	67.4438	113.525	93.9941	139.16
-22.583	-7.32422	-17.395	-10.376	-5.49316	-7.32422	-1.83105	-3.66211	0.61035	3.35693	7.32422	16.4795	26.8555	66.2231	112.305	93.689	138.245
-22.2778	-10.6812	-19.2261	-14.6484	-7.62939	-8.23975	-1.83105	-2.44141	-0.61035	2.74658	8.54492	17.395	27.771	66.5283	111.694	91.5527	135.498
-19.2261	-11.2915	-17.395	-13.4277	-6.71387	-6.71387	-4.88281	-2.13623	1.52588	1.52588	12.5122	17.0898	27.1606	70.4956	116.272	92.7734	133.362
-21.6675	-9.15527	-18.9209	-9.76563	-4.27246	-5.79834	-6.10352	-2.13623	0.91553	3.05176	8.23975	16.7847	25.9399	75.0732	118.408	102.234	133.972
-21.0571	-10.9863	-21.6675	-11.2915	-7.93457	-4.57764	-3.96729	-0.61035	-0.91553	3.96729	11.2915	18.6157	30.5176	75.6836	113.22	108.643	133.972
-17.395	-11.5967	-22.2778	-13.7329	-8.23975	-7.01904	-4.57764	1.2207	-0.91553	3.66211	13.4277	18.3105	28.6865	81.1768	111.084	111.084	133.972
-19.2261	-10.376	-17.7002	-12.8174	-7.32422	-6.10352	-5.18799	-0.91553	2.74658	2.44141	9.15527	18.9209	27.1606	81.7871	109.863	114.136	129.395
-19.8364	-11.9019	-17.0898	-12.8174	-10.376	-5.79834	-3.66211	-0.30518	-1.52588	2.74658	8.23975	19.2261	29.9072	75.9888	108.948	120.544	135.498
-18.0054	-10.6812	-17.0898	-14.3433	-8.8501	-6.40869	-3.35693	0	0	3.05176	10.0708	18.0054	26.5503	74.4629	110.168	120.239	144.958
-20.4468	-8.54492	-16.1743	-12.207	-6.71387	-5.49316	-4.27246	-4.88281	3.35693	3.35693	7.93457	20.4468	24.1089	79.0405	114.136	119.629	150.757
-21.6675	-6.10352	-14.0381	-11.9019	-6.10352	-6.40869	-3.05176	-1.52588	2.13623	3.05176	8.23975	21.3623	24.4141	80.8716	117.188	112.915	158.691
-18.0054	-8.54492	-14.6484	-14.0381	-9.46045	-7.01904	-4.57764	0.30518	1.52588	4.27246	10.6812	22.583	23.1934	80.2612	119.019	108.643	160.828
-19.8364	-5.18799	-14.3433	-12.8174	-8.23975	-6.71387	-3.96729	-3.66211	2.13623	1.83105	9.76563	21.3623	22.583	80.2612	120.544	108.032	158.691
-22.2778	-3.05176	-10.376	-12.207	-7.93457	-7.32422	-3.35693	-2.74658	-0.61035	2.44141	8.54492	20.1416	22.8882	76.9043	121.765	105.896	156.555
-21.3623	-7.62939	-12.207	-16.4795	-8.8501	-7.62939	-3.96729	-0.61035	-1.2207	3.05176	10.9863	23.1934	21.6675	77.2095	130.31	105.591	149.841
-24.1089	-5.49316	-10.6812	-15.564	-8.23975	-6.40869	-4.57764	-3.66211	3.66211	2.74658	9.76563	24.1089	19.8364	78.125	136.719	104.675	145.874
-29.2969	-4.57764	-12.207	-14.3433	-9.15527	-6.10352	-3.66211	-4.57764	1.52588	3.66211	10.376	24.4141	22.583	78.125	132.446	108.337	140.686
-28.9917	-4.57764	-13.4277	-15.2588	-6.71387	-5.79834	-1.2207	-0.30518	0.61035	3.35693	10.6812	23.4985	25.6348	75.3784	129.089	109.253	136.414
-28.0762	-5.79834	-12.8174	-14.6484	-4.88281	-6.40869	-4.57764	-1.52588	2.74658	3.35693	9.46045	21.3623	23.1934	76.5991	130.92	106.201	134.583
-31.7383	-6.10352	-12.8174	-13.4277	-5.79834	-7.93457	-4.27246	-2.13623	2.13623	3.05176	8.23975	20.1416	27.1606	75.3784	134.583	106.506	131.531
-31.4331	-10.376	-12.5122	-16.7847	-7.93457	-7.32422	-3.05176	-0.91553	-0.91553	2.74658	10.6812	22.2778	29.602	73.5474	134.277	110.474	131.531
-32.959	-9.76563	-11.9019	-15.2588	-5.79834	-6.71387	-4.88281	-0.61035	1.2207	3.66211	10.6812	23.4985	26.8555	75.6836	131.531	115.356	131.836
-35.7056	-5.49316	-10.376	-12.8174	-6.10352	-6.40869	-4.88281	-3.66211	4.27246	4.57764	9.46045	21.9727	27.4658	80.8716	136.108	122.986	133.362
-33.2642	-8.54492	-14.0381	-14.0381	-10.376	-5.49316	-4.57764	-0.91553	0	3.96729	11.9019	20.1416	29.9072	79.0405	143.738	127.869	134.888
-30.2124	-7.62939	-14.9536	-13.4277	-9.15527	-4.27246	-4.57764	-2.44141	0.91553	5.49316	12.5122	18.0054	28.9917	77.5147	151.062	129.089	133.057
-28.3814	-8.54492	-11.2915	-10.0708	-9.76563	-4.88281	-5.18799	-1.52588	3.35693	5.18799	10.9863	19.5312	28.3814	76.5991	156.86	129.089	127.258
-27.1606	-10.9863	-12.207	-12.5122	-10.0708	-6.40869	-2.13623	1.2207	1.52588	4.88281	10.376	21.3623	32.6538	75.9888	156.555	130.31	124.207
-23.4985	-11.5967	-11.9019	-14.0381	-8.8501	-5.49316	-3.35693	0.30518	0.61035	4.27246	11.5967	21.6675	31.7383	81.1768	158.691	130.615	126.343
-27.1606	-10.6812	-11.2915	-12.207	-8.23975	-6.10352	-4.88281	-1.83105	2.44141	2.74658	9.76563	21.0571	33.5693	82.7026	158.691	135.498	127.258
-26.2451	-12.207	-13.1226	-12.8174	-10.9863	-4.57764	-3.35693	-1.2207	-0.91553	4.27246	11.5967	20.4468	36.9263	81.7871	152.283	139.465	127.869
-21.3623	-14.3433	-14.9536	-14.0381	-10.6812	-5.49316	-3.96729	0.30518	-0.30518	4.27246	11.9019	20.752	33.2642	86.6699	147.705	141.296	123.901
-21.0571	-12.207	-15.2588	-11.9019	-7.32422	-5.49316	-6.10352	-3.66211	3.96729	5.79834	10.9863	19.2261	31.1279	87.5854	146.79	142.517	119.019
-24.7192	-12.8174	-14.9536	-10.9863	-12.207	-7.32422	-6.40869	-0.61035	0.91553	5.79834	14.3433	21.9727	33.8745	83.0078	138.245	142.212	122.681
-21.9727	-14.0381	-14.6484	-12.5122	-11.5967	-5.18799	-3.05176	1.52588	-0.91553	3.66211	15.8691	24.4141	34.1797	82.0923	131.836	132.446	125.427
-21.0571	-12.207	-14.0381	-10.9863	-9.76563	-4.88281	-3.96729	-2.13623	0.61035	3.05176	12.5122	22.583	33.2642	85.144	132.751	124.817	125.122
-23.4985	-15.564	-14.6484	-11.2915	-10.376	-6.71387	-3.05176	-3.35693	-1.52588	3.66211	10.6812	23.4985	34.1797	83.0078	129.7	127.258	129.395
-20.4468	-18.6157	-15.564	-12.5122	-12.8174	-5.49316	-2.44141	-2.13623	-0.61035	5.49316	12.5122	25.0244	29.9072	84.2285	128.479	129.089	142.212
-21.3623	-17.395	-12.207	-11.9019	-9.76563	-6.10352	-4.57764	-3.05176	2.44141	5.18799	10.9863	22.8882	26.8555	87.5854	131.836	131.226	147.095
-22.8882	-14.3433	-12.5122	-13.1226	-8.54492	-8.23975	-3.66211	-3.66211	1.2207	4.88281	11.9019	25.6348	30.5176	88.1958	129.7	131.226	151.367
-23.1934	-15.8691	-15.564	-15.8691	-10.9863	-7.93457	-2.44141	0	-1.52588	3.35693	15.564	26.5503	28.3814	89.4165	129.089	134.888	160.217
-21.3623	-12.8174	-14.6484	-13.4277	-9.46045	-7.32422	-5.79834	-2.74658	1.83105	3.66211	12.207	24.1089	22.8882	94.2993	129.395	140.076	165.1
-21.9727	-12.5122	-14.6484	-12.5122	-11.2915	-7.32422	-5.79834	-3.05176	0.91553	5.49316	9.15527	22.8882	23.4985	94.9097	123.291	147.095	161.743
-19.5312	-17.0898	-17.395	-13.1226	-11.2915	-5.49316	-3.35693	0.30518	-0.61035	4.27246	12.207	25.3296	23.1934	93.689	113.22	156.555	154.724
-17.395	-17.395	-17.7002	-13.4277	-10.376	-6.40869	-4.27246	-1.52588	2.74658	3.66211	12.207	27.1606	20.752	98.2666	110.779	160.217	148.01
-20.4468	-17.0898	-14.9536	-13.1226	-10.376	-9.15527	-3.35693	-3.66211	2.74658	3.96729	8.8501	27.1606	21.9727	96.1304	102.539	160.522	132.751
-19.8364	-17.395	-16.4795	-14.3433	-12.8174	-7.01904	-3.66211	-2.13623	-1.2207	3.66211	11.2915	28.0762	22.583	90.6372	94.9097	159.302	126.038
-16.7847	-14.9536	-17.7002	-13.1226	-10.9863	-7.32422	-5.49316	-0.61035	-1.2207	3.05176	11.5967	23.1934	18.6157	93.0786	96.7407	159.302	125.732
-16.4795	-13.7329	-14.6484	-12.207	-9.46045	-6.71387	-7.93457	-2.74658	1.52588	2.13623	8.23975	22.2778	18.6157	90.9424	96.7407	161.438	118.103
-12.8174	-15.8691	-17.7002	-14.0381	-11.2915	-4.57764	-4.57764	-2.74658	-3.05176	3.66211	10.376	25.6348	19.2261	88.8062	94.9097	162.048	115.662
-9.15527	-14.0381	-15.2588	-13.4277	-9.76563	-7.62939	-5.49316	-1.83105	-1.2207	3.35693	10.376	25.3296	15.564	92.1631	97.9614	163.574	120.85
-12.207	-12.8174	-15.564	-11.2915	-8.54492	-7.93457	-6.10352	-2.74658	2.74658	3.66211	7.93457	23.1934	16.4795	94.9097	102.539	165.1	119.324
-12.207	-13.7329	-15.564	-13.7329	-10.9863	-8.23975	-4.57764	-1.2207	0.91553	2.13623	10.376	26.2451	16.7847	93.0786	104.065	167.542	107.422
-8.54492	-13.1226	-14.0381	-14.0381	-10.6812	-7.01904	-4.27246	0	0.91553	3.35693	11.9019	26.2451	14.9536	96.7407	109.863	165.71	104.37
-10.376	-10.376	-13.1226	-10.6812	-8.23975	-6.40869	-4.27246	-2.13623	2.74658	4.27246	6.71387	24.7192	14.0381	98.8769	112.61	171.509	99.1821
-11.9019	-9.15527	-15.8691	-12.5122	-10.376	-6.40869	-3.66211	-0.61035	1.83105	4.57764	9.15527	24.1089	16.1743	95.8252	111.389	175.781	96.7407
-8.8501	-11.5967	-17.0898	-15.2588	-10.0708	-5.49316	-3.05176	1.52588	-2.13623	3.66211	9.76563	23.4985	12.8174	96.4356	112	177.917	94.9097
-9.46045	-8.8501	-14.0381	-12.5122	-8.8501	-6.71387	-5.79834	-1.83105	0.61035	3.66211	8.54492	21.6675	11.2915	96.1304	114.746	178.833	93.689
-10.9863	-7.93457	-14.9536	-10.9863	-11.2915	-7.01904	-4.88281	-4.57764	-0.30518	4.57764	9.76563	23.8037	13.7329	93.689	111.694	176.392	95.8252
-8.8501	-9.76563	-14.9536	-14.3433	-11.5967	-6.10352	-3.66211	-0.61035	-0.61035	2.13623	7.93457	23.4985	14.3433	89.7217	112.61	171.509	99.7925
-7.62939	-7.32422	-12.5122	-12.207	-10.376	-6.40869	-3.96729	-0.91553	3.35693	1.2207	6.10352	21.9727	16.7847	90.332	116.272	160.217	102.234
-12.207	-8.23975	-12.207	-9.46045	-10.0708	-6.10352	-2.44141	-2.44141	1.83105	1.83105	3.96729	24.7192	19.8364	85.4492	113.22	155.945	105.591
-8.23975	-8.8501	-12.8174	-12.8174	-7.62939	-5.79834	-2.44141	-1.83105	0	2.74658	7.62939	23.1934	20.752	79.0405	104.37	153.809	106.506
-4.88281	-5.79834	-9.76563	-10.0708	-7.62939	-8.54492	-4.57764	-1.83105	1.52588	4.27246	8.23975	21.0571	20.1416	74.7681	102.539	155.334	101.318
-6.40869	-4.88281	-10.9863	-8.23975	-8.23975	-8.23975	-4.88281	-3.66211	3.96729	5.49316	8.8501	20.4468	22.583	69.5801	103.455	155.64	98.5718
-3.05176	-6.10352	-14.6484	-12.8174	-10.0708	-6.40869	-4.27246	-0.61035	0.61035	5.18799	10.0708	22.2778	25.0244	67.749	105.591	149.536	104.065
-3.05176	-6.10352	-12.8174	-12.8174	-9.46045	-4.88281	-5.18799	1.2207	1.52588	5.49316	8.8501	19.2261	24.4141	70.1904	108.643	148.926	111.389
-6.10352	-3.96729	-11.5967	-9.76563	-9.76563	-4.27246	-4.88281	-1.83105	2.44141	5.49316	8.23975	19.8364	26.5503	65.6128	112.305	149.536	120.85
-5.49316	-7.62939	-15.564	-10.6812	-12.5122	-4.88281	-2.44141	0.30518	-0.61035	2.13623	11.5967	21.9727	27.771	61.3403	109.253	153.503	131.531
-2.13623	-7.01904	-17.0898	-9.76563	-9.76563	-4.88281	-3.96729	-1.52588	3.05176	3.96729	13.1226	20.1416	25.9399	62.8662	110.168	154.724	142.822
-3.66211	-7.62939	-16.1743	-7.93457	-8.23975	-5.49316	-4.27246	-1.83105	4.27246	5.79834	10.0708	19.5312	28.3814	62.8662	112.61	155.029	154.114
-3.96729	-6.10352	-15.2588	-9.76563	-9.15527	-5.49316	-3.35693	0.61035	2.13623	5.49316	13.4277	19.5312	27.4658	60.73	107.117	147.705	164.49
-3.35693	-6.10352	-15.564	-9.15527	-10.0708	-7.62939	-5.49316	2.74658	0.61035	5.18799	12.5122	18.9209	25.0244	61.3403	104.98	138.245	166.626
-3.66211	-6.71387	-13.1226	-7.62939	-9.76563	-8.23975	-6.40869	-2.13623	0.91553	4.27246	11.2915	17.7002	25.9399	57.373	102.844	133.667	155.64
-6.71387	-10.376	-13.7329	-9.76563	-10.9863	-7.32422	-4.57764	-4.27246	-1.2207	4.27246	12.207	19.8364	28.3814	54.6265	98.5718	132.751	145.874
-4.88281	-10.376	-14.3433	-10.9863	-8.8501	-6.71387	-2.74658	0.91553	-1.2207	3.05176	11.5967	20.1416	26.2451	54.6265	101.013	131.226	144.653
-6.10352	-7.01904	-13.1226	-8.54492	-9.15527	-8.54492	-3.66211	-3.05176	3.66211	3.96729	7.93457	17.7002	27.771	58.8989	110.168	126.038	135.193
-10.376	-8.23975	-14.3433	-8.54492	-10.0708	-6.10352	-3.05176	-4.57764	0	4.88281	10.9863	21.6675	29.602	55.8472	110.168	130.005	128.174
-9.76563	-8.54492	-15.564	-10.6812	-8.54492	-4.57764	-2.74658	0.30518	1.83105	4.27246	10.6812	21.3623	28.6865	55.8472	107.727	132.446	130.005
-12.207	-7.01904	-13.1226	-9.15527	-7.62939	-5.79834	-5.18799	0.91553	3.35693	3.35693	8.8501	15.8691	32.6538	59.2041	112	135.193	129.089
-14.6484	-8.8501	-13.7329	-7.62939	-8.8501	-7.62939	-3.96729	-0.91553	0.61035	2.44141	10.376	16.4795	38.7573	55.542	112	135.498	123.596
-12.207	-11.2915	-15.8691	-8.8501	-9.46045	-5.49316	-3.05176	1.2207	-0.30518	2.44141	11.9019	18.9209	38.4522	57.373	112.61	132.446	116.272
-10.6812	-9.46045	-12.8174	-10.376	-7.32422	-6.40869	-5.49316	0.30518	1.52588	4.57764	10.9863	20.4468	37.5366	60.73	110.779	132.141	105.286
-13.1226	-8.54492	-14.6484	-9.46045	-8.23975	-6.71387	-4.27246	-1.52588	2.13623	3.66211	10.9863	20.4468	39.978	57.9834	108.337	132.446	94.2993
-10.6812	-10.9863	-16.1743	-11.9019	-9.46045	-7.32422	-3.96729	0.61035	-1.52588	4.57764	14.0381	20.752	40.5884	54.3213	103.76	137.939	89.4165
-8.8501	-8.54492	-12.5122	-10.0708	-10.0708	-8.54492	-5.18799	1.2207	2.13623	6.40869	10.376	18.0054	35.7056	56.1523	103.455	141.907	86.6699
-11.5967	-7.93457	-13.7329	-8.54492	-10.9863	-10.0708	-4.57764	-4.27246	3.35693	4.27246	10.9863	18.6157	36.3159	51.5747	103.455	143.127	85.4492
-13.1226	-9.15527	-14.6484	-11.2915	-10.6812	-7.01904	-2.74658	-3.35693	2.13623	4.57764	14.3433	19.8364	32.6538	51.8799	100.708	147.705	89.4165
-9.46045	-8.54492	-12.5122	-10.6812	-8.8501	-6.71387	-5.18799	-2.44141	1.83105	3.35693	11.9019	17.0898	28.9917	57.0679	103.149	159.607	94.6045
-11.9019	-8.8501	-13.7329	-10.6812	-8.23975	-7.62939	-5.18799	-3.05176	-0.91553	3.96729	12.207	15.8691	32.0435	53.1006	104.98	171.509	97.6562
-12.5122	-8.8501	-15.2588	-13.1226	-9.46045	-6.40869	-0.61035	1.2207	-0.91553	3.96729	14.6484	16.1743	32.6538	51.8799	101.929	173.035	96.1304
-11.5967	-10.376	-15.2588	-13.7329	-8.54492	-8.54492	-3.66211	2.44141	2.74658	3.96729	12.8174	12.8174	29.602	51.2695	101.318	170.288	97.9614
-12.5122	-9.76563	-13.4277	-13.1226	-7.32422	-7.62939	-6.40869	-3.05176	2.74658	5.18799	10.6812	13.1226	32.6538	49.4385	103.76	170.593	96.4356
-12.207	-10.6812	-16.4795	-12.5122	-7.62939	-6.71387	-1.52588	-3.96729	-0.91553	2.74658	11.5967	16.4795	33.5693	50.0488	101.318	172.424	97.3511
-9.76563	-11.2915	-15.8691	-14.9536	-7.93457	-6.10352	-3.35693	0.30518	0.61035	4.88281	11.5967	14.9536	31.7383	53.4058	101.318	175.171	100.098
-13.4277	-11.2915	-14.3433	-12.5122	-8.23975	-9.15527	-7.01904	0	3.05176	3.05176	10.376	16.1743	33.5693	50.9644	103.149	180.054	105.896
-17.395	-13.4277	-17.7002	-14.0381	-9.46045	-7.62939	-3.35693	-1.83105	-0.30518	2.74658	12.8174	18.9209	34.1797	46.0815	100.708	183.716	110.779
-17.395	-12.8174	-18.3105	-16.7847	-9.76563	-5.49316	-3.66211	1.52588	0	4.88281	12.5122	16.7847	31.1279	48.2178	103.149	189.514	114.136
-16.4795	-10.6812	-16.7847	-15.564	-9.46045	-6.40869	-5.79834	-0.30518	3.05176	4.27246	9.46045	14.6484	31.7383	50.6592	105.286	198.669	115.967
-19.5312	-7.93457	-18.9209	-16.1743	-11.2915	-6.40869	-4.88281	-2.13623	1.83105	1.83105	12.207	16.4795	33.5693	51.8799	105.896	204.468	115.051
-17.395	-9.46045	-21.3623	-15.564	-10.0708	-7.01904	-3.35693	-0.30518	0.30518	3.96729	12.5122	17.0898	29.9072	53.7109	108.948	210.266	117.493
-15.564	-9.46045	-17.395	-12.5122	-7.32422	-8.8501	-5.49316	-1.52588	3.35693	7.01904	8.23975	15.8691	28.0762	59.5093	115.051	202.026	121.765
-18.9209	-10.6812	-18.6157	-10.9863	-9.15527	-7.62939	-4.27246	-4.88281	0.61035	5.18799	10.0708	18.9209	31.1279	61.9507	114.136	193.481	125.427
-18.0054	-8.54492	-20.752	-13.1226	-10.376	-4.88281	-4.27246	-2.44141	-1.2207	4.88281	11.9019	20.1416	29.9072	65.3076	109.863	183.105	132.751
-16.4795	-8.23975	-18.9209	-12.207	-11.2915	-4.57764	-7.01904	-1.2207	1.83105	4.27246	8.8501	15.2588	29.2969	70.1904	114.746	177.002	135.498
-19.8364	-7.32422	-18.6157	-12.207	-9.46045	-8.54492	-4.27246	-2.44141	0.30518	3.66211	9.46045	17.0898	34.79	68.9697	118.103	173.035	137.939
-18.9209	-7.01904	-18.9209	-15.2588	-11.5967	-5.49316	-2.74658	-1.83105	-0.30518	3.35693	9.46045	19.5312	34.1797	69.8852	114.441	167.236	144.958
-15.8691	-7.62939	-18.3105	-14.0381	-10.9863	-4.88281	-4.88281	0.30518	1.83105	5.49316	6.10352	16.7847	37.2315	70.8008	117.493	166.016	151.062
-16.4795	-8.23975	-17.0898	-12.207	-12.5122	-4.57764	-6.10352	-3.66211	0.30518	4.27246	9.46045	15.8691	39.3677	69.5801	115.356	163.879	148.315
-13.7329	-10.376	-19.8364	-12.8174	-10.6812	-5.79834	-1.83105	-0.91553	-3.35693	3.66211	10.6812	17.395	37.2315	67.1387	105.591	160.828	142.822
-11.9019	-5.18799	-19.2261	-10.9863	-9.46045	-6.71387	-4.57764	1.2207	0.30518	6.10352	9.76563	15.564	36.9263	66.5283	99.1821	158.386	144.653
-14.3433	-4.88281	-18.6157	-9.76563	-11.5967	-7.32422	-5.18799	-2.13623	2.13623	2.74658	8.8501	14.3433	41.1987	66.8335	89.4165	149.231	138.855
-13.1226	-6.71387	-19.5312	-13.4277	-10.376	-8.23975	-3.05176	-1.83105	-0.61035	3.35693	9.76563	18.0054	43.335	66.2231	79.9561	139.771	131.226
-9.46045	-4.88281	-15.8691	-12.8174	-7.93457	-5.79834	-1.2207	-1.2207	-0.30518	5.18799	8.8501	15.564	43.0298	70.1904	76.9043	134.888	130.005
-12.207	-4.57764	-15.2588	-8.23975	-8.54492	-7.01904	-4.27246	-2.74658	2.74658	3.66211	7.01904	11.5967	46.6919	69.2749	74.7681	133.362	130.615
-11.9019	-4.88281	-16.7847	-9.76563	-10.9863	-5.79834	-4.57764	-3.05176	-0.61035	1.83105	10.0708	14.0381	46.3867	66.2231	74.7681	136.108	134.888
-8.8501	-4.57764	-17.0898	-12.207	-10.376	-6.10352	-3.96729	0	-0.61035	3.66211	7.62939	14.9536	46.0815	68.3594	78.4302	141.602	134.888
-10.6812	-3.05176	-14.0381	-10.0708	-8.8501	-8.54492	-6.10352	-1.52588	2.44141	2.74658	7.32422	13.4277	49.1333	71.106	82.3975	142.822	130.005
-13.1226	-3.96729	-17.7002	-11.9019	-9.76563	-8.23975	-3.05176	-2.13623	0.30518	2.44141	10.0708	14.3433	53.4058	72.6318	81.1768	144.043	128.174
-13.4277	-4.88281	-17.7002	-14.6484	-8.8501	-6.10352	-3.96729	0.30518	1.52588	6.71387	10.376	16.1743	50.9644	75.6836	82.3975	148.01	130.31
-15.2588	-3.05176	-13.7329	-10.9863	-8.23975	-8.8501	-6.71387	-2.44141	2.74658	6.10352	9.46045	16.1743	54.3213	84.5337	85.144	154.419	128.784
-19.8364	-1.2207	-16.4795	-11.2915	-7.93457	-7.62939	-5.18799	-3.96729	-0.30518	2.74658	10.9863	18.6157	56.4575	85.7544	85.4492	158.386	128.784
-19.2261	0	-16.1743	-13.1226	-8.23975	-5.79834	-2.74658	-1.2207	-1.52588	4.88281	10.9863	17.0898	55.2368	87.5854	92.7734	159.607	127.869
-23.1934	-1.2207	-15.2588	-10.6812	-10.376	-7.93457	-6.10352	-2.74658	3.35693	5.79834	9.46045	14.9536	57.373	89.7217	101.013	162.048	126.038
-27.1606	-1.52588	-16.7847	-11.2915	-10.0708	-7.01904	-4.88281	-2.74658	2.44141	3.05176	10.0708	16.7847	60.73	87.8906	102.539	159.912	122.681
-27.771	-0.30518	-20.4468	-14.6484	-10.9863	-6.10352	-3.96729	0.30518	-0.30518	4.88281	9.46045	18.9209	56.4575	83.9233	102.844	160.522	125.427
-28.0762	-0.30518	-17.0898	-13.7329	-10.376	-6.10352	-6.10352	-0.61035	3.66211	6.40869	9.15527	14.9536	54.6265	82.3975	107.422	160.217	125.427
-29.9072	-2.13623	-17.7002	-10.6812	-7.62939	-6.40869	-4.88281	-2.74658	2.13623	4.88281	9.76563	15.2588	58.8989	79.0405	108.032	156.555	123.596
-26.8555	-3.35693	-19.8364	-14.3433	-6.40869	-5.18799	-1.52588	0.61035	0.61035	4.57764	9.76563	19.2261	53.4058	78.7353	109.253	155.945	125.732
-25.0244	-1.52588	-17.395	-12.5122	-6.71387	-5.18799	-3.35693	-0.91553	2.74658	6.10352	8.54492	20.1416	50.6592	79.3457	114.441	157.776	130.31
-24.1089	-1.2207	-17.7002	-9.15527	-7.93457	-6.40869	-5.49316	-5.18799	2.44141	4.57764	11.9019	21.0571	50.0488	70.8008	115.051	156.25	130.615
-21.6675	-2.13623	-18.6157	-12.8174	-7.93457	-4.27246	-0.61035	-1.83105	-2.13623	4.88281	12.207	22.8882	46.9971	68.9697	118.408	151.672	132.446
-18.6157	-3.66211	-17.0898	-11.9019	-7.62939	-5.18799	-3.35693	2.44141	0	7.01904	10.0708	23.1934	45.4712	71.7163	123.901	151.672	135.193
-17.395	-4.57764	-14.3433	-10.376	-9.15527	-7.93457	-5.79834	-3.35693	2.74658	5.49316	12.207	25.0244	43.9453	67.4438	123.291	147.705	132.751
-17.395	-6.40869	-18.0054	-12.8174	-9.76563	-6.10352	-3.05176	-1.52588	0.30518	3.96729	13.1226	28.3814	41.5039	63.7817	117.493	141.602	128.479
-15.8691	-5.49316	-15.2588	-13.7329	-7.62939	-3.35693	-5.79834	0.61035	2.74658	5.49316	10.6812	25.9399	38.147	66.5283	120.239	134.277	123.901
-18.0054	-5.49316	-13.7329	-10.376	-6.10352	-7.01904	-6.71387	-1.83105	3.05176	5.18799	11.5967	25.3296	42.1143	67.4438	126.953	126.648	119.934
-18.0054	-6.71387	-17.0898	-12.207	-8.23975	-6.10352	-3.96729	-3.66211	0	4.27246	15.2588	28.9917	40.2832	68.3594	128.174	126.953	117.188
-14.6484	-6.71387	-15.564	-14.0381	-8.23975	-3.66211	-2.13623	-0.30518	1.52588	5.18799	13.4277	27.1606	36.9263	75.9888	131.531	130.615	117.188
[truncated: 2,003 more rows]

## Sheet: A_PregS
External solution, 0 uM Icilin, 40 uM PregS
-160 mV	-140 mV	-120 mV	-100 mV	-80 mV	-60 mV	-40 mV	-20 mV	0 mV	20 mV	40 mV	60 mV	80 mV	100 mV	120 mV	140 mV	160 mV
pA	pA	pA	pA	pA	pA	pA	pA	pA	pA	pA	pA	pA	pA	pA	pA	pA
-87.5854	-75.3784	-79.9561	-79.0405	-69.8852	-67.749	-66.5283	-62.561	-62.2559	-67.1387	-57.6782	-57.0679	-59.8145	-58.2886	-57.0679	-54.3213	-60.73
-85.7544	-76.5991	-80.2612	-76.9043	-69.2749	-66.8335	-67.4438	-63.4766	-58.2886	-68.6646	-59.5093	-55.542	-58.5938	-56.7627	-57.373	-50.9644	-60.1196
-86.0596	-77.5147	-80.5664	-78.4302	-67.1387	-64.6973	-67.1387	-65.0024	-59.5093	-67.4438	-56.7627	-57.0679	-63.4766	-56.7627	-57.6782	-51.8799	-61.0352
-86.9751	-78.7353	-78.7353	-77.8198	-68.6646	-65.0024	-66.2231	-61.3403	-62.8662	-65.0024	-59.2041	-60.1196	-59.8145	-58.8989	-58.2886	-54.6265	-64.0869
-86.0596	-79.0405	-80.8716	-75.3784	-66.2231	-66.2231	-70.8008	-59.5093	-62.2559	-65.918	-62.2559	-58.8989	-58.5938	-57.9834	-60.73	-56.7627	-63.1714
-83.9233	-79.3457	-81.1768	-80.8716	-66.2231	-62.8662	-67.1387	-62.8662	-62.2559	-65.0024	-59.8145	-56.7627	-61.9507	-57.6782	-59.2041	-53.7109	-62.561
-86.0596	-77.2095	-81.4819	-81.1768	-69.5801	-64.6973	-65.3076	-64.0869	-63.7817	-64.3921	-57.373	-57.6782	-62.561	-60.1196	-58.2886	-52.4902	-62.2559
-85.7544	-79.0405	-83.9233	-77.8198	-68.0542	-66.5283	-67.4438	-63.7817	-60.4248	-66.8335	-60.73	-56.4575	-59.5093	-60.73	-58.2886	-55.542	-59.2041
-88.1958	-80.2612	-80.2612	-78.7353	-68.6646	-64.0869	-65.6128	-62.2559	-59.8145	-65.0024	-58.5938	-55.2368	-62.561	-58.5938	-60.4248	-52.7954	-59.2041
-90.0269	-77.2095	-79.9561	-78.125	-69.5801	-63.4766	-63.7817	-61.0352	-65.0024	-65.0024	-56.7627	-59.2041	-63.7817	-58.8989	-59.2041	-54.3213	-61.9507
-88.1958	-77.5147	-82.7026	-76.5991	-68.6646	-67.4438	-63.7817	-60.73	-61.3403	-63.1714	-58.5938	-58.2886	-60.73	-58.2886	-59.5093	-55.542	-60.4248
-85.7544	-77.2095	-81.1768	-77.2095	-65.6128	-65.918	-64.6973	-62.2559	-57.0679	-63.7817	-57.9834	-56.1523	-61.3403	-58.2886	-60.4248	-52.1851	-62.2559
-87.8906	-76.9043	-78.125	-79.3457	-66.5283	-62.8662	-63.7817	-61.6455	-60.1196	-61.0352	-56.7627	-57.0679	-61.3403	-59.2041	-58.2886	-50.6592	-64.6973
-88.501	-77.8198	-82.3975	-78.125	-65.6128	-65.918	-68.9697	-61.3403	-61.0352	-61.0352	-57.6782	-58.8989	-57.6782	-58.8989	-59.8145	-55.2368	-62.561
-87.8906	-77.2095	-83.0078	-79.3457	-67.1387	-63.4766	-68.6646	-64.0869	-60.73	-62.561	-60.73	-56.7627	-59.2041	-57.0679	-61.3403	-54.0161	-61.3403
-89.1113	-76.2939	-81.1768	-80.8716	-70.1904	-63.1714	-64.6973	-62.2559	-61.9507	-62.561	-58.2886	-58.8989	-63.7817	-56.7627	-61.0352	-53.7109	-60.4248
-89.7217	-75.9888	-81.7871	-79.3457	-68.3594	-66.2231	-65.918	-62.561	-61.3403	-61.9507	-59.5093	-60.1196	-62.2559	-54.3213	-58.2886	-56.1523	-61.3403
-90.0269	-76.9043	-82.3975	-80.5664	-64.6973	-65.0024	-66.5283	-63.7817	-59.2041	-62.561	-60.4248	-57.0679	-61.6455	-55.2368	-59.8145	-54.6265	-61.6455
-87.8906	-75.9888	-79.9561	-80.8716	-67.749	-62.561	-63.7817	-62.561	-61.9507	-63.4766	-59.5093	-57.373	-61.6455	-55.542	-58.5938	-53.4058	-64.0869
-88.1958	-76.9043	-80.8716	-80.2612	-69.2749	-64.6973	-65.6128	-60.73	-61.9507	-61.0352	-61.0352	-58.2886	-62.8662	-55.8472	-58.8989	-54.3213	-62.2559
-87.5854	-78.4302	-83.0078	-78.125	-67.1387	-66.5283	-67.749	-61.0352	-59.8145	-62.2559	-59.8145	-57.6782	-61.6455	-54.6265	-59.8145	-54.3213	-61.0352
-88.1958	-79.6509	-79.9561	-81.1768	-72.3267	-62.561	-66.8335	-63.4766	-60.4248	-61.9507	-56.4575	-58.2886	-62.561	-55.8472	-57.9834	-52.7954	-61.0352
-88.1958	-77.8198	-79.0405	-80.8716	-73.2422	-65.918	-66.5283	-60.73	-59.2041	-59.8145	-58.5938	-62.561	-60.73	-54.0161	-59.2041	-55.542	-61.6455
-87.8906	-78.7353	-78.7353	-78.7353	-67.4438	-66.5283	-69.5801	-60.4248	-59.5093	-58.2886	-61.3403	-61.9507	-59.2041	-54.0161	-60.4248	-54.6265	-61.9507
-88.501	-80.2612	-77.5147	-79.9561	-66.8335	-62.561	-69.2749	-63.4766	-63.4766	-57.9834	-58.2886	-59.5093	-62.561	-55.542	-60.73	-52.1851	-62.2559
-86.6699	-76.9043	-79.3457	-79.3457	-66.8335	-62.8662	-66.8335	-64.0869	-62.8662	-59.2041	-57.6782	-61.0352	-58.8989	-56.7627	-61.0352	-54.3213	-59.8145
-85.7544	-75.9888	-82.0923	-78.125	-63.4766	-67.1387	-66.2231	-64.0869	-58.2886	-58.5938	-61.6455	-60.73	-56.4575	-56.1523	-63.7817	-54.3213	-57.0679
-86.3648	-75.3784	-79.0405	-78.4302	-65.918	-66.5283	-66.2231	-65.6128	-61.0352	-57.373	-58.8989	-59.2041	-59.5093	-56.1523	-63.4766	-53.4058	-58.8989
-88.1958	-77.5147	-78.125	-78.4302	-68.9697	-64.3921	-65.3076	-63.4766	-64.6973	-56.7627	-57.0679	-62.2559	-60.1196	-55.8472	-60.1196	-51.2695	-60.1196
-88.8062	-77.5147	-83.9233	-75.9888	-65.0024	-65.3076	-67.749	-64.3921	-61.3403	-58.8989	-59.5093	-60.1196	-57.9834	-57.0679	-60.73	-54.9316	-58.2886
-86.9751	-78.4302	-84.8389	-77.5147	-63.4766	-66.2231	-68.9697	-65.918	-60.4248	-57.9834	-57.9834	-57.0679	-59.8145	-58.8989	-63.7817	-53.1006	-56.7627
-87.8906	-79.3457	-85.144	-79.0405	-67.4438	-65.3076	-66.5283	-64.0869	-62.2559	-56.1523	-57.0679	-61.3403	-63.1714	-58.5938	-62.2559	-51.5747	-58.8989
-87.8906	-79.9561	-85.144	-77.5147	-64.3921	-65.918	-70.1904	-62.561	-61.6455	-57.6782	-58.8989	-61.3403	-59.2041	-57.0679	-60.73	-55.8472	-56.4575
-90.0269	-80.2612	-82.3975	-79.6509	-67.4438	-66.5283	-69.5801	-64.6973	-61.6455	-55.542	-60.4248	-55.8472	-60.1196	-54.6265	-62.2559	-54.9316	-58.2886
-88.8062	-77.8198	-79.9561	-82.0923	-70.4956	-66.8335	-68.0542	-62.8662	-65.918	-57.373	-56.7627	-58.2886	-61.9507	-54.9316	-61.0352	-56.1523	-60.73
-88.1958	-78.7353	-81.1768	-84.2285	-67.4438	-69.8852	-66.5283	-59.8145	-63.7817	-56.7627	-59.5093	-57.6782	-57.373	-55.542	-61.6455	-57.6782	-55.8472
-88.8062	-76.2939	-82.7026	-81.7871	-65.6128	-69.2749	-67.1387	-59.8145	-61.3403	-57.9834	-59.5093	-55.542	-58.2886	-55.542	-63.4766	-54.9316	-57.6782
-91.8579	-76.2939	-81.4819	-82.3975	-64.3921	-65.0024	-64.3921	-61.6455	-67.4438	-59.5093	-56.7627	-58.8989	-59.8145	-57.373	-61.0352	-53.4058	-57.373
-91.5527	-77.2095	-83.6182	-79.3457	-65.3076	-66.5283	-65.0024	-62.561	-64.3921	-57.373	-57.9834	-58.8989	-58.5938	-56.4575	-62.2559	-57.9834	-58.8989
-89.1113	-76.9043	-85.4492	-79.3457	-64.3921	-67.4438	-67.749	-61.3403	-61.3403	-55.8472	-58.2886	-58.8989	-60.1196	-53.7109	-65.918	-57.6782	-58.8989
-88.501	-76.9043	-83.9233	-82.3975	-66.5283	-66.8335	-66.8335	-61.6455	-63.1714	-56.7627	-55.542	-58.8989	-64.0869	-55.2368	-63.1714	-55.542	-58.8989
-87.2803	-79.3457	-86.9751	-79.3457	-65.918	-67.1387	-67.4438	-60.73	-62.2559	-58.2886	-57.9834	-59.2041	-61.0352	-56.4575	-61.6455	-55.8472	-58.2886
-87.8906	-81.7871	-87.2803	-81.4819	-63.7817	-68.6646	-68.3594	-61.6455	-60.1196	-58.5938	-60.4248	-55.8472	-58.8989	-55.8472	-63.4766	-55.2368	-54.6265
-88.8062	-78.4302	-83.9233	-81.4819	-65.3076	-65.3076	-67.4438	-62.561	-62.561	-61.6455	-58.8989	-52.7954	-62.8662	-55.2368	-61.6455	-54.3213	-55.542
-87.5854	-77.5147	-85.144	-79.6509	-67.4438	-68.9697	-67.4438	-62.561	-61.9507	-60.73	-58.5938	-56.1523	-60.4248	-57.0679	-61.0352	-57.0679	-54.6265
-85.4492	-79.0405	-88.501	-77.5147	-65.3076	-71.106	-68.3594	-63.4766	-61.3403	-61.3403	-59.8145	-53.4058	-60.73	-57.9834	-61.9507	-57.373	-56.1523
-86.0596	-80.2612	-86.3648	-78.7353	-66.2231	-65.6128	-66.5283	-62.8662	-63.7817	-62.2559	-55.8472	-52.4902	-63.1714	-61.0352	-62.561	-55.2368	-57.9834
-86.9751	-78.125	-85.144	-79.3457	-68.9697	-66.5283	-65.6128	-62.8662	-61.6455	-61.3403	-56.1523	-54.0161	-60.4248	-60.1196	-60.4248	-55.2368	-57.6782
-88.501	-77.8198	-84.8389	-75.9888	-65.918	-68.0542	-67.749	-60.73	-61.9507	-59.2041	-61.3403	-53.4058	-57.9834	-58.5938	-61.9507	-57.6782	-59.2041
-87.5854	-80.8716	-85.7544	-77.5147	-66.8335	-66.8335	-66.8335	-63.4766	-64.0869	-56.1523	-59.5093	-53.1006	-61.9507	-59.5093	-62.8662	-56.1523	-58.2886
-85.4492	-80.2612	-86.0596	-78.4302	-68.0542	-67.749	-63.7817	-62.8662	-60.4248	-57.0679	-56.1523	-54.3213	-61.0352	-60.4248	-60.4248	-56.7627	-58.8989
-89.4165	-80.2612	-86.0596	-78.4302	-65.3076	-69.5801	-66.2231	-62.561	-58.8989	-58.8989	-59.8145	-51.8799	-60.4248	-61.6455	-60.4248	-56.1523	-57.0679
-86.9751	-79.6509	-86.6699	-77.8198	-65.6128	-66.8335	-65.918	-65.3076	-61.3403	-59.2041	-58.8989	-51.2695	-64.3921	-61.3403	-62.2559	-53.4058	-57.373
-86.0596	-81.1768	-85.144	-78.4302	-65.918	-65.3076	-65.0024	-64.3921	-63.4766	-57.9834	-58.2886	-55.542	-65.918	-60.1196	-60.4248	-54.9316	-58.8989
-86.6699	-79.9561	-86.6699	-78.125	-62.8662	-66.8335	-66.8335	-63.1714	-61.0352	-58.2886	-60.4248	-54.0161	-64.0869	-61.3403	-60.1196	-56.4575	-58.8989
-85.7544	-80.2612	-84.2285	-78.7353	-65.0024	-66.2231	-65.918	-64.3921	-61.6455	-59.2041	-60.4248	-51.8799	-66.5283	-61.9507	-61.0352	-54.6265	-60.1196
-85.144	-79.6509	-82.7026	-81.4819	-69.5801	-66.8335	-65.3076	-64.6973	-61.9507	-59.2041	-57.9834	-54.0161	-67.4438	-61.3403	-59.8145	-52.4902	-62.2559
-83.313	-78.125	-85.7544	-79.6509	-65.0024	-67.4438	-66.2231	-63.1714	-61.6455	-60.1196	-58.2886	-57.0679	-65.3076	-62.561	-59.5093	-55.542	-61.0352
-86.0596	-77.2095	-83.9233	-80.8716	-62.8662	-65.6128	-67.749	-63.7817	-63.4766	-61.0352	-59.5093	-50.9644	-63.7817	-62.8662	-61.9507	-55.8472	-63.1714
-86.6699	-76.9043	-81.7871	-82.0923	-65.6128	-66.2231	-65.0024	-62.8662	-63.7817	-63.1714	-59.2041	-50.0488	-66.5283	-60.73	-59.8145	-54.6265	-61.0352
-88.1958	-78.125	-81.1768	-81.7871	-65.3076	-70.8008	-65.918	-65.3076	-61.3403	-62.2559	-61.0352	-53.1006	-64.0869	-61.6455	-59.5093	-57.9834	-59.2041
-85.7544	-78.4302	-81.4819	-81.1768	-63.1714	-71.106	-69.5801	-68.9697	-59.5093	-61.6455	-60.4248	-54.3213	-65.3076	-61.0352	-60.4248	-58.2886	-60.1196
-83.9233	-78.7353	-78.4302	-82.0923	-65.6128	-67.749	-61.6455	-67.749	-61.6455	-63.1714	-57.6782	-51.8799	-66.2231	-57.6782	-58.8989	-57.373	-60.4248
-85.7544	-81.1768	-78.7353	-82.0923	-65.0024	-70.1904	-62.561	-65.6128	-61.6455	-60.73	-56.4575	-51.8799	-63.7817	-58.2886	-58.2886	-57.9834	-60.1196
-87.2803	-81.7871	-78.125	-81.1768	-63.1714	-69.8852	-65.6128	-62.8662	-60.4248	-61.6455	-58.8989	-52.4902	-62.8662	-58.8989	-61.0352	-57.373	-60.73
-87.5854	-79.9561	-78.4302	-83.6182	-66.2231	-66.8335	-61.6455	-63.7817	-61.6455	-61.3403	-58.8989	-54.0161	-66.2231	-59.2041	-62.561	-53.4058	-60.73
-84.5337	-80.8716	-80.5664	-83.9233	-66.5283	-63.1714	-64.0869	-63.4766	-58.5938	-62.2559	-59.8145	-56.1523	-65.3076	-56.7627	-61.9507	-56.1523	-60.1196
-84.2285	-79.9561	-79.9561	-82.0923	-63.7817	-64.3921	-64.6973	-63.1714	-58.8989	-62.2559	-61.3403	-52.7954	-61.3403	-58.5938	-61.9507	-57.9834	-56.4575
-83.9233	-79.9561	-79.9561	-81.1768	-66.5283	-63.4766	-63.7817	-63.1714	-60.73	-62.2559	-58.2886	-49.1333	-63.4766	-59.8145	-63.1714	-56.7627	-57.9834
-84.2285	-78.7353	-79.3457	-82.3975	-66.5283	-65.0024	-63.7817	-63.4766	-62.561	-62.2559	-60.73	-54.0161	-62.561	-59.5093	-61.9507	-58.2886	-58.5938
-86.0596	-78.125	-79.6509	-81.7871	-67.1387	-68.3594	-65.6128	-63.4766	-58.5938	-62.561	-62.561	-55.542	-61.3403	-61.3403	-60.4248	-58.2886	-58.2886
-85.7544	-79.0405	-77.8198	-81.7871	-68.6646	-65.3076	-64.0869	-63.7817	-60.1196	-62.2559	-58.8989	-51.8799	-63.1714	-59.8145	-60.73	-55.2368	-58.8989
-86.0596	-79.3457	-79.6509	-84.5337	-66.5283	-67.749	-65.0024	-62.2559	-59.8145	-60.4248	-57.6782	-53.4058	-62.2559	-57.0679	-58.8989	-53.4058	-58.2886
-85.7544	-77.2095	-83.0078	-81.1768	-63.1714	-68.9697	-68.0542	-59.8145	-58.2886	-61.0352	-58.5938	-52.1851	-61.0352	-55.8472	-59.5093	-58.2886	-58.8989
-86.6699	-78.4302	-81.4819	-82.3975	-65.0024	-65.918	-68.0542	-62.2559	-64.0869	-63.7817	-57.0679	-52.1851	-61.9507	-56.7627	-58.8989	-56.1523	-59.8145
-86.6699	-77.2095	-80.5664	-82.3975	-69.2749	-64.0869	-65.3076	-64.3921	-63.4766	-61.3403	-57.9834	-54.3213	-62.561	-56.4575	-58.5938	-55.8472	-60.1196
-89.4165	-76.2939	-82.7026	-82.7026	-64.0869	-66.5283	-67.1387	-64.3921	-60.73	-60.73	-60.1196	-54.0161	-59.8145	-57.6782	-59.5093	-58.5938	-58.2886
-90.332	-76.9043	-82.3975	-79.9561	-65.0024	-65.3076	-66.5283	-65.3076	-59.2041	-59.5093	-60.4248	-51.8799	-65.918	-56.1523	-61.9507	-56.7627	-58.2886
-87.2803	-76.9043	-79.6509	-82.0923	-64.6973	-63.4766	-64.6973	-66.8335	-62.561	-59.8145	-58.8989	-54.0161	-64.3921	-54.9316	-60.1196	-55.2368	-57.9834
-89.4165	-75.9888	-80.5664	-80.5664	-62.8662	-66.5283	-65.918	-62.8662	-58.8989	-59.5093	-59.5093	-54.0161	-60.73	-56.4575	-60.73	-57.9834	-55.8472
-88.8062	-77.8198	-79.9561	-79.9561	-64.3921	-65.0024	-65.918	-62.561	-61.3403	-59.2041	-58.8989	-53.1006	-61.0352	-55.8472	-59.5093	-59.5093	-57.373
-86.3648	-79.3457	-79.9561	-82.3975	-65.6128	-62.561	-61.9507	-64.0869	-63.7817	-60.1196	-57.373	-52.7954	-64.0869	-58.2886	-55.8472	-55.2368	-57.6782
-86.0596	-80.2612	-81.4819	-81.1768	-62.8662	-65.0024	-63.1714	-62.2559	-62.2559	-60.4248	-60.1196	-52.7954	-63.4766	-57.373	-57.0679	-57.6782	-57.373
-87.2803	-80.8716	-84.2285	-81.4819	-63.1714	-63.4766	-65.918	-63.1714	-61.9507	-62.561	-61.3403	-52.1851	-63.7817	-57.0679	-59.5093	-54.9316	-56.1523
-84.5337	-81.4819	-83.9233	-82.7026	-67.749	-63.4766	-64.0869	-62.8662	-61.9507	-61.0352	-58.2886	-52.4902	-63.7817	-53.1006	-59.5093	-52.4902	-57.9834
-85.4492	-81.1768	-82.7026	-81.4819	-64.3921	-66.2231	-65.3076	-63.4766	-64.0869	-60.4248	-59.5093	-53.1006	-59.8145	-50.354	-60.4248	-54.3213	-56.4575
-88.1958	-81.7871	-83.313	-78.4302	-63.4766	-66.8335	-65.6128	-63.7817	-63.1714	-60.4248	-61.6455	-51.5747	-59.5093	-52.7954	-61.6455	-55.2368	-57.0679
-83.9233	-80.2612	-81.1768	-79.6509	-65.6128	-64.0869	-62.8662	-64.0869	-65.3076	-60.1196	-59.8145	-52.1851	-61.0352	-51.8799	-60.1196	-52.1851	-58.2886
-83.9233	-80.2612	-80.5664	-83.313	-65.3076	-64.0869	-61.0352	-63.4766	-64.3921	-56.7627	-59.5093	-54.0161	-57.6782	-52.7954	-59.8145	-54.0161	-56.4575
-85.144	-81.1768	-78.4302	-81.4819	-63.4766	-64.0869	-64.0869	-65.3076	-62.2559	-57.9834	-60.4248	-52.1851	-58.5938	-53.7109	-60.73	-56.1523	-56.4575
-83.9233	-82.3975	-79.3457	-79.3457	-65.0024	-61.6455	-60.73	-64.3921	-61.6455	-60.1196	-57.373	-53.7109	-61.0352	-53.1006	-61.3403	-52.4902	-57.373
-80.5664	-83.0078	-79.9561	-79.3457	-65.6128	-64.3921	-62.8662	-63.1714	-60.1196	-60.73	-56.1523	-56.4575	-60.4248	-53.1006	-60.73	-54.0161	-59.8145
-84.2285	-80.8716	-78.7353	-78.4302	-63.7817	-66.5283	-64.6973	-62.561	-61.0352	-61.0352	-59.8145	-54.9316	-59.2041	-52.7954	-61.3403	-52.7954	-58.5938
-86.3648	-80.8716	-78.4302	-78.7353	-65.3076	-64.0869	-63.1714	-61.3403	-64.3921	-58.5938	-57.373	-55.542	-61.6455	-52.1851	-60.73	-51.8799	-55.542
-86.0596	-80.8716	-78.7353	-83.0078	-65.3076	-61.9507	-61.3403	-62.2559	-62.8662	-58.2886	-57.373	-57.0679	-59.5093	-52.7954	-59.5093	-50.6592	-57.373
-88.8062	-80.2612	-82.3975	-83.0078	-62.2559	-63.1714	-64.0869	-63.4766	-58.8989	-59.5093	-61.0352	-55.2368	-57.9834	-55.542	-59.5093	-54.9316	-59.5093
-87.8906	-79.3457	-81.7871	-79.9561	-63.7817	-61.0352	-62.8662	-62.2559	-60.4248	-61.3403	-59.8145	-53.7109	-62.2559	-54.3213	-60.4248	-55.2368	-58.8989
-87.5854	-81.1768	-80.5664	-81.4819	-65.0024	-61.0352	-59.8145	-61.3403	-61.9507	-60.4248	-57.9834	-55.2368	-61.0352	-54.0161	-60.4248	-54.0161	-56.7627
-84.8389	-80.8716	-82.3975	-79.3457	-64.3921	-63.7817	-65.0024	-60.73	-59.5093	-60.4248	-59.5093	-54.3213	-57.0679	-54.0161	-61.9507	-57.0679	-59.2041
-88.501	-78.4302	-81.1768	-81.1768	-66.8335	-61.3403	-64.6973	-61.6455	-61.6455	-59.8145	-60.4248	-54.0161	-61.3403	-57.373	-63.1714	-53.7109	-57.0679
-86.6699	-79.6509	-81.4819	-81.1768	-68.3594	-63.7817	-61.0352	-62.2559	-60.4248	-57.0679	-56.1523	-55.2368	-61.3403	-55.8472	-62.2559	-53.4058	-54.9316
-85.4492	-80.5664	-79.6509	-78.4302	-62.561	-65.918	-64.0869	-64.3921	-57.6782	-58.8989	-58.2886	-55.2368	-57.9834	-55.8472	-60.73	-56.4575	-56.1523
-87.5854	-79.3457	-77.2095	-77.8198	-65.0024	-63.7817	-67.749	-63.1714	-61.9507	-59.5093	-59.8145	-51.5747	-59.8145	-55.542	-61.3403	-55.542	-57.6782
-84.8389	-79.6509	-77.8198	-81.1768	-67.749	-63.4766	-64.3921	-61.6455	-63.1714	-58.2886	-59.2041	-52.4902	-62.2559	-54.9316	-58.8989	-53.1006	-56.7627
-85.4492	-79.6509	-78.4302	-80.2612	-63.1714	-65.3076	-63.7817	-60.4248	-57.373	-59.2041	-60.4248	-54.3213	-58.5938	-57.9834	-59.5093	-55.2368	-56.4575
-87.2803	-76.9043	-78.7353	-77.8198	-62.8662	-65.0024	-65.0024	-60.4248	-59.8145	-60.4248	-58.8989	-52.4902	-58.5938	-58.2886	-61.6455	-54.3213	-55.8472
-86.0596	-77.8198	-78.7353	-79.3457	-63.7817	-61.9507	-63.7817	-60.73	-62.8662	-59.2041	-57.0679	-55.542	-60.1196	-58.8989	-60.73	-52.7954	-54.3213
-84.8389	-77.8198	-80.8716	-79.6509	-62.561	-62.561	-65.0024	-61.0352	-61.6455	-59.2041	-58.8989	-56.4575	-59.8145	-58.8989	-59.5093	-54.6265	-56.4575
-86.6699	-76.5991	-79.0405	-78.7353	-61.0352	-61.6455	-68.6646	-60.1196	-61.6455	-59.5093	-60.73	-52.7954	-61.0352	-57.9834	-61.0352	-54.9316	-57.0679
-86.6699	-77.2095	-77.8198	-79.3457	-66.5283	-62.561	-64.6973	-60.1196	-61.3403	-57.9834	-58.5938	-51.8799	-62.8662	-59.5093	-61.0352	-52.4902	-54.3213
-83.313	-76.9043	-81.7871	-80.2612	-63.4766	-63.7817	-66.2231	-60.73	-63.1714	-57.6782	-59.8145	-54.0161	-60.4248	-58.8989	-58.2886	-52.7954	-54.3213
-85.144	-76.2939	-80.5664	-75.6836	-61.3403	-63.7817	-68.3594	-61.0352	-61.9507	-58.5938	-61.9507	-54.3213	-60.1196	-60.1196	-58.5938	-56.4575	-54.9316
-84.8389	-78.4302	-79.6509	-76.5991	-64.0869	-62.561	-64.6973	-61.9507	-65.6128	-60.4248	-59.5093	-52.1851	-62.2559	-56.7627	-61.0352	-55.8472	-56.4575
-82.0923	-80.8716	-80.5664	-80.2612	-62.2559	-63.4766	-65.0024	-62.561	-61.9507	-58.8989	-56.4575	-52.4902	-61.6455	-58.5938	-61.6455	-55.2368	-56.1523
-82.7026	-79.3457	-80.5664	-75.6836	-61.9507	-65.6128	-68.6646	-61.0352	-60.73	-59.5093	-59.8145	-52.4902	-60.1196	-59.5093	-60.4248	-57.6782	-55.542
-87.5854	-78.4302	-77.2095	-78.125	-63.4766	-60.4248	-67.749	-61.3403	-61.9507	-57.6782	-59.2041	-53.7109	-62.561	-58.5938	-59.8145	-55.8472	-54.3213
-85.4492	-79.0405	-79.9561	-79.0405	-62.2559	-61.0352	-64.6973	-61.6455	-64.0869	-57.6782	-57.6782	-55.2368	-60.1196	-58.2886	-59.8145	-56.4575	-53.4058
-84.8389	-77.8198	-80.2612	-77.5147	-61.3403	-60.4248	-66.8335	-61.9507	-62.8662	-59.8145	-61.0352	-54.3213	-57.373	-59.5093	-60.4248	-56.4575	-56.1523
-87.8906	-77.2095	-79.0405	-77.2095	-64.0869	-59.8145	-67.4438	-63.7817	-63.1714	-58.8989	-58.5938	-53.1006	-61.0352	-59.5093	-61.9507	-54.6265	-57.6782
-83.9233	-77.2095	-77.8198	-75.6836	-63.1714	-57.0679	-67.749	-63.7817	-62.2559	-59.2041	-57.0679	-53.1006	-61.3403	-58.5938	-59.8145	-53.1006	-56.4575
-83.0078	-78.7353	-79.3457	-73.8525	-61.0352	-61.0352	-70.4956	-63.1714	-60.1196	-57.0679	-60.4248	-50.9644	-61.3403	-60.73	-58.2886	-56.4575	-54.6265
-84.8389	-76.9043	-80.2612	-73.2422	-62.2559	-61.0352	-68.0542	-63.7817	-60.73	-58.5938	-61.3403	-51.5747	-62.8662	-61.3403	-61.3403	-54.9316	-54.3213
-83.313	-78.125	-78.4302	-79.0405	-63.4766	-63.1714	-64.6973	-63.1714	-60.73	-55.8472	-58.2886	-53.1006	-59.5093	-59.5093	-59.8145	-50.0488	-54.6265
-84.5337	-78.4302	-79.9561	-79.9561	-62.8662	-65.918	-66.2231	-60.73	-57.373	-57.0679	-59.2041	-54.3213	-57.0679	-57.9834	-60.1196	-54.0161	-54.9316
-87.5854	-78.4302	-79.3457	-77.8198	-64.0869	-60.4248	-68.3594	-59.8145	-60.1196	-58.2886	-60.73	-53.1006	-60.4248	-56.7627	-59.8145	-54.6265	-56.4575
-85.4492	-80.2612	-77.8198	-78.4302	-65.918	-60.73	-65.6128	-61.0352	-60.73	-57.9834	-59.5093	-54.9316	-61.9507	-57.373	-59.5093	-50.0488	-55.8472
-84.8389	-79.0405	-81.1768	-79.0405	-63.4766	-63.4766	-65.3076	-60.73	-57.0679	-57.373	-61.0352	-56.7627	-59.5093	-57.6782	-58.2886	-53.1006	-56.1523
-88.1958	-77.8198	-79.0405	-75.6836	-60.4248	-63.7817	-67.1387	-63.1714	-57.373	-56.7627	-59.2041	-52.1851	-60.73	-58.2886	-61.6455	-54.9316	-55.542
-86.0596	-78.125	-78.125	-76.9043	-61.6455	-60.73	-66.8335	-63.4766	-59.2041	-55.8472	-56.4575	-52.4902	-62.2559	-56.4575	-62.2559	-52.4902	-55.8472
-85.7544	-78.4302	-79.0405	-79.3457	-60.1196	-60.4248	-64.6973	-60.73	-59.8145	-54.3213	-59.2041	-52.1851	-58.5938	-57.9834	-60.73	-51.8799	-58.8989
-87.8906	-79.6509	-79.6509	-76.2939	-63.4766	-61.6455	-63.4766	-60.4248	-57.6782	-57.9834	-60.73	-50.9644	-57.6782	-58.2886	-61.3403	-56.4575	-56.4575
-85.4492	-81.7871	-79.3457	-78.125	-68.9697	-58.8989	-62.8662	-59.8145	-60.73	-57.9834	-58.8989	-50.6592	-60.1196	-61.0352	-60.4248	-53.1006	-54.6265
-81.4819	-81.4819	-79.0405	-79.9561	-65.6128	-65.0024	-63.7817	-60.4248	-59.2041	-57.6782	-58.8989	-52.4902	-58.5938	-58.8989	-60.1196	-51.5747	-55.2368
-85.4492	-77.5147	-79.6509	-77.8198	-61.6455	-64.0869	-68.0542	-58.8989	-58.5938	-57.9834	-61.6455	-49.4385	-60.4248	-57.373	-58.8989	-56.7627	-55.2368
-85.144	-79.6509	-80.5664	-75.6836	-65.3076	-62.8662	-65.918	-58.8989	-58.5938	-57.9834	-59.5093	-48.523	-62.561	-55.8472	-60.4248	-54.3213	-53.7109
-83.313	-79.9561	-81.4819	-77.2095	-62.561	-62.561	-61.9507	-58.8989	-58.8989	-57.9834	-57.373	-53.4058	-59.5093	-54.6265	-57.9834	-53.7109	-54.9316
-85.144	-78.7353	-80.8716	-76.9043	-58.2886	-63.4766	-65.6128	-60.73	-58.5938	-59.2041	-58.2886	-53.7109	-58.8989	-57.0679	-57.373	-55.2368	-55.2368
-87.5854	-78.7353	-79.6509	-76.5991	-62.561	-61.9507	-66.5283	-61.3403	-60.1196	-62.2559	-60.73	-52.1851	-61.6455	-56.4575	-58.2886	-57.0679	-54.3213
-84.2285	-79.9561	-78.4302	-79.6509	-63.7817	-64.0869	-63.4766	-61.9507	-59.8145	-61.9507	-60.4248	-53.7109	-59.2041	-57.6782	-56.4575	-54.6265	-53.7109
-84.5337	-78.7353	-81.7871	-75.9888	-63.1714	-65.3076	-66.8335	-60.4248	-59.2041	-59.8145	-61.0352	-51.5747	-56.7627	-57.6782	-58.8989	-56.7627	-57.0679
-85.144	-77.5147	-81.1768	-75.9888	-63.4766	-62.2559	-66.8335	-59.2041	-62.8662	-60.1196	-58.2886	-49.4385	-61.6455	-58.8989	-57.373	-55.542	-54.3213
-83.0078	-79.6509	-80.2612	-78.7353	-64.0869	-63.7817	-64.3921	-58.8989	-61.9507	-61.6455	-57.9834	-56.4575	-63.4766	-60.73	-56.1523	-54.0161	-52.4902
-84.2285	-78.4302	-82.3975	-78.7353	-64.0869	-66.8335	-65.918	-61.0352	-61.9507	-61.9507	-60.4248	-55.2368	-61.6455	-57.6782	-56.1523	-56.4575	-57.6782
-89.1113	-76.9043	-79.6509	-78.125	-64.3921	-63.4766	-67.4438	-63.4766	-61.9507	-60.4248	-60.1196	-51.2695	-63.7817	-57.373	-57.373	-57.6782	-56.1523
-85.4492	-79.3457	-79.0405	-79.6509	-63.4766	-65.6128	-65.0024	-62.561	-60.73	-61.3403	-60.4248	-50.354	-63.7817	-56.4575	-56.4575	-55.8472	-57.6782
-85.144	-77.2095	-79.6509	-80.5664	-60.73	-66.8335	-62.8662	-60.73	-59.8145	-60.4248	-59.5093	-51.8799	-60.73	-57.9834	-56.4575	-55.542	-57.0679
-86.9751	-78.4302	-82.0923	-77.8198	-63.7817	-65.918	-64.3921	-60.73	-59.2041	-58.5938	-58.5938	-51.8799	-62.8662	-56.7627	-59.5093	-56.1523	-56.4575
-85.7544	-80.2612	-80.8716	-82.0923	-64.3921	-63.7817	-62.8662	-64.0869	-60.73	-60.4248	-59.5093	-53.7109	-62.8662	-54.3213	-59.2041	-53.7109	-54.9316
-85.4492	-81.4819	-80.2612	-79.3457	-63.1714	-68.0542	-63.7817	-63.4766	-57.6782	-59.8145	-60.73	-53.7109	-59.8145	-57.373	-57.6782	-53.7109	-57.373
-86.9751	-79.6509	-81.4819	-78.125	-64.0869	-67.1387	-65.6128	-62.2559	-59.2041	-58.8989	-61.3403	-51.2695	-61.0352	-58.5938	-56.7627	-57.9834	-57.6782
-84.8389	-80.2612	-82.7026	-80.8716	-67.4438	-66.2231	-64.0869	-61.3403	-60.4248	-57.9834	-57.6782	-50.6592	-62.8662	-57.6782	-58.2886	-54.6265	-53.7109
-83.9233	-79.9561	-83.9233	-81.1768	-67.1387	-70.4956	-64.3921	-61.9507	-59.8145	-58.5938	-58.8989	-51.2695	-59.8145	-56.4575	-56.7627	-54.0161	-57.373
-87.8906	-80.5664	-81.7871	-77.8198	-65.6128	-68.6646	-66.8335	-65.918	-64.0869	-56.7627	-59.2041	-50.354	-60.73	-57.373	-58.2886	-55.8472	-57.9834
-85.4492	-81.7871	-80.8716	-78.4302	-65.918	-67.749	-69.5801	-67.4438	-64.3921	-56.1523	-58.5938	-52.1851	-62.561	-56.1523	-61.3403	-55.2368	-57.373
-84.2285	-81.4819	-78.125	-80.8716	-61.9507	-68.9697	-67.749	-64.3921	-61.9507	-58.5938	-60.1196	-54.3213	-61.3403	-56.4575	-58.8989	-53.7109	-57.6782
-87.2803	-79.9561	-80.2612	-76.5991	-63.4766	-69.2749	-66.5283	-62.561	-59.2041	-56.7627	-61.6455	-54.6265	-61.3403	-58.2886	-59.5093	-55.542	-58.5938
-87.8906	-79.0405	-79.9561	-79.9561	-67.1387	-66.8335	-65.918	-65.0024	-62.8662	-59.8145	-60.73	-52.7954	-65.3076	-55.8472	-59.5093	-54.9316	-56.7627
-83.6182	-79.3457	-81.1768	-80.2612	-66.5283	-69.2749	-65.0024	-65.6128	-60.1196	-60.1196	-58.5938	-54.0161	-62.2559	-56.1523	-57.9834	-52.4902	-57.0679
-83.9233	-76.9043	-76.9043	-76.9043	-65.3076	-71.4111	-66.8335	-64.3921	-58.5938	-59.5093	-59.5093	-51.5747	-61.0352	-57.0679	-55.8472	-54.0161	-59.8145
-83.6182	-79.0405	-78.4302	-77.5147	-68.9697	-66.5283	-68.0542	-65.6128	-61.9507	-58.5938	-58.5938	-51.8799	-64.6973	-56.1523	-57.373	-54.0161	-58.8989
-79.6509	-79.9561	-80.5664	-79.6509	-67.1387	-68.9697	-64.0869	-66.5283	-61.9507	-56.7627	-58.2886	-54.3213	-65.6128	-56.1523	-55.8472	-53.1006	-58.5938
-84.2285	-79.0405	-79.9561	-77.2095	-66.5283	-69.8852	-67.1387	-65.3076	-61.0352	-59.2041	-59.5093	-55.2368	-61.9507	-57.6782	-55.542	-53.1006	-59.2041
-86.3648	-77.5147	-79.0405	-75.9888	-68.3594	-70.1904	-67.4438	-65.3076	-61.3403	-58.2886	-58.2886	-50.6592	-63.7817	-56.7627	-58.5938	-52.4902	-58.2886
-82.3975	-78.125	-78.7353	-79.6509	-66.5283	-71.106	-64.6973	-62.8662	-62.561	-59.8145	-59.8145	-53.1006	-62.8662	-56.4575	-57.6782	-49.4385	-59.8145
-83.6182	-77.8198	-81.1768	-77.8198	-66.5283	-70.8008	-67.4438	-62.8662	-60.1196	-59.2041	-62.8662	-51.8799	-60.73	-60.1196	-56.7627	-51.8799	-61.9507
-84.8389	-77.2095	-79.3457	-75.6836	-67.4438	-69.2749	-67.749	-68.0542	-60.73	-58.8989	-64.6973	-52.1851	-61.9507	-58.5938	-54.9316	-54.0161	-62.2559
-85.144	-79.0405	-79.9561	-79.3457	-69.5801	-67.4438	-68.0542	-67.1387	-64.0869	-59.2041	-63.1714	-54.3213	-64.6973	-56.1523	-56.7627	-51.8799	-60.73
-83.6182	-79.3457	-78.4302	-79.0405	-66.5283	-69.2749	-67.749	-65.6128	-61.3403	-61.9507	-61.0352	-52.4902	-61.0352	-57.9834	-57.0679	-53.4058	-59.5093
-84.2285	-78.125	-79.6509	-77.2095	-68.6646	-67.4438	-70.1904	-65.3076	-59.2041	-61.6455	-62.561	-54.3213	-62.561	-58.2886	-57.373	-53.4058	-57.0679
-81.4819	-78.125	-81.7871	-78.125	-68.0542	-67.4438	-67.1387	-67.749	-59.5093	-60.1196	-60.73	-55.2368	-65.3076	-59.5093	-57.9834	-51.8799	-59.2041
-81.7871	-79.3457	-79.9561	-77.2095	-65.3076	-68.9697	-66.8335	-67.1387	-57.6782	-58.8989	-60.4248	-57.373	-62.8662	-59.5093	-56.1523	-52.1851	-62.2559
-86.9751	-75.6836	-79.3457	-71.7163	-68.9697	-67.4438	-67.4438	-66.8335	-61.0352	-54.9316	-58.8989	-55.8472	-62.2559	-57.9834	-58.2886	-54.0161	-60.4248
-86.3648	-79.6509	-78.4302	-74.7681	-71.106	-67.4438	-67.749	-66.8335	-63.4766	-58.8989	-61.0352	-54.9316	-63.4766	-56.7627	-58.8989	-54.6265	-58.2886
-83.313	-77.8198	-80.8716	-75.0732	-67.749	-70.4956	-68.3594	-64.3921	-60.73	-59.2041	-60.1196	-53.7109	-62.561	-58.2886	-57.6782	-53.4058	-60.73
-85.7544	-74.7681	-79.3457	-71.7163	-68.0542	-70.1904	-67.4438	-66.5283	-61.0352	-58.5938	-58.8989	-54.0161	-62.2559	-57.6782	-59.2041	-55.542	-61.6455
-86.9751	-75.6836	-78.125	-75.0732	-71.106	-67.4438	-66.8335	-69.2749	-61.9507	-59.2041	-59.2041	-57.6782	-65.918	-55.8472	-58.2886	-53.1006	-61.3403
-83.6182	-77.5147	-77.5147	-76.2939	-68.9697	-70.8008	-65.918	-67.4438	-59.8145	-62.2559	-57.9834	-57.9834	-66.2231	-58.2886	-57.373	-53.1006	-62.561
-87.5854	-76.5991	-76.5991	-71.7163	-68.9697	-68.9697	-68.3594	-66.8335	-59.2041	-63.1714	-59.8145	-58.2886	-64.0869	-60.73	-54.6265	-56.4575	-62.2559
-87.2803	-75.6836	-76.9043	-74.4629	-70.4956	-67.749	-68.3594	-66.8335	-61.6455	-61.0352	-57.6782	-58.5938	-67.4438	-59.5093	-58.2886	-56.7627	-60.1196
-86.0596	-77.2095	-77.2095	-78.4302	-67.1387	-70.1904	-65.0024	-65.3076	-61.3403	-61.3403	-61.3403	-58.2886	-66.8335	-59.8145	-58.8989	-56.1523	-62.561
-85.144	-73.8525	-78.7353	-76.2939	-66.8335	-69.2749	-68.3594	-64.6973	-59.5093	-58.8989	-61.6455	-55.542	-65.0024	-59.2041	-58.8989	-56.1523	-61.6455
-86.0596	-74.1577	-80.8716	-74.7681	-68.3594	-68.6646	-68.6646	-65.918	-63.1714	-60.73	-61.0352	-57.0679	-66.2231	-59.8145	-57.0679	-53.4058	-60.1196
-84.2285	-75.6836	-81.1768	-78.7353	-70.8008	-69.5801	-64.3921	-65.3076	-63.1714	-60.1196	-60.73	-58.5938	-63.7817	-60.73	-58.2886	-54.3213	-60.73
-83.313	-76.2939	-79.6509	-74.1577	-70.1904	-69.8852	-63.4766	-65.6128	-59.2041	-59.8145	-59.2041	-58.2886	-63.1714	-60.4248	-58.2886	-59.5093	-61.9507
-83.9233	-75.9888	-78.4302	-76.9043	-68.3594	-64.6973	-66.8335	-66.8335	-63.4766	-59.5093	-59.5093	-55.542	-65.918	-58.5938	-56.7627	-56.7627	-61.0352
-81.1768	-76.2939	-79.0405	-79.3457	-67.749	-65.3076	-68.0542	-65.918	-63.1714	-57.0679	-57.373	-57.9834	-62.561	-57.6782	-55.542	-56.7627	-61.3403
-82.3975	-76.9043	-79.3457	-76.2939	-68.9697	-67.1387	-69.8852	-65.6128	-62.2559	-59.2041	-59.5093	-55.542	-61.3403	-58.5938	-53.1006	-58.8989	-62.561
-86.0596	-75.3784	-80.5664	-77.2095	-70.4956	-64.0869	-69.8852	-66.2231	-64.6973	-59.5093	-59.2041	-54.0161	-62.2559	-57.0679	-57.0679	-57.9834	-57.9834
-84.8389	-77.5147	-81.4819	-79.6509	-68.6646	-65.0024	-65.6128	-65.918	-63.7817	-59.8145	-60.1196	-56.7627	-60.4248	-55.542	-56.4575	-55.542	-60.73
-85.7544	-76.2939	-79.6509	-76.9043	-67.1387	-68.0542	-66.5283	-68.3594	-61.3403	-58.8989	-59.2041	-55.542	-58.5938	-55.2368	-56.7627	-58.2886	-64.0869
-87.8906	-76.9043	-79.3457	-75.6836	-68.0542	-65.3076	-66.5283	-68.3594	-63.4766	-57.373	-61.9507	-53.4058	-62.8662	-56.4575	-57.9834	-63.1714	-60.4248
-86.9751	-78.7353	-80.2612	-79.3457	-67.749	-64.0869	-66.5283	-68.6646	-67.1387	-57.9834	-61.6455	-57.373	-63.4766	-57.6782	-57.0679	-58.2886	-57.6782
-86.0596	-77.8198	-81.4819	-77.5147	-66.8335	-66.2231	-68.0542	-67.4438	-62.2559	-59.5093	-61.3403	-57.6782	-61.0352	-57.6782	-55.2368	-58.5938	-59.2041
-86.6699	-76.2939	-81.7871	-75.0732	-68.9697	-65.3076	-70.1904	-67.749	-62.2559	-59.8145	-61.6455	-57.6782	-65.918	-56.1523	-56.7627	-59.2041	-60.4248
-84.2285	-77.2095	-82.0923	-77.2095	-70.8008	-64.6973	-68.9697	-66.5283	-65.6128	-59.5093	-58.2886	-58.2886	-67.4438	-55.2368	-56.4575	-57.373	-58.5938
-81.4819	-78.7353	-79.3457	-76.5991	-68.6646	-67.1387	-68.9697	-66.2231	-62.8662	-57.6782	-59.2041	-58.8989	-62.8662	-55.8472	-54.9316	-57.373	-57.9834
-83.9233	-76.2939	-79.3457	-73.2422	-68.3594	-63.4766	-70.4956	-65.918	-63.4766	-58.2886	-57.373	-56.7627	-63.7817	-58.2886	-57.9834	-58.5938	-56.1523
-84.5337	-78.7353	-81.7871	-78.125	-68.0542	-63.4766	-68.0542	-66.8335	-65.6128	-59.8145	-58.5938	-57.9834	-64.3921	-56.4575	-60.1196	-59.8145	-56.4575
-82.7026	-79.9561	-80.2612	-78.4302	-66.5283	-66.5283	-64.0869	-65.918	-64.6973	-60.73	-58.5938	-54.9316	-62.8662	-57.6782	-58.8989	-58.8989	-58.5938
-85.7544	-77.2095	-81.7871	-73.5474	-67.4438	-67.4438	-65.3076	-65.0024	-63.7817	-60.1196	-59.2041	-54.3213	-61.3403	-57.0679	-59.2041	-61.6455	-57.6782
-87.8906	-79.0405	-81.4819	-75.3784	-68.3594	-66.8335	-67.749	-64.0869	-65.918	-58.8989	-60.73	-56.7627	-63.7817	-54.9316	-59.2041	-59.2041	-53.1006
-88.1958	-80.8716	-79.3457	-76.9043	-68.3594	-69.2749	-67.749	-64.0869	-63.4766	-59.8145	-60.73	-57.373	-62.561	-56.7627	-57.373	-57.0679	-56.4575
-86.9751	-78.125	-77.8198	-76.9043	-68.6646	-67.4438	-67.749	-64.6973	-63.7817	-60.4248	-60.4248	-57.6782	-62.2559	-57.0679	-57.373	-58.2886	-57.6782
-86.3648	-76.2939	-77.8198	-75.0732	-67.1387	-66.5283	-67.749	-66.8335	-63.7817	-58.5938	-57.9834	-58.5938	-65.0024	-55.542	-57.9834	-57.9834	-55.542
-83.0078	-78.7353	-80.8716	-75.9888	-67.4438	-69.5801	-66.2231	-62.8662	-63.4766	-57.6782	-57.6782	-57.6782	-63.4766	-55.2368	-57.9834	-56.4575	-58.8989
-83.9233	-77.2095	-79.6509	-76.5991	-70.1904	-68.3594	-70.1904	-62.561	-63.4766	-55.2368	-57.0679	-54.9316	-60.4248	-57.0679	-56.4575	-59.2041	-58.2886
-88.1958	-77.2095	-80.8716	-76.9043	-68.6646	-67.4438	-70.4956	-64.0869	-65.0024	-56.7627	-57.373	-55.542	-64.0869	-54.3213	-55.8472	-58.8989	-58.2886
-86.3648	-78.125	-78.125	-79.0405	-68.6646	-68.3594	-68.0542	-65.0024	-63.1714	-54.6265	-57.0679	-58.5938	-64.0869	-54.3213	-56.4575	-55.2368	-60.4248
-85.4492	-76.2939	-78.4302	-76.9043	-69.2749	-69.5801	-67.749	-65.6128	-63.1714	-56.7627	-57.0679	-58.8989	-61.6455	-53.4058	-58.5938	-58.2886	-58.8989
-86.0596	-79.0405	-81.1768	-74.7681	-70.4956	-66.8335	-68.9697	-66.5283	-65.918	-59.2041	-57.9834	-57.9834	-65.0024	-53.1006	-60.1196	-59.2041	-56.1523
-85.7544	-80.2612	-80.2612	-77.8198	-70.8008	-67.749	-68.9697	-66.8335	-62.2559	-57.0679	-59.2041	-57.6782	-64.0869	-53.7109	-60.73	-57.9834	-56.1523
-86.6699	-78.125	-80.2612	-75.3784	-70.8008	-69.8852	-68.3594	-63.1714	-61.0352	-58.2886	-59.8145	-56.1523	-62.561	-54.3213	-57.9834	-56.7627	-58.8989
-90.0269	-75.9888	-80.8716	-73.8525	-71.4111	-65.6128	-68.6646	-63.7817	-63.4766	-59.8145	-60.73	-55.2368	-64.3921	-56.7627	-57.9834	-60.1196	-57.6782
-86.0596	-77.5147	-82.0923	-74.7681	-72.0215	-65.6128	-69.5801	-63.1714	-62.561	-59.2041	-59.5093	-54.9316	-65.3076	-57.0679	-60.73	-57.9834	-58.2886
-86.3648	-78.4302	-77.2095	-74.1577	-70.8008	-66.8335	-70.4956	-64.6973	-62.2559	-60.73	-57.0679	-54.0161	-61.0352	-57.6782	-60.1196	-58.5938	-57.9834
-90.332	-77.2095	-78.4302	-72.937	-69.8852	-66.5283	-71.7163	-64.3921	-64.0869	-59.8145	-60.4248	-54.6265	-63.4766	-57.6782	-58.8989	-60.4248	-56.4575
-87.5854	-78.4302	-77.8198	-75.6836	-70.1904	-68.3594	-68.3594	-65.3076	-63.7817	-57.373	-59.8145	-57.373	-66.5283	-55.8472	-58.2886	-57.0679	-56.4575
-86.9751	-77.5147	-79.3457	-75.0732	-69.8852	-70.8008	-68.6646	-63.7817	-61.0352	-56.4575	-58.8989	-59.2041	-61.6455	-59.8145	-57.373	-58.8989	-58.2886
-88.1958	-75.0732	-79.0405	-76.2939	-69.5801	-67.1387	-69.5801	-64.0869	-61.3403	-58.5938	-57.0679	-57.6782	-61.9507	-57.9834	-58.2886	-58.5938	-58.8989
-87.5854	-76.9043	-78.7353	-79.6509	-68.3594	-66.5283	-71.106	-64.0869	-62.8662	-57.373	-56.1523	-56.7627	-65.0024	-55.8472	-57.6782	-57.6782	-58.8989
-84.8389	-79.6509	-78.125	-77.2095	-67.4438	-69.5801	-71.106	-61.9507	-59.8145	-58.2886	-57.373	-56.4575	-62.2559	-58.2886	-56.7627	-57.6782	-60.73
-86.9751	-76.9043	-77.8198	-72.0215	-66.5283	-68.9697	-72.937	-62.8662	-61.9507	-60.1196	-57.9834	-56.4575	-62.561	-59.2041	-55.8472	-58.5938	-59.5093
-88.8062	-77.2095	-80.8716	-75.6836	-67.749	-68.0542	-70.4956	-63.4766	-63.1714	-57.373	-58.2886	-55.2368	-65.918	-57.0679	-56.4575	-58.8989	-58.5938
-86.0596	-79.9561	-78.7353	-76.9043	-68.0542	-68.9697	-69.2749	-64.0869	-60.73	-58.5938	-58.8989	-55.2368	-63.7817	-57.9834	-56.1523	-56.1523	-59.8145
-87.5854	-77.5147	-76.9043	-76.2939	-67.1387	-68.9697	-69.5801	-64.6973	-60.1196	-59.5093	-57.6782	-55.542	-64.3921	-58.5938	-57.9834	-58.5938	-60.73
-89.1113	-78.125	-76.2939	-76.5991	-67.4438	-65.0024	-69.2749	-65.6128	-61.3403	-60.1196	-57.373	-56.7627	-65.6128	-59.8145	-59.5093	-58.8989	-58.2886
-88.501	-81.1768	-76.5991	-79.0405	-68.3594	-66.5283	-68.0542	-63.4766	-60.73	-60.1196	-56.4575	-56.4575	-65.918	-59.8145	-59.5093	-59.2041	-61.6455
-86.6699	-77.8198	-76.5991	-75.9888	-68.6646	-67.4438	-68.3594	-63.1714	-61.3403	-62.2559	-56.1523	-57.6782	-62.2559	-61.3403	-56.7627	-61.0352	-63.4766
-85.7544	-77.8198	-77.8198	-78.125	-68.9697	-64.0869	-71.106	-62.8662	-64.3921	-61.3403	-54.6265	-58.8989	-63.4766	-60.4248	-59.5093	-58.2886	-61.0352
-86.6699	-75.6836	-77.2095	-79.9561	-68.9697	-66.8335	-69.5801	-63.7817	-60.1196	-58.5938	-56.1523	-58.8989	-61.9507	-57.373	-60.4248	-56.1523	-61.3403
-86.9751	-75.0732	-75.0732	-78.125	-67.749	-67.1387	-68.6646	-63.4766	-60.73	-58.5938	-55.542	-60.1196	-61.9507	-57.373	-60.4248	-55.2368	-62.561
-85.4492	-78.125	-75.3784	-78.125	-67.749	-62.2559	-69.2749	-62.561	-61.6455	-58.2886	-54.9316	-58.5938	-64.6973	-57.6782	-62.561	-56.4575	-61.0352
-84.5337	-79.3457	-74.1577	-75.6836	-67.1387	-63.4766	-70.4956	-61.6455	-62.561	-60.1196	-57.0679	-60.1196	-65.0024	-57.0679	-61.9507	-53.7109	-61.0352
-83.6182	-76.9043	-74.7681	-77.5147	-67.749	-67.1387	-71.4111	-61.9507	-60.73	-61.6455	-57.9834	-61.0352	-62.2559	-59.8145	-61.9507	-56.4575	-61.9507
-84.5337	-76.9043	-76.5991	-76.2939	-67.749	-64.6973	-68.6646	-61.0352	-61.6455	-61.6455	-58.5938	-60.73	-63.7817	-56.1523	-61.3403	-57.373	-59.8145
-83.9233	-77.5147	-77.2095	-79.6509	-68.6646	-63.1714	-68.6646	-60.4248	-64.3921	-58.5938	-57.9834	-61.9507	-63.4766	-55.2368	-61.9507	-56.1523	-61.0352
-83.313	-75.3784	-76.9043	-78.125	-69.5801	-66.5283	-67.749	-60.1196	-63.7817	-60.73	-57.373	-61.6455	-60.1196	-57.9834	-60.73	-57.9834	-64.3921
-84.5337	-75.6836	-79.0405	-75.3784	-67.4438	-65.0024	-68.6646	-62.561	-63.4766	-60.73	-56.4575	-61.0352	-61.0352	-58.8989	-62.2559	-58.8989	-63.7817
-85.144	-77.5147	-79.3457	-79.6509	-69.5801	-64.0869	-69.2749	-63.1714	-65.3076	-57.0679	-55.8472	-60.4248	-63.4766	-57.373	-61.9507	-57.0679	-61.3403
-83.313	-76.2939	-75.9888	-77.2095	-66.5283	-66.2231	-69.8852	-61.3403	-64.6973	-58.8989	-55.8472	-61.3403	-59.8145	-58.2886	-60.1196	-55.542	-61.3403
-84.5337	-75.9888	-79.6509	-76.2939	-66.5283	-64.0869	-71.4111	-63.4766	-61.6455	-56.7627	-54.6265	-63.1714	-58.5938	-58.5938	-62.2559	-59.2041	-61.6455
-85.144	-77.8198	-79.9561	-75.6836	-67.749	-62.561	-69.5801	-63.4766	-61.9507	-57.9834	-55.542	-61.0352	-61.3403	-56.1523	-62.561	-57.6782	-59.5093
-84.2285	-76.5991	-78.125	-77.2095	-68.9697	-64.3921	-69.2749	-60.73	-61.6455	-58.8989	-55.542	-59.2041	-60.73	-56.1523	-62.2559	-57.6782	-62.2559
-84.8389	-74.7681	-77.2095	-76.5991	-67.4438	-66.2231	-70.8008	-61.6455	-62.8662	-60.4248	-54.0161	-59.8145	-59.2041	-56.1523	-61.6455	-59.2041	-62.8662
-86.3648	-76.2939	-77.8198	-75.0732	-67.4438	-63.7817	-69.8852	-64.0869	-63.7817	-60.73	-54.9316	-58.5938	-61.9507	-56.4575	-61.9507	-58.5938	-60.1196
-86.0596	-76.9043	-77.5147	-74.4629	-69.2749	-65.6128	-68.0542	-62.561	-61.6455	-57.6782	-54.6265	-59.5093	-62.2559	-54.9316	-59.8145	-57.9834	-63.4766
-86.3648	-75.6836	-75.6836	-74.7681	-69.2749	-65.6128	-71.7163	-64.0869	-62.561	-60.4248	-54.0161	-58.8989	-62.561	-57.9834	-58.5938	-57.373	-60.1196
-87.2803	-76.9043	-77.2095	-76.9043	-69.5801	-65.3076	-71.106	-66.8335	-62.8662	-58.8989	-53.1006	-59.5093	-64.3921	-58.8989	-61.0352	-58.2886	-56.7627
-84.2285	-77.2095	-75.3784	-75.6836	-68.0542	-66.2231	-70.8008	-65.918	-62.2559	-60.4248	-52.1851	-56.4575	-63.1714	-55.8472	-60.73	-60.73	-59.8145
-83.0078	-74.1577	-75.6836	-73.2422	-71.106	-65.6128	-69.8852	-63.7817	-61.3403	-62.8662	-53.7109	-54.9316	-60.4248	-57.0679	-60.73	-61.9507	-61.0352
-83.9233	-73.5474	-77.5147	-75.6836	-68.6646	-65.918	-72.0215	-62.561	-62.2559	-61.0352	-56.4575	-56.4575	-63.1714	-54.6265	-61.0352	-59.8145	-58.5938
-84.8389	-74.4629	-75.0732	-79.6509	-68.9697	-68.3594	-72.0215	-62.561	-60.4248	-61.0352	-54.6265	-56.7627	-61.3403	-53.1006	-61.6455	-56.4575	-57.373
-87.5854	-72.937	-74.4629	-76.2939	-68.3594	-66.5283	-69.5801	-66.8335	-60.4248	-60.4248	-51.2695	-59.2041	-56.4575	-53.1006	-59.2041	-59.2041	-61.3403
-86.0596	-75.3784	-76.5991	-74.1577	-68.9697	-64.3921	-69.2749	-64.0869	-60.73	-59.8145	-52.4902	-56.7627	-60.1196	-55.2368	-60.4248	-57.6782	-59.2041
-84.8389	-75.0732	-77.5147	-75.9888	-72.0215	-68.3594	-69.5801	-60.4248	-62.2559	-58.5938	-55.8472	-56.4575	-62.8662	-54.9316	-61.0352	-55.8472	-59.5093
-85.4492	-72.937	-77.8198	-74.7681	-70.1904	-68.3594	-70.1904	-61.0352	-62.2559	-60.4248	-53.4058	-55.2368	-59.8145	-56.1523	-60.1196	-57.0679	-60.4248
-86.9751	-73.8525	-79.0405	-74.4629	-71.4111	-67.1387	-70.8008	-63.7817	-62.561	-60.73	-54.6265	-55.542	-60.4248	-57.9834	-60.4248	-57.0679	-58.5938
-85.7544	-76.9043	-79.0405	-75.9888	-70.8008	-67.1387	-68.9697	-64.6973	-64.3921	-58.8989	-57.373	-54.6265	-61.9507	-56.1523	-61.0352	-56.7627	-58.2886
-85.7544	-74.4629	-76.2939	-73.5474	-70.4956	-68.9697	-68.3594	-59.5093	-62.561	-60.73	-56.7627	-53.7109	-59.8145	-57.0679	-62.8662	-57.6782	-61.9507
-84.8389	-70.1904	-77.2095	-72.3267	-69.8852	-66.2231	-67.749	-63.7817	-62.561	-61.6455	-56.4575	-56.1523	-61.6455	-58.5938	-62.8662	-57.9834	-61.0352
-84.2285	-75.0732	-80.2612	-73.8525	-71.7163	-66.8335	-67.4438	-65.918	-61.0352	-60.1196	-55.2368	-59.5093	-62.561	-56.1523	-61.6455	-54.6265	-58.2886
-86.6699	-72.3267	-78.125	-71.106	-71.4111	-69.2749	-68.0542	-64.3921	-61.9507	-62.2559	-52.4902	-58.8989	-58.2886	-54.6265	-59.8145	-54.9316	-61.0352
-86.9751	-72.3267	-75.9888	-70.4956	-69.2749	-65.918	-68.6646	-62.2559	-62.8662	-61.6455	-50.6592	-57.9834	-58.8989	-55.8472	-59.8145	-56.7627	-61.3403
-86.3648	-75.3784	-76.2939	-72.937	-70.4956	-65.918	-68.0542	-62.2559	-62.2559	-58.2886	-54.3213	-57.9834	-61.3403	-54.6265	-60.73	-55.2368	-59.5093
-83.0078	-74.4629	-73.8525	-72.3267	-73.5474	-69.5801	-68.6646	-62.561	-60.1196	-61.6455	-55.8472	-57.6782	-60.4248	-52.4902	-62.2559	-54.9316	-60.73
-84.2285	-71.4111	-76.2939	-72.937	-70.8008	-67.4438	-70.1904	-63.4766	-63.1714	-62.8662	-55.2368	-57.0679	-61.3403	-54.3213	-62.561	-57.6782	-60.1196
-86.0596	-75.0732	-78.4302	-75.6836	-69.5801	-69.2749	-70.1904	-65.3076	-65.6128	-62.8662	-54.0161	-58.2886	-65.3076	-55.8472	-61.3403	-58.5938	-57.9834
-86.3648	-74.4629	-76.2939	-77.5147	-72.3267	-72.3267	-67.1387	-64.0869	-61.9507	-63.4766	-54.6265	-59.8145	-62.8662	-55.542	-61.0352	-57.9834	-59.5093
-86.3648	-73.5474	-78.125	-74.4629	-73.2422	-70.1904	-66.2231	-63.7817	-59.2041	-65.3076	-54.0161	-57.373	-60.73	-53.4058	-60.4248	-60.73	-64.0869
-85.144	-74.4629	-79.6509	-74.1577	-73.5474	-67.4438	-64.3921	-65.3076	-61.6455	-62.8662	-54.6265	-56.7627	-64.0869	-54.3213	-60.73	-57.373	-60.1196
-86.6699	-74.4629	-78.4302	-74.4629	-70.8008	-70.1904	-65.3076	-64.0869	-62.561	-61.3403	-53.7109	-57.9834	-62.561	-54.9316	-58.8989	-53.7109	-62.561
-83.6182	-73.5474	-77.5147	-75.0732	-72.937	-70.8008	-66.8335	-62.2559	-62.2559	-64.3921	-56.7627	-56.1523	-59.2041	-55.2368	-55.8472	-56.7627	-63.1714
-84.8389	-75.9888	-81.7871	-74.1577	-73.8525	-70.1904	-65.3076	-65.0024	-62.8662	-62.2559	-57.6782	-54.6265	-58.2886	-54.0161	-57.0679	-58.5938	-58.5938
-84.2285	-77.2095	-80.2612	-75.3784	-72.937	-72.3267	-67.1387	-65.0024	-63.1714	-61.6455	-56.7627	-54.3213	-60.1196	-52.4902	-58.2886	-57.6782	-59.8145
-82.0923	-72.3267	-80.2612	-72.3267	-70.1904	-70.8008	-67.749	-65.6128	-62.561	-64.0869	-54.9316	-55.8472	-58.8989	-56.7627	-58.5938	-57.6782	-62.561
-81.7871	-74.1577	-82.7026	-74.1577	-70.1904	-68.3594	-67.1387	-64.6973	-62.2559	-62.561	-54.9316	-54.9316	-60.1196	-57.0679	-59.8145	-57.0679	-60.73
-82.3975	-76.9043	-79.0405	-77.8198	-71.106	-70.1904	-66.2231	-63.1714	-61.6455	-63.1714	-57.373	-55.8472	-61.9507	-56.1523	-60.73	-54.3213	-59.5093
-84.5337	-70.8008	-77.8198	-76.2939	-72.937	-70.4956	-65.3076	-62.2559	-62.2559	-63.7817	-58.2886	-57.6782	-58.8989	-59.5093	-58.5938	-57.9834	-62.561
-83.6182	-71.4111	-78.7353	-74.1577	-70.1904	-66.5283	-65.918	-64.6973	-64.3921	-63.1714	-56.4575	-57.6782	-59.5093	-59.5093	-58.5938	-57.9834	-58.8989
-84.5337	-75.0732	-78.4302	-75.6836	-70.1904	-69.2749	-64.6973	-63.4766	-62.561	-61.3403	-58.2886	-56.7627	-60.1196	-58.5938	-58.2886	-55.2368	-59.5093
-84.8389	-73.5474	-77.8198	-74.7681	-71.106	-69.8852	-65.0024	-61.0352	-60.1196	-64.3921	-59.5093	-55.542	-60.73	-58.8989	-55.542	-55.8472	-62.8662
-84.5337	-72.937	-80.8716	-75.0732	-68.9697	-68.0542	-66.5283	-61.0352	-61.6455	-63.7817	-58.2886	-57.6782	-57.9834	-59.8145	-57.9834	-56.1523	-61.6455
-85.144	-75.0732	-82.7026	-72.6318	-71.4111	-71.106	-66.2231	-63.1714	-60.73	-63.1714	-58.2886	-57.373	-58.8989	-56.4575	-57.6782	-55.542	-60.1196
-84.5337	-73.5474	-78.4302	-72.0215	-74.7681	-75.0732	-64.6973	-65.3076	-61.9507	-65.3076	-57.373	-55.8472	-58.2886	-57.373	-58.2886	-57.0679	-62.2559
-84.5337	-71.4111	-81.4819	-72.937	-75.6836	-70.4956	-65.0024	-64.6973	-63.1714	-65.0024	-57.0679	-54.3213	-57.9834	-59.5093	-58.2886	-58.8989	-61.9507
-85.4492	-73.2422	-82.3975	-73.8525	-72.6318	-68.3594	-65.3076	-63.1714	-61.9507	-63.1714	-60.4248	-56.4575	-57.373	-57.373	-58.8989	-57.0679	-58.5938
-84.2285	-70.1904	-79.9561	-73.2422	-72.0215	-70.8008	-65.3076	-62.8662	-60.4248	-62.8662	-59.8145	-57.0679	-56.4575	-57.0679	-59.5093	-56.4575	-60.1196
-84.8389	-70.8008	-80.2612	-70.8008	-72.0215	-68.0542	-65.6128	-65.6128	-62.2559	-66.5283	-57.6782	-55.8472	-57.373	-58.8989	-58.5938	-57.0679	-58.2886
-84.5337	-74.7681	-80.5664	-71.7163	-72.0215	-67.4438	-65.6128	-64.6973	-63.4766	-64.0869	-58.5938	-55.8472	-58.2886	-58.8989	-58.8989	-57.373	-54.3213
-84.2285	-74.1577	-80.5664	-73.8525	-73.8525	-71.4111	-65.3076	-63.4766	-61.6455	-62.561	-58.2886	-56.4575	-57.373	-57.6782	-57.6782	-56.7627	-59.5093
-82.3975	-72.3267	-80.2612	-75.6836	-71.7163	-68.3594	-66.2231	-64.0869	-63.1714	-64.3921	-54.6265	-56.4575	-59.2041	-59.2041	-56.7627	-56.4575	-59.5093
-83.0078	-74.7681	-84.5337	-75.9888	-69.8852	-66.2231	-65.918	-65.0024	-63.1714	-62.561	-54.3213	-54.0161	-60.73	-59.2041	-57.373	-54.9316	-57.0679
-84.2285	-74.1577	-81.1768	-74.1577	-69.5801	-68.9697	-68.6646	-65.6128	-61.9507	-61.3403	-54.3213	-57.9834	-60.1196	-54.9316	-57.6782	-52.4902	-58.5938
-83.6182	-71.106	-81.7871	-72.6318	-68.3594	-70.1904	-68.3594	-65.3076	-61.0352	-64.3921	-55.8472	-58.2886	-56.4575	-56.7627	-56.1523	-54.6265	-59.2041
-85.144	-72.937	-86.3648	-71.106	-70.1904	-68.3594	-68.9697	-65.0024	-61.6455	-61.9507	-56.7627	-56.4575	-58.8989	-57.9834	-56.1523	-54.6265	-57.6782
-85.7544	-74.1577	-86.0596	-71.106	-73.2422	-69.2749	-65.918	-63.7817	-60.1196	-63.7817	-54.6265	-56.7627	-60.4248	-57.0679	-55.542	-52.4902	-59.2041
-84.8389	-73.5474	-83.0078	-71.4111	-72.0215	-71.7163	-66.2231	-64.6973	-59.2041	-66.2231	-53.7109	-57.9834	-57.6782	-59.2041	-49.7437	-54.0161	-61.3403
-84.8389	-76.2939	-83.0078	-70.8008	-68.3594	-69.2749	-67.749	-63.1714	-60.73	-62.2559	-55.8472	-58.2886	-57.9834	-57.9834	-53.7109	-55.542	-60.73
-85.7544	-78.125	-82.7026	-71.4111	-71.7163	-69.8852	-66.2231	-61.9507	-61.6455	-61.0352	-56.1523	-57.0679	-59.5093	-57.373	-56.1523	-55.2368	-63.4766
-83.6182	-74.7681	-76.5991	-70.1904	-74.4629	-69.5801	-66.2231	-62.561	-61.9507	-62.8662	-55.2368	-57.9834	-61.0352	-58.2886	-53.7109	-56.4575	-66.5283
-83.313	-75.9888	-82.0923	-71.7163	-72.0215	-68.9697	-65.918	-60.4248	-64.6973	-61.6455	-55.542	-57.373	-60.4248	-57.373	-54.0161	-56.1523	-61.0352
-86.3648	-80.2612	-81.7871	-73.8525	-73.2422	-69.2749	-66.2231	-63.1714	-66.2231	-62.561	-57.6782	-57.6782	-59.8145	-54.9316	-54.3213	-54.0161	-60.1196
-86.0596	-75.9888	-78.125	-73.8525	-73.5474	-69.5801	-66.2231	-65.0024	-64.6973	-62.561	-57.6782	-58.2886	-58.8989	-56.4575	-53.7109	-52.4902	-62.8662
-83.6182	-78.125	-79.3457	-72.0215	-70.4956	-68.3594	-66.2231	-64.0869	-63.1714	-60.73	-55.8472	-57.9834	-58.5938	-58.2886	-53.1006	-51.5747	-60.73
-85.144	-80.2612	-81.7871	-71.7163	-71.7163	-68.9697	-64.3921	-63.7817	-63.1714	-57.373	-56.1523	-57.9834	-60.1196	-58.5938	-55.542	-53.7109	-60.1196
-86.0596	-78.125	-80.5664	-72.3267	-70.1904	-69.8852	-63.7817	-62.561	-60.4248	-61.0352	-54.3213	-57.373	-57.6782	-56.7627	-56.1523	-53.7109	-62.8662
-84.8389	-75.9888	-83.313	-75.6836	-69.2749	-69.8852	-65.3076	-61.9507	-61.6455	-59.8145	-53.1006	-57.0679	-56.7627	-57.0679	-54.3213	-52.1851	-61.6455
-84.5337	-80.2612	-83.313	-76.5991	-70.4956	-69.8852	-64.6973	-61.9507	-64.0869	-57.6782	-54.9316	-55.8472	-55.8472	-57.0679	-54.6265	-52.7954	-60.4248
-86.9751	-81.4819	-79.9561	-73.8525	-72.6318	-71.106	-65.918	-61.9507	-62.8662	-60.1196	-51.8799	-55.8472	-57.0679	-57.0679	-52.4902	-53.1006	-63.1714
-84.8389	-77.2095	-81.4819	-72.3267	-69.8852	-68.9697	-67.1387	-62.2559	-63.4766	-61.0352	-53.4058	-56.1523	-58.2886	-60.73	-52.1851	-54.6265	-60.4248
-87.2803	-78.7353	-83.0078	-73.5474	-69.2749	-68.0542	-65.6128	-61.0352	-62.8662	-60.4248	-56.1523	-56.1523	-60.73	-57.373	-54.6265	-55.542	-57.0679
-84.8389	-78.7353	-81.4819	-72.6318	-73.2422	-69.8852	-63.7817	-60.4248	-61.6455	-62.561	-55.542	-57.0679	-58.5938	-58.8989	-57.0679	-56.1523	-59.5093
-83.0078	-77.5147	-81.7871	-71.4111	-70.4956	-68.3594	-63.1714	-58.8989	-62.8662	-63.7817	-52.4902	-56.4575	-58.2886	-59.5093	-55.2368	-55.542	-57.6782
-83.0078	-79.6509	-84.5337	-75.9888	-69.2749	-67.4438	-64.3921	-59.5093	-63.4766	-59.2041	-55.2368	-55.542	-59.2041	-60.1196	-57.0679	-54.0161	-55.8472
-83.6182	-78.125	-81.1768	-71.7163	-72.6318	-66.8335	-64.0869	-58.5938	-62.561	-59.5093	-55.2368	-55.2368	-57.0679	-57.9834	-56.7627	-54.9316	-57.6782
-85.4492	-76.5991	-78.7353	-71.7163	-70.8008	-69.2749	-65.918	-58.2886	-61.0352	-63.4766	-56.1523	-57.0679	-56.4575	-56.1523	-54.6265	-52.7954	-58.5938
-84.5337	-79.3457	-80.8716	-75.0732	-69.5801	-69.8852	-66.5283	-59.8145	-59.5093	-60.73	-57.373	-55.542	-53.7109	-58.2886	-56.7627	-52.4902	-55.2368
-85.144	-80.8716	-81.1768	-75.0732	-72.3267	-72.0215	-65.3076	-60.1196	-60.1196	-62.561	-57.6782	-54.3213	-55.2368	-58.8989	-56.4575	-51.2695	-56.4575
-83.9233	-77.5147	-81.1768	-72.937	-72.3267	-72.6318	-67.1387	-61.6455	-64.3921	-62.8662	-57.0679	-54.3213	-55.2368	-57.0679	-55.2368	-50.9644	-58.8989
-81.4819	-78.4302	-82.0923	-72.937	-71.7163	-69.8852	-65.3076	-58.2886	-64.3921	-60.4248	-55.8472	-52.7954	-58.8989	-57.373	-54.9316	-50.6592	-58.5938
-83.0078	-80.5664	-80.8716	-75.6836	-74.7681	-69.8852	-65.0024	-57.373	-63.7817	-61.0352	-56.4575	-56.1523	-57.9834	-57.373	-58.5938	-50.354	-58.5938
-82.7026	-75.3784	-79.6509	-75.3784	-73.2422	-70.4956	-63.7817	-57.9834	-62.2559	-64.6973	-54.3213	-57.0679	-57.373	-58.2886	-56.1523	-51.2695	-61.3403
-79.6509	-76.2939	-81.4819	-74.4629	-71.7163	-65.918	-65.6128	-57.6782	-60.73	-61.6455	-57.0679	-56.4575	-58.5938	-57.9834	-57.0679	-51.5747	-57.0679
-81.7871	-78.125	-83.313	-72.937	-74.1577	-66.5283	-67.4438	-58.8989	-59.2041	-59.8145	-60.1196	-57.6782	-58.2886	-54.9316	-59.5093	-54.0161	-56.7627
-85.7544	-76.9043	-79.0405	-72.3267	-72.937	-65.918	-66.8335	-61.3403	-59.5093	-62.2559	-58.5938	-56.4575	-57.0679	-55.8472	-56.4575	-53.1006	-58.5938
-84.5337	-74.7681	-79.9561	-72.6318	-70.4956	-64.6973	-67.749	-58.5938	-61.3403	-62.2559	-58.2886	-56.1523	-54.6265	-58.2886	-56.4575	-52.7954	-56.7627
-85.4492	-79.0405	-83.0078	-72.3267	-72.937	-69.8852	-66.5283	-58.5938	-62.8662	-62.561	-57.9834	-56.4575	-53.7109	-56.7627	-56.7627	-53.1006	-57.9834
-86.6699	-77.5147	-80.5664	-73.2422	-71.7163	-70.8008	-65.918	-62.561	-63.4766	-63.1714	-55.542	-55.8472	-55.542	-58.2886	-55.8472	-54.9316	-59.5093
-84.2285	-72.937	-80.2612	-75.3784	-70.4956	-67.749	-67.4438	-60.73	-62.8662	-63.4766	-57.373	-55.8472	-57.0679	-57.6782	-57.0679	-55.2368	-57.373
-85.7544	-76.9043	-82.0923	-76.2939	-72.6318	-68.6646	-67.1387	-58.8989	-62.2559	-63.4766	-59.5093	-57.373	-57.0679	-57.0679	-58.2886	-53.4058	-56.4575
-86.3648	-77.8198	-79.9561	-73.8525	-74.7681	-72.0215	-66.8335	-59.8145	-60.73	-65.6128	-58.2886	-56.7627	-55.542	-56.4575	-56.7627	-53.7109	-61.0352
-85.4492	-77.8198	-80.5664	-72.6318	-71.4111	-68.0542	-67.749	-59.8145	-62.2559	-67.1387	-59.5093	-57.0679	-55.2368	-58.5938	-56.1523	-54.6265	-60.1196
-84.2285	-78.125	-82.3975	-74.1577	-72.3267	-67.749	-67.749	-61.6455	-62.8662	-65.3076	-60.4248	-57.373	-55.2368	-56.4575	-59.5093	-56.1523	-57.6782
-88.1958	-76.2939	-78.4302	-74.1577	-73.2422	-70.4956	-65.0024	-59.5093	-62.2559	-66.8335	-59.5093	-57.0679	-56.7627	-54.0161	-57.373	-57.9834	-58.8989
-86.0596	-74.7681	-78.7353	-73.2422	-70.4956	-69.5801	-67.749	-60.73	-63.4766	-67.4438	-58.2886	-57.0679	-56.4575	-56.4575	-57.6782	-59.5093	-57.6782
-86.9751	-75.6836	-82.3975	-73.8525	-70.8008	-67.1387	-67.749	-58.8989	-62.561	-64.6973	-59.5093	-56.7627	-55.2368	-54.0161	-59.2041	-58.8989	-56.1523
-90.0269	-77.8198	-82.7026	-72.3267	-73.5474	-71.4111	-67.4438	-61.3403	-62.8662	-63.1714	-59.8145	-59.2041	-57.6782	-56.4575	-59.2041	-55.8472	-58.8989
-87.2803	-74.7681	-80.8716	-73.2422	-71.4111	-69.5801	-68.0542	-63.1714	-62.2559	-65.0024	-58.5938	-58.2886	-55.2368	-56.4575	-57.6782	-57.9834	-60.1196
-86.6699	-75.9888	-82.3975	-75.9888	-71.7163	-69.5801	-68.0542	-59.5093	-63.7817	-62.561	-59.2041	-57.9834	-54.0161	-55.8472	-58.5938	-56.4575	-55.8472
-87.8906	-78.4302	-80.8716	-76.2939	-72.937	-71.7163	-66.8335	-59.2041	-63.1714	-60.4248	-59.5093	-55.8472	-55.542	-54.6265	-58.8989	-60.4248	-58.8989
-86.6699	-78.125	-77.5147	-75.6836	-71.4111	-72.0215	-65.6128	-59.8145	-61.3403	-63.4766	-58.5938	-56.7627	-54.0161	-56.7627	-57.6782	-58.8989	-61.0352
-83.9233	-78.4302	-81.1768	-74.7681	-69.8852	-71.4111	-66.8335	-62.8662	-60.73	-62.8662	-60.73	-56.4575	-53.7109	-57.9834	-57.9834	-58.5938	-57.9834
-86.9751	-78.4302	-82.3975	-72.6318	-73.2422	-73.8525	-66.8335	-61.3403	-59.8145	-62.8662	-61.3403	-55.542	-57.0679	-56.7627	-58.8989	-57.9834	-57.9834
-86.6699	-76.2939	-78.125	-74.1577	-72.937	-73.8525	-68.0542	-63.1714	-61.3403	-65.918	-58.8989	-58.2886	-56.4575	-59.2041	-59.5093	-56.7627	-59.2041
-84.8389	-76.2939	-80.8716	-73.2422	-70.8008	-71.7163	-67.749	-60.4248	-60.73	-64.3921	-61.6455	-55.542	-54.9316	-57.6782	-58.8989	-58.2886	-55.542
-88.8062	-78.4302	-79.9561	-71.4111	-70.4956	-74.4629	-64.6973	-61.0352	-61.3403	-64.0869	-62.2559	-55.2368	-57.373	-54.6265	-59.5093	-57.6782	-55.8472
-88.8062	-74.7681	-78.7353	-70.8008	-70.1904	-72.937	-64.0869	-64.0869	-62.561	-65.0024	-59.5093	-55.542	-54.9316	-57.9834	-58.8989	-59.8145	-60.1196
-88.8062	-74.1577	-77.8198	-70.1904	-66.8335	-69.5801	-64.0869	-63.4766	-62.2559	-64.3921	-60.1196	-55.542	-56.7627	-59.2041	-57.373	-59.2041	-57.6782
-87.8906	-75.9888	-78.7353	-70.8008	-70.8008	-72.6318	-63.7817	-63.7817	-61.9507	-63.1714	-62.561	-56.4575	-59.5093	-56.7627	-57.9834	-57.373	-57.373
-89.1113	-75.6836	-76.5991	-70.8008	-73.2422	-76.5991	-64.0869	-64.6973	-61.6455	-65.0024	-59.2041	-56.7627	-60.4248	-57.6782	-57.0679	-56.4575	-61.3403
-87.8906	-74.7681	-77.8198	-70.8008	-71.106	-74.1577	-66.5283	-65.0024	-60.4248	-65.6128	-59.5093	-57.373	-57.0679	-59.5093	-57.0679	-57.9834	-61.6455
-88.501	-75.6836	-79.3457	-71.106	-71.7163	-73.8525	-68.0542	-63.4766	-60.4248	-64.3921	-59.2041	-55.2368	-60.73	-57.373	-58.5938	-57.9834	-59.2041
-88.501	-75.9888	-75.6836	-73.5474	-69.5801	-75.6836	-65.0024	-65.0024	-61.6455	-65.918	-58.8989	-55.542	-61.0352	-55.542	-58.2886	-57.6782	-62.2559
-84.5337	-73.2422	-77.5147	-72.0215	-71.4111	-70.8008	-66.2231	-62.8662	-59.2041	-65.0024	-56.1523	-56.7627	-59.2041	-58.5938	-58.8989	-57.9834	-60.73
-86.3648	-74.1577	-77.2095	-73.8525	-72.3267	-71.106	-66.2231	-61.3403	-59.2041	-64.0869	-58.5938	-55.542	-60.4248	-57.0679	-57.6782	-56.1523	-58.5938
-87.8906	-75.3784	-75.0732	-74.7681	-73.2422	-73.5474	-64.6973	-65.0024	-59.2041	-65.918	-57.6782	-54.9316	-59.2041	-56.7627	-56.7627	-60.1196	-60.4248
-83.6182	-74.1577	-74.1577	-72.3267	-71.106	-72.3267	-66.5283	-65.3076	-59.2041	-67.1387	-55.2368	-55.2368	-58.2886	-57.0679	-53.7109	-57.6782	-60.73
-83.313	-73.2422	-77.8198	-68.9697	-72.0215	-72.6318	-66.5283	-62.561	-60.73	-63.1714	-59.2041	-54.9316	-56.4575	-56.1523	-58.2886	-55.542	-57.9834
-88.8062	-73.2422	-78.125	-69.8852	-72.0215	-73.5474	-66.5283	-61.9507	-60.73	-62.561	-57.0679	-53.7109	-59.5093	-53.7109	-59.2041	-54.6265	-59.8145
-88.1958	-72.937	-75.6836	-71.4111	-67.4438	-72.0215	-67.749	-64.6973	-59.8145	-64.0869	-56.1523	-56.1523	-60.1196	-55.2368	-57.373	-57.0679	-62.2559
-85.7544	-72.3267	-77.8198	-70.8008	-71.106	-72.0215	-66.8335	-64.3921	-60.1196	-64.0869	-57.6782	-54.3213	-58.5938	-55.542	-57.0679	-58.5938	-57.6782
-90.332	-73.8525	-73.8525	-72.937	-74.4629	-75.3784	-66.2231	-63.7817	-63.1714	-64.0869	-58.5938	-54.0161	-59.8145	-57.6782	-57.6782	-57.9834	-58.5938
-88.501	-72.3267	-71.4111	-71.106	-70.1904	-72.3267	-66.2231	-64.0869	-60.73	-65.3076	-56.7627	-54.3213	-58.8989	-58.2886	-58.2886	-56.7627	-61.6455
-87.2803	-75.0732	-75.3784	-69.2749	-70.4956	-68.6646	-66.5283	-63.1714	-59.2041	-64.6973	-59.5093	-53.4058	-59.5093	-55.542	-59.5093	-54.3213	-59.2041
-89.7217	-77.5147	-77.5147	-70.4956	-72.3267	-70.8008	-66.5283	-61.9507	-61.3403	-65.918	-61.3403	-54.3213	-58.8989	-56.7627	-61.6455	-56.4575	-59.2041
-92.4683	-75.0732	-73.8525	-72.3267	-71.7163	-70.8008	-66.5283	-62.561	-61.6455	-68.9697	-57.9834	-55.542	-58.5938	-56.7627	-58.2886	-57.0679	-60.4248
-88.1958	-74.7681	-73.2422	-72.3267	-71.106	-70.8008	-68.3594	-61.6455	-59.8145	-65.3076	-61.3403	-52.7954	-58.2886	-54.0161	-56.4575	-55.542	-59.2041
-89.1113	-76.9043	-75.9888	-73.8525	-73.5474	-72.3267	-67.1387	-63.4766	-55.542	-65.3076	-60.4248	-52.1851	-57.6782	-54.0161	-59.5093	-53.4058	-59.5093
-87.5854	-75.9888	-73.2422	-74.7681	-72.0215	-70.8008	-64.6973	-64.3921	-58.5938	-68.3594	-55.542	-54.9316	-61.3403	-55.8472	-56.7627	-54.3213	-61.0352
-83.313	-75.0732	-78.125	-72.937	-70.4956	-66.2231	-65.6128	-60.73	-61.9507	-68.0542	-57.6782	-52.4902	-59.5093	-56.7627	-55.542	-55.2368	-58.5938
-85.4492	-74.7681	-77.2095	-72.6318	-73.8525	-68.9697	-66.8335	-61.0352	-63.7817	-65.918	-61.6455	-52.1851	-59.8145	-55.8472	-57.9834	-54.9316	-57.9834
-88.1958	-74.1577	-74.1577	-73.2422	-72.3267	-69.2749	-67.1387	-64.6973	-64.6973	-69.5801	-58.8989	-52.4902	-59.2041	-56.4575	-56.4575	-55.8472	-60.4248
-87.8906	-73.2422	-75.3784	-72.937	-71.4111	-67.4438	-66.2231	-63.1714	-61.0352	-68.3594	-58.2886	-49.4385	-58.8989	-56.4575	-56.7627	-55.8472	-59.2041
-88.1958	-76.2939	-77.2095	-73.5474	-72.0215	-69.5801	-65.918	-61.0352	-63.1714	-65.3076	-59.8145	-49.7437	-57.9834	-55.2368	-60.1196	-54.9316	-59.2041
-90.332	-75.9888	-74.7681	-75.3784	-74.4629	-71.4111	-67.1387	-61.6455	-64.6973	-66.5283	-55.542	-52.4902	-57.373	-55.8472	-56.7627	-55.542	-60.73
-89.1113	-74.7681	-75.9888	-75.6836	-72.6318	-68.3594	-66.8335	-61.6455	-65.3076	-65.0024	-56.1523	-53.7109	-57.373	-55.542	-56.1523	-54.6265	-59.5093
-87.2803	-76.2939	-78.7353	-73.8525	-72.6318	-67.749	-67.1387	-59.5093	-66.2231	-64.3921	-60.4248	-52.4902	-58.5938	-56.7627	-58.5938	-55.542	-58.8989
-88.501	-78.4302	-75.0732	-73.2422	-72.937	-71.7163	-64.0869	-61.0352	-67.749	-66.5283	-59.5093	-54.0161	-59.2041	-55.8472	-57.0679	-57.0679	-62.561
-86.9751	-74.1577	-75.6836	-73.2422	-70.4956	-71.106	-66.5283	-64.3921	-66.2231	-67.1387	-57.373	-54.3213	-58.2886	-56.4575	-54.6265	-59.2041	-61.6455
-86.9751	-77.8198	-77.8198	-73.5474	-72.0215	-72.6318	-66.5283	-62.8662	-61.9507	-65.3076	-60.1196	-50.9644	-57.6782	-55.2368	-56.7627	-58.5938	-58.8989
-90.0269	-77.5147	-75.9888	-73.5474	-71.4111	-74.4629	-65.3076	-64.0869	-65.3076	-65.3076	-59.2041	-51.8799	-58.5938	-54.9316	-58.5938	-57.9834	-59.5093
-88.1958	-72.937	-75.0732	-72.6318	-68.9697	-70.1904	-67.749	-63.4766	-65.0024	-68.9697	-57.9834	-51.5747	-59.8145	-55.8472	-54.6265	-55.542	-61.0352
-90.0269	-75.6836	-77.2095	-73.2422	-69.2749	-69.2749	-67.1387	-59.5093	-67.1387	-66.2231	-61.3403	-48.8281	-57.9834	-54.9316	-57.6782	-54.6265	-60.4248
-91.8579	-76.9043	-76.5991	-73.8525	-71.4111	-71.7163	-67.749	-61.9507	-69.5801	-66.5283	-61.0352	-50.9644	-58.2886	-55.8472	-58.2886	-55.2368	-59.2041
-89.4165	-76.5991	-74.4629	-75.3784	-69.2749	-71.4111	-66.8335	-65.0024	-68.9697	-69.2749	-58.2886	-54.0161	-58.5938	-57.6782	-54.9316	-56.1523	-61.0352
-85.144	-74.4629	-78.4302	-74.7681	-70.8008	-69.2749	-68.0542	-63.7817	-69.2749	-65.6128	-59.5093	-53.1006	-56.7627	-57.373	-56.4575	-56.4575	-58.5938
-90.9424	-75.3784	-79.0405	-74.1577	-74.4629	-72.6318	-69.5801	-61.6455	-68.0542	-65.918	-61.3403	-51.2695	-57.0679	-56.7627	-60.4248	-56.4575	-59.2041
-90.9424	-72.937	-74.7681	-75.0732	-71.106	-70.8008	-69.8852	-65.0024	-66.5283	-66.5283	-61.0352	-53.1006	-58.2886	-56.4575	-58.2886	-57.6782	-63.4766
-86.0596	-73.8525	-75.3784	-75.0732	-72.6318	-68.3594	-66.8335	-62.2559	-65.918	-64.0869	-61.3403	-53.1006	-58.5938	-56.1523	-56.1523	-56.7627	-61.3403
-88.8062	-76.5991	-77.2095	-75.9888	-73.8525	-71.7163	-65.918	-61.0352	-67.4438	-63.1714	-63.4766	-54.9316	-57.6782	-55.542	-58.2886	-56.1523	-59.5093
-88.1958	-74.4629	-74.1577	-76.2939	-74.1577	-70.4956	-66.2231	-63.7817	-68.3594	-65.918	-58.5938	-57.373	-57.9834	-56.7627	-55.2368	-56.4575	-60.4248
-85.7544	-73.5474	-75.0732	-74.7681	-69.5801	-70.8008	-67.1387	-63.1714	-67.1387	-64.3921	-59.8145	-56.1523	-57.9834	-55.8472	-56.1523	-55.8472	-58.8989
-86.6699	-76.2939	-76.2939	-75.0732	-71.4111	-73.8525	-68.0542	-59.8145	-67.749	-63.4766	-61.6455	-52.4902	-58.8989	-55.2368	-57.373	-57.373	-56.4575
-88.8062	-73.5474	-72.937	-72.937	-71.4111	-74.4629	-67.4438	-61.9507	-65.918	-65.918	-59.5093	-53.1006	-59.2041	-54.6265	-54.6265	-59.2041	-59.5093
-85.144	-71.7163	-75.3784	-69.8852	-70.1904	-70.1904	-65.918	-60.73	-67.4438	-66.5283	-58.8989	-52.7954	-60.73	-53.4058	-55.8472	-58.8989	-60.1196
-86.9751	-72.937	-76.2939	-71.106	-73.8525	-71.4111	-64.6973	-59.2041	-67.1387	-66.2231	-60.73	-53.7109	-60.4248	-56.1523	-59.2041	-55.8472	-57.6782
-87.5854	-73.8525	-75.0732	-72.6318	-72.0215	-72.6318	-64.0869	-60.1196	-68.0542	-66.8335	-58.8989	-55.2368	-58.8989	-55.8472	-58.8989	-56.7627	-59.5093
-83.9233	-72.6318	-77.8198	-71.4111	-69.8852	-68.3594	-63.7817	-60.73	-65.3076	-67.4438	-61.0352	-53.7109	-58.5938	-55.2368	-57.9834	-58.5938	-58.2886
-85.144	-75.0732	-78.7353	-69.2749	-71.106	-68.6646	-62.561	-60.4248	-63.7817	-67.1387	-65.3076	-53.7109	-57.0679	-54.6265	-59.5093	-56.1523	-56.4575
-86.0596	-74.1577	-75.6836	-70.4956	-71.106	-70.1904	-63.4766	-65.6128	-65.6128	-68.3594	-61.9507	-54.9316	-58.5938	-57.373	-56.4575	-57.0679	-58.2886
-86.6699	-72.937	-75.0732	-71.4111	-66.8335	-69.8852	-67.1387	-65.6128	-61.3403	-68.9697	-58.8989	-54.0161	-60.73	-56.7627	-55.2368	-58.5938	-58.8989
-83.0078	-74.1577	-79.3457	-72.6318	-67.1387	-70.1904	-67.749	-62.561	-62.561	-65.6128	-60.4248	-53.7109	-59.2041	-56.7627	-58.5938	-57.6782	-59.2041
-83.6182	-73.8525	-76.5991	-75.9888	-68.3594	-72.0215	-67.1387	-63.4766	-63.4766	-65.918	-60.73	-54.6265	-57.373	-55.8472	-57.6782	-55.542	-59.5093
-84.2285	-72.0215	-75.0732	-75.3784	-66.5283	-68.3594	-65.3076	-66.8335	-65.0024	-67.4438	-61.9507	-55.8472	-57.0679	-54.9316	-53.7109	-56.4575	-60.4248
-82.7026	-72.0215	-78.7353	-72.3267	-68.0542	-68.0542	-65.918	-61.9507	-63.7817	-64.6973	-63.4766	-55.2368	-57.6782	-56.1523	-55.542	-57.0679	-58.5938
-84.2285	-74.1577	-77.8198	-74.1577	-70.1904	-71.7163	-67.749	-63.1714	-64.0869	-66.2231	-63.1714	-55.2368	-57.6782	-58.5938	-57.6782	-56.4575	-56.7627
-81.7871	-71.7163	-77.2095	-72.937	-68.0542	-68.3594	-67.749	-65.3076	-63.7817	-65.918	-58.2886	-55.2368	-55.542	-59.2041	-52.1851	-57.9834	-58.8989
-80.2612	-73.2422	-80.2612	-71.4111	-67.1387	-68.0542	-67.4438	-61.0352	-65.6128	-64.0869	-62.561	-51.8799	-55.8472	-56.4575	-54.0161	-56.7627	-58.2886
-84.5337	-75.6836	-79.9561	-72.3267	-69.5801	-69.2749	-66.5283	-62.8662	-64.3921	-64.0869	-62.8662	-52.4902	-56.4575	-57.6782	-54.6265	-57.0679	-57.0679
-84.8389	-74.4629	-77.5147	-75.0732	-67.1387	-69.2749	-66.2231	-65.6128	-62.2559	-66.5283	-58.2886	-54.3213	-55.542	-56.1523	-54.3213	-56.7627	-58.2886
-82.3975	-75.0732	-79.9561	-74.7681	-65.6128	-64.6973	-67.749	-62.8662	-60.1196	-64.0869	-60.1196	-52.7954	-55.8472	-54.3213	-57.373	-55.8472	-57.0679
-85.7544	-75.9888	-76.5991	-75.0732	-69.2749	-67.1387	-67.1387	-62.2559	-62.2559	-61.0352	-60.4248	-54.3213	-55.542	-53.7109	-57.6782	-54.0161	-57.9834
-85.4492	-75.9888	-74.4629	-74.1577	-68.3594	-69.5801	-67.1387	-65.3076	-64.3921	-64.3921	-58.2886	-56.1523	-54.0161	-55.542	-56.1523	-54.3213	-60.4248
-84.2285	-75.0732	-76.5991	-74.1577	-69.5801	-66.2231	-67.749	-63.7817	-61.3403	-63.7817	-59.5093	-53.1006	-55.2368	-56.7627	-57.373	-55.2368	-57.0679
-86.0596	-76.9043	-78.125	-75.0732	-71.106	-67.1387	-66.2231	-63.7817	-60.73	-64.6973	-63.4766	-50.6592	-57.6782	-54.9316	-58.5938	-53.7109	-57.373
-87.5854	-76.2939	-76.9043	-74.1577	-69.8852	-67.1387	-66.2231	-67.1387	-63.4766	-66.5283	-60.1196	-53.4058	-56.4575	-53.4058	-54.0161	-55.2368	-58.8989
-87.2803	-76.5991	-75.6836	-72.937	-67.4438	-64.0869	-66.8335	-65.6128	-60.73	-65.0024	-61.6455	-50.0488	-55.542	-55.542	-54.6265	-57.6782	-58.2886
-87.2803	-76.2939	-77.2095	-74.1577	-71.4111	-65.918	-67.749	-66.5283	-58.2886	-62.2559	-62.2559	-49.4385	-54.9316	-57.373	-56.7627	-56.7627	-57.0679
-86.9751	-77.2095	-73.2422	-75.0732	-70.8008	-68.6646	-69.8852	-67.1387	-59.5093	-64.3921	-57.9834	-53.4058	-58.5938	-56.7627	-54.3213	-54.0161	-61.3403
-83.0078	-77.8198	-74.7681	-72.6318	-70.4956	-66.5283	-69.2749	-65.6128	-58.8989	-65.6128	-57.9834	-54.3213	-59.5093	-56.1523	-53.7109	-56.4575	-61.3403
-83.9233	-75.9888	-76.9043	-71.4111	-73.8525	-67.1387	-67.1387	-64.6973	-57.6782	-61.9507	-60.73	-52.4902	-57.6782	-55.8472	-55.542	-54.6265	-59.8145
-88.1958	-76.2939	-75.3784	-72.0215	-70.4956	-68.9697	-65.6128	-67.1387	-60.73	-65.918	-58.8989	-52.7954	-56.1523	-55.542	-56.7627	-54.0161	-62.561
-83.9233	-75.0732	-77.2095	-73.2422	-68.9697	-66.2231	-66.5283	-68.9697	-62.2559	-63.7817	-57.9834	-53.4058	-57.373	-56.4575	-51.8799	-55.8472	-62.561
-82.0923	-74.7681	-77.8198	-72.3267	-69.5801	-66.2231	-67.749	-64.6973	-61.6455	-61.0352	-61.6455	-52.7954	-55.542	-54.0161	-56.1523	-55.2368	-58.8989
-86.0596	-76.9043	-77.8198	-72.3267	-69.8852	-67.4438	-70.1904	-65.6128	-62.8662	-62.2559	-59.8145	-52.4902	-52.7954	-55.8472	-55.8472	-55.542	-59.5093
-83.313	-77.8198	-75.0732	-72.0215	-68.3594	-67.749	-69.8852	-68.3594	-60.73	-63.4766	-57.6782	-52.7954	-55.542	-57.0679	-53.4058	-58.8989	-61.9507
-83.313	-76.9043	-79.6509	-72.6318	-68.9697	-66.5283	-69.5801	-65.6128	-57.9834	-62.2559	-58.5938	-50.6592	-56.4575	-54.3213	-55.542	-59.2041	-60.73
-84.2285	-79.3457	-77.5147	-74.1577	-72.0215	-69.8852	-71.106	-68.0542	-58.5938	-62.561	-60.1196	-52.1851	-55.2368	-53.7109	-57.0679	-58.2886	-60.4248
-82.0923	-79.0405	-75.9888	-73.5474	-65.0024	-67.1387	-70.8008	-70.4956	-60.73	-62.8662	-56.1523	-53.7109	-55.2368	-55.8472	-55.2368	-59.8145	-61.6455
-81.4819	-78.7353	-77.2095	-72.937	-68.9697	-65.918	-70.1904	-66.8335	-58.8989	-60.1196	-57.9834	-50.0488	-56.4575	-56.4575	-54.6265	-57.9834	-59.2041
-84.8389	-80.2612	-75.0732	-75.9888	-67.4438	-68.6646	-67.1387	-67.4438	-62.2559	-61.0352	-60.1196	-52.1851	-57.373	-55.2368	-55.542	-57.9834	-62.2559
-85.144	-80.2612	-73.5474	-75.3784	-65.0024	-68.6646	-66.2231	-70.1904	-63.4766	-63.1714	-57.373	-54.6265	-54.3213	-57.0679	-52.1851	-56.1523	-62.2559
-82.7026	-78.4302	-76.5991	-72.0215	-66.8335	-68.0542	-65.918	-67.4438	-59.5093	-63.1714	-57.6782	-52.4902	-54.9316	-57.6782	-55.8472	-55.8472	-61.0352
-85.4492	-79.0405	-78.7353	-73.2422	-68.9697	-67.749	-67.4438	-66.5283	-61.6455	-62.8662	-60.1196	-51.8799	-54.9316	-58.2886	-57.0679	-54.3213	-60.1196
-86.0596	-80.5664	-75.3784	-75.0732	-68.9697	-67.749	-68.3594	-67.749	-62.561	-66.2231	-56.7627	-54.6265	-56.1523	-54.9316	-55.542	-55.8472	-64.6973
-86.0596	-78.7353	-76.2939	-72.6318	-69.8852	-67.4438	-68.0542	-66.5283	-63.4766	-65.918	-57.373	-53.7109	-55.2368	-57.6782	-57.6782	-59.5093	-64.3921
-86.9751	-77.2095	-77.2095	-73.5474	-69.8852	-71.4111	-67.1387	-65.918	-60.1196	-60.4248	-59.5093	-53.4058	-54.0161	-56.4575	-58.2886	-57.0679	-63.1714
-86.0596	-76.2939	-75.6836	-73.2422	-69.2749	-71.7163	-67.1387	-66.8335	-62.8662	-59.8145	-57.373	-54.3213	-54.0161	-53.4058	-56.1523	-54.9316	-63.4766
-81.4819	-79.6509	-76.2939	-72.6318	-70.1904	-67.1387	-67.4438	-64.6973	-61.9507	-60.1196	-57.9834	-51.5747	-54.6265	-53.4058	-53.7109	-57.6782	-61.9507
-83.9233	-80.8716	-75.9888	-72.0215	-73.2422	-67.749	-67.4438	-64.0869	-61.6455	-60.4248	-59.8145	-50.9644	-55.542	-55.542	-58.8989	-55.8472	-60.4248
-86.6699	-79.0405	-73.5474	-74.4629	-70.4956	-67.4438	-68.9697	-69.2749	-61.0352	-63.1714	-58.5938	-51.5747	-55.542	-57.0679	-58.2886	-55.542	-60.1196
-82.7026	-79.6509	-74.7681	-72.6318	-71.4111	-68.6646	-68.6646	-67.4438	-57.373	-63.4766	-57.9834	-52.4902	-55.8472	-56.7627	-55.8472	-53.1006	-61.3403
-82.7026	-78.7353	-76.5991	-72.6318	-73.5474	-70.4956	-67.749	-64.0869	-60.1196	-62.8662	-59.8145	-51.2695	-53.1006	-57.9834	-58.2886	-54.0161	-58.5938
-85.7544	-77.8198	-72.3267	-74.1577	-70.4956	-70.4956	-68.0542	-66.8335	-65.0024	-65.6128	-60.73	-51.8799	-52.7954	-57.6782	-55.2368	-52.7954	-58.8989
-81.7871	-78.125	-72.0215	-71.4111	-68.0542	-67.4438	-66.2231	-68.6646	-64.3921	-65.918	-57.9834	-53.7109	-54.9316	-57.6782	-55.542	-53.4058	-59.8145
-79.9561	-80.8716	-75.6836	-71.106	-72.3267	-64.3921	-68.3594	-68.3594	-61.3403	-61.0352	-57.6782	-50.6592	-54.6265	-56.1523	-56.4575	-54.3213	-58.8989
-80.2612	-79.6509	-72.937	-71.4111	-72.0215	-68.3594	-68.0542	-69.8852	-64.0869	-61.9507	-57.0679	-53.4058	-54.6265	-55.8472	-57.373	-53.4058	-61.6455
-76.5991	-77.5147	-72.6318	-70.8008	-67.749	-65.918	-65.6128	-68.0542	-61.0352	-63.7817	-57.373	-52.7954	-55.542	-56.7627	-58.5938	-54.3213	-62.8662
-78.7353	-76.5991	-74.7681	-70.8008	-70.4956	-66.2231	-66.2231	-62.8662	-57.9834	-61.0352	-59.8145	-48.8281	-57.9834	-56.4575	-61.0352	-53.4058	-61.6455
-83.313	-77.5147	-72.6318	-73.5474	-72.6318	-67.749	-66.2231	-66.2231	-61.9507	-62.8662	-58.8989	-49.7437	-56.4575	-55.542	-61.3403	-54.3213	-61.0352
-82.7026	-78.125	-70.8008	-72.0215	-71.7163	-66.2231	-65.6128	-66.8335	-62.2559	-64.3921	-54.9316	-48.2178	-55.2368	-57.6782	-57.6782	-51.2695	-61.0352
-80.2612	-78.4302	-72.0215	-71.106	-73.2422	-66.5283	-66.5283	-64.0869	-60.73	-61.6455	-59.5093	-49.7437	-54.3213	-57.6782	-60.1196	-52.4902	-56.4575
-81.7871	-75.9888	-71.106	-71.106	-72.6318	-68.3594	-66.5283	-63.7817	-61.0352	-61.3403	-61.3403	-51.5747	-53.7109	-58.2886	-60.4248	-51.8799	-54.6265
-80.2612	-76.9043	-69.2749	-69.8852	-67.749	-66.5283	-66.2231	-65.918	-62.2559	-64.0869	-58.2886	-54.9316	-56.4575	-57.373	-58.8989	-53.1006	-59.2041
-77.5147	-77.5147	-73.8525	-70.4956	-70.8008	-64.3921	-68.9697	-65.0024	-60.73	-61.9507	-58.8989	-51.8799	-57.0679	-58.5938	-59.8145	-54.6265	-57.9834
-82.7026	-79.0405	-73.5474	-73.2422	-72.3267	-66.8335	-68.0542	-66.5283	-62.8662	-61.6455	-60.4248	-52.4902	-57.0679	-58.8989	-62.2559	-54.0161	-57.9834
-82.0923	-78.7353	-69.8852	-71.4111	-68.0542	-66.8335	-65.6128	-67.1387	-64.3921	-66.2231	-60.4248	-55.2368	-55.8472	-59.5093	-59.2041	-54.6265	-61.9507
-79.9561	-78.7353	-70.8008	-68.3594	-69.2749	-65.0024	-67.749	-62.8662	-62.2559	-63.4766	-61.6455	-51.5747	-56.4575	-59.2041	-57.6782	-52.1851	-60.1196
-83.0078	-80.5664	-71.4111	-70.1904	-72.0215	-68.6646	-67.749	-66.2231	-62.561	-61.3403	-63.4766	-55.8472	-56.1523	-57.9834	-59.5093	-50.9644	-58.5938
-83.0078	-81.1768	-68.9697	-73.5474	-71.106	-67.1387	-66.8335	-67.749	-63.4766	-62.8662	-61.3403	-57.6782	-55.8472	-57.9834	-55.542	-53.1006	-60.4248
-79.6509	-80.8716	-71.4111	-73.8525	-70.4956	-65.918	-65.3076	-66.2231	-63.1714	-61.9507	-59.5093	-56.1523	-57.373	-57.6782	-54.3213	-56.4575	-60.4248
-79.3457	-79.6509	-75.0732	-75.9888	-75.0732	-66.2231	-67.4438	-62.2559	-61.0352	-60.4248	-59.8145	-54.6265	-57.373	-58.5938	-58.2886	-54.9316	-56.4575
-80.2612	-78.4302	-70.4956	-73.5474	-72.6318	-68.0542	-64.6973	-67.749	-64.0869	-63.4766	-61.3403	-57.0679	-56.7627	-60.4248	-57.0679	-52.7954	-57.373
-79.3457	-79.6509	-72.6318	-73.5474	-72.3267	-66.5283	-63.7817	-65.6128	-62.2559	-61.6455	-60.4248	-53.4058	-57.0679	-58.5938	-56.1523	-52.7954	-59.2041
-81.4819	-79.9561	-71.7163	-72.6318	-73.8525	-69.2749	-63.7817	-63.4766	-62.8662	-59.2041	-60.1196	-51.8799	-56.7627	-57.6782	-58.5938	-52.4902	-53.1006
-82.7026	-80.2612	-66.8335	-74.7681	-71.7163	-70.4956	-63.4766	-66.8335	-66.5283	-63.7817	-62.2559	-54.6265	-55.542	-57.0679	-57.6782	-53.1006	-54.9316
-80.8716	-78.7353	-68.9697	-73.2422	-71.4111	-66.8335	-63.1714	-66.8335	-65.0024	-61.6455	-60.1196	-54.6265	-56.1523	-58.2886	-56.1523	-53.1006	-57.9834
-81.4819	-78.125	-69.2749	-73.8525	-72.937	-69.5801	-62.8662	-64.3921	-62.8662	-58.8989	-63.7817	-55.2368	-59.5093	-60.1196	-60.4248	-53.7109	-57.0679
-85.4492	-77.5147	-67.749	-76.2939	-71.4111	-69.5801	-64.3921	-65.918	-64.3921	-60.1196	-62.2559	-54.3213	-56.4575	-59.5093	-58.2886	-54.6265	-57.9834
-82.7026	-79.9561	-69.8852	-73.5474	-70.8008	-65.918	-65.918	-66.5283	-63.7817	-61.3403	-62.561	-52.7954	-56.1523	-57.373	-56.4575	-53.7109	-60.4248
-80.8716	-81.7871	-72.0215	-72.937	-72.6318	-66.2231	-65.6128	-64.0869	-63.4766	-59.2041	-62.561	-51.2695	-56.7627	-56.1523	-59.5093	-51.8799	-57.9834
-81.7871	-81.7871	-70.4956	-74.7681	-72.3267	-69.8852	-65.918	-66.5283	-65.0024	-61.9507	-62.8662	-54.3213	-54.6265	-57.373	-57.6782	-51.5747	-60.1196
-79.0405	-81.4819	-70.8008	-76.9043	-68.3594	-67.4438	-64.6973	-67.749	-64.6973	-62.561	-64.3921	-55.542	-53.1006	-59.8145	-56.7627	-51.8799	-61.3403
-78.4302	-79.6509	-71.4111	-79.0405	-69.8852	-65.918	-64.0869	-64.3921	-59.2041	-59.8145	-64.6973	-52.1851	-51.8799	-59.2041	-58.5938	-49.7437	-57.0679
-81.4819	-79.0405	-70.4956	-78.7353	-69.2749	-70.8008	-61.9507	-65.0024	-61.9507	-59.8145	-65.6128	-54.3213	-53.7109	-57.9834	-58.2886	-50.6592	-54.6265
-80.5664	-77.8198	-68.6646	-75.9888	-70.8008	-68.9697	-62.561	-66.2231	-63.1714	-59.8145	-64.0869	-53.1006	-54.3213	-57.9834	-56.4575	-53.1006	-58.8989
-82.3975	-81.7871	-71.106	-74.7681	-70.1904	-67.1387	-61.9507	-65.0024	-62.2559	-58.5938	-63.7817	-51.2695	-54.3213	-57.373	-56.4575	-54.6265	-59.8145
-81.7871	-80.5664	-70.8008	-78.7353	-72.3267	-68.0542	-63.1714	-67.749	-61.9507	-57.6782	-62.561	-52.7954	-51.8799	-58.2886	-55.8472	-54.6265	-58.5938
-80.8716	-82.0923	-69.5801	-77.2095	-68.3594	-69.5801	-62.2559	-68.9697	-61.3403	-59.8145	-61.9507	-54.6265	-51.8799	-57.0679	-53.1006	-53.1006	-57.9834
-77.2095	-82.7026	-71.7163	-77.5147	-69.8852	-67.4438	-63.4766	-65.0024	-59.5093	-57.9834	-61.6455	-55.8472	-52.4902	-56.7627	-54.3213	-53.1006	-56.4575
-80.8716	-79.3457	-71.4111	-79.9561	-72.3267	-69.8852	-64.6973	-65.3076	-62.561	-57.0679	-60.73	-54.3213	-51.5747	-54.6265	-57.6782	-52.4902	-54.0161
-80.2612	-80.8716	-69.2749	-79.3457	-68.0542	-72.3267	-63.4766	-67.4438	-64.3921	-59.2041	-61.0352	-57.0679	-51.5747	-57.0679	-55.8472	-55.2368	-58.8989
-79.6509	-81.1768	-70.8008	-76.9043	-71.106	-70.8008	-64.6973	-66.2231	-61.3403	-57.373	-60.1196	-55.542	-54.3213	-56.1523	-58.8989	-55.542	-60.4248
-81.4819	-77.5147	-71.4111	-77.5147	-70.8008	-71.7163	-63.7817	-65.918	-59.8145	-58.5938	-61.3403	-55.2368	-54.6265	-56.7627	-62.8662	-56.1523	-55.8472
-80.5664	-76.9043	-71.7163	-78.125	-70.8008	-70.4956	-63.7817	-68.3594	-61.6455	-60.73	-63.4766	-58.2886	-53.1006	-58.8989	-58.5938	-54.0161	-58.5938
-81.7871	-80.5664	-70.1904	-76.5991	-71.7163	-68.3594	-65.3076	-68.9697	-62.2559	-59.5093	-60.1196	-55.2368	-54.0161	-58.5938	-58.2886	-53.4058	-58.5938
-83.9233	-79.3457	-72.3267	-78.7353	-72.937	-67.749	-66.2231	-68.3594	-62.2559	-59.2041	-57.6782	-52.4902	-52.1851	-60.73	-59.8145	-57.0679	-58.5938
-83.313	-79.3457	-69.2749	-80.5664	-71.106	-68.3594	-64.6973	-71.4111	-62.561	-61.3403	-57.6782	-56.1523	-51.8799	-60.1196	-58.8989	-56.4575	-58.2886
-79.0405	-79.9561	-73.5474	-78.125	-69.2749	-66.5283	-63.4766	-70.4956	-60.4248	-60.73	-58.8989	-57.6782	-54.9316	-60.4248	-57.9834	-55.2368	-58.5938
-79.3457	-79.9561	-77.5147	-78.4302	-72.937	-68.0542	-66.8335	-65.918	-57.9834	-59.5093	-58.8989	-55.8472	-56.7627	-59.2041	-61.9507	-52.4902	-57.9834
-79.0405	-80.5664	-73.2422	-77.5147	-69.8852	-72.937	-67.4438	-66.5283	-62.8662	-61.6455	-61.9507	-58.8989	-53.7109	-58.2886	-62.561	-54.6265	-58.2886
-75.3784	-80.2612	-73.8525	-75.6836	-65.918	-68.6646	-65.3076	-66.2231	-63.4766	-60.1196	-61.3403	-57.373	-53.7109	-59.5093	-58.5938	-55.2368	-59.8145
-77.2095	-79.9561	-76.5991	-77.2095	-67.749	-69.8852	-64.0869	-65.0024	-62.8662	-58.2886	-62.561	-52.7954	-56.7627	-59.5093	-59.2041	-54.0161	-57.0679
-81.1768	-80.8716	-75.3784	-79.0405	-67.4438	-72.0215	-64.6973	-68.9697	-63.7817	-59.5093	-63.4766	-54.3213	-54.6265	-60.1196	-59.2041	-55.8472	-55.542
-79.9561	-80.2612	-73.5474	-79.0405	-66.8335	-68.6646	-64.0869	-67.4438	-62.2559	-62.8662	-61.3403	-58.8989	-54.6265	-60.1196	-57.6782	-55.8472	-56.7627
-78.125	-81.1768	-76.5991	-77.8198	-69.8852	-68.3594	-63.4766	-66.8335	-61.0352	-59.8145	-61.0352	-57.9834	-55.542	-61.3403	-57.0679	-56.1523	-54.0161
-78.7353	-81.1768	-75.6836	-79.3457	-68.6646	-71.4111	-63.7817	-67.749	-63.1714	-60.4248	-60.4248	-57.6782	-52.7954	-57.373	-57.6782	-56.4575	-56.1523
-76.2939	-82.3975	-71.4111	-78.4302	-67.4438	-69.5801	-62.8662	-68.6646	-65.0024	-62.8662	-60.4248	-58.8989	-54.0161	-57.6782	-56.1523	-56.4575	-59.5093
-75.0732	-83.0078	-74.4629	-75.6836	-68.9697	-66.8335	-62.8662	-65.3076	-62.2559	-60.1196	-59.5093	-54.3213	-56.4575	-58.5938	-57.9834	-57.373	-56.1523
-77.2095	-81.4819	-73.2422	-77.8198	-69.2749	-70.8008	-62.2559	-66.8335	-66.2231	-61.0352	-59.8145	-55.542	-55.542	-59.2041	-59.2041	-56.4575	-53.1006
-75.6836	-80.5664	-72.0215	-77.8198	-68.3594	-69.5801	-63.1714	-70.4956	-65.6128	-60.4248	-59.8145	-57.0679	-55.8472	-61.0352	-55.8472	-54.3213	-54.6265
-76.9043	-80.8716	-71.7163	-75.6836	-68.6646	-66.8335	-65.3076	-66.5283	-59.8145	-59.5093	-59.2041	-53.4058	-57.0679	-59.8145	-58.8989	-56.1523	-54.3213
-79.6509	-79.9561	-74.1577	-76.9043	-70.1904	-68.0542	-64.0869	-68.6646	-63.1714	-60.1196	-59.8145	-54.3213	-54.9316	-62.561	-60.1196	-60.1196	-54.0161
-82.3975	-79.6509	-72.3267	-75.0732	-67.4438	-70.1904	-63.7817	-68.6646	-65.0024	-61.9507	-58.2886	-57.0679	-55.8472	-62.2559	-57.6782	-58.8989	-57.6782
-81.1768	-78.4302	-75.0732	-72.6318	-68.0542	-68.0542	-63.4766	-69.8852	-62.561	-59.8145	-57.6782	-57.373	-57.9834	-61.3403	-59.5093	-57.9834	-55.2368
-80.8716	-76.9043	-76.2939	-78.125	-72.3267	-69.8852	-66.2231	-68.0542	-61.6455	-59.8145	-59.8145	-56.4575	-57.373	-59.5093	-62.2559	-57.373	-51.8799
-79.6509	-76.5991	-74.1577	-75.9888	-70.1904	-70.4956	-69.2749	-70.8008	-61.9507	-63.4766	-60.4248	-58.8989	-55.8472	-59.5093	-61.0352	-56.1523	-55.2368
-78.4302	-77.8198	-74.1577	-72.937	-68.0542	-67.1387	-68.3594	-68.9697	-59.2041	-61.3403	-61.0352	-56.4575	-57.373	-62.8662	-58.8989	-56.1523	-54.9316
-80.5664	-77.5147	-74.7681	-74.7681	-68.6646	-68.3594	-68.6646	-64.6973	-60.1196	-58.2886	-61.6455	-56.4575	-57.9834	-64.3921	-60.4248	-56.1523	-53.1006
-79.6509	-73.5474	-72.3267	-75.3784	-67.1387	-66.8335	-68.3594	-69.2749	-63.4766	-60.73	-59.5093	-57.6782	-57.0679	-65.0024	-60.73	-58.2886	-54.9316
-77.8198	-76.9043	-75.9888	-72.937	-65.3076	-67.749	-68.0542	-68.6646	-61.9507	-60.73	-60.1196	-55.2368	-56.7627	-63.4766	-59.5093	-57.0679	-55.542
-77.8198	-78.4302	-75.9888	-76.2939	-67.749	-70.1904	-67.4438	-67.749	-61.0352	-60.4248	-57.9834	-55.542	-57.9834	-64.0869	-59.2041	-56.4575	-54.0161
-80.5664	-77.8198	-73.2422	-77.2095	-68.0542	-68.9697	-68.3594	-68.0542	-65.0024	-62.561	-61.0352	-58.8989	-57.6782	-62.561	-55.8472	-56.7627	-55.2368
-80.2612	-77.2095	-70.4956	-74.7681	-67.1387	-67.749	-67.749	-65.918	-64.3921	-62.2559	-61.9507	-60.73	-56.7627	-62.2559	-55.542	-54.6265	-58.8989
-82.0923	-78.4302	-72.3267	-76.2939	-68.9697	-71.4111	-68.3594	-64.3921	-64.3921	-58.5938	-61.6455	-56.4575	-57.373	-61.0352	-58.5938	-53.7109	-55.542
-82.7026	-76.9043	-71.106	-77.8198	-65.0024	-73.8525	-66.5283	-67.749	-66.8335	-60.4248	-60.73	-57.0679	-55.8472	-60.1196	-58.2886	-55.2368	-54.3213
-78.7353	-76.5991	-70.8008	-74.7681	-65.3076	-69.8852	-67.4438	-67.1387	-63.4766	-60.1196	-59.8145	-58.5938	-57.9834	-59.8145	-58.5938	-54.3213	-57.0679
-79.6509	-76.5991	-72.3267	-76.5991	-68.6646	-69.8852	-68.9697	-63.1714	-60.1196	-60.1196	-57.6782	-60.1196	-60.4248	-60.4248	-60.4248	-52.7954	-54.6265
-79.0405	-75.9888	-71.7163	-78.7353	-67.749	-72.3267	-69.8852	-63.7817	-63.4766	-60.73	-59.2041	-60.1196	-59.5093	-60.73	-60.73	-53.4058	-51.8799
-81.1768	-75.6836	-71.106	-74.7681	-67.4438	-69.8852	-68.0542	-66.5283	-63.1714	-61.3403	-57.6782	-60.4248	-58.5938	-59.5093	-57.6782	-50.9644	-52.7954
-82.0923	-78.4302	-71.4111	-76.2939	-66.8335	-69.8852	-66.5283	-63.7817	-61.3403	-60.1196	-58.2886	-59.8145	-59.5093	-60.4248	-60.4248	-52.1851	-52.4902
-82.3975	-76.9043	-70.4956	-78.4302	-68.3594	-69.5801	-68.9697	-65.3076	-64.0869	-61.0352	-59.2041	-61.9507	-56.1523	-61.0352	-59.2041	-52.7954	-51.2695
-79.6509	-78.125	-71.4111	-75.0732	-67.749	-68.9697	-68.3594	-66.8335	-64.3921	-62.2559	-58.8989	-63.4766	-54.9316	-59.5093	-57.9834	-53.1006	-53.1006
-79.9561	-79.6509	-75.0732	-74.4629	-68.0542	-71.106	-69.2749	-65.918	-61.6455	-60.73	-57.9834	-60.73	-58.5938	-60.4248	-57.9834	-51.5747	-53.1006
-78.4302	-79.9561	-72.0215	-75.3784	-67.4438	-74.4629	-67.4438	-64.6973	-64.6973	-60.4248	-57.6782	-58.8989	-58.2886	-59.5093	-59.5093	-51.8799	-56.4575
-77.8198	-80.2612	-72.0215	-74.4629	-65.0024	-71.4111	-67.1387	-66.5283	-67.1387	-64.0869	-58.5938	-61.6455	-57.6782	-59.2041	-57.373	-53.1006	-56.1523
-77.5147	-79.9561	-72.3267	-73.8525	-65.918	-69.5801	-67.1387	-64.3921	-64.0869	-62.561	-57.6782	-61.6455	-59.2041	-59.5093	-58.2886	-52.4902	-54.9316
-76.9043	-75.6836	-73.2422	-76.5991	-68.6646	-72.3267	-65.6128	-63.7817	-65.6128	-61.6455	-57.6782	-57.6782	-59.5093	-60.73	-60.73	-56.4575	-54.6265
-79.6509	-73.8525	-73.8525	-76.2939	-66.2231	-69.8852	-66.2231	-66.5283	-68.0542	-63.4766	-56.4575	-59.2041	-56.1523	-60.73	-57.373	-56.7627	-55.2368
-81.1768	-78.7353	-73.5474	-74.4629	-65.0024	-68.6646	-68.9697	-66.2231	-65.3076	-64.0869	-56.1523	-58.2886	-56.7627	-59.5093	-58.8989	-55.542	-55.8472
-76.2939	-80.5664	-72.6318	-77.5147	-66.5283	-70.4956	-70.1904	-64.3921	-65.3076	-61.9507	-56.7627	-54.9316	-59.2041	-61.0352	-61.6455	-54.6265	-51.8799
-76.5991	-78.7353	-71.106	-76.2939	-66.8335	-70.1904	-68.6646	-64.6973	-65.3076	-63.7817	-60.1196	-57.9834	-58.5938	-58.2886	-58.5938	-55.542	-52.4902
-78.125	-80.8716	-74.1577	-75.3784	-68.0542	-65.6128	-68.9697	-63.7817	-61.3403	-61.9507	-59.2041	-60.4248	-61.0352	-57.0679	-56.7627	-54.0161	-54.9316
-78.7353	-79.3457	-76.2939	-76.5991	-69.2749	-67.4438	-67.1387	-63.7817	-61.0352	-60.1196	-58.2886	-56.7627	-60.4248	-57.373	-57.9834	-54.9316	-54.0161
-77.2095	-78.7353	-73.8525	-75.0732	-65.918	-68.9697	-64.0869	-65.6128	-64.0869	-59.8145	-58.5938	-57.9834	-56.7627	-57.373	-57.0679	-57.373	-55.542
-76.2939	-80.2612	-70.8008	-72.937	-68.0542	-68.3594	-65.918	-64.0869	-62.2559	-60.1196	-57.373	-57.373	-57.373	-57.6782	-57.373	-55.2368	-57.0679
-77.2095	-79.3457	-73.5474	-76.2939	-69.8852	-68.3594	-66.2231	-64.3921	-64.3921	-60.4248	-59.8145	-54.9316	-58.8989	-59.2041	-61.0352	-57.0679	-53.7109
-79.6509	-79.0405	-72.6318	-76.5991	-71.4111	-68.9697	-66.5283	-66.2231	-66.8335	-61.9507	-60.73	-57.6782	-57.6782	-58.2886	-58.8989	-58.2886	-52.1851
-79.0405	-81.4819	-73.2422	-72.0215	-71.7163	-65.6128	-68.0542	-64.3921	-64.6973	-62.2559	-60.1196	-60.4248	-57.0679	-57.0679	-58.2886	-57.0679	-54.3213
-78.7353	-81.7871	-72.0215	-75.0732	-71.4111	-66.5283	-68.3594	-63.1714	-62.2559	-61.6455	-58.5938	-57.373	-59.5093	-58.8989	-58.5938	-57.9834	-55.8472
-80.8716	-79.3457	-70.8008	-77.2095	-70.4956	-71.4111	-67.1387	-64.0869	-65.918	-64.3921	-57.0679	-56.7627	-58.2886	-56.7627	-57.9834	-59.2041	-54.0161
-82.3975	-79.9561	-72.0215	-74.7681	-68.3594	-71.4111	-67.4438	-65.0024	-63.7817	-64.6973	-57.0679	-59.2041	-58.2886	-54.9316	-56.4575	-58.8989	-55.8472
-82.3975	-80.5664	-75.6836	-75.3784	-68.9697	-69.5801	-70.1904	-61.0352	-61.3403	-63.4766	-56.7627	-59.2041	-59.5093	-55.8472	-59.8145	-55.2368	-56.1523
-79.9561	-77.8198	-75.9888	-78.7353	-70.8008	-69.8852	-71.106	-61.9507	-64.0869	-64.6973	-58.5938	-57.373	-58.2886	-54.9316	-59.5093	-57.6782	-55.2368
-79.0405	-78.4302	-74.4629	-75.0732	-71.4111	-70.1904	-67.749	-64.6973	-63.4766	-63.4766	-61.0352	-59.5093	-54.3213	-54.0161	-56.4575	-57.6782	-57.0679
-81.1768	-80.2612	-75.3784	-72.0215	-70.4956	-70.1904	-66.8335	-64.3921	-63.4766	-60.1196	-61.6455	-58.5938	-56.1523	-57.6782	-57.9834	-56.1523	-56.7627
-80.2612	-77.5147	-73.5474	-71.7163	-71.106	-70.8008	-66.8335	-64.6973	-64.6973	-59.8145	-60.1196	-59.2041	-55.542	-59.5093	-58.8989	-57.0679	-54.9316
-81.4819	-78.4302	-75.0732	-72.6318	-69.5801	-69.5801	-67.749	-65.3076	-65.918	-61.9507	-60.4248	-58.8989	-54.3213	-54.9316	-55.542	-57.9834	-56.4575
-81.1768	-81.1768	-75.9888	-73.5474	-70.4956	-68.9697	-67.4438	-65.0024	-61.6455	-62.561	-60.1196	-57.373	-58.2886	-55.542	-57.9834	-56.7627	-57.373
-79.6509	-80.2612	-76.9043	-73.8525	-69.2749	-72.937	-66.2231	-65.3076	-62.8662	-61.6455	-57.9834	-55.542	-59.8145	-57.373	-58.2886	-56.4575	-55.542
-78.4302	-79.0405	-75.6836	-72.937	-67.1387	-72.0215	-67.1387	-68.6646	-63.7817	-64.3921	-61.6455	-57.373	-57.9834	-54.6265	-57.373	-58.2886	-56.7627
-79.6509	-79.3457	-77.2095	-72.0215	-64.3921	-68.9697	-68.0542	-66.5283	-61.6455	-65.918	-61.3403	-57.6782	-58.5938	-56.1523	-55.2368	-55.542	-57.0679
-81.7871	-78.125	-77.5147	-72.937	-65.0024	-68.6646	-68.6646	-64.6973	-63.4766	-65.918	-62.2559	-56.4575	-59.8145	-58.2886	-57.9834	-57.0679	-54.6265
-81.7871	-78.4302	-75.9888	-72.937	-65.6128	-68.9697	-66.8335	-65.6128	-64.3921	-66.8335	-62.561	-56.1523	-57.9834	-56.1523	-55.2368	-57.6782	-56.1523
-83.9233	-82.3975	-79.3457	-70.8008	-64.0869	-67.4438	-64.6973	-64.6973	-62.8662	-66.2231	-61.3403	-57.9834	-59.2041	-54.6265	-56.1523	-56.7627	-57.6782
-81.4819	-79.9561	-76.2939	-73.5474	-64.3921	-70.1904	-66.5283	-64.3921	-63.4766	-63.1714	-59.5093	-54.9316	-60.4248	-55.542	-59.8145	-55.8472	-55.8472
-81.1768	-77.5147	-76.2939	-72.937	-65.3076	-70.4956	-66.5283	-65.0024	-66.5283	-62.2559	-59.2041	-55.2368	-59.2041	-55.2368	-55.2368	-57.0679	-56.7627
-80.5664	-80.2612	-77.2095	-70.1904	-64.6973	-67.749	-68.3594	-66.5283	-63.4766	-63.7817	-59.8145	-54.9316	-58.2886	-56.4575	-55.8472	-55.8472	-58.5938
-82.3975	-81.4819	-74.7681	-72.937	-66.5283	-69.8852	-68.6646	-64.3921	-61.3403	-63.1714	-58.5938	-54.3213	-60.73	-58.5938	-59.5093	-57.0679	-57.0679
-80.5664	-77.2095	-74.7681	-74.7681	-68.3594	-69.5801	-68.0542	-65.0024	-66.2231	-64.0869	-59.2041	-55.542	-57.6782	-56.7627	-59.8145	-60.4248	-56.7627
-80.8716	-78.125	-77.2095	-69.8852	-70.8008	-67.4438	-67.1387	-63.4766	-65.3076	-64.6973	-59.8145	-58.2886	-58.5938	-56.1523	-60.4248	-58.5938	-57.373
-81.4819	-78.7353	-78.125	-66.5283	-67.4438	-67.1387	-67.1387	-61.0352	-64.3921	-63.1714	-60.4248	-57.0679	-60.73	-58.2886	-62.8662	-57.9834	-56.4575
-78.4302	-76.2939	-78.125	-72.0215	-65.918	-68.6646	-67.1387	-64.6973	-63.4766	-63.4766	-60.73	-55.8472	-61.6455	-59.2041	-60.1196	-57.373	-53.7109
-166.931	-144.043	-102.844	-82.3975	-121.46	-96.4356	-77.8198	-98.5718	-139.771	-111.084	-98.2666	-115.051	-116.272	-128.174	-134.583	-115.356	-93.0786
-303.955	-252.686	-187.378	-186.462	-209.351	-176.392	-156.86	-179.749	-250.854	-204.773	-199.585	-194.397	-200.195	-235.291	-295.105	-247.803	-152.588
-307.007	-263.977	-235.901	-261.841	-218.201	-220.032	-225.22	-214.844	-249.023	-229.492	-210.266	-205.994	-209.656	-223.083	-278.625	-245.667	-179.443
-309.143	-280.457	-273.132	-289.917	-231.018	-248.718	-261.841	-236.206	-247.192	-242.92	-218.811	-214.844	-222.473	-215.149	-242.31	-219.421	-204.468
-355.225	-329.895	-325.012	-328.064	-274.048	-295.41	-302.734	-275.879	-276.184	-284.119	-260.01	-244.141	-254.822	-248.108	-259.399	-242.31	-242.92
-416.87	-385.132	-387.268	-383.606	-327.759	-354.614	-356.14	-337.83	-329.895	-341.492	-322.266	-292.664	-296.631	-293.884	-305.176	-291.443	-282.593
-488.586	-449.219	-451.965	-441.284	-384.827	-414.429	-412.903	-401.611	-386.658	-403.137	-378.113	-354.614	-347.595	-341.492	-357.361	-343.628	-335.388
-558.167	-519.104	-516.357	-497.742	-441.284	-470.886	-468.445	-451.355	-438.538	-457.459	-431.519	-402.222	-402.832	-390.625	-413.513	-389.099	-391.235
-606.384	-564.575	-569.763	-552.673	-492.554	-524.597	-519.409	-495.911	-485.535	-500.793	-477.905	-436.707	-448.303	-440.369	-459.29	-430.908	-427.551
-642.09	-604.248	-608.826	-596.924	-538.025	-564.27	-562.439	-537.109	-527.039	-539.856	-510.864	-472.107	-485.535	-477.905	-497.742	-466.919	-455.322
-678.101	-636.597	-646.362	-636.902	-574.646	-591.736	-596.313	-568.542	-559.082	-574.036	-543.518	-501.709	-519.104	-505.981	-530.396	-499.268	-486.45
-705.872	-659.79	-675.049	-671.692	-604.553	-619.507	-623.169	-600.281	-588.074	-598.755	-567.627	-518.494	-544.739	-527.649	-553.894	-524.292	-512.085
-728.76	-682.373	-690.918	-689.087	-629.578	-638.428	-642.7	-629.272	-606.384	-617.676	-586.548	-535.583	-559.082	-543.213	-571.594	-541.077	-536.194
-743.408	-702.515	-700.989	-696.106	-643.311	-653.992	-654.602	-646.057	-613.708	-629.272	-605.469	-556.946	-567.932	-562.134	-586.548	-555.725	-552.979
-755.005	-714.417	-710.754	-715.027	-652.466	-670.166	-663.452	-653.687	-623.779	-639.343	-617.065	-572.205	-581.055	-578.308	-603.638	-569.763	-561.829
-763.55	-722.656	-717.163	-724.487	-661.621	-679.932	-674.744	-660.095	-629.883	-642.395	-627.747	-581.665	-590.82	-584.412	-612.488	-579.529	-568.237
-771.79	-732.422	-726.624	-725.708	-672.302	-682.983	-682.678	-660.706	-633.24	-644.531	-632.019	-585.938	-592.651	-592.041	-621.033	-588.074	-573.73
-778.503	-738.22	-736.389	-733.643	-678.101	-686.035	-685.12	-664.368	-642.09	-647.583	-628.662	-589.6	-593.872	-599.976	-623.474	-593.567	-582.275
-779.114	-742.493	-743.408	-734.863	-672.913	-688.171	-688.782	-671.997	-651.855	-647.278	-624.695	-592.651	-598.755	-603.943	-623.169	-592.957	-585.938
-782.471	-746.765	-741.272	-726.929	-676.88	-688.782	-689.087	-678.101	-653.076	-645.752	-627.136	-594.177	-605.469	-602.417	-621.643	-593.262	-592.041
-782.166	-747.07	-736.389	-726.013	-677.49	-690.613	-690.613	-676.88	-654.297	-640.564	-625.61	-587.463	-611.572	-602.417	-620.728	-594.177	-592.957
-771.484	-745.239	-733.948	-732.117	-681.458	-693.97	-689.697	-672.607	-659.485	-639.954	-623.474	-589.294	-615.54	-596.313	-617.981	-594.177	-592.957
-766.296	-750.122	-733.032	-735.474	-687.866	-691.833	-689.392	-667.419	-656.128	-641.479	-623.779	-596.619	-616.15	-586.853	-615.845	-591.125	-592.651
-765.991	-752.563	-731.201	-731.812	-685.73	-687.561	-685.12	-666.809	-652.771	-643.616	-627.136	-593.872	-614.014	-580.139	-617.676	-585.632	-590.21
-766.907	-742.493	-728.455	-729.675	-681.458	-685.425	-679.626	-668.945	-652.161	-643.616	-631.714	-590.515	-611.267	-580.75	-612.488	-588.379	-583.801
-765.991	-737.305	-726.624	-724.792	-675.659	-675.049	-671.997	-663.452	-645.142	-645.142	-628.357	-589.905	-599.976	-580.75	-605.469	-588.989	-573.12
-763.855	-729.065	-726.318	-726.624	-672.607	-668.945	-672.302	-650.33	-633.24	-640.869	-621.338	-583.496	-593.567	-580.139	-603.943	-583.191	-565.186
-759.583	-719.604	-730.591	-725.403	-671.997	-671.082	-674.133	-640.259	-633.545	-641.785	-618.286	-578.308	-591.736	-574.341	-600.281	-579.529	-561.829
-760.193	-715.942	-734.558	-716.248	-674.133	-668.945	-672.607	-635.986	-633.85	-639.038	-622.253	-580.444	-590.515	-565.186	-594.482	-580.139	-561.523
-757.446	-724.487	-737.915	-711.67	-676.27	-671.082	-669.861	-635.986	-630.493	-638.733	-620.117	-571.899	-591.736	-563.354	-586.243	-578.003	-560.608
-745.239	-728.455	-739.746	-711.67	-670.471	-669.861	-663.757	-633.85	-629.272	-638.428	-618.286	-565.796	-589.6	-557.251	-575.867	-576.477	-557.556
-738.22	-725.098	-743.408	-708.923	-665.588	-665.894	-663.147	-631.104	-620.117	-634.155	-617.676	-568.542	-587.463	-549.622	-570.374	-570.679	-554.81
-740.662	-722.656	-744.019	-704.651	-659.18	-658.569	-662.231	-621.338	-613.708	-630.798	-612.793	-571.594	-585.632	-543.213	-568.542	-567.627	-555.115
-745.85	-714.722	-744.324	-706.482	-654.907	-658.569	-660.4	-619.202	-615.54	-627.747	-614.624	-570.679	-583.801	-538.94	-563.965	-569.153	-549.011
-747.681	-714.111	-737.61	-703.735	-656.433	-659.18	-654.907	-621.033	-611.267	-618.591	-616.15	-574.036	-576.782	-533.447	-560.608	-567.627	-544.128
-750.427	-717.773	-728.76	-703.125	-653.687	-651.55	-652.466	-616.15	-603.333	-611.267	-614.929	-573.73	-570.984	-534.973	-558.167	-566.101	-545.959
-748.901	-717.773	-719.299	-708.313	-649.414	-649.719	-646.667	-615.845	-599.06	-603.943	-606.995	-569.458	-566.711	-535.278	-558.472	-563.66	-544.128
-747.375	-709.229	-715.942	-706.787	-646.973	-652.466	-641.785	-616.76	-599.67	-602.722	-603.333	-568.542	-558.167	-528.87	-550.232	-564.88	-542.297
-740.967	-701.599	-710.449	-697.937	-647.583	-657.349	-645.142	-613.708	-597.839	-599.67	-601.501	-567.322	-560.608	-526.123	-545.349	-561.523	-542.908
-735.474	-699.463	-704.956	-693.665	-642.395	-659.18	-644.836	-614.624	-605.774	-596.008	-592.957	-557.251	-561.523	-523.071	-547.791	-553.284	-543.518
-732.727	-694.58	-701.599	-688.477	-639.038	-654.602	-641.174	-615.845	-605.774	-590.82	-589.905	-548.096	-558.777	-520.63	-544.128	-547.18	-541.077
-731.201	-698.853	-702.515	-685.425	-632.019	-647.888	-639.954	-610.962	-604.553	-585.022	-588.989	-543.518	-553.284	-520.325	-542.603	-548.401	-541.992
-730.896	-698.242	-700.073	-685.425	-627.747	-646.057	-637.207	-603.638	-604.553	-580.139	-590.21	-535.583	-552.979	-522.766	-544.434	-545.959	-539.246
-728.149	-694.275	-695.19	-681.763	-628.357	-643.616	-628.357	-604.248	-603.638	-575.256	-587.463	-533.752	-552.063	-520.63	-537.109	-546.57	-540.161
-726.013	-697.632	-692.444	-676.575	-628.662	-634.766	-625.305	-604.248	-600.281	-572.815	-586.243	-534.058	-543.823	-520.02	-535.278	-541.687	-540.771
-727.539	-696.411	-689.697	-675.049	-624.695	-630.493	-621.948	-601.501	-589.294	-571.289	-582.275	-527.344	-537.415	-522.156	-538.94	-531.311	-540.466
-727.539	-694.58	-686.951	-675.964	-621.338	-627.747	-616.76	-598.145	-586.243	-564.88	-577.698	-526.123	-533.447	-513.611	-531.921	-529.48	-543.823
-722.046	-694.885	-682.068	-671.997	-620.422	-622.253	-614.319	-599.06	-579.224	-556.946	-573.425	-527.954	-528.564	-507.507	-521.24	-527.954	-541.077
-716.553	-695.801	-679.932	-667.114	-614.319	-616.15	-612.488	-596.924	-575.256	-554.504	-569.153	-524.292	-524.597	-507.202	-520.02	-532.227	-537.109
-712.891	-686.646	-682.373	-664.978	-611.877	-610.962	-609.741	-596.619	-572.205	-554.81	-565.796	-520.02	-522.461	-502.625	-518.799	-533.752	-532.532
-714.722	-681.152	-683.594	-663.147	-613.403	-606.384	-609.131	-593.262	-563.049	-551.453	-564.88	-520.935	-518.799	-499.878	-517.578	-535.889	-531.311
-716.858	-680.542	-680.237	-660.4	-617.065	-602.722	-608.215	-585.327	-557.556	-552.063	-565.796	-520.325	-520.935	-498.657	-520.02	-532.532	-533.142
-711.67	-677.49	-676.88	-659.485	-620.422	-607.3	-603.027	-586.853	-563.049	-555.115	-565.186	-521.851	-523.682	-494.385	-521.851	-528.259	-532.837
-708.313	-675.354	-675.354	-653.076	-621.033	-608.826	-603.333	-583.801	-566.711	-550.842	-563.354	-523.376	-522.461	-491.943	-518.494	-525.208	-528.259
-707.703	-677.49	-675.354	-645.142	-619.507	-608.521	-600.586	-575.256	-565.186	-546.57	-565.491	-520.935	-522.766	-495.3	-516.968	-514.221	-521.851
-706.787	-680.847	-676.575	-640.259	-621.338	-607.3	-597.534	-574.036	-564.27	-546.57	-566.101	-519.409	-519.714	-494.69	-516.968	-508.728	-520.325
-704.956	-679.932	-676.27	-636.292	-621.643	-606.079	-594.177	-569.153	-561.218	-548.706	-564.575	-520.325	-510.254	-487.976	-513.611	-512.39	-519.104
-703.43	-677.795	-672.913	-636.292	-618.896	-600.281	-593.262	-563.049	-554.81	-552.063	-564.27	-520.02	-506.287	-486.45	-513.611	-508.423	-519.714
-699.463	-672.607	-669.556	-640.564	-615.54	-603.638	-592.651	-558.167	-552.673	-549.622	-564.575	-516.357	-506.287	-489.807	-513.611	-499.573	-523.071
-692.139	-668.945	-664.368	-638.123	-614.319	-607.91	-588.989	-558.167	-552.063	-547.18	-559.082	-517.883	-504.456	-487.976	-509.033	-494.69	-520.02
-688.477	-667.419	-660.4	-629.272	-609.436	-603.027	-589.294	-550.537	-547.485	-543.823	-552.368	-513	-499.573	-486.145	-510.864	-487.671	-515.137
-687.866	-662.537	-659.485	-624.39	-603.027	-603.943	-590.515	-546.265	-540.466	-544.434	-549.011	-508.423	-497.131	-487.061	-511.78	-481.873	-511.169
-689.087	-657.654	-665.283	-623.169	-605.469	-604.553	-583.496	-543.213	-536.499	-544.434	-548.401	-514.221	-494.69	-477.6	-505.676	-480.957	-508.118
-689.697	-655.518	-667.419	-617.065	-607.605	-606.995	-576.172	-534.058	-528.259	-540.161	-550.842	-519.714	-489.502	-475.159	-498.352	-479.126	-502.014
-682.983	-653.687	-660.095	-611.572	-603.333	-608.215	-565.796	-532.532	-524.292	-532.227	-546.875	-514.526	-481.567	-478.516	-496.826	-474.854	-502.014
-678.711	-649.414	-650.635	-609.436	-597.839	-610.352	-557.556	-533.447	-528.259	-525.513	-544.128	-510.559	-473.938	-472.412	-494.69	-473.938	-501.404
-673.828	-649.414	-647.278	-603.943	-591.736	-602.722	-554.199	-532.227	-524.902	-521.545	-543.823	-507.812	-470.581	-464.478	-491.943	-467.224	-498.657
-671.082	-653.076	-645.752	-598.145	-581.055	-596.313	-552.063	-525.818	-521.851	-518.799	-542.603	-503.54	-469.666	-463.867	-490.723	-460.815	-493.469
-669.556	-650.94	-643.921	-598.45	-573.12	-596.008	-544.128	-519.104	-523.682	-511.169	-539.246	-501.404	-466.003	-462.952	-486.45	-463.562	-489.807
-669.25	-650.94	-642.7	-591.431	-569.458	-594.788	-539.856	-513.611	-521.851	-507.507	-538.94	-499.573	-459.595	-464.783	-481.262	-469.055	-484.924
-667.419	-651.245	-640.564	-586.548	-567.017	-594.788	-536.194	-511.78	-516.357	-504.761	-536.804	-490.723	-460.205	-470.276	-474.548	-468.445	-483.093
-666.199	-646.667	-639.954	-586.243	-563.354	-596.313	-536.499	-512.39	-512.695	-499.573	-535.583	-484.619	-460.205	-468.14	-466.309	-467.834	-483.398
-670.776	-644.226	-633.85	-578.613	-564.88	-591.125	-538.025	-509.644	-513	-497.437	-539.551	-481.262	-456.238	-459.9	-462.341	-466.614	-477.6
-677.795	-643.005	-626.831	-574.646	-565.491	-585.632	-540.161	-503.54	-507.507	-499.573	-536.499	-474.243	-451.965	-461.121	-464.783	-463.257	-472.107
-680.847	-639.954	-623.474	-573.425	-570.068	-583.191	-538.33	-502.93	-499.878	-496.521	-529.785	-471.802	-450.745	-463.867	-460.815	-463.562	-472.412
-679.626	-636.292	-622.559	-572.51	-572.815	-580.75	-534.668	-499.573	-490.723	-491.943	-527.039	-473.022	-445.557	-463.562	-453.491	-458.374	-471.191
-677.185	-632.935	-621.948	-573.73	-564.575	-574.341	-527.954	-493.164	-483.093	-489.197	-521.24	-472.107	-443.42	-465.393	-455.627	-449.219	-469.971
-671.082	-627.747	-622.864	-580.75	-565.186	-572.205	-522.461	-497.437	-484.314	-489.502	-518.494	-472.107	-447.693	-466.003	-454.407	-443.726	-469.971
-669.25	-627.441	-621.643	-579.834	-568.542	-567.322	-523.987	-502.319	-482.483	-489.807	-520.325	-475.464	-452.271	-466.003	-446.472	-444.641	-468.14
-667.725	-625.61	-618.896	-582.275	-566.406	-563.354	-524.902	-497.437	-476.99	-494.995	-517.578	-471.497	-459.595	-469.36	-440.369	-437.927	-457.459
-669.25	-620.117	-615.845	-584.717	-562.439	-563.965	-523.071	-495.605	-473.022	-496.826	-513	-471.191	-466.003	-467.224	-438.232	-433.044	-451.66
-665.588	-615.234	-614.929	-580.139	-564.27	-564.575	-520.02	-497.742	-472.717	-493.469	-508.423	-473.938	-465.393	-456.543	-430.603	-430.298	-456.848
-659.18	-612.793	-610.352	-573.425	-563.965	-562.134	-515.137	-500.488	-468.75	-489.197	-502.625	-472.412	-458.374	-451.66	-425.415	-428.467	-456.543
-655.518	-611.572	-607.3	-570.679	-559.692	-567.627	-513	-501.099	-468.75	-488.892	-495.605	-469.971	-460.51	-448.608	-428.467	-422.668	-454.407
-651.855	-604.858	-607.91	-567.627	-560.303	-570.068	-502.625	-501.099	-466.919	-485.84	-493.774	-470.276	-462.036	-444.031	-427.246	-414.734	-454.407
-651.245	-603.638	-608.215	-563.049	-559.692	-568.237	-491.638	-497.131	-463.257	-481.567	-498.657	-466.919	-457.764	-440.674	-428.772	-408.325	-450.745
-648.193	-604.858	-604.858	-563.049	-560.913	-570.679	-489.502	-495.3	-461.426	-481.873	-505.371	-461.426	-460.205	-442.505	-431.824	-399.78	-448.914
-644.226	-602.417	-601.807	-560.303	-561.523	-570.679	-488.586	-494.08	-459.595	-479.126	-510.254	-461.426	-455.933	-440.674	-430.603	-397.339	-447.693
-647.888	-607.3	-601.501	-556.03	-563.965	-561.523	-485.535	-490.723	-455.322	-473.328	-516.663	-460.815	-444.641	-438.843	-429.382	-394.592	-444.336
-655.212	-606.384	-603.027	-553.284	-561.218	-554.199	-479.126	-490.417	-457.459	-469.971	-511.169	-456.848	-437.012	-443.42	-429.688	-390.93	-443.726
-654.907	-603.027	-600.281	-550.537	-560.913	-550.537	-478.21	-492.249	-463.562	-466.309	-504.15	-458.679	-434.875	-439.758	-431.519	-390.32	-442.2
-651.855	-596.924	-599.976	-544.739	-560.913	-547.18	-480.347	-487.671	-465.088	-466.309	-501.404	-459.29	-431.519	-435.181	-433.96	-387.573	-437.927
-649.719	-595.703	-597.229	-549.316	-556.946	-541.382	-475.769	-482.788	-464.783	-468.75	-502.625	-456.848	-428.162	-428.467	-433.044	-380.554	-437.012
-648.804	-590.21	-596.924	-551.758	-557.251	-543.518	-472.717	-480.957	-464.783	-468.75	-502.319	-455.627	-426.636	-424.805	-426.331	-377.808	-436.401
-650.024	-588.989	-594.788	-551.453	-556.946	-543.518	-475.769	-476.685	-460.205	-469.666	-503.235	-458.069	-424.5	-424.194	-420.227	-379.944	-433.044
-649.414	-586.548	-586.548	-556.335	-554.504	-539.551	-475.769	-471.802	-454.407	-473.633	-507.202	-461.121	-424.805	-427.551	-426.025	-379.334	-433.35
-647.278	-579.529	-581.665	-559.692	-551.147	-540.771	-473.633	-472.107	-451.965	-470.276	-504.761	-463.562	-427.246	-429.382	-436.401	-380.249	-440.063
-643.005	-574.951	-582.886	-556.641	-551.147	-538.94	-473.633	-476.379	-446.472	-467.224	-498.962	-466.614	-429.993	-428.162	-436.096	-382.996	-438.843
-638.123	-576.782	-579.224	-556.03	-548.401	-536.499	-470.581	-475.464	-443.115	-471.191	-489.807	-465.698	-434.57	-431.824	-430.908	-378.723	-440.063
-636.292	-576.172	-573.12	-556.03	-546.265	-532.532	-463.867	-471.497	-442.81	-474.854	-487.976	-464.172	-432.739	-429.382	-429.382	-375.366	-445.251
-636.597	-570.679	-568.848	-556.335	-544.739	-527.954	-454.102	-473.022	-439.758	-474.854	-493.164	-460.51	-424.194	-419.006	-425.11	-375.061	-444.336
-636.597	-564.575	-561.829	-553.894	-539.856	-518.799	-447.388	-475.159	-435.181	-474.548	-492.859	-458.069	-419.312	-416.87	-426.331	-374.146	-442.505
-631.409	-552.063	-556.335	-550.232	-539.856	-520.63	-447.693	-475.769	-429.382	-470.886	-487.366	-457.459	-420.532	-418.091	-430.603	-369.873	-442.81
-621.643	-547.18	-556.03	-550.232	-539.551	-519.409	-450.134	-475.464	-427.551	-469.36	-487.061	-457.459	-417.48	-415.649	-428.162	-366.821	-441.589
-617.065	-548.706	-552.979	-556.03	-536.804	-515.137	-451.05	-472.412	-421.143	-466.919	-491.028	-454.102	-415.344	-415.955	-426.331	-362.854	-438.232
-613.708	-544.739	-551.758	-566.406	-535.278	-514.526	-447.083	-466.309	-419.922	-463.562	-493.774	-446.167	-420.837	-413.513	-429.077	-359.497	-438.232
-610.657	-540.466	-550.842	-568.542	-531.921	-515.442	-444.946	-466.309	-420.227	-454.102	-497.742	-445.557	-422.363	-407.104	-427.551	-361.328	-439.453
-609.436	-538.635	-544.739	-565.186	-521.851	-515.137	-443.42	-467.834	-418.091	-453.491	-499.268	-442.2	-418.091	-405.884	-427.551	-361.328	-437.622
-610.046	-538.94	-543.213	-564.88	-516.052	-516.968	-442.2	-468.445	-421.448	-451.66	-495.911	-438.843	-415.039	-411.987	-431.213	-357.056	-435.181
-612.488	-532.227	-544.128	-565.796	-520.325	-519.104	-442.2	-473.022	-421.753	-443.42	-496.216	-441.589	-414.734	-413.513	-438.843	-358.276	-431.519
-612.488	-530.701	-542.603	-563.049	-520.325	-517.883	-446.777	-469.971	-419.617	-439.758	-497.437	-437.012	-413.818	-410.156	-443.115	-357.056	-428.162
-614.014	-527.954	-541.992	-566.101	-516.968	-516.968	-449.829	-470.886	-420.532	-437.317	-495.605	-428.162	-414.429	-411.682	-446.472	-354.004	-423.889
[truncated: 3,325 more rows]

## Sheet: A_Icilin
External solution, 25 uM Icilin, 0 uM PregS
[truncated: 4,002 more rows]

[truncated: 1 more sheets: A__Icilin-PregS]
