# Supplementary material for: Conservation of the cooling agent binding pocket within the TRPM subfamily
Source: eLife. 2024 Nov 1;13:RP99643. doi: 10.7554/eLife.99643 (PMC11530238; doi:10.7554/eLife.99643)
Supplement: Figure 4—figure supplement 1—source data 2. [file elife-99643-fig4-figsupp1-data2.xlsx]

## Sheet: B_Avg&SD
0 uM Icilin							25 uM Icilin
	External			40 uM PregS			25 uM icilin			25 uM icilin + 40 uM PregS
Voltage	Ave	SD	N	Ave	SD	N	Ave	SD	N	Ave	SD	N
-160	-0.01878	0.011455	3	-0.332613	0.222312	3	-0.02736	0.0191443	3	-0.400057	0.243061	3
-140	-0.003473	0.0264763	3	-0.282927	0.189235	3	-0.0249467	0.0160473	3	-0.35181	0.195526	3
-120	-0.005028	0.0191625	3	-0.253597	0.166131	3	-0.0281533	0.0243447	3	-0.30885	0.172224	3
-100	-0.00219633	0.0177375	3	-0.198437	0.148186	3	-0.02302	0.018734	3	-0.250243	0.14103	3
-80	-0.00327533	0.011357	3	-0.14584	0.109282	3	-0.02119	0.0204221	3	-0.19708	0.107441	3
-60	-0.00230533	0.0104289	3	-0.105043	0.085168	3	-0.0160967	0.0151329	3	-0.1523	0.093766	3
-40	-0.001627	0.00768333	3	-0.0668667	0.0529885	3	-0.0132867	0.0123352	3	-0.0939633	0.0600381	3
-20	-0.00167633	0.00612502	3	-0.03431	0.0276438	3	-0.00697333	0.00520471	3	-0.0421267	0.0251203	3
0	0.00250933	0.00445423	3	-0.00115967	0.00480514	3	-0.000182667	0.00362256	3	0.00812867	0.00480939	3
20	0.003259	0.00428995	3	0.0543943	0.028711	3	0.00874833	0.00565707	3	0.072725	0.030562	3
40	0.00418367	0.0110563	3	0.147442	0.0545724	3	0.018218	0.00820793	3	0.197611	0.0585195	3
60	0.0177843	0.0130179	3	0.25517	0.0883375	3	0.0374987	0.0172387	3	0.349696	0.0869465	3
80	0.0145703	0.0441832	3	0.404824	0.132401	3	0.055687	0.0264451	3	0.507065	0.127675	3
100	0.0230567	0.0688692	3	0.53156	0.13072	3	0.0814183	0.0495471	3	0.700053	0.182103	3
120	0.0329347	0.101194	3	0.696528	0.117123	3	0.101631	0.065819	3	0.872033	0.258062	3
140	0.0446517	0.134221	3	0.867235	0.104223	3	0.145252	0.0909138	3	1.128	0.293596	3
160	0.110653	0.118683	3	1	0	3	0.183416	0.1268	3	1.30425	0.39587	3

## Sheet: B_Control
0 uM Icilin
V (mV)	External			PregS (+ 40 μM)
-160	-0.00955	-0.01519	-0.0316	-0.47287	-0.07629	-0.44868
-140	-0.00942	0.025471	-0.02647	-0.4311	-0.06976	-0.34792
-120	-0.00774	0.015346	-0.02269	-0.40959	-0.07891	-0.27229
-100	-0.0074	0.017561	-0.01675	-0.35833	-0.06572	-0.17126
-80	-0.00646	0.009334	-0.0127	-0.26736	-0.05563	-0.11453
-60	-0.00545	0.009334	-0.0108	-0.20329	-0.05214	-0.0597
-40	-0.00471	0.007119	-0.00729	-0.12783	-0.0409	-0.03187
-20	-0.00377	0.005221	-0.00648	-0.06613	-0.02059	-0.01621
0	-0.00262	0.004746	0.005402	0.004271	-0.00289	-0.00486
20	-0.00161	0.004904	0.006483	0.084955	0.027985	0.050243
40	0.002624	-0.00601	0.015937	0.183199	0.084628	0.1745
60	0.005045	0.017244	0.031064	0.281443	0.156677	0.327391
80	0.009553	-0.02689	0.061048	0.453567	0.254961	0.505943
100	0.012916	-0.04018	0.096434	0.504509	0.416482	0.67369
120	0.018769	-0.06043	0.140465	0.679639	0.588766	0.821178
140	0.024689	-0.07847	0.187736	0.901123	0.750286	0.950297
160	0.031954	0.05284	0.247164	1	1	1

## Sheet: B_Icilin
25 uM icilin
V (mV)	Icilin (+ 25 μM)			PregS (40 μM) + Icilin (25 μM)
-160	-0.04904	-0.01278	-0.02026	-0.6741	-0.21056	-0.31551
-140	-0.0424	-0.01083	-0.02161	-0.57633	-0.21897	-0.26013
-120	-0.056	-0.0109	-0.01756	-0.50657	-0.22846	-0.19152
-100	-0.04445	-0.00975	-0.01486	-0.40753	-0.20814	-0.13506
-80	-0.04477	-0.00962	-0.00918	-0.29821	-0.20875	-0.08428
-60	-0.03354	-0.00827	-0.00648	-0.22053	-0.19099	-0.04538
-40	-0.02753	-0.00612	-0.00621	-0.11644	-0.13952	-0.02593
-20	-0.01297	-0.00363	-0.00432	-0.05885	-0.05429	-0.01324
0	-0.00332	-0.00101	0.003782	0.013605	0.006189	0.004592
20	0.015187	0.004575	0.006483	0.072773	0.103263	0.042139
40	0.026736	0.01036	0.017558	0.211359	0.248032	0.133441
60	0.04841	0.017625	0.046461	0.322892	0.446889	0.279308
80	0.06249	0.026505	0.078066	0.437273	0.654423	0.429498
100	0.066603	0.040969	0.136683	0.59421	0.910326	0.595624
120	0.076096	0.052405	0.176391	0.683594	1.16616	0.766343
140	0.11264	0.075143	0.247974	0.989242	1.46525	0.929498
160	0.133049	0.089539	0.327661	1.12561	1.75795	1.02917

## Sheet: C_Avg&SD Raw
Descriptives
0 uM Icilin				25 uM Icilin
	External	40 uM Preg		25 uM Icilin	25 uM Icilin + 40 uM PregS
N	5	5		5	5
Mean	0.2409	1		0.2754	1.291
Std. Deviation	0.2004	0		0.1624	0.2883
Normalised Current at +160mV Datapoints
0 uM Icilin				25 uM Icilin
V (mV)	External	40 uM Preg		25 uM Icilin	25 uM Icilin + 40 uM PregS
160	0.0528397	1		0.133049	1.12561
160	0.0319543	1		0.089539	1.75795
160	0.247164	1		0.327661	1.02917
160	0.487645	1		0.483541	1.17604
160	0.384845	1		0.343365	1.36397
Absolute evoked current at +160mV (pA)
0 uM Icilin				25 uM Icilin
V (mV)	External	40 uM Preg		25 uM Icilin	25 uM Icilin + 40 uM PregS
160	101.929	1929.02	160	256.653	2171.33
160	144.958	4536.44	160	406.189	7974.85
160	279.236	1129.76	160	370.178	1162.72
160	1438.4	2949.68	160	1426.29	3468.93
160	288.798	750.427	160	257.67	1023.56
