# Supplementary material for: Conservation of the cooling agent binding pocket within the TRPM subfamily
Source: eLife. 2024 Nov 1;13:RP99643. doi: 10.7554/eLife.99643 (PMC11530238; doi:10.7554/eLife.99643)
Supplement: Figure 4—source data 1. [file elife-99643-fig4-data1.xlsx]

## Sheet: Instantaneous Fraction Swarmplo
	0 uM icilin				25 uM icilin
	500 uM Ca	3 mM Ca			500 uM Ca	3 mM Ca
Average	0.1501938229166667	0.38099550000000004		Average	0.36655222222222217	0.6182871666666666
SEM	0.019634546257072935	0.0553929		SEM	0.0373084	0.0843979
	0.41302799999999995	0.194883			0.24270300000000003	0.739925
	0.12728699999999998	0.5818979999999999			0.407831	0.673708
	0.0837001	0.857358			0.361019	0.678342
	0.0887028	0.173156			0.21233200000000002	0.502273
	0.223759	0.174198			0.37344299999999997	0.850504
	0.195476	0.5825229999999999			0.372336	0.264971
	0.109074	0.284298			0.593535
	0.120243	0.394677			0.305614
	0.111773	0.301085			0.43015699999999996
	0.0793876	0.355986
	0.022109999999999998	0.13635999999999998
	0.0409116	0.397948
	0.0852913	0.301794
	0.0675337	0.597773
	0.0390991
	0.0476652
	0.026703300000000003
	0.061826599999999995
	0.0569106
	0.15725799999999998
	0.168493
	0.12298699999999999
	0.0715099
	0.0500171
	0.107124
	0.308295
	0.0653692
	0.128126
	0.6218090000000001
	0.069671
	0.275074
	0.469238
	0.0463123
	0.256671
	0.159092
	0.0795655
	0.0721797
	0.104715
	0.428521
	0.0976822
	0.164734
	0.13533699999999999
	0.059078399999999996
	0.0676653
	0.059815999999999994
	0.515027
	0.24334699999999998
	0.10410699999999999

## Sheet: Fraction Remaining Timecourse
Time (seconds)	0 uM icilin	25 uM icilin
0	1	1
2	0.117342	0.6189
4	-0.000961099	0.0514551
6	0.00137882	0.0308872
8	4.64822e-05	0.0289111
10	0.000746468	0.0273702
12	0.000256616	0.0283165
14	-0.00109599	0.0263512
16	0.000667135	0.0275517
18	-0.000792293	0.0259593
20	0.000242969	0.0273669
22	-0.000380409	0.0263214
24	0.0026129	0.0258168

## Sheet: Fraction Remaining Swarmplots
	0 uM icilin			25 uM icilin
Average	0.00748949		Average	0.102475
SEM	0.00470036		SEM	0.0880439
	0.0526916			0.278131
	-0.000601851			0.0253193
	-0.00780683			0.00397516
	0.00207409
	0.0112405
	0.00171275
	0.0206403
	-0.00373829
	0.0132015
	-0.00044533
	-0.000823911
	0.00172938
