# Supplementary material for: Conservation of the cooling agent binding pocket within the TRPM subfamily
Source: eLife. 2024 Nov 1;13:RP99643. doi: 10.7554/eLife.99643 (PMC11530238; doi:10.7554/eLife.99643)
Supplement: Figure 5—source data 1. [file elife-99643-fig5-data1.xlsx]

## Sheet: Avg&SEM
0 uM icilin
	0 uM Ca		20 uM Ca		500 uM Ca		3 mM Ca
Voltage (mV)	Avg	SEM	Avg	SEM	Avg	SEM	Avg	SEM
160	0.00419953	0.00437756	0.422296	0.122614	1		1.71741	0.192202
140	0.0022625	0.00211502	0.300932	0.098187	0.741126	0.0149755	1.38555	0.17478
120	0.00260988	0.00198976	0.22269	0.0774433	0.527694	0.0177427	1.0858	0.138382
100	0.00334842	0.00234948	0.153219	0.0527961	0.362219	0.0170105	0.817576	0.113511
80	0.00222229	0.00169029	0.099844	0.0333827	0.231855	0.0160903	0.57159	0.0836976
60	0.000786471	0.000991349	0.0651098	0.0249605	0.133899	0.0127291	0.374355	0.061593
40	0.000730163	0.000689305	0.0382433	0.0153715	0.0665924	0.00804906	0.203024	0.0371834
20	0.000503372	0.000428719	0.0141604	0.00630906	0.0229224	0.00285245	0.074251	0.0163178
0	-2.71e-05	0.000357921	-0.00464776	0.002451	-0.00870583	0.00263995	-0.027635	0.0109777
-20	0.000193169	0.000436259	-0.0190976	0.00756134	-0.0343561	0.00693898	-0.0960915	0.0298617
-40	-0.000529968	0.000713003	-0.0295824	0.011866	-0.0541701	0.0114374	-0.164964	0.0471478
-60	-0.00130018	0.00100898	-0.0436761	0.0189911	-0.0694985	0.0162607	-0.206507	0.0655271
-80	-0.0021314	0.0014121	-0.0451541	0.0203119	-0.0839869	0.020663	-0.261524	0.0888074
-100	-0.00272594	0.00162096	-0.0635094	0.0274982	-0.103647	0.0243778	-0.305905	0.115045
25 uM icilin
	0 uM Ca		20 uM Ca		500 uM Ca		3 mM Ca
Voltage (mV)	Avg	SEM	Avg	SEM	Avg	SEM	Avg	SEM
160	0.116562	0.0149413	2.56446	0.262173	3.41626	1.47891	3.70963	1.36332
140	0.0826486	0.0112945	2.14954	0.238183	2.94407	1.30837	3.23973	1.22441
120	0.0663987	0.00687252	1.75458	0.206536	2.4377	1.12154	2.68702	1.06751
100	0.0440136	0.00598771	1.35804	0.171492	1.93719	0.919621	2.16643	0.890842
80	0.0307436	0.00266543	1.00624	0.131027	1.43998	0.699412	1.67341	0.703669
60	0.0216732	0.00424733	0.68683	0.0985905	1.00685	0.502316	1.20201	0.519512
40	0.0127231	0.00303644	0.403636	0.0627661	0.601999	0.30697	0.756502	0.335835
20	0.00556994	0.0016455	0.163921	0.0268234	0.242986	0.131054	0.351612	0.159586
0	-0.000191829	0.00132642	-0.050324	0.0169861	-0.0697428	0.0229507	-0.0170901	0.021823
-20	-0.00555757	0.00110317	-0.244788	0.0580045	-0.347025	0.156391	-0.36457	0.172164
-40	-0.00931914	0.00120663	-0.433986	0.101849	-0.610501	0.277317	-0.706264	0.326784
-60	-0.0144477	0.00202167	-0.61511	0.151722	-0.84562	0.385871	-1.0374	0.475273
-80	-0.0202477	0.00339213	-0.796891	0.206848	-1.08403	0.482925	-1.34797	0.605179
-100	-0.0231842	0.0016345	-1.00583	0.255981	-1.31894	0.551497	-1.67673	0.726272

## Sheet: 0uM_Ca
0 uM icilin
Voltage (mV)	Normalized Current (to 500 uM Ca at +160 mV)
160	0.00454751	0.000744325	0.0262384	0.00448614	0.00328047	0.000114976	0.00412097	-0.011078	0.0348139	-0.00567848	-0.00264318	0.0729816	-0.0232502	-0.0142253	-0.013332	-0.00202441	-0.000365472	0.00121194	0.00252284	0.00529956	0.000424609
140	-0.00193269	0.00140595	0.015041825312059224	0.011283326554912558	0.00235058	-0.00044713	0.00299104	-0.00654276	0.024969969883341218	-0.00330569	-0.00586656	0.019483306496983335	-0.0163059	0.00937294	-0.0120039	0.000899736	-0.000874668	0.000492349	0.00253955	0.00387177	8.939126652328363e-05
120	0.00829923	0.000537567	0.014589451542155515	0.00978793	0.00183396	-0.000178852	0.00199402	-0.00557619	0.028411346249264394	-0.00265672	-0.0030085	0.0172228	-0.0139764	-0.000870936	-0.00689584	-0.00179947	-0.000661134	0.00132556	0.00253955	0.00375601	0.000134087
100	0.014438347744129821	0.00103378	0.00486315	0.00367048	0.00180814	0.000191627	0.000332336	0.00245353	0.025850334052594532	-0.00166299	-0.00541529	0.0369214	-0.0138446	0.00116125	-0.00526128	-0.0010122	-0.000464026	0.000568096	0.000852089	0.00331866	0.000514
80	0.013074089251321558	0	0.00531552	0.00299076	0.00105905	-0.000217177	0.00179462	-0.000743495	0.015926375731280938	-0.000912616	-0.00236382	0.0227126	-0.017075	0.00377406	-0.00173673	-0.000449868	-0.00033262	0.000568096	0.000634885	0.00213526	0.000514
60	0.00534332	-8.27027e-05	0.00520244	0.00502991	0.000955728	-3.83254e-05	0.000132935	-0.00104089	0.010324129097769523	-0.000324485	-0.00326636	0.00667383	-0.01257	0.00170039	-0.00393318	-0.000955969	-0.000258704	0.000908953	0.000534642	0.00128631	0.000893913
40	0.00466119	-8.27027e-05	0.00214883	0.00163132	0.000206644	-0.000281053	0.00199402	0.00371746	0.00824331	-0.000446167	-0.000236382	0.00333692	-0.00885612	-0.000705043	-0.00163457	-0.00078727	-6.15964e-05	0.000833208	0.000400982	0.0011834	6.70434901685959e-05
20	0.00329695	0	0.00463694	0.000679717	-0.000206644	-2.55503e-05	0.00152875	0.00156134	0.00368147	-0.000202803	-0.000236382	0.000753499	-0.00496648	-0.00203219	0.000408642	-0.000449868	-0.000156044	0.00087108	0.000384274	0.000463069	0.000581044
0	-0.00466119	-0.000992433	-0.00226193	0.00380642	0	3.832542847407053e-05	0.00106348	0.000148699	0.00184074	6.0840941819750146e-05	0.000881056	-0.00182992	-0.00118668	0.000124419	0.000561884	0.000618569	-1.23193e-05	0.000757461	-1.67076e-05	0.000154356	0.000335217
-20	-0.00591177	-0.000413514	0.000113097	0.000407831	0.000103322	0.000319378	6.646741591338701e-05	0.00520446	-0.000480193	0.000770649	0.00146127	0.00182992	0.00217558	-0.00153451	0.00173673	-0.00129337	8.212848908979494e-06	3.787310605802059e-05	-0.000217198	-0.000282987	-4.46956e-05
-40	-0.012733	-0.00215027	0.000113097	-0.00231104	-0.000645762	5.1100540600278134e-05	0.00232636	-0.000148699	-0.00152061	0.000344765	0.0026002	-0.00193757	0.00461486	-0.00149303	0.00204321	-0.000506101	-1.23193e-05	0.000416604	3.341513501794619e-05	-0.000527383	0.00031287
-60	-0.0125057	-0.00115784	-0.00214883	-0.00706908	-0.000904068	0.000255503	0.00239282	-0.00304832	-0.00400159	0.000324485	0.00105297	-0.0119483	0.00832874	0.000331785	0.00148133	0.000674802	0.000139619	0.00132556	-0.000634885	-0.000617428	0.000424609
-80	-0.0167121	-0.000992433	-0.00667269	-0.00475803	-0.00116238	0.000562105	0.00199402	-0.00542751	-0.00296118	0.000141962	0.00494253	-0.0198062	0.010658159466438541	-0.00240544	-0.00132809	-0.000674802	0.00018479	0.00121194	-0.000501227	-0.00120913	0.000156435
-100	-0.0190996	-0.00103378	-0.00780364	-0.00611748	-0.0012657	-8.94261e-05	-0.000265869	-0.00832712	-0.00704283	-2.02803e-05	-0.00100999	-0.0213132	0.014437922785672417	0.00053915	0.00127701	-0.0011809	0.000303875	0.00223451	-0.000685008	-0.00136348	0.000581044
25 uM icilin
Voltage (mV)	Normalized Current (to 500 uM Ca at +160 mV)
160	0.1427751121262076	0.0786973	0.10673121749317939	0.13804241882345358
140	0.10862704106536014	0.0614159	0.0662432	0.0943082
120	0.0796911	0.0505152	0.059495133351440535	0.0758932
100	0.0575776	0.0327683	0.035202226375167726	0.0505061
80	0.0386576	0.0282486	0.028960308741319694	0.027107931981666302
60	0.0325638	0.017414427990618046	0.023730637792434704	0.012984058706491707
40	0.017668005120506893	0.00664674	0.018219649828319397	0.0083581
20	0.00867433	0.00272515	0.00815386	0.00272644
0	0.00107311	-0.00206049	0.00292414	-0.00270408
-20	-0.00434355	-0.00777667	-0.00309285	-0.00701721
-40	-0.00983685	-0.0111665	-0.00579206	-0.0104811
-60	-0.0118426	-0.0146893	-0.0111905	-0.0200683
-80	-0.0159306	-0.0297108	-0.0147894	-0.02056
-100	-0.0212195	-0.0279163	-0.0208064	-0.0227948

## Sheet: 20uM_Ca
0 uM icilin
Voltage (mV)	Normalized Current (to 500 uM Ca at +160 mV)
160	0.12974410453357355	0.9238890876152452	0.5887374907711314	0.4582581349774986	0.20647537174033387	0.22666965174265188
140	0.020339	0.6744285335148795	0.45555669266588206	0.350017	0.13417746438012687	0.171072
120	-0.00179462	0.4761893772428834	0.3866643762015804	0.28836432925648514	0.0758251	0.1108922055388631
100	0.00152875	0.2987607167995569	0.2781036411084877	0.22514271550622372	0.042304390428741005	0.0734737
80	0.011698239326109196	0.1539815146025409	0.21071206660867406	0.14896323090865432	0.0300795	0.0436297
60	-0.00604853	0.10700270011423561	0.14849231354030365	0.098055	0.016873295974280868	0.026283867074930408
40	-0.00445331	0.0608244	0.0924575	0.0575267	0.00840996	0.014694764604461506
20	-0.00179462	0.017527001142356023	0.041311	0.017965035669194364	0.00298536	0.00696864
0	-0.00206049	-0.0140056	-0.00292036	-0.00999249	6.980917872250986e-05	0.00102257
-20	-0.00146228	-0.0328932	-0.0394857	-0.0352639	-0.00180682	-0.00367369
-40	-0.0032569	-0.0428972	-0.0640046	-0.0590954	-0.00335494	-0.00488562
-60	-0.00478564	-0.0591438	-0.112069	-0.0784575	-0.00438156	-0.00321921
-80	-0.0155533	-0.0296118	-0.124156	-0.0894596	-0.00562991	-0.00651416
-100	-0.0218013	-0.0762704	-0.179359	-0.0913511	-0.00731354	-0.00496137
25 uM icilin
Voltage (mV)	Normalized Current (to 500 uM Ca at +160 mV)
160	1.7323356908103114	2.8268078025153813	2.362284103774721	2.5799139473855024	3.320976615677082
140	1.380143535321166	2.342979770194653	1.9902078866860984	2.1935071076863157	2.8408528873959864
120	1.072530797492976	1.9009245999838915	1.6380591621901575	1.8158770782911877	2.345512836003641
100	0.795518	1.410885243395178	1.288289210608725	1.4283760350886954	1.867112926222179
80	0.5809036912276517	1.0087859523052203	0.9611206128200805	1.0806233250804425	1.3997808978355606
60	0.36008734340415705	0.6855022231080374	0.6650627514272637	0.7477907289435372	0.9757054364724551
40	0.19745273246238346	0.39183490709633556	0.3913581287789368	0.4499230348383268	0.5876134780052037
20	0.0748873	0.17205777760182817	0.14858056512417794	0.18437885405365304	0.23970260103268004
0	-0.0217095	7.574607560341992e-05	-0.0791102	-0.0627586	-0.0881177
-20	-0.0939504	-0.12839	-0.300269	-0.298268	-0.403065
-40	-0.160444	-0.244584	-0.517116	-0.529752	-0.718036
-60	-0.205764	-0.333397	-0.745477	-0.755316	-1.0356
-80	-0.251251	-0.391229	-0.988317	-0.992317	-1.36134
-100	-0.344126	-0.492501	-1.24328	-1.23668	-1.71258

## Sheet: 500uM_Ca
0 uM icilin
Voltage (mV)	Normalized Current (to 500 uM Ca at +160 mV)
160	1	1	1	1	1	1	1	1	1	1	1	1	1	1	1	1	1	1	1	1	1
140	0.8442445600950702	0.6578582979960204	0.6793718865417072	0.6542956404137613	0.7598556864205578	0.7439976791947175	0.833168	0.7652774911763996	0.6891551181011505	0.8155688272575092	0.8090671789191576	0.6559722195278096	0.8412464553332383	0.6649395690228644	0.7992027691344613	0.7364347998816274	0.7285829314718933	0.6488035351308404	0.7248934068845904	0.6960849769568159	0.8156319728055548
120	0.6245994344957587	0.42988903214267093	0.5031674724629647	0.5584553040734225	0.5688906475489968	0.49119107042538895	0.5341988562447741	0.4259474148257925	0.4581828461973392	0.6378562708791731	0.6595904045606996	0.4033367606262246	0.6657050520412529	0.47764614430184843	0.6175611731997864	0.4459885113852416	0.5253638955249065	0.44542430170381403	0.5312335894779948	0.4880240353854285	0.5893123253022724
100	0.4595254681801417	0.2670055074040676	0.37638500485108395	0.29132737812317777	0.3928820818397654	0.2964469576268845	0.3575277254029138	0.30669146475785686	0.3418154229602022	0.49094584024737015	0.4880204178059379	0.3216357886976933	0.5085800738241212	0.31154579225496865	0.4661591147607387	0.2557493746934275	0.3459249917851529	0.2876839678212449	0.3732306747283983	0.30879025602507393	0.358727
80	0.31207310576568453	0.18173986272478632	0.23818129193741697	0.2664497572018679	0.26427168195149203	0.17458487976939302	0.20624800849071748	0.13501837077612844	0.18855538118920417	0.3555340316815181	0.3578600032532165	0.17836382330688497	0.354487	0.18040795581101582	0.3343214331743782	0.11780917710871214	0.21212955479969095	0.16724707282811832	0.21813407848143956	0.18440435455902668	0.24113320928284318
60	0.1917915830020899	0.10623163888122938	0.0497623	0.16585145948382735	0.1330273264745589	0.0935142	0.10880696315498195	0.0727879	0.0947579	0.23644836585062756	0.2344476890544759	0.10236793605835451	0.24535668456822393	0.10513435334743512	0.21893101099184356	0.0797954	0.12057278946604973	0.0934328	0.11930901163490955	0.0991353	0.14041146097645454
40	0.11255091587099947	0.0513584	0.0268039	0.0588635	0.0814694	0.0465911	0.047524059827933604	0.0255762	0.0521809	0.12833354044985712	0.1318582836959637	0.031324	0.1356771699697416	0.050846	0.12080496382081636	0.022943177165466053	0.0593543	0.0422284	0.0592785	0.044982056917127984	0.0678927
20	0.030241	0.014969258400840645	0.015946613617278012	0.021343156326716614	0.032004003538010334	0.016518239503421347	0.018677302424310666	0.00728624	0.017767097838754718	0.0481657	0.046825015685150614	0.00365985	0.042215	0.020653566436702568	0.044542006517776594	0.00629814	0.021144	0.018141162241155008	0.015788668609833065	0.015294136738346268	0.023889788389196327
0	-0.0262619	-0.00124054	0.00610723	-0.0115552	0.00488196	0.00103478	0.00319044	-0.00639405	-0.000320128	-0.0274596	-0.0231439	-0.0151776	-0.0366772	0.000165893	-0.0188487	0.000224934	-0.000817179	0.00128768	-0.0132992	-0.00710041	-0.0114197
-20	-0.0763984	-0.0118678	-0.0191133	-0.0391518	-0.0125795	-0.00908314	-0.0141575	-0.00758363	-0.0104042	-0.0890306	-0.0838943	-0.0274489	-0.106757	-0.0131055	-0.0733003	-0.0070292	-0.0127792	-0.00643841	-0.0375252	-0.0227547	-0.0410753
-40	-0.114597	-0.00789811	-0.035173	-0.0430941	-0.025753	-0.011587	-0.0235959	-0.00773234	-0.0315325	-0.159505	-0.130719	-0.0345532	-0.174332	-0.0268746	-0.114982	-0.00821008	-0.0182531	-0.0092789	-0.0583596	-0.0312572	-0.0702839
-60	-0.152228	-0.00988298	-0.0190002	-0.0581838	-0.0261146	-0.0118426	-0.0296444	-0.0251301	-0.0354543	-0.201404	-0.182014	-0.0142088	-0.254784	-0.0303168	-0.158196	-0.00157454	-0.0205691	-0.0143159	-0.0755017	-0.0459339	-0.0931684
-80	-0.195316	-0.00450729	-0.0322325	-0.0494833	-0.0249264	-0.0129412	-0.038684	-0.00342007	-0.0406563	-0.258837	-0.206468	-0.0369214	-0.313569	-0.0326809	-0.20902	-0.00208064	-0.0245688	-0.00852143	-0.0980235	-0.0474388	-0.123427
-100	-0.24909	-0.0120333	-0.0425244	-0.0895869	-0.0306608	-0.0177702	-0.0364904	-0.021487	-0.042577	-0.3227	-0.239218	-0.05113	-0.368442	-0.038487	-0.240793	-0.00984087	-0.0276937	-0.0112862	-0.125958	-0.0640577	-0.134757
25 uM icilin
Voltage (mV)	Normalized Current (to 500 uM Ca at +160 mV)
160	2.724845919378759	1.9486179371713892	2.126620459658311	1.0478614696297388	9.233376169029386
140	2.2383014241744483	1.6799915718912772	1.819809438017044	0.8793474858689448	8.102919178365406
120	1.7592988679639001	1.302338800170522	1.5312065012446183	0.7248817041960488	6.8707713262985495
100	1.3282472444348392	1.0256959314775158	1.1982069828005473	0.5555502365916078	5.578261627459168
80	0.9661328186133862	0.7203631926851856	0.8944506069760924	0.4079778321948705	4.210998909513984
60	0.6357780046652707	0.4959206973769962	0.6333658363620247	0.27077679376944747	2.998431159523105
40	0.357317	0.293774	0.3766701725216042	0.16161821295085893	1.8206170772542454
20	0.1360872837840859	0.10304538928552177	0.15659695685402628	0.0563928	0.7628071299137745
0	-0.0542944	-0.0647093	-0.034696	-0.036267	-0.158747
-20	-0.210727	-0.221316	-0.20997	-0.124432	-0.968678
-40	-0.358724	-0.390702	-0.378996	-0.21183	-1.71225
-60	-0.465575	-0.546901	-0.532071	-0.304082	-2.37947
-80	-0.597238	-0.72689	-0.678697	-0.413444	-3.00388
-100	-0.740065	-0.973084	-0.852709	-0.52388	-3.50498

## Sheet: 3mM_Ca
0 uM icilin
Voltage (mV)	Normalized Current (to 500 uM Ca at +160 mV)
160	1.0150424367932296	1.8492397551928417	1.9161701187110325	2.147758608710652	1.6588359282153242
140	0.7618199310249241	1.511963504329206	1.5928045826694788	1.776471800228559	1.284713989939382
120	0.6457811875779639	1.162863400937872	1.2768987778934087	1.4287812322561015	0.9146895484681101
100	0.47127261461195413	0.8704472287692511	0.9538832045531991	1.1242270548183146	0.6680489427381923
80	0.3295630763210032	0.6167758564085477	0.6685761122827699	0.8019271820353284	0.44110801336432737
60	0.1938472764628668	0.44548728678599947	0.4246456627648896	0.5341988562447741	0.27359797890708504
40	0.0927393	0.24524228362545875	0.22638810863579018	0.30335627711746854	0.14739552579061058
20	0.0249943	0.0841493	0.0851335	0.12223326952517627	0.0547446
0	-0.0369825	-0.0592717	-0.00756288	-0.0358924	0.00153451
-20	-0.0494232	-0.180941	-0.060835	-0.154669	-0.0345886
-40	-0.110382	-0.308185	-0.104641	-0.242805	-0.0588089
-60	-0.132775	-0.396004	-0.102367	-0.330343	-0.0710435
-80	-0.174847	-0.505304	-0.105357	-0.443271	-0.0788404
-100	-0.167157	-0.651576	-0.114606	-0.50934	-0.0868448
25 uM icilin
Voltage (mV)	Normalized Current (to 500 uM Ca at +160 mV)
160	3.6457443756915136	2.3261814089713306	1.9348879600546847	1.9283451368998832	2.027918264865344	10.394703237811083
140	3.206224644510921	1.8983626837975007	1.7043252857961864	1.6414632124734074	1.7456977409995758	9.242314911281463
120	2.5301233454903085	1.4974624207239366	1.3141675527614307	1.366811563504416	1.469392448915541	7.9441703590496155
100	1.983969184116707	1.1423309957297123	1.0061201789503085	1.1157685825589643	1.1885686768232642	6.561827314039704
80	1.5197803548744004	0.8225199913550898	0.7629153416079066	0.8816527449048195	0.9069471031176553	5.146668342258563
60	1.079465639470557	0.5548527011618462	0.5168586674768104	0.6465745098219796	0.6475921005661277	3.7667
40	0.6617751915748064	0.3258907611247327	0.30709676154822396	0.4265617085547462	0.4020608677110761	2.415629218539073
20	0.3391308445682908	0.13352362072691773	0.11160971976538497	0.22014127441680556	0.1729478170662463	1.1323177084389024
0	0.0633242	-0.0306827	-0.0651169	0.0330365	-0.03669	-0.0664118
-20	-0.183833	-0.176198	-0.227162	-0.136055	-0.242273	-1.2219
-40	-0.432582	-0.316958	-0.415172	-0.287594	-0.450583	-2.33469
-60	-0.683264	-0.439276	-0.595024	-0.437727	-0.665338	-3.40376
-80	-0.907458	-0.568705	-0.772025	-0.589342	-0.890728	-4.35955
-100	-1.19134	-0.713229	-1.00463	-0.732974	-1.13287	-5.28533
