# Supplementary material for: Conservation of the cooling agent binding pocket within the TRPM subfamily
Source: eLife. 2024 Nov 1;13:RP99643. doi: 10.7554/eLife.99643 (PMC11530238; doi:10.7554/eLife.99643)
Supplement: Figure 5—source data 2. [file elife-99643-fig5-data2.xlsx]

## Sheet: Avg&SEM
0 uM icilin
	0 uM Ca		20 uM Ca		500 uM Ca		3 mM Ca
Voltage (mV)	Avg	SEM	Avg	SEM	Avg	SEM	Avg	SEM
160	0.00419953	0.00437756	0.422296	0.122614	1		1.71741	0.192202
140	0.00258643	0.00243032	0.344879	0.112501	0.850045	0.0174062	1.58303	0.199924
120	0.00350223	0.00268196	0.29918	0.104098	0.709685	0.0244546	1.4465	0.18442
100	0.00555565	0.00393572	0.248818	0.0860795	0.589263	0.0288613	1.30612	0.181005
80	0.00467551	0.00364052	0.205217	0.0699482	0.477516	0.0347661	1.14063	0.16681
60	0.00214552	0.00287246	0.182629	0.0714422	0.377957	0.038597	0.997816	0.168005
40	0.00320562	0.00321278	0.168901	0.0705361	0.29666	0.0395258	0.81495	0.156175
20	0.00504317	0.00493753	0.150786	0.076325	0.244094	0.037338	0.612381	0.14662
0
-20	-0.000644339	0.00234965	0.124497	0.0467293	0.207901	0.0354755	0.788499	0.22531
-40	0.0016297	0.00225345	0.103426	0.03919	0.182659	0.0352779	0.659622	0.165899
-60	0.00275291	0.00217329	0.104376	0.0435576	0.161296	0.0357397	0.547485	0.16055
-80	0.00363465	0.00232642	0.0821509	0.0349857	0.149128	0.035308	0.519959	0.167483
-100	0.00384296	0.00219919	0.0941916	0.0389735	0.149201	0.0339118	0.483104	0.17158
25 uM icilin
	0 uM Ca		20 uM Ca		500 uM Ca		3 mM Ca
Voltage (mV)	Avg	SEM	Avg	SEM	Avg	SEM	Avg	SEM
160	0.116562	0.0149413	2.56446	0.262173	3.41626	1.47891	3.70963	1.36332
140	0.0944962	0.0129631	2.46637	0.273916	3.36666	1.49342	3.70803	1.39812
120	0.0886299	0.00937151	2.36161	0.279852	3.25431	1.49113	3.59414	1.42029
100	0.0705656	0.00978494	2.21154	0.284468	3.10627	1.46408	3.4855	1.41977
80	0.0614763	0.00498344	2.07472	0.280577	2.88982	1.38742	3.37814	1.39831
60	0.0574814	0.010648	1.93128	0.294711	2.69992	1.32167	3.25638	1.37098
40	0.0508287	0.0114666	1.78963	0.312061	2.4353	1.19842	3.11964	1.3191
20	0.0442619	0.0114559	1.74112	0.365255	2.00502	0.989915	3.14499	1.26936
0
-20	0.0458813	0.0112253	1.51638	0.271437	2.73531	1.34164	2.8855	1.46335
-40	0.037643	0.00566625	1.48361	0.299153	2.40835	1.15507	2.77724	1.35484
-60	0.0381065	0.00382299	1.45178	0.32357	2.22805	1.06059	2.72331	1.30179
-80	0.0408159	0.00775105	1.4355	0.345586	2.14267	0.990881	2.65843	1.23788
-100	0.0372599	0.00342413	1.46885	0.349178	2.08431	0.903251	2.64529	1.18548

## Sheet: 0uM_Ca
0 uM icilin
Voltage (mV)	Normalized Conductance (to 500 uM Ca at +160 mV)
160	0.00454751	0.000744325	0.026238371666408487	0.00448614	0.00328047	0.000114976	0.00412097	-0.011078	0.0348139	-0.00567848	-0.00264318	0.0729816	-0.0232502	-0.0142253	-0.013332	-0.00202441	-0.000365472	0.00121194	0.00252284	0.00529956	0.000424609
140	-0.00222843	0.00160902	0.017118807852538893	0.0129804	0.00267348	-0.000510086	0.00340739	-0.00754431	0.028546150616584127	-0.00380377	-0.00674621	0.0226287	-0.018801	0.010709542332400249	-0.0137948	0.0010277	-0.00100029	0.000561049	0.00292769	0.00445113	0.00010278
120	0.0112979	0.000719072	0.0192639	0.013253438170421137	0.00241807	-0.00023747	0.00263893	-0.00759195	0.0379098	-0.00359934	-0.00406984	0.023854249951506395	-0.0190266	-0.00116064	-0.00931431	-0.00239621	-0.000882887	0.00175547	0.00345589	0.00507786	0.00018133
100	0.0239892	0.0016637	0.00764625	0.00603916	0.00283557	0.000304299	0.000524663	0.00407745	0.041415632900333586	-0.00273891	-0.00889464	0.0633298	-0.0230028	0.00185626	-0.00861765	-0.00161578	-0.00074453	0.000897958	0.0014148	0.00544468	0.000843728
80	0.027867081769549388	0	0.010327624789231877	0.00626943	0.00204891	-0.00042894	0.00351035	-0.00158536	0.0319235	-0.00191635	-0.00494073	0.0511541	-0.0363955	0.00753637	-0.00361293	-0.000896276	-0.000668363	0.00111347	0.0013517	0.00445435	0.00107322
60	0.015881528929353694	-0.000224149	0.013225568028537558	0.014524763364235804	0.00241282	-0.000100095	0.000341695	-0.00309587	0.0276331	-0.000939762	-0.00938492	0.021881130237936204	-0.0373619	0.00452262	-0.0112097	-0.00253295	-0.000695293	0.00234414	0.00158593	0.0036835	0.00256379
40	0.022878311408313246	-0.000340683	0.00789911	0.00756787	0.000750543	-0.00108319	0.00747233	0.0182709	0.033194	-0.00208158	-0.00108605	0.0201013	-0.0434707	-0.00280703	-0.00739463	-0.00311302	-0.000249889	0.00314055	0.00196042	0.00540244	0.000306973
20	0.046417527367969356	0	0.030767865147346626	0.00801374	-0.00133709	-0.000187808	0.010567655032170017	0.022081754616269517	0.029916114547449003	-0.00243176	-0.0027089	0.027901613621269312	-0.0699366	-0.0160819	0.00447961	-0.00350424	-0.00129056	0.00609756	0.00533998	0.00520944	0.00659259
0	0.0755678	0.10275022526925577	-0.0769892	-0.0828904	0	0.00303624	0.0473246	-0.00239647	-0.830172	-0.00127964	-0.0204279	0.0163395	0.019233652015865528	0.0797529	-0.0145556	0.1602095567520291	0.00263626	0.037115544925076016	0.000275634	-0.00374034	-0.00795665
-20	0.030411530620449684	0.00304355	-0.00123001	-0.00230855	-0.00118746	-0.00288249	-0.000666547	-0.0267162	0.00376639	-0.00431763	-0.00842125	-0.00729073	-0.0111906	0.012450863670342226	-0.0103114	0.010719459624208255	-6.3051e-05	-0.000371157	0.00112426	0.00165078	0.00025926
-40	0.0389267	0.00820485	-0.000530285	0.00751799	0.00310776	-0.000218172	-0.0104833	0.000453957	0.00601574	-0.00111419	-0.00855573	0.00496822	-0.0141074	0.00601908	-0.0068506	0.00206425	4.815204818640129e-05	-0.00185578	-0.000102573	0.0017487	-0.00103372
-60	0.0271973	0.00298196	0.00642205	0.0161342	0.00275153	-0.000714405	-0.00695384	0.0066222	0.010584857229697217	-0.000736837	-0.00242451	0.022586987554998217	-0.0181124	-0.00088985	-0.00346041	-0.00182531	-0.000366044	-0.00382072	0.00138517	0.00143008	-0.000980781
-80	0.028205009015157104	0.00192897	0.0146353	0.00836383	0.00258681	-0.00116846	-0.00427633	0.0091515	0.00588323	-0.000248482	-0.00875256	0.029650475726353157	-0.017987	0.00483351	0.0023805	0.00136542	-0.00036447	-0.00258195	0.000848211	0.00215185	-0.000277763
-100	0.026335759998940396	0.00161353	0.013518468374670157	0.00874399	0.00222002	0.000147937	0.000451787	0.011472553876666826	0.0112039	2.8878614813422788e-05	0.00145305	0.026410758486246855	-0.0199072	-0.000866154	-0.00185685	0.0019086	-0.000480364	-0.00377555	0.000946798	0.00197017	-0.000837888
25 uM icilin
Voltage (mV)	Normalized Conductance (to 500 uM Ca at +160 mV)
160	0.14277511212620764	0.0786973	0.10673121749317939	0.13804241882345358
140	0.12392172922696894	0.069965	0.0756648	0.10843339487374269
120	0.10580961563166204	0.0668529	0.0792249	0.10263225322125087
100	0.0914317	0.0517318	0.0561934	0.0829055
80	0.0763514	0.0552556	0.0576978	0.0566005
60	0.0850477	0.044762	0.0628771	0.037239
40	0.0680935	0.024907785294871327	0.0720441	0.0382693
20	0.0637608	0.0188379	0.0635142	0.030934479352674082
0	0.0850145	-0.0916914	0.7573541728324468	0.0641836
-20	0.0392019	0.0779858	0.0256335	0.040703859712819326
-40	0.0419981	0.050320010339217645	0.023624314361850394	0.0346297
-60	0.0331127	0.042688846940704815	0.0302698	0.046354691740607044
-80	0.0331152	0.0637172	0.029925472110338316	0.036506
-100	0.035103222226724615	0.0474378	0.0336278	0.032870958686628114

## Sheet: 20uM_Ca
0 uM icilin
Voltage (mV)	Normalized Conductance (to 500 uM Ca at +160 mV)
160	0.12974410453357355	0.9238890876152454	0.5887374907711314	0.45825813497749857	0.20647537174033384	0.22666965174265188
140	0.023170195196519312	0.7710196923658269	0.524197	0.4024990054075293	0.15344811135839506	0.19494268944759693
120	-0.00237503	0.6353887845403153	0.5238548174852006	0.3900940335319981	0.101258	0.14685724431434943
100	0.00241346	0.47865393719231625	0.45803225370427286	0.36979799314785156	0.0678773	0.11613582584789356
80	0.022882268972350493	0.30864739165665556	0.4424611782850813	0.3113552353912881	0.060441471162195046	0.0855142
60	-0.0155471	0.28639891866135436	0.4300584185314932	0.28173197742798634	0.0453486	0.0677847
40	-0.0166882	0.24492682645264777	0.4313575392796745	0.264305	0.0341181	0.055387956128319815
20	-0.0124055	0.14242662243392773	0.4953492441355662	0.20587658960803326	0.0246906	0.0487805
0	-0.0916914	6.316525059713619	0.0614225	0.23168258860937577	-0.0149388	0.050106002371634276
-20	0.014664018197865454	0.2579972434891992	0.2212226354819734	0.20322492337544076	0.013871196471839993	0.0360022
-40	0.014676665183826034	0.16970734142315927	0.20684562758356806	0.19444858660015946	0.0131134	0.0217632
-60	0.013907646821783332	0.15644476367572685	0.2544848825204088	0.18065119838777033	0.0114873	0.00927891
-80	0.0333554	0.058832313601930926	0.21731473323357028	0.15842102690462548	0.011104147751664585	0.013878
-100	0.0370466	0.12133321924234892	0.25540169371474297	0.13142408799984526	0.011561193958127911	0.00838301
25 uM icilin
Voltage (mV)	Normalized Conductance (to 500 uM Ca at +160 mV)
160	1.7323356908103116	2.8268078025153813	2.362284103774721	2.5799139473855024	3.320976615677082
140	1.579486293332705	2.669907173272408	2.2943911564529107	2.521731961619991	3.2663479792711274
120	1.4346600428881167	2.5174406717445597	2.2291183757109296	2.45494	3.171894916124803
100	1.2802482113213642	2.230108909761918	2.1390584222026536	2.343426798061962	3.064854938214209
80	1.1731383639428667	1.9772204322956408	2.0462767185753896	2.254276149829946	2.922696348777437
60	0.975943	1.7678741040037318	1.972803871994872	2.1413937205123155	2.798375959653765
40	0.8133794739662734	1.4769161145464578	1.913370596423284	2.0539836126915088	2.690511391426034
20	0.6425409820605588	1.2044043129230866	2.0647175250225827	2.0742247982529354	2.7196948482257226
0	2.2476602132827566	0.00371155	1.3051205846564404	1.5207564467505328	2.091544383055763
-20	0.6914925890563951	1.2582180727293515	1.554248714851596	1.739919186911495	2.3380078944462754
-40	0.612209	1.0895115570182563	1.5873692801354355	1.756559856719885	2.372392604458974
-60	0.5299356109584223	0.9609666922579624	1.6264513287464153	1.7494546243876927	2.3920668714651243
-80	0.4883513035502155	0.8334874714701417	1.672497469693347	1.765997195529905	2.41717
-100	0.5371126030319517	0.8321563602977361	1.7184239135470847	1.78695	2.469611094586057

## Sheet: 500uM_Ca
0 uM icilin
Voltage (mV)	Normalized Conductance (to 500 uM Ca at +160 mV)
160	1	1	1	1	1	1	1	1	1	1	1	1	1	1	1	1	1	1	1	1	1
140	0.9734285294900124	0.752877	0.7731798864064982	0.752704	0.8642374167037955	0.8487525577649353	0.949145	0.8824247927908474	0.7878554075721965	0.9384528346287058	0.930381	0.7618717934922311	0.9699739084519884	0.7597616110083749	0.9184394579357407	0.8411758027743792	0.8332224440133609	0.7393342591030626	0.8356860774461141	0.800243	0.9377950748602043
120	0.8502816641680583	0.5750367436837862	0.6643834738685163	0.7561819940048995	0.750078	0.6521773525920992	0.7069694758569753	0.5799244740034128	0.6113623185551654	0.8641708440940005	0.8922819339601076	0.558637	0.906245	0.6365305167384095	0.8341482988060944	0.593887	0.701578	0.5898862339422107	0.7229180626888776	0.659775	0.7969416069454683
100	0.7634972697106414	0.42969900993898835	0.5917841008114898	0.47933066132209595	0.6161280808347167	0.4707498582201797	0.5644339941088613	0.5096814951717042	0.5476332355392188	0.8085799551524746	0.8015758836080269	0.5516886341269367	0.8450094947967193	0.4980071144599598	0.7635392956716424	0.4082532400948737	0.5550362004876603	0.4547262669570081	0.6197072921420558	0.5066084442565144	0.5888489850293261
80	0.6651757219395221	0.36702470381893854	0.4627665839791152	0.5585487283349977	0.5112785080768337	0.3448172429329397	0.4034301465146971	0.28790070692276304	0.3779487864961809	0.746564	0.7479804571260752	0.40171744729395714	0.7555933475645049	0.36025389325742885	0.6954905346381789	0.234712	0.4262509844591867	0.32780425706933325	0.4644190129423691	0.384684	0.5034781882148124
60	0.5700471730289571	0.2879192422227079	0.1265050728530689	0.47892524173075157	0.3358385407279335	0.2442330175190689	0.27967707658884294	0.2164894360785882	0.25362488252912746	0.6847937637827772	0.673616	0.33562820564837753	0.7292763086946563	0.2796312056210451	0.6239600515407572	0.21142720498688525	0.3240512629089383	0.24095823414514264	0.3539113859738888	0.2838865245613552	0.40270766377703354
40	0.5524287457941307	0.2115637624922874	0.098531	0.2730734830042231	0.2959015500945989	0.17956459064358882	0.17809013067053509	0.12570426625040482	0.21012114797657871	0.5987357645685943	0.6058203613428224	0.18869334963975845	0.6659777058787126	0.20243669341640197	0.5465097739712645	0.0907219	0.24079275487417492	0.1591685944861401	0.28981562011207485	0.2053515837572919	0.3108608203845636
20	0.4257612178830472	0.12843785874514657	0.10581178834025559	0.25163186805109783	0.2070826506899976	0.12141760935869672	0.12910907228945945	0.10304828928009606	0.1443776784787049	0.5775425258956572	0.5366075923874736	0.13552202068015592	0.5944607353896361	0.16344365597750568	0.488277	0.049059232596501384	0.1748720955704952	0.12698812195079975	0.2194038012188953	0.17205594347233427	0.271056
0	0.4257612178830472	0.12843785874514677	0.20787155634187504	0.2516318680510979	0.14457355802802477	0.0819782	0.14197418764389777	0.10304828928009604	0.14437767847870359	0.577543	0.5366075923874737	0.13552202068015598	0.5944607353896361	0.10633716822758219	0.4882770239169259	0.058257972912165196	0.17487209557049543	0.0630965	0.21940380121889533	0.1720559434723342	0.27105644297302306
-20	0.39301103602561516	0.0873496	0.20787155634187504	0.22162066166305908	0.14457355802802477	0.0819782	0.14197418764389777	0.0389293	0.0816047	0.4988025504110068	0.4834809342823879	0.10936109370862009	0.5491339691053092	0.10633716822758221	0.4352031729537013	0.058257972912165196	0.0981074	0.0630965	0.19423760423289968	0.13273736322152888	0.23826021650554272
-40	0.3503406191978692	0.030137016476846884	0.1649183998369846	0.14018848081587046	0.12393759071400991	0.0494704	0.10633084248850616	0.023605783447014247	0.12474694746800824	0.5154763405658456	0.43012000136073936	0.0885999	0.5329247518420516	0.1083433363596326	0.38551773060004746	0.0334868	0.0713454	0.041333283124079294	0.17914395719008652	0.10364299651369134	0.23221816881767554
-60	0.3310649996088452	0.0254532	0.056784436438819995	0.1327968823009255	0.0794798	0.0331127	0.0861504	0.054592969525943336	0.0937823	0.45734539956726605	0.41909273136952163	0.026860215293078266	0.5540775264149397	0.08131	0.3695487035446997	0.00425906	0.0539269	0.0412636	0.16472635149416387	0.10639168670884057	0.21520452271075374
-80	0.3296338448722081	0.00876073	0.0706962	0.0869834	0.055472374617540794	0.026901104368796794	0.082961	0.00576669	0.0807754	0.4530529306097077	0.3656282407776636	0.0552724	0.5291876067378609	0.0656691	0.37465233757157773	0.00421004	0.0484582	0.018154355726810137	0.16588208853830685	0.0844254	0.2191547565403317
-100	0.343462	0.0187816	0.0736663	0.12805041474336287	0.0537788	0.0293972	0.062007630830266475	0.0296033	0.0677327	0.45951611336792314	0.34415622315046335	0.063359	0.5080135769046961	0.06183	0.35012797560921316	0.015905050132964466	0.043777954766188946	0.019069731901217465	0.17409562267768508	0.0925609	0.19432571164153742
25 uM icilin
Voltage (mV)	Normalized Conductance (to 500 uM Ca at +160 mV)
160	2.724845919378759	1.9486179371713894	2.126620459658311	1.0478614696297388	9.233376169029386
140	2.561593290373177	1.9326690009497756	2.073126893877303	1.010541328746011	9.255374061319502
120	2.353308450690558	1.7634448873520183	2.0264293810424845	0.9791076036368372	9.149253346523123
100	2.1375833458899844	1.6876117593816558	1.891626033502936	0.9099563280556853	8.904590231108134
80	1.9511108145729525	1.5100706018238723	1.7495845999345265	0.8487183066295895	8.389605553404001
60	1.7231469198150018	1.4320581839300663	1.6280015578843763	0.7717221120525494	7.944692332473052
40	1.4719163603005934	1.3628487231327244	1.4115216689597003	0.731145	7.19908
20	1.167643637622658	1.2148860929023317	1.0824950714756143	0.6181869971908995	5.941866227800086
0	5.6213	1.4091376074384432	-1.54397	0.9394991192998576	-41.1156
-20	1.550992139648042	1.2527714190724133	2.105617336352312	0.7387837202338217	8.028402278198774
-40	1.368790511068619	1.2709832895626636	1.707883522943467	0.7102342578036875	6.983837278807992
-60	1.1990671305656193	1.2482287356926924	1.5462649720981378	0.7103415546465227	6.436369991027216
-80	1.1608396251207653	1.2777524693004576	1.4555186803582343	0.7410674389874305	6.07817
-100	1.1550972014346375	1.390871182872725	1.448994284672496	0.761754	5.664835263018554

## Sheet: 3mM_Ca
0 uM icilin
Voltage (mV)	Normalized Conductance (to 500 uM Ca at +160 mV)
160	1.0150424367932296	1.849239755192842	1.9161701187110325	2.147758608710652	1.658835928215324
140	0.8670123968927236	1.7393688422465234	1.8170714793407508	2.0237566573352175	1.4679174110749589
120	0.852691	1.574586827025478	1.6953982159598435	1.8908777266635357	1.2189521843469333
100	0.7409743663554239	1.4321758857677243	1.5147410750870396	1.774832891970094	1.0678787342401288
80	0.6403138457859732	1.2929243166985644	1.3204841795731745	1.568604724526062	0.8808418589256344
60	0.49279565608272685	1.2864228459368265	1.109056334634161	1.373103063439385	0.7277025088501762
40	0.34090950824844696	1.137703128011934	0.8725121191424464	1.1367875393470164	0.5868356036042045
20	0.16584681869703857	0.9921044044062615	0.6257752295897971	0.8449519996400345	0.4332254738976869
0	-1.25877	1.2907260001920484	-0.59915	-1.59721	0.9836185665487381
-20	0.5375139273212368	1.0242264812490292	0.5490551462020042	1.5510508998527026	0.2806496234953837
-40	0.5175572376170984	1.0025475049414763	0.4467612122532349	1.0941587660325973	0.2370848176650004
-60	0.3968150078148994	0.903826	0.2862269887613644	0.9600162073655565	0.1905392847612901
-80	0.3834957804475143	0.8882413739724948	0.2190068203514935	0.9506296330912241	0.15842227141580703
-100	0.28956998791669053	0.9313260441326924	0.18959160322251567	0.8655135113664345	0.13951759841505118
25 uM icilin
Voltage (mV)	Normalized Conductance (to 500 uM Ca at +160 mV)
160	3.6457443756915136	2.3261814089713306	1.9348879600546849	1.9283451368998834	2.0279182648653435	10.394703237811083
140	3.6968322787527876	2.1725550727842884	1.9606626024230585	1.872581244570291	1.988698849364457	10.556822771330793
120	3.444315460340947	2.0030655583605426	1.7794617281905607	1.8147796257912239	1.9446234249554886	10.578612471744233
100	3.296346253151185	1.8383834201024358	1.6554031202033062	1.7718107355557795	1.8764099057660717	10.474658110546677
80	3.2393723652114956	1.661083879376594	1.5992710909453565	1.7413253033361193	1.7740282942334606	10.253746969201778
60	3.208411581624941	1.5038153505506062	1.492520252956252	1.6886727424979462	1.664568702743633	9.980301563039712
40	3.248162276159134	1.342462332875552	1.4246521482785588	1.6439920918058564	1.5066699420761092	9.551877482123256
20	4.7746035339717965	1.1456471308626284	1.3158579662403582	1.618152300996065	1.1955223355406108	8.82016
0	-1.02662	3.176695776270301	1.4180155435679378	2.61724	-1.6327	-17.2007
-20	0.9456802362720472	1.2968523468408095	1.2858617149355267	1.2279421996905784	2.429555692847645	10.127087665066075
-40	1.3224653063230252	1.2094254019344255	1.3505858228754875	1.2278703411737613	2.0304760665964383	9.522610287991768
-60	1.485961226648398	1.1313367146311721	1.3580642753190546	1.223919824304269	1.9335535736379035	9.207025150419764
-80	1.5315145751814487	1.105381240351048	1.3570914202096782	1.225074755688875	1.9102353226574795	8.821281484271577
-100	1.6426943507139116	1.1132107049685651	1.4359551152957142	1.212552890939606	1.9250660024868023	8.54228
