# Supplementary material for: Conservation of the cooling agent binding pocket within the TRPM subfamily
Source: eLife. 2024 Nov 1;13:RP99643. doi: 10.7554/eLife.99643 (PMC11530238; doi:10.7554/eLife.99643)
Supplement: Figure 6—source data 1. [file elife-99643-fig6-data1.xlsx]

## Sheet: Instantaneous Fraction Swarmplo
	0 uM icilin				25 uM icilin
	500 uM Ca	3 mM Ca			500 uM Ca	3 mM Ca
Average	0.2980554904761905	0.470966		Average	0.900954	0.9835738333333333
SEM	0.058466918685845595	0.10340401077685525		SEM	0.061178655508763835	0.0917915
	0.7488630000000001	0.374708			0.671189	0.8881129999999999
	0.0332051	0.776226			0.939375	0.687773
	0.20708000000000001	0.30840300000000004			0.9435540000000001	0.9725290000000001
	0.188146	0.652555			0.9132299999999999	0.867448
	0.144056	0.242937			1.03742	1.17889
	0.0789248					1.30669
	0.113792
	0.0965799
	0.137175
	0.7383029999999999
	0.736242
	0.15048399999999998
	0.84004
	0.14971800000000002
	0.643255
	0.0911545
	0.16153800000000001
	0.107787
	0.361669
	0.157161
	0.373992

## Sheet: Fraction Remaining Timecourse
Time (seconds)	0 uM icilin	25 uM icilin
0	1	1
2	0.120007	0.718397
4	0.00129646	0.419627
6	0.000435333	0.296194
8	0.00192426	0.203445
10	0.00148724	0.147604
12	0.00201446	0.126563
14	0.000244059	0.103119
16	0.00239169	0.0877636
18	0.00233951	0.0769354
20	0.00253053	0.0674437
22	0.00189614	0.0561534
24	0.00321077	0.0498952
26	0.0045373	0.0490891
28	0.00252825	0.0457805
30	0.00401895	0.035937
32	0.00203726	0.0352335
34	0.00432196	0.0351036
36	0.00963797	0.0333721
38	0.00484284	0.0342612
40	0.00643387	0.0321297
42	0.00562062	0.03016
44	0.00587017	0.0273122
46	0.00603991	0.0268191
48	0.0102478	0.026166
50	0.00924022	0.0246862
52	0.0106577	0.0227231
54	0.00913482	0.0226998
56	0.0103527	0.0228384
58	0.00861368	0.0233758
60	0.0095232	0.0229822
62	0.0105331	0.0229917
64	0.00884499	0.0244807
66	0.00894633	0.0242073
68	0.010755	0.0229769
70	0.0086261	0.0229088
72	0.0099349	0.0235438
74	0.00998861	0.0239941
76	0.0100028	0.0227617
78	0.00807963	0.0229823
80	0.010513	0.0242787
82	0.0110567	0.0237321
84	0.0147179	0.0239836
86	0.013861	0.0238802
88	0.0138463	0.0240143
90	0.0173446	0.0247095
92	0.0167816	0.0251291
94	0.0172521	0.0241916
96	0.0138729	0.0247636
98	0.0165569	0.0265958
100	0.0186934	0.0251371
102	0.0188852	0.026266
104	0.0198297	0.0249962
106	0.022599	0.027223
108	0.0220229	0.0266047
110	0.0208828	0.0261864
112	0.0229266	0.0272172
114	0.0231764	0.0259726

## Sheet: Fraction Remaining Swarmplots
	0 uM icilin			25 uM icilin
Average	0.00375246		Average	0.50482
SEM	0.02588		SEM	0.113432
	-0.0909757			0.814886
	0.00774143			0.521532
	0.00085794			0.293532
	0.0532276			0.389329
	0.047911
