# Supplementary material for: Conservation of the cooling agent binding pocket within the TRPM subfamily
Source: eLife. 2024 Nov 1;13:RP99643. doi: 10.7554/eLife.99643 (PMC11530238; doi:10.7554/eLife.99643)
Supplement: Figure 8—source data 1. [file elife-99643-fig8-data1.xlsx]

## Sheet: Instantaneous Fraction Swarmplo
	0 uM icilin				25 uM icilin
	500 uM Ca	3 mM Ca			500 uM Ca	3 mM Ca
Average	0.15941701904761904	0.11458531538461539		Average	0.23784833333333333	0.186552
SEM	0.027395247068831393	0.015934460615109235		SEM	0.0556112	0.0320897
	0.118105	0.109516			0.337881	0.157671
	0.563462	0.0783335			0.229938	0.124135
	0.158277	0.099326			0.145726	0.201535
	0.115723	0.102753				0.14493399999999998
	0.199042	0.12212200000000001				0.30448600000000003
	0.0829312	0.140071
	0.010547399999999998	0.0643254
	0.24731199999999998	0.041400099999999995
	0.147135	0.10898900000000002
	0.0208386	0.27026
	0.354575	0.0758331
	0.0831862	0.103612
	0.177858	0.173068
	0.15846300000000002
	0.0936693
	0.0673031
	0.189419
	0.0607828
	0.26734600000000003
	0.18133
	0.050451800000000005

## Sheet: Fraction Remaining Swarmplots
	0 uM icilin			25 uM icilin
Average	0.000672965		Average	0.0806196
SEM	0.0157233		SEM	0.0583694
	0.0866841			0.0133985
	0.0208532			0.0315746
	0.00229116			0.196886
	-0.0155592
	-0.00138015
	0.00835193
	0.0127064
	-0.116686
	-0.00433723
	0.0138059
